# Supplementary material for: Opportunities for Integrated Ecological Analysis across Inland Australia with Standardised Data from Ausplots Rangelands
Source: PubMed Central journal article supplement (PMC5241013; doi:10.1371/journal.pone.0170137), 2017-01-17

**NSABHC0001-53596**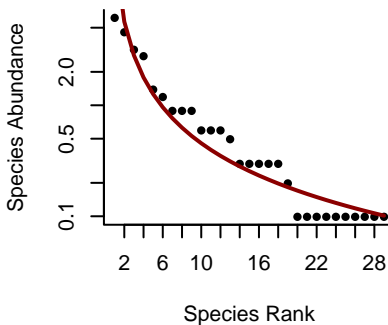**NSABHC0002-53597**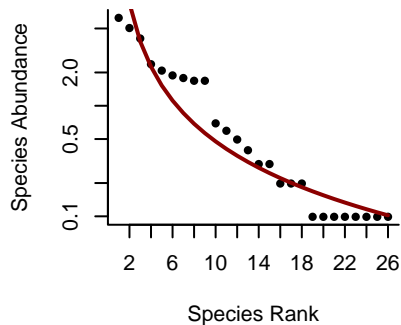**NSABHC0003-53598**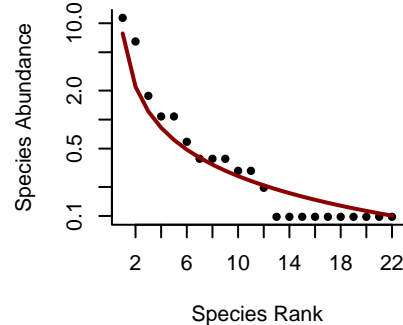**NSABHC0004-53599**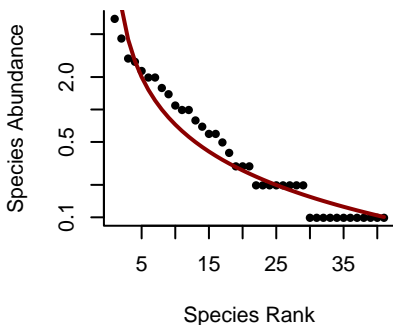**NSABHC0005-53600**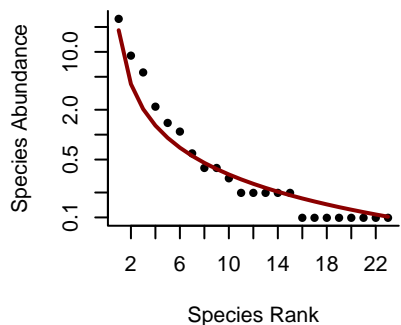**NSABHC0006-53601**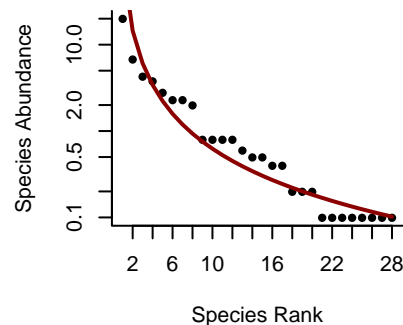**NSABHC0007-53602**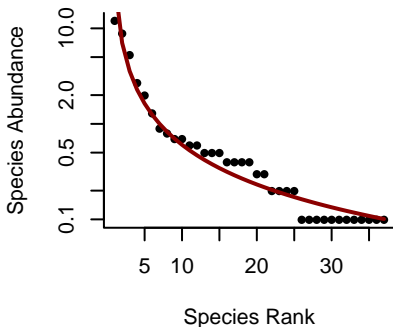**NSABHC0008-53603**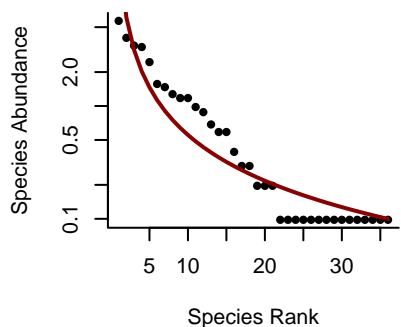**NSABHC0009-53604**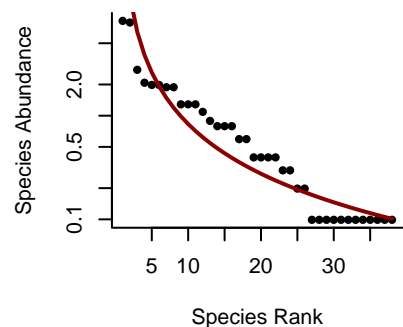

**NSABHC0010-53605**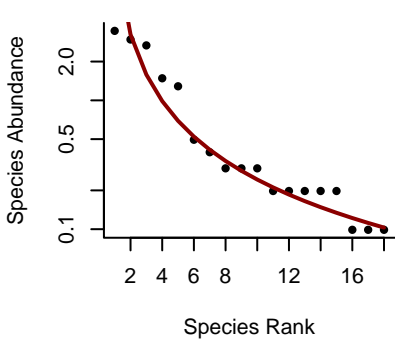**NSABHC0011-53606**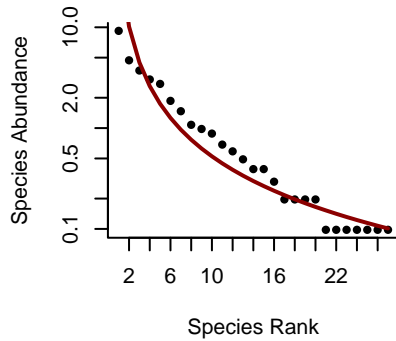**NSABHC0012-53607**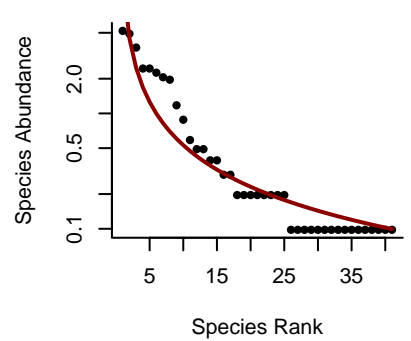**NSABHC0013-53608**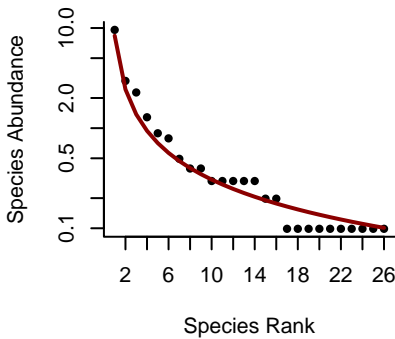**NSABHC0014-53609**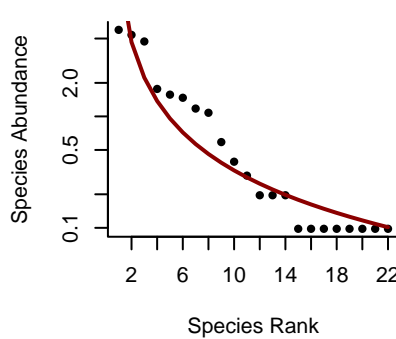**NSABHC0015-57104**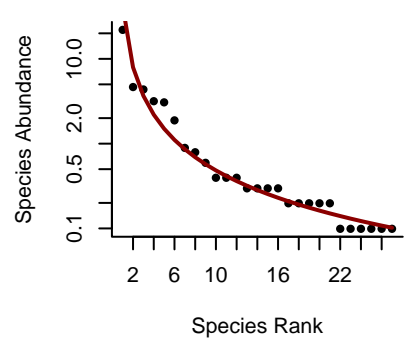**NSABHC0016-57105**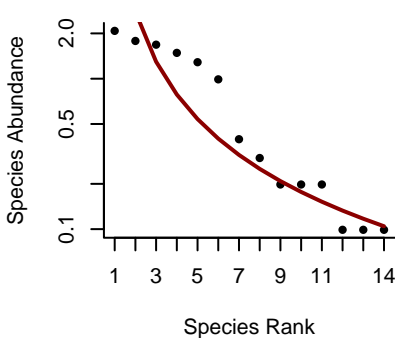**NSABHC0017-57106**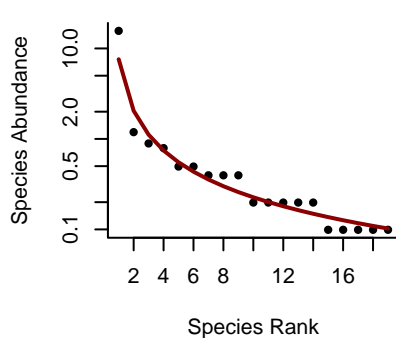**NSABHC0018-57077**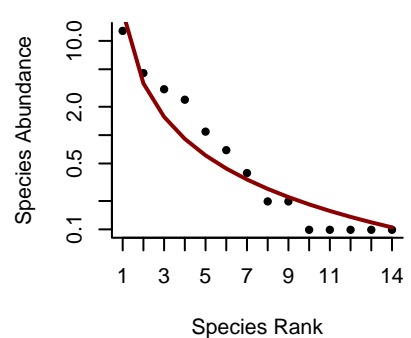

**NSABHC0019-57078**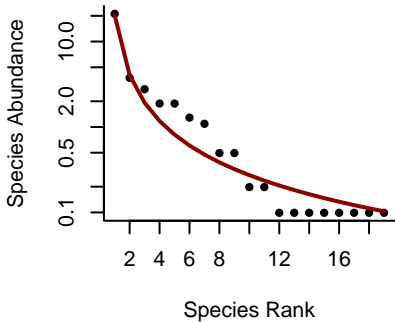**NSABHC0020-57599**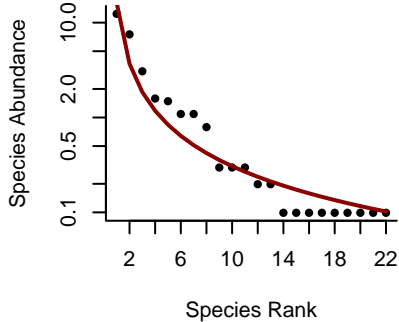**NSABHC0021-57098**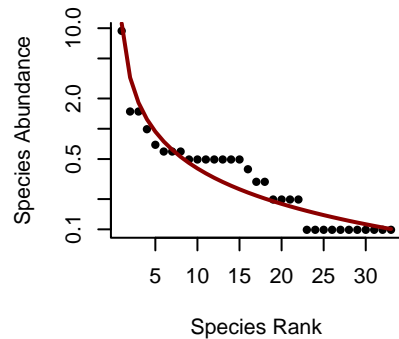**NSABHC0025-57101**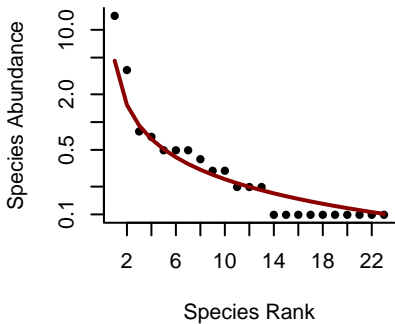**NSABHC0026-57102**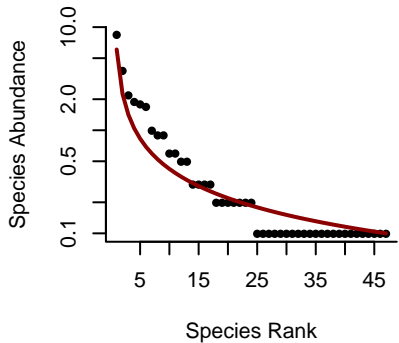**NSAMDD0001-56965**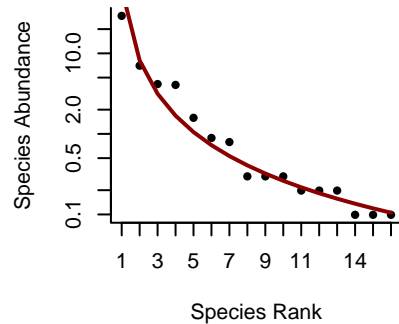**NSAMDD0002-56952**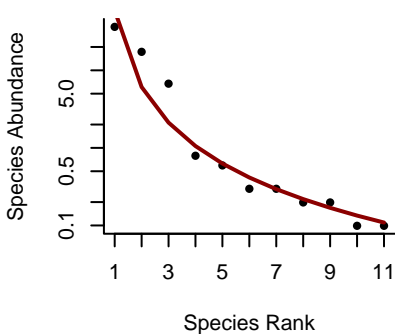**NSAMDD0003-56968**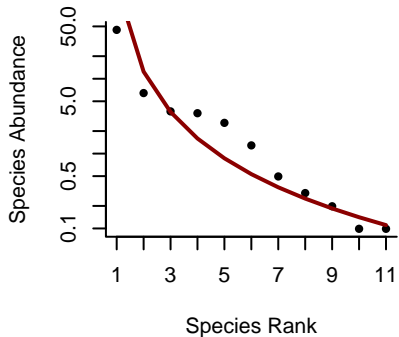**NSAMDD0004-56953**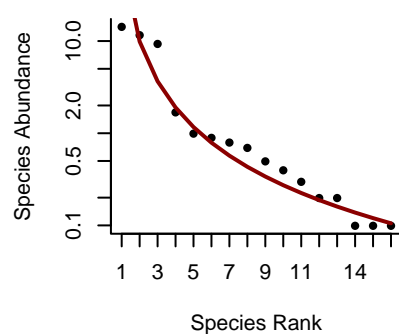

**NSAMDD0005-56969**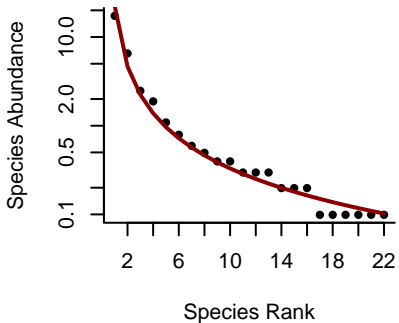**NSAMDD0006-56954**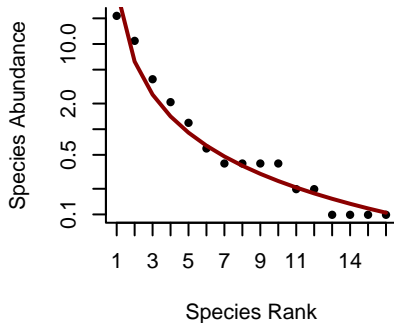**NSAMDD0007-56970**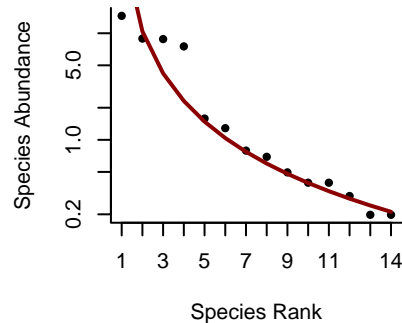**NSAMDD0008-56955**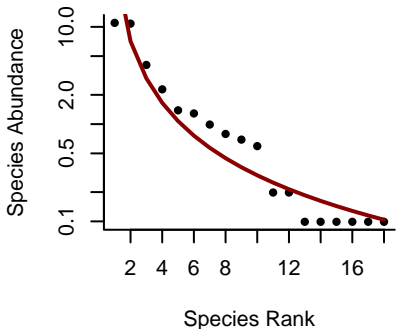**NSAMDD0009-56971**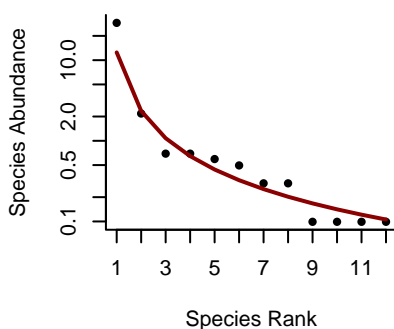**NSAMDD0010-56956**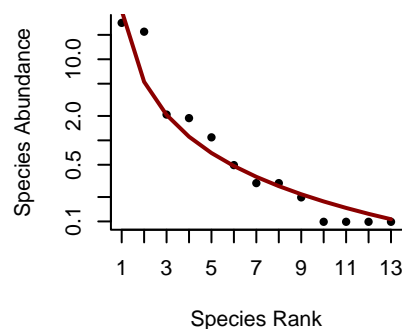**NSAMDD0011-56981**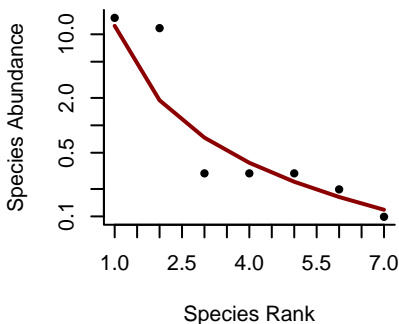**NSAMDD0013-56982**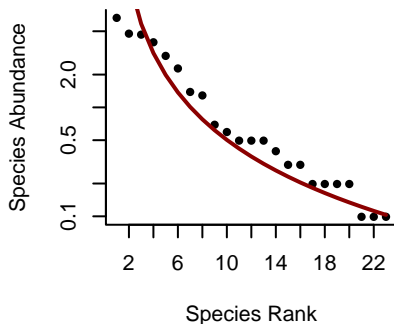**NSAMDD0014-56963**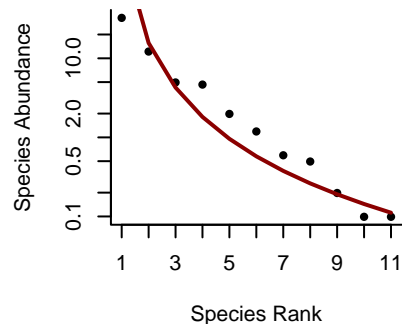

**NSAMDD0015-57636**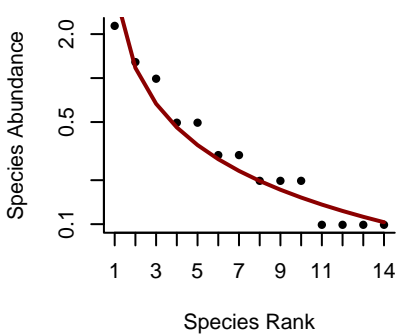**NSAMDD0016-56973**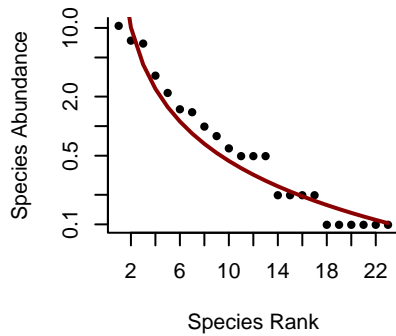**NSAMDD0017-57080**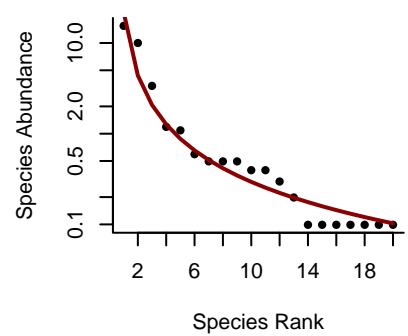**NSAMDD0018-56976**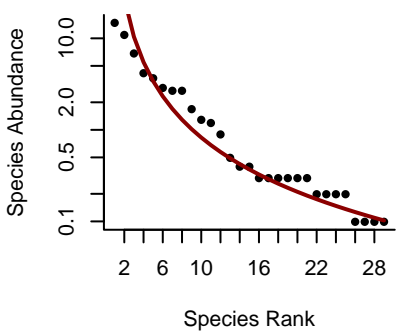**NSAMDD0019-57081**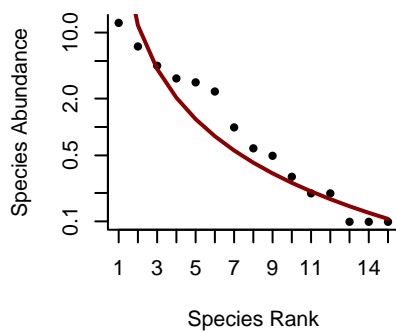**NSAMDD0020-56984**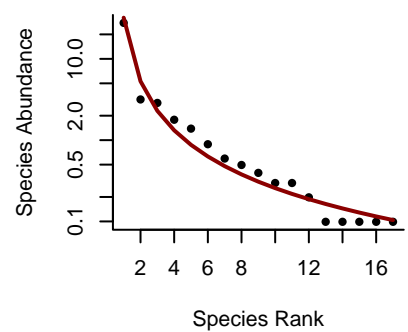**NSAMDD0021-57082**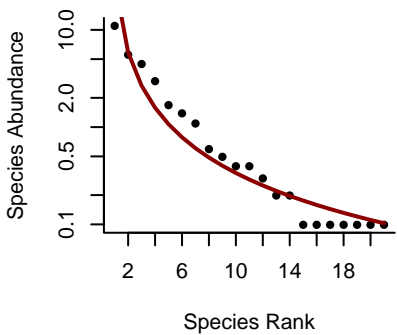**NSAMDD0022-56985**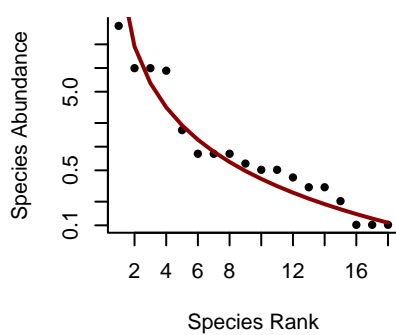**NSAMDD0023-57083**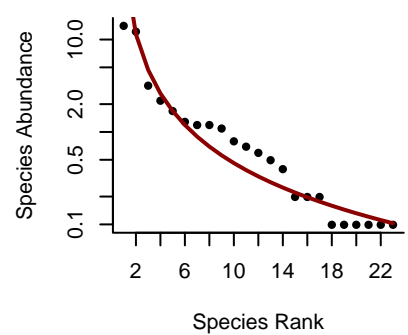

**NSAMDD0024-56986**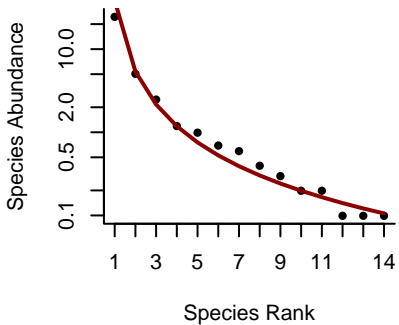**NSAMDD0025-57084**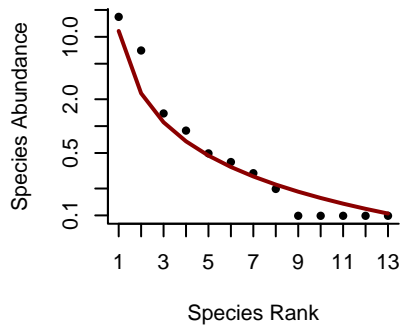**NSAMDD0026-56987**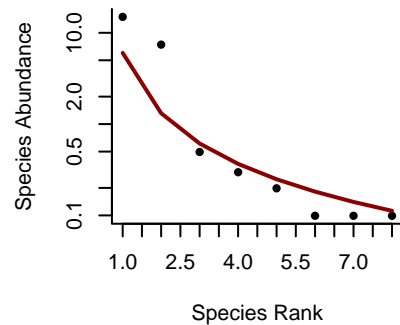**NSAMDD0027-57087**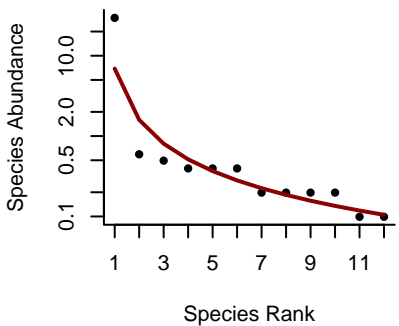**NSAMDD0028-56988**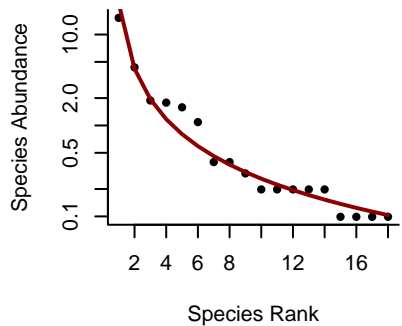**NSAMDD0029-57088**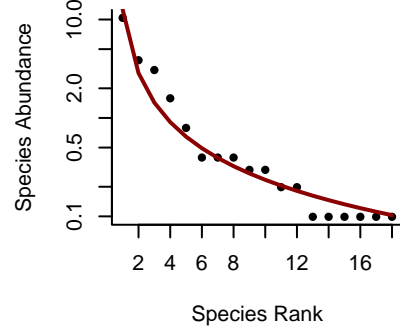**NSAMDD0030-56989**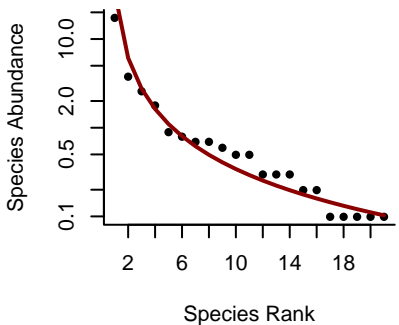**NTABRT0001-53616**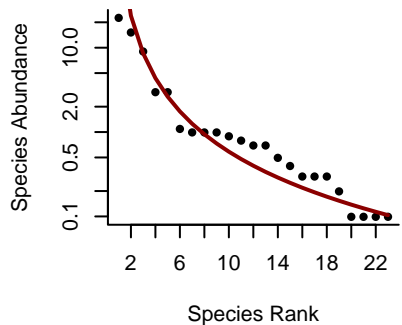**NTABRT0002-53617**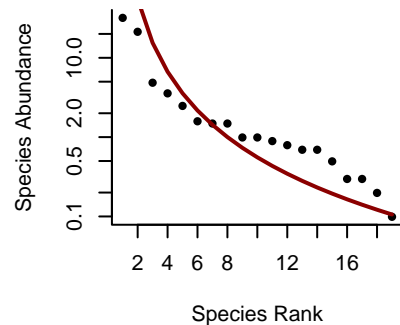

**NTABRT0003-53618**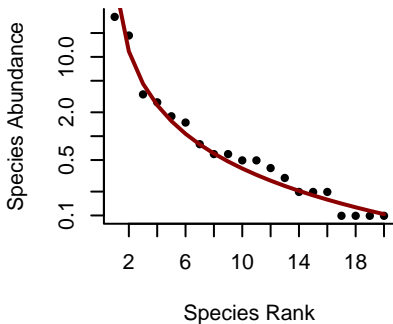**NTABRT0004-53619**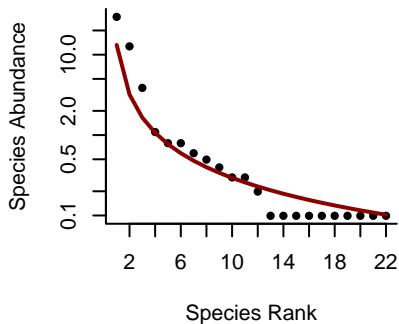**NTABRT0005-53620**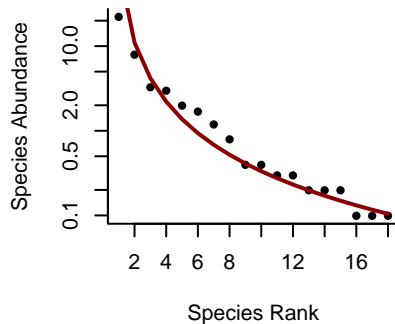**NTABRT0006-53621**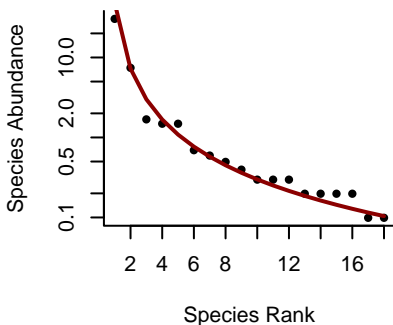**NTADAC0001-53518**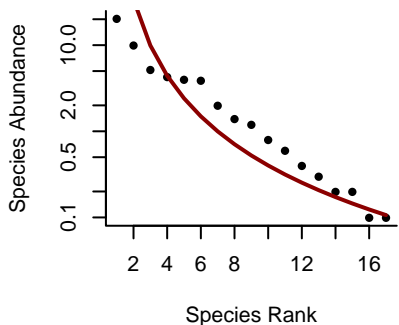**NTAFIN0001-53519**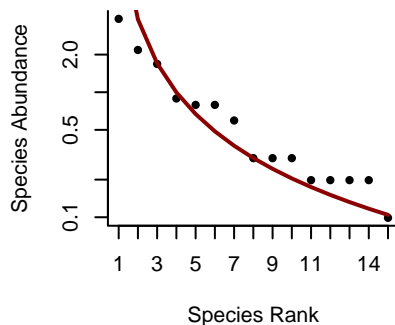**NTAFIN0002-53622**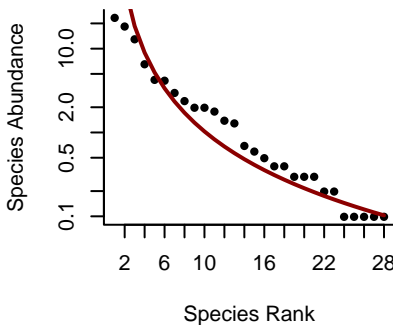**NTAFIN0003-53623**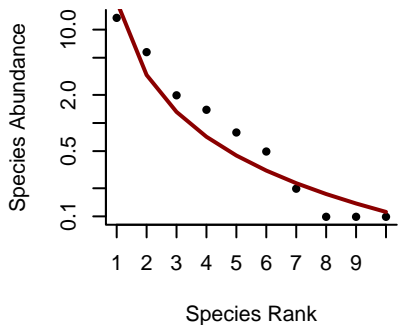**NTAFIN0004-53624**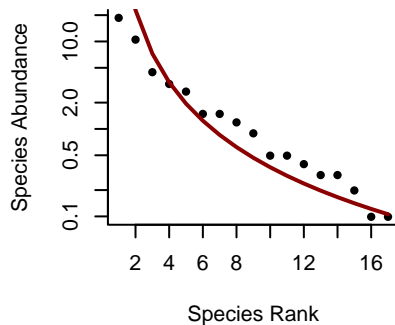

**NTAFIN0005-53625**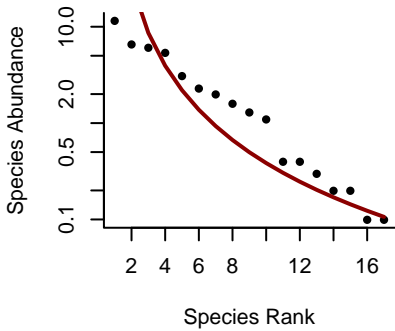**NTAFIN0007-53627**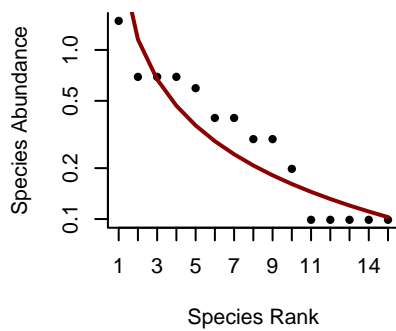**NTAFIN0009-53629**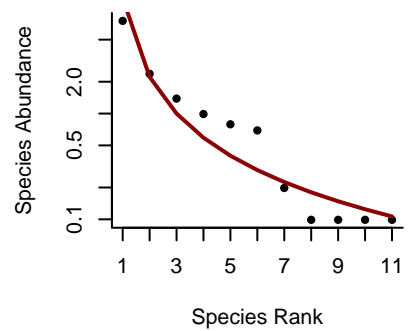**NTAFIN0010-53630**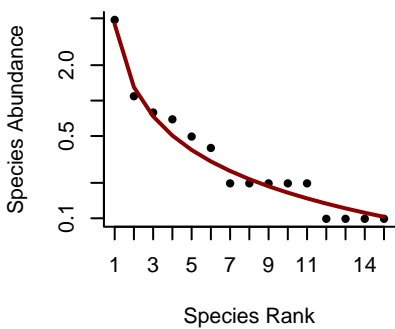**NTAFIN0011-53631**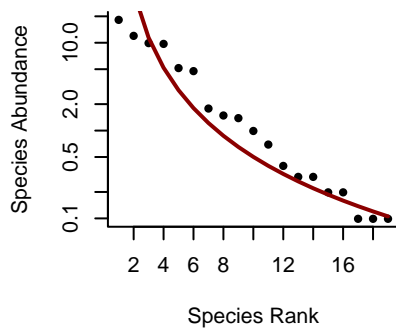**NTAFIN0012-53632**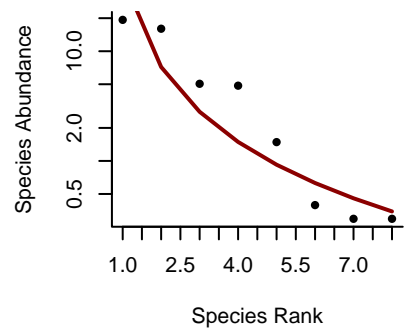**NTAFIN0013-53633**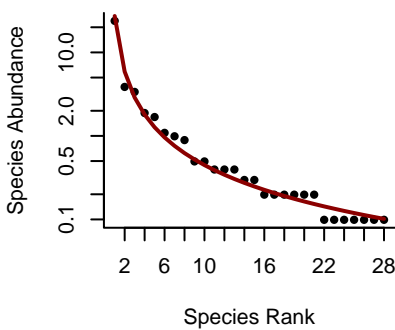**NTAFIN0014-53634**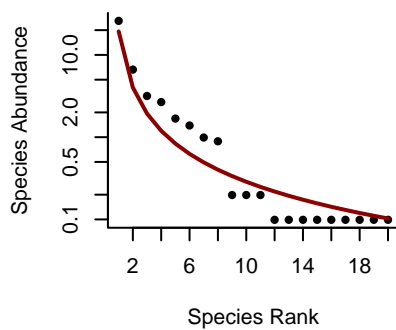**NTAFIN0015-53635**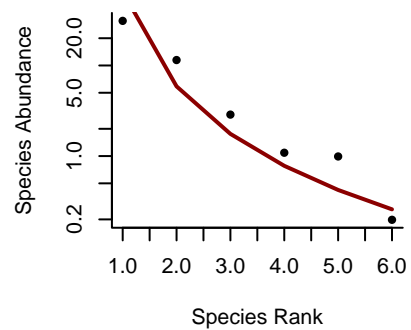



**NTAFIN0016-53636**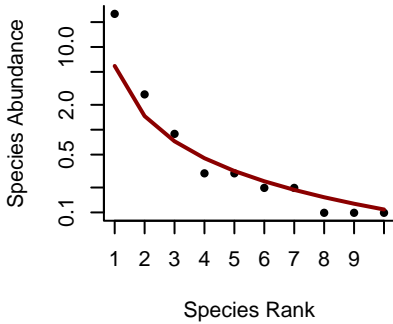**NTAFIN0017-53637**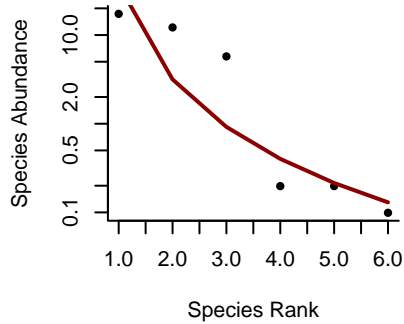**NTAFIN0018-53638**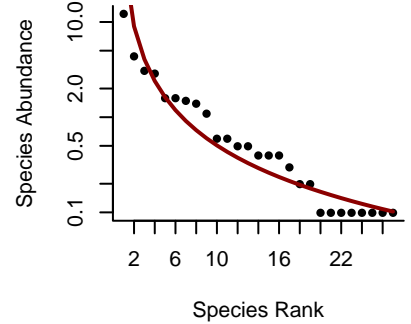**NTAFIN0019-53639**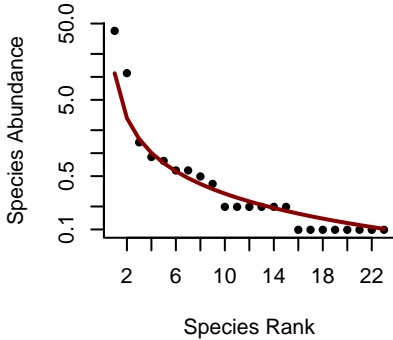**NTAFIN0020-53640**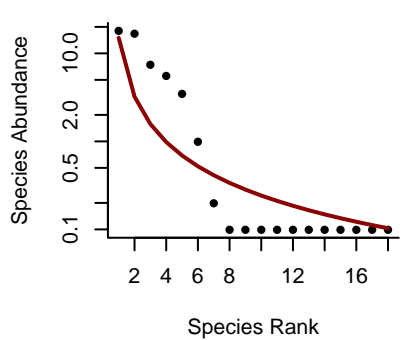**NTAFIN0021-53641**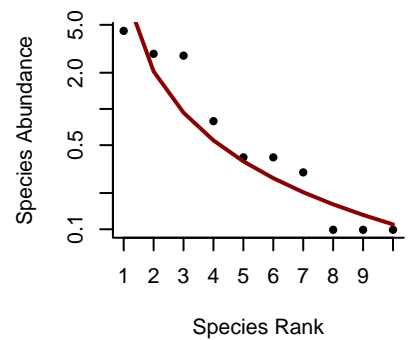**NTAFIN0022-53642**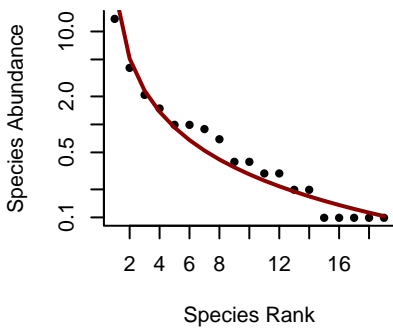**NTAFIN0023-53643**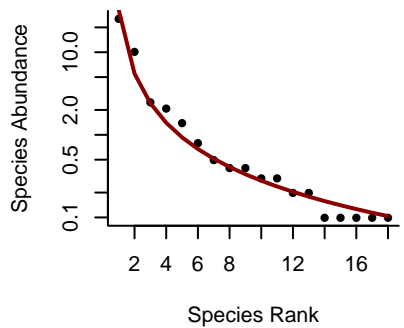**NTAFIN0024-53644**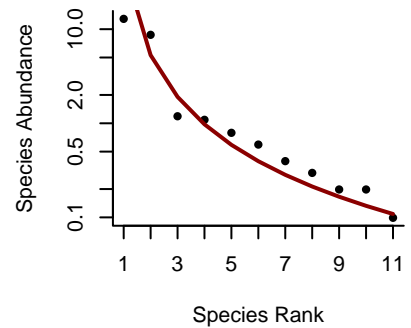

**NTAFIN0025-53645**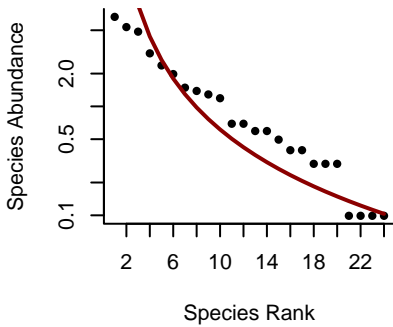**NTAFIN0026-53646**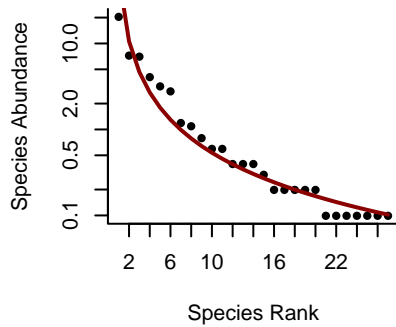**NTAFIN0027-53647**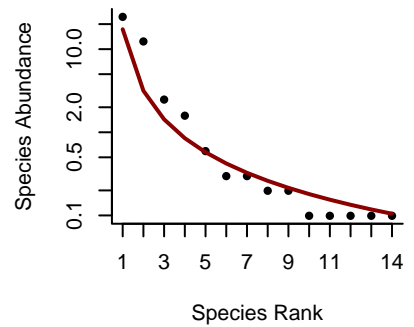**NTAFIN0028-53746**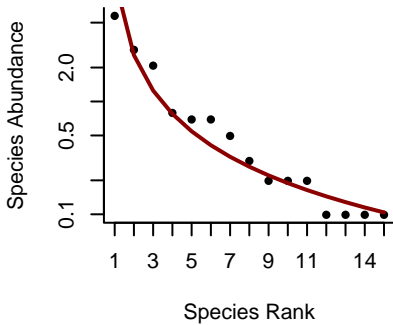**NTAFIN0029-53747**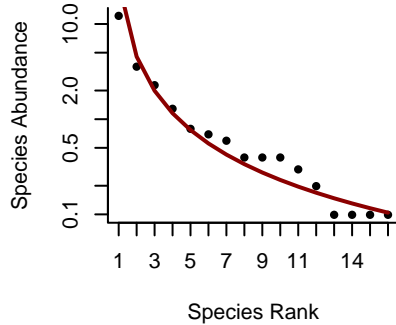**NTAFIN0030-53748**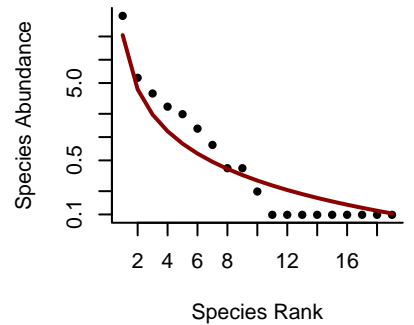**NTAFIN0031-53749**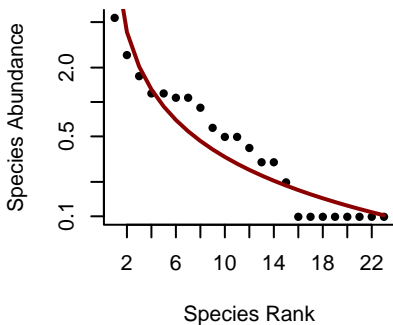**NTAFIN0032-53750**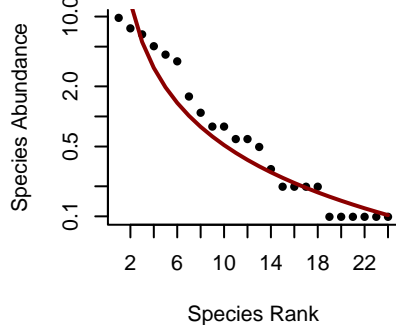**NTAFIN0033-53751**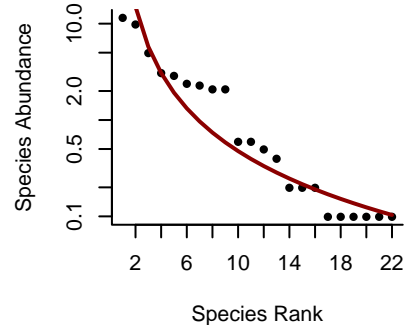

**NTAGFU0001-53648**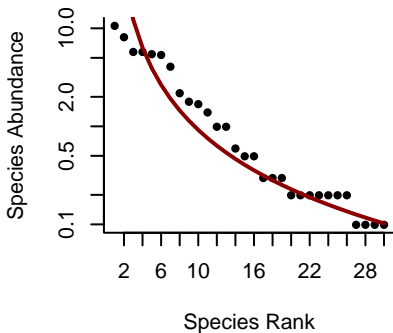**NTAGFU0002-53649**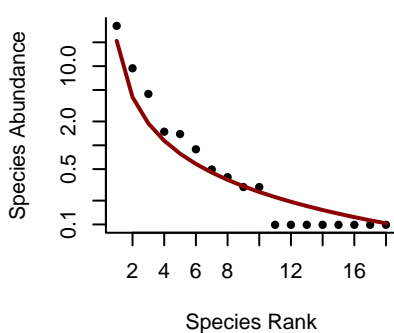**NTAGFU0003-53650**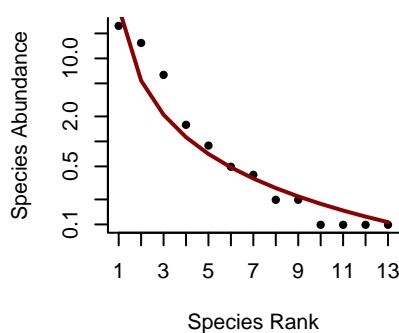**NTAGFU0004-53651**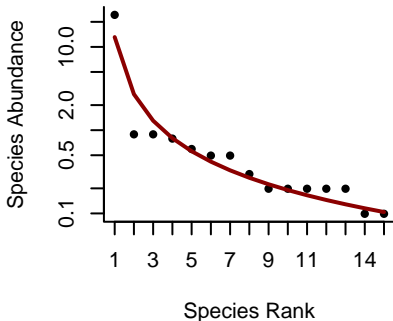**NTAGFU0005-53652**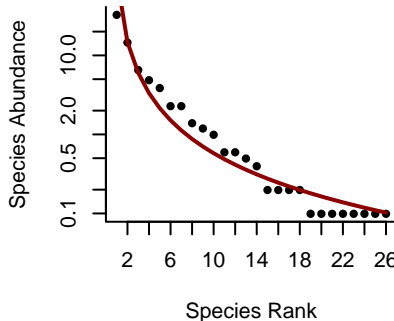**NTAGFU0006-53653**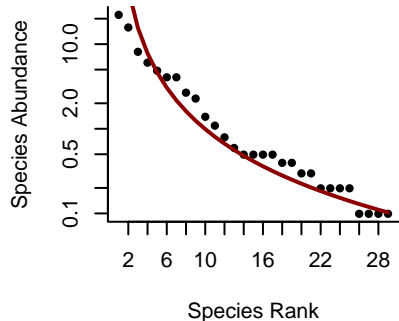**NTAGFU0007-53654**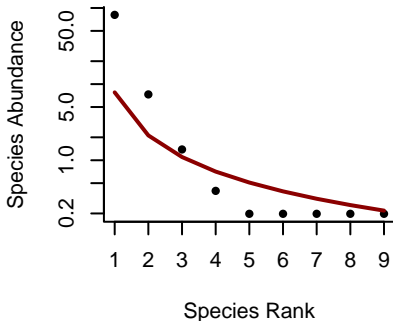**NTAGFU0008-53655**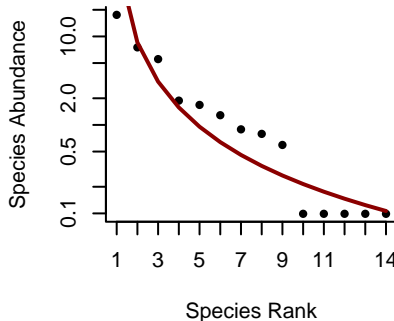**NTAGFU0009-53656**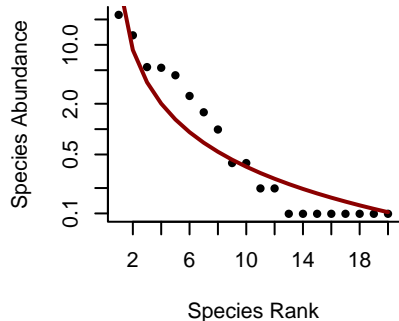

**NTAGFU0010-53657**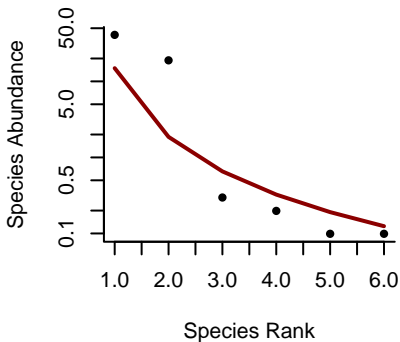**NTAGFU0011-53658**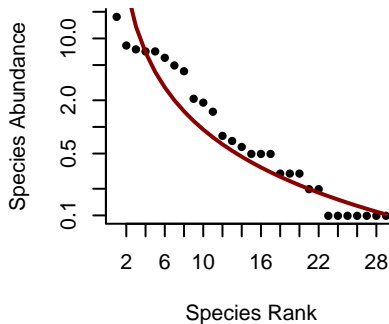**NTAGFU0012-53659**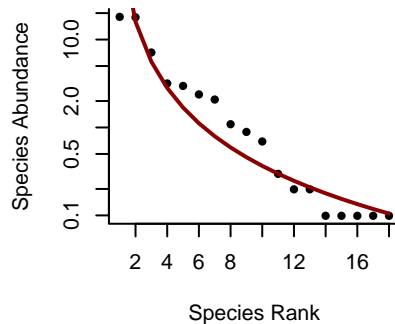**NTAGFU0013-53660**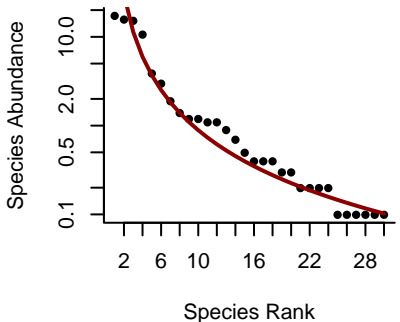**NTAGFU0014-53661**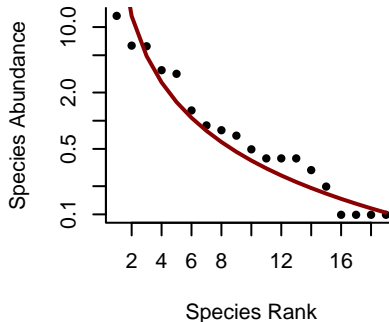**NTAGFU0015-53662**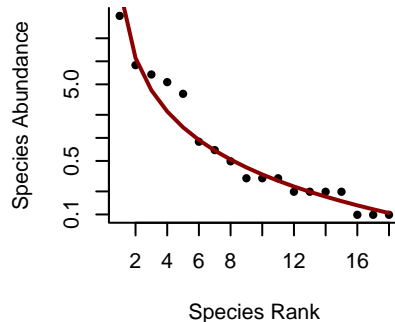**NTAGFU0016-53663**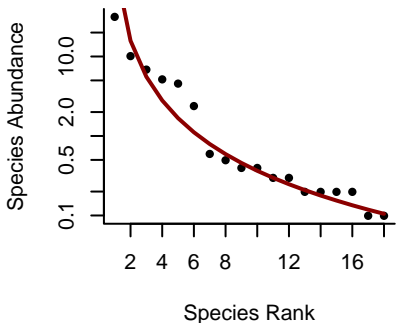**NTAGFU0017-53664**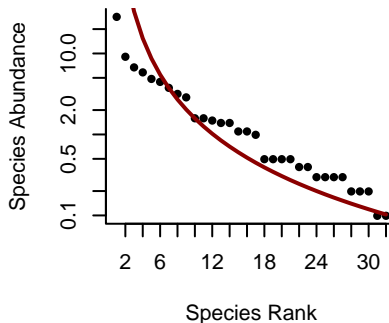**NTAGFU0018-53665**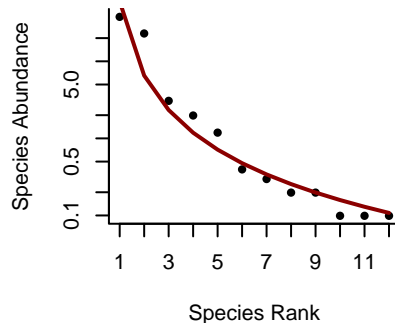

**NTAGFU0019-53666**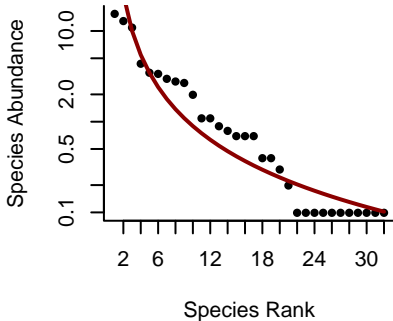**NTAGFU0020-53667**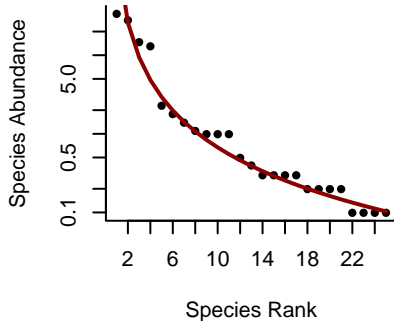**NTAGFU0021-53668**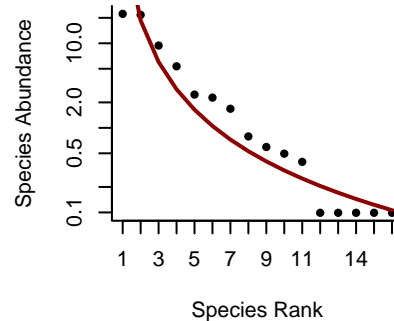**NTAGFU0022-53669**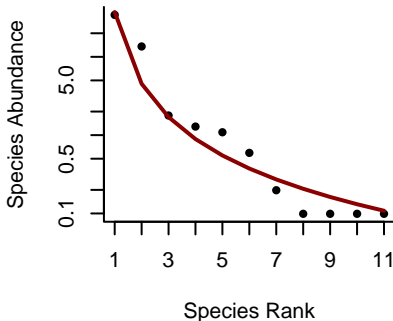**NTAGFU0023-53670**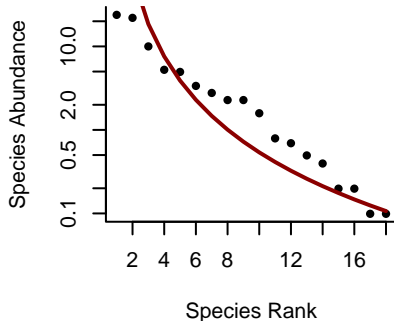**NTAGFU0024-53671**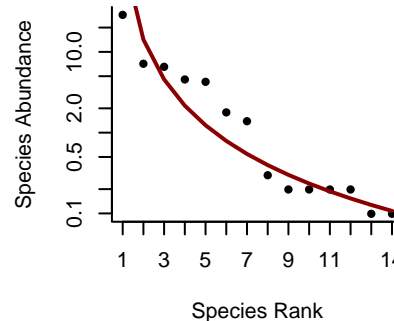**NTAGFU0025-53672**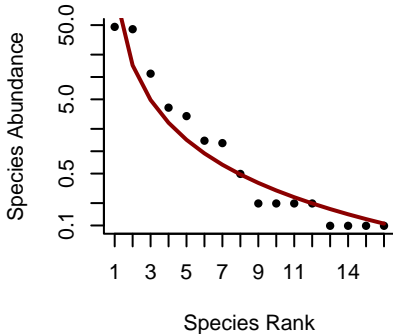**NTAGFU0026-53673**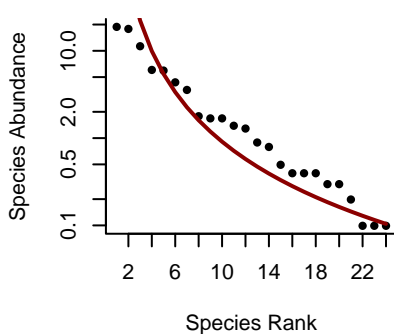**NTAGFU0027-53674**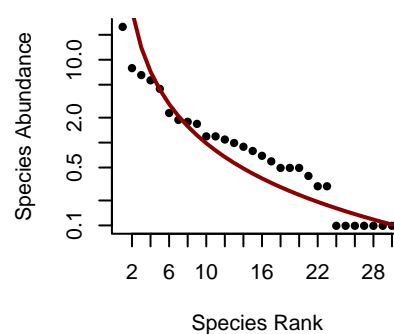

**NTAGFU0028-53675**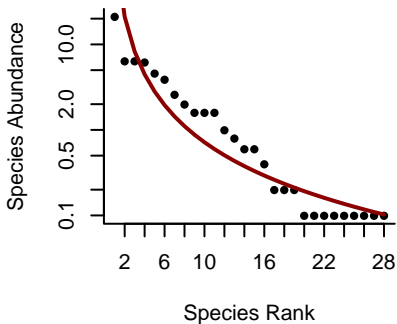**NTAGFU0029-53676**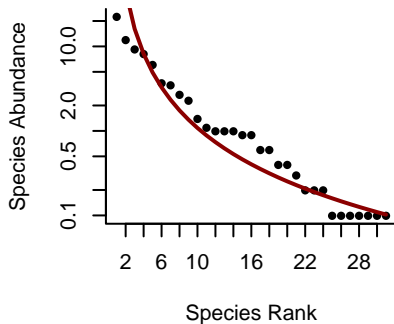**NTAGFU0030-53677**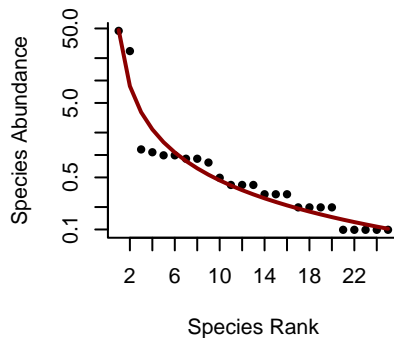**NTAGFU0031-53678**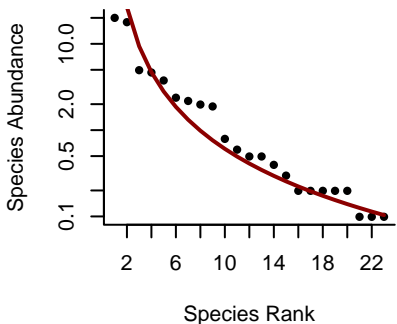**NTAGFU0032-53679**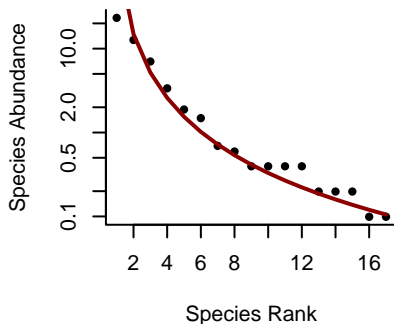**NTAGFU0033-53680**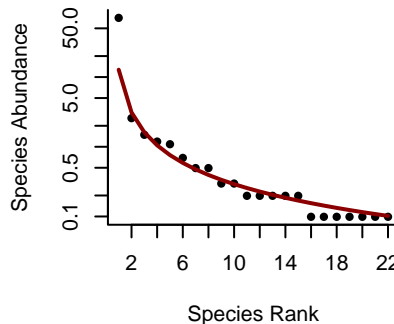**NTAGFU0034-53681**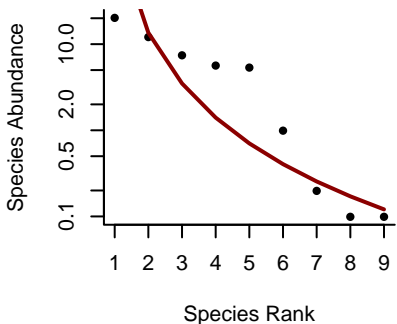**NTAGFU0035-53682**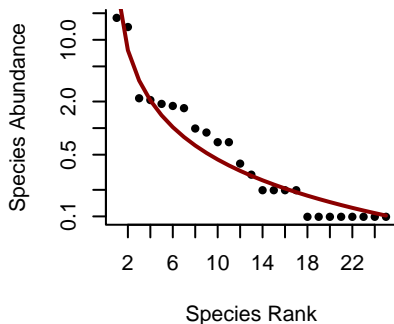**NTAGFU0036-53683**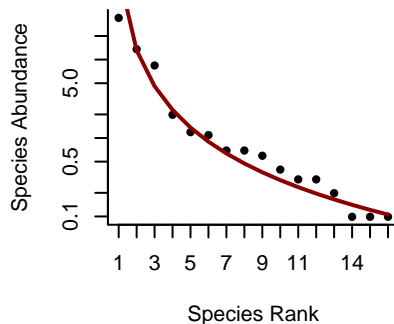

**NTAGFU0037-53684**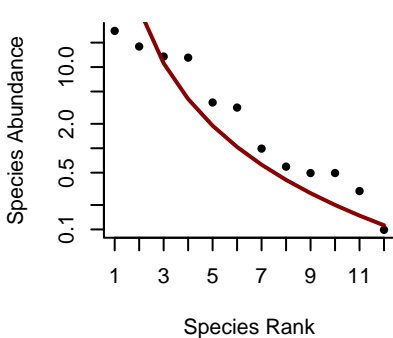**NTAGFU0038-53685**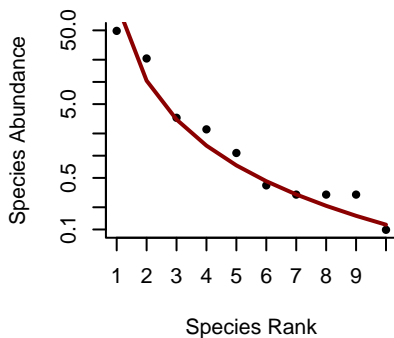**NTAGFU0039-53686**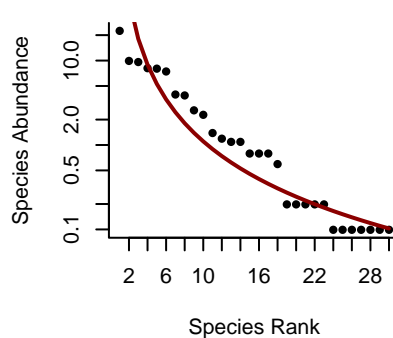**NTAGFU0040-53687**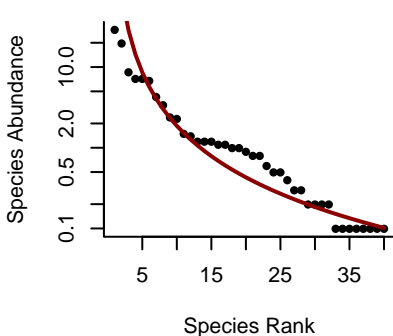**NTAMAC0001-53574**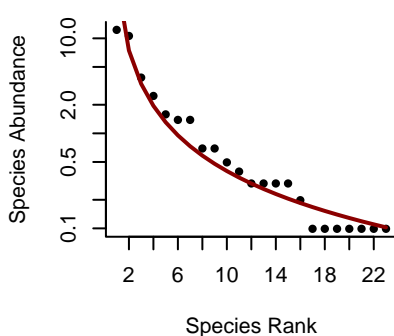**NTAMAC0002-53575**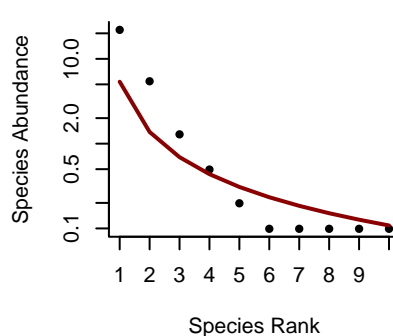**NTAMAC0003-53576**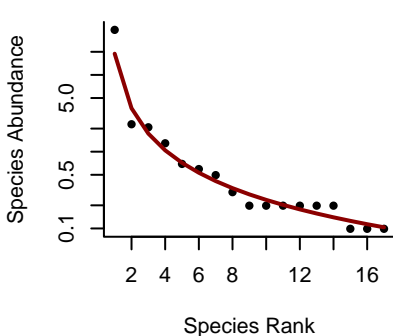**NTAMGD0001-53520**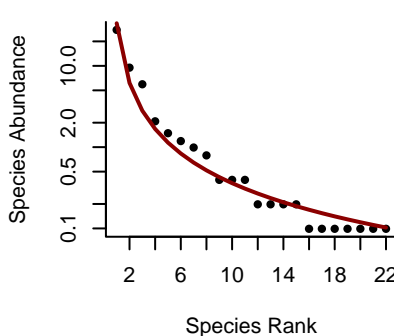**NTAMGD0002-53466**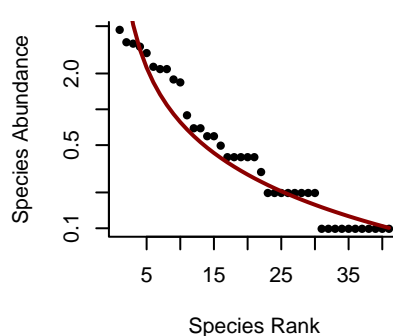

**NTASSD0001-53690**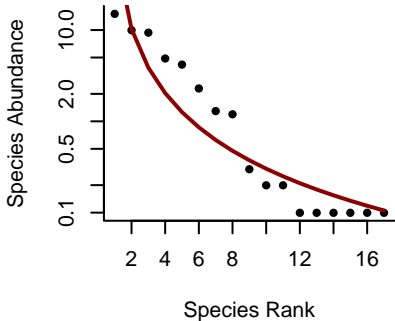**NTASSD0003-53691**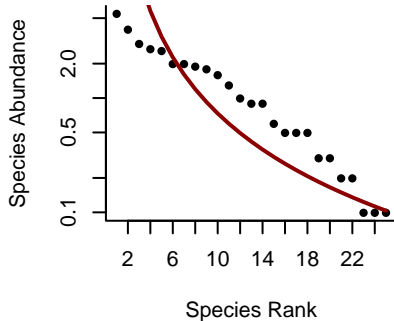**NTASSD0004-53692**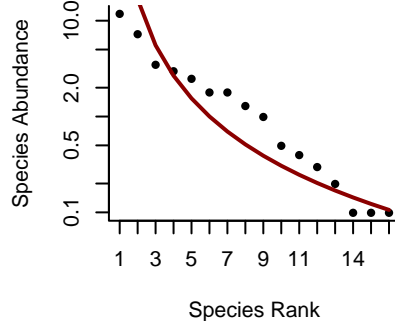**NTASSD0005-53693**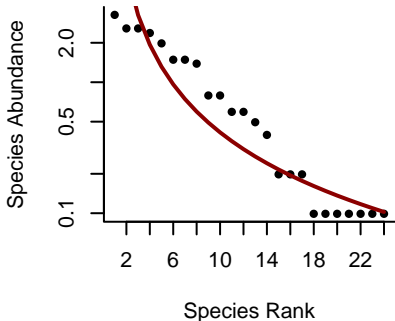**NTASSD0006-53694**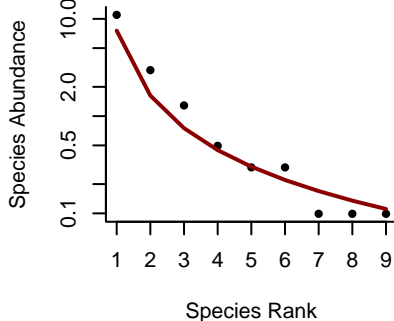**NTASSD0007-53695**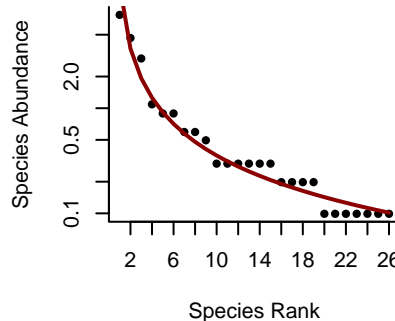**NTASSD0009-53696**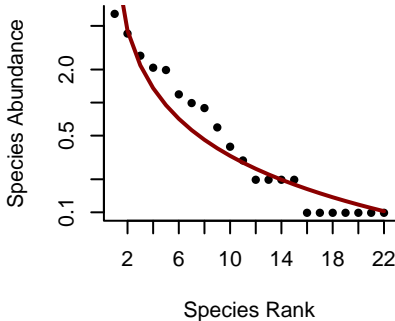**NTASSD0010-53697**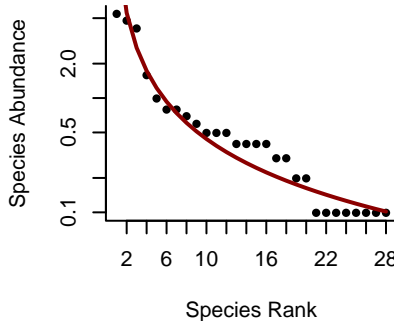**NTASSD0012-53560**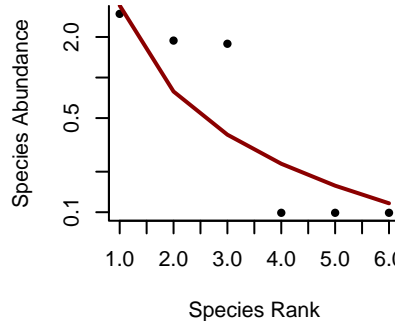



**NTASSD0015-53565**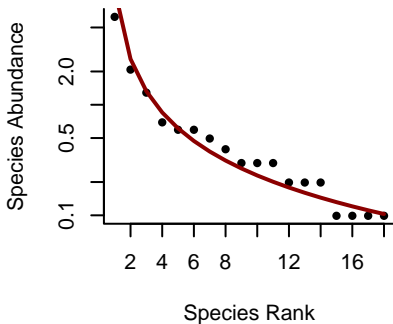**NTASSD0016-53566**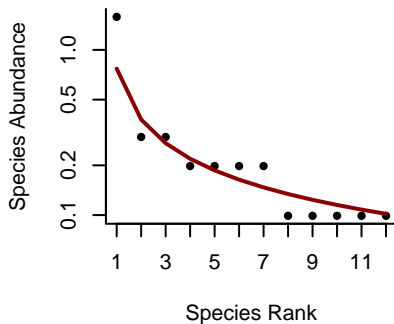**NTASSD0017-53561**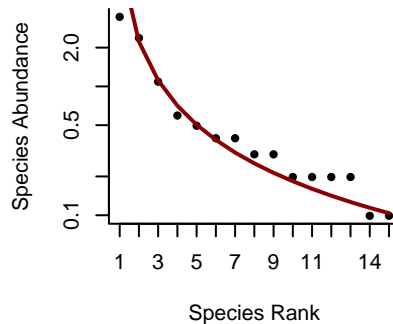**NTASSD0018-53562**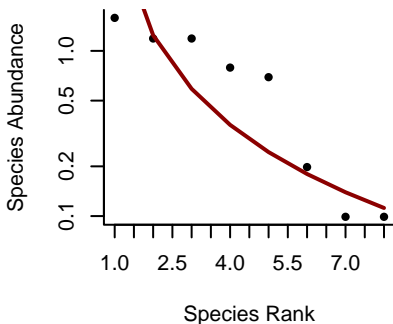**NTASSD0019-53567**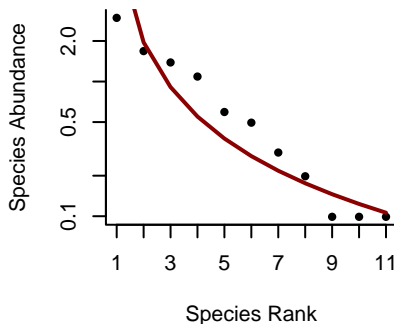**NTTDAB0001-53580**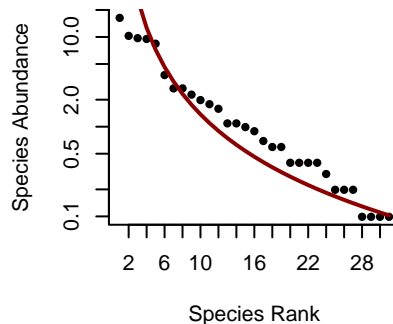**NTTDAC0001-53755**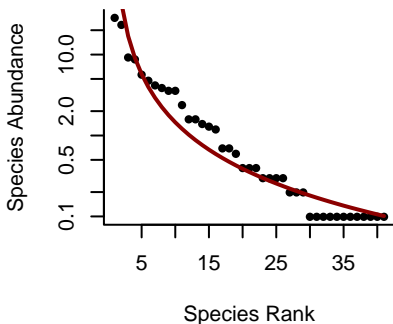**NTTDMR0001-53582**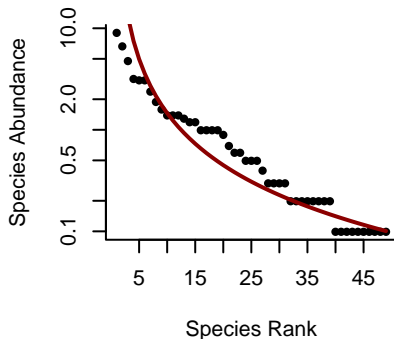**NTTDMR0002-53581**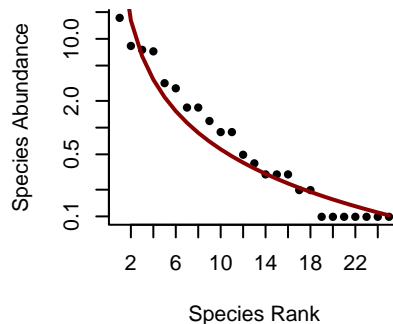

**NTTDMR0003-53583**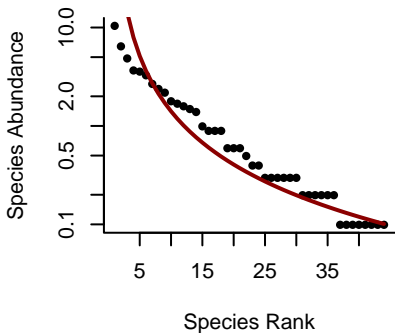**NTTMGD0001-53521**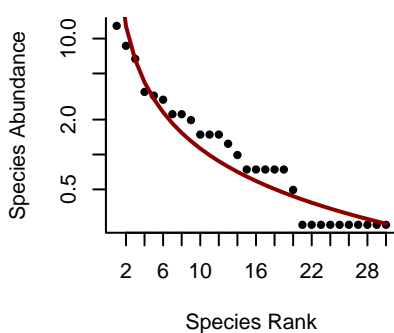**NTTPCK0001-53584**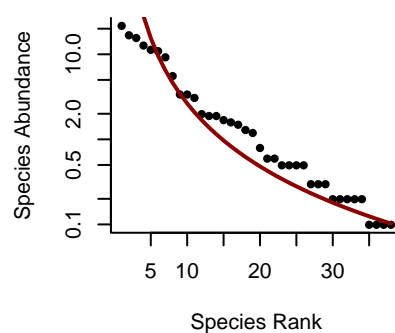**NTTSTU0001-53585**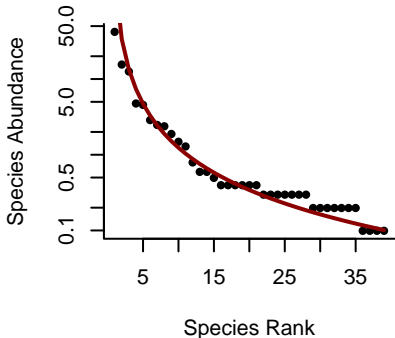**QDACHC0002-53593**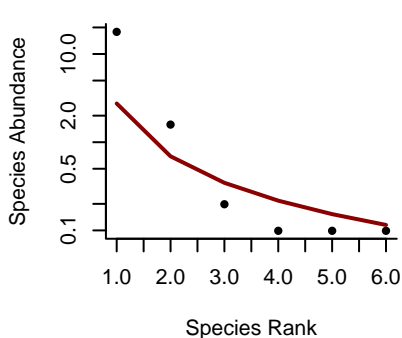**QDACHC0003-53467**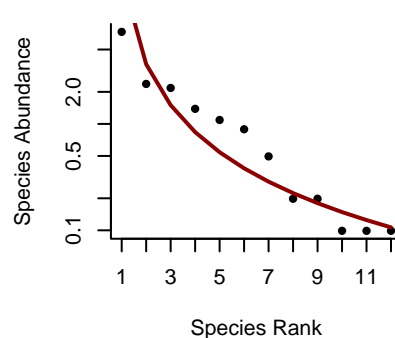**QDACHC0004-53468**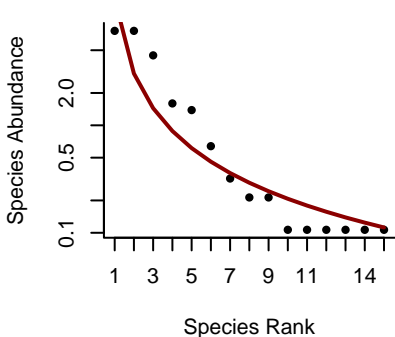**QDACHC0005-53522**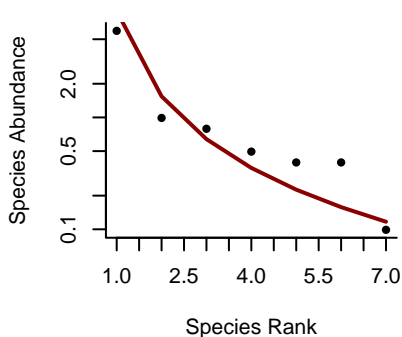**QDACHC0006-53469**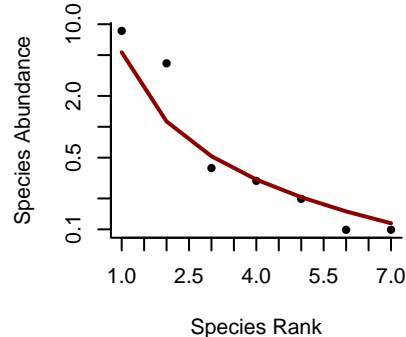

**QDAEIU0001-53470**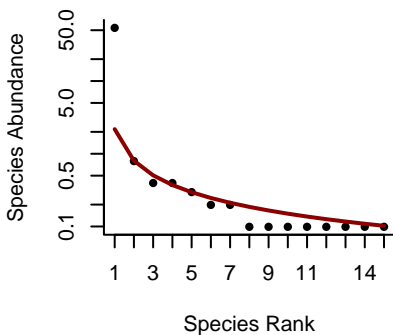**QDAEIU0002-53523**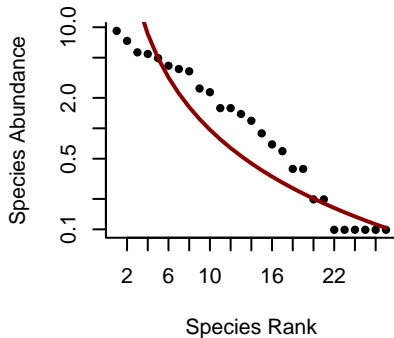**QDAEIU0003-53471**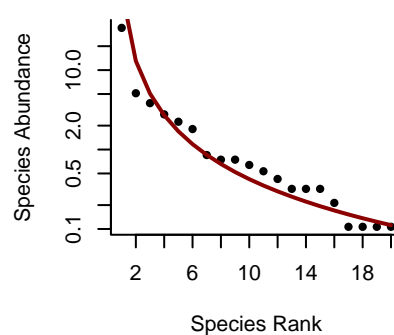**QDAEIU0004-53524**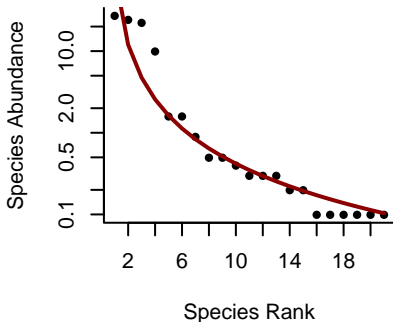**QDAEIU0006-53473**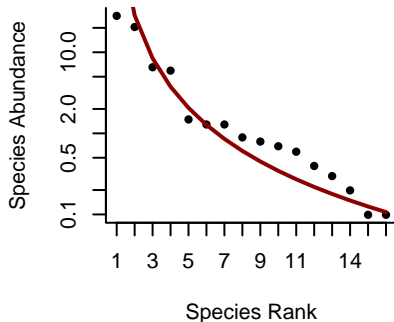**QDAEIU0007-53474**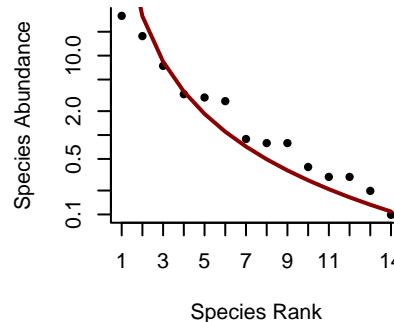**QDAGUP0001-53526**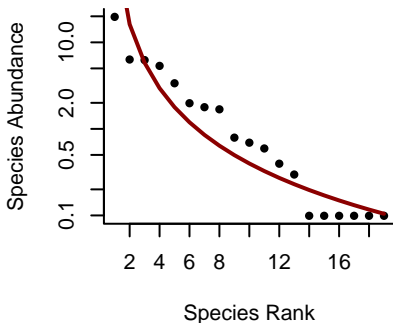**QDAGUP0002-53475**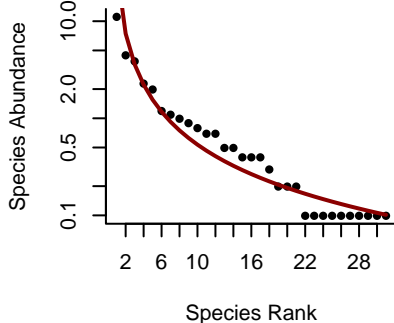**QDAGUP0003-53527**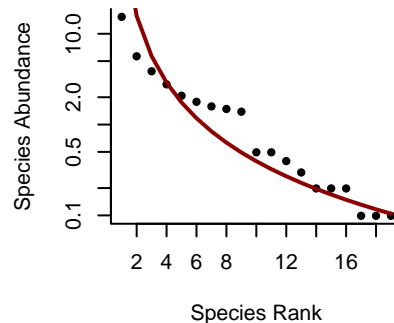

**QDAGUP0004-53476**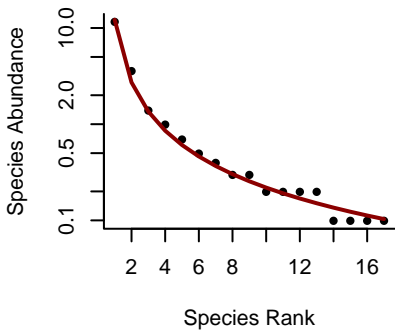**QDAGUP0005-53528**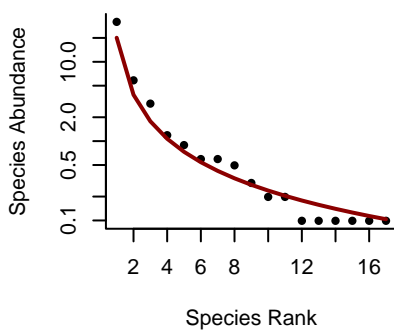**QDAGUP0006-53477**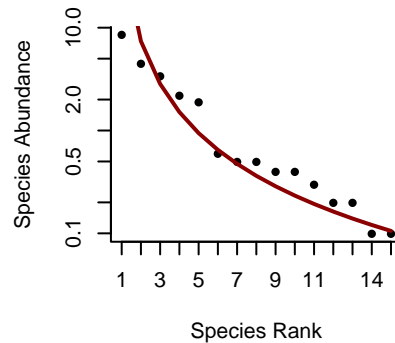**QDAGUP0007-53478**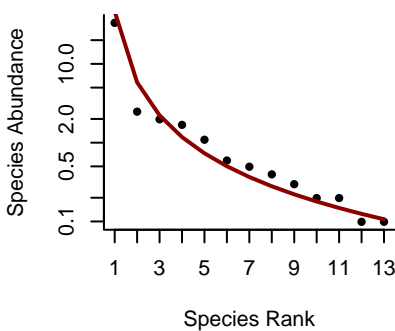**QDAGUP0008-53529**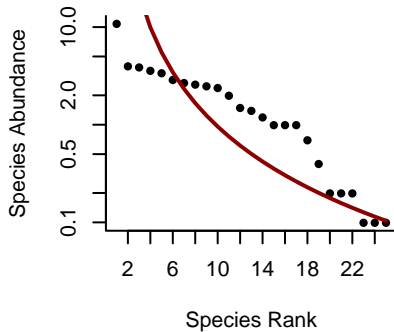**QDAGUP0009-53530**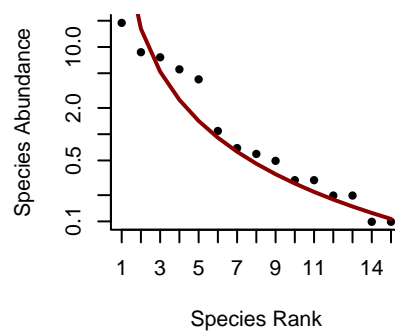**QDAGUP0010-53479**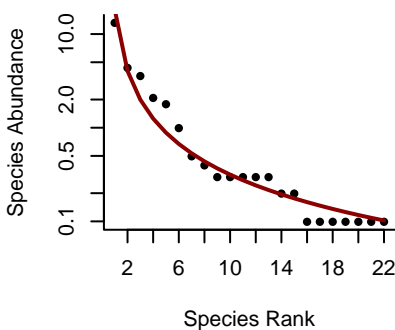**QDAGUP0011-53531**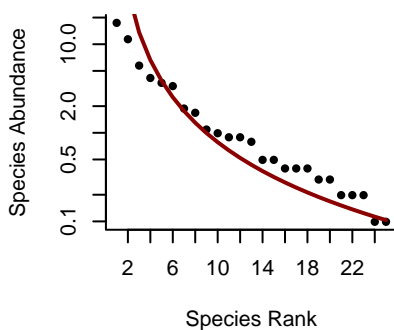**QDAGUP0012-53525**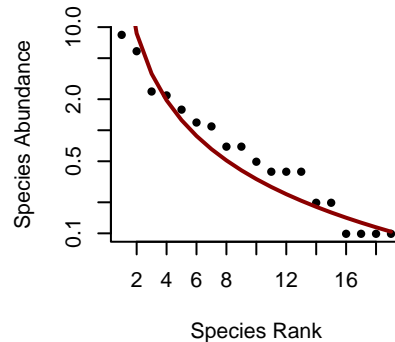

**QDAGUP0013-53532**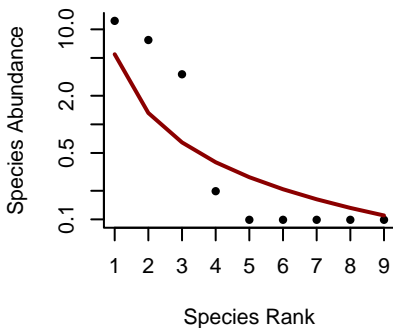**QDAGUP0014-53480**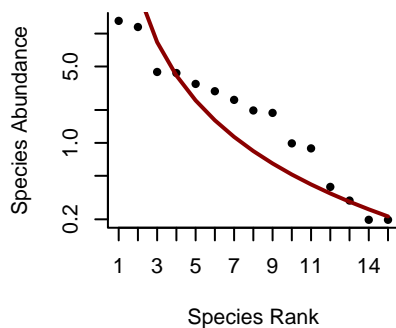**QDAGUP0015-53533**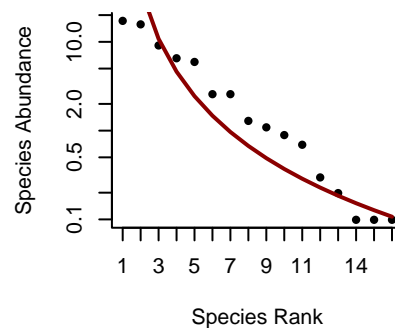**QDAGUP0016-53481**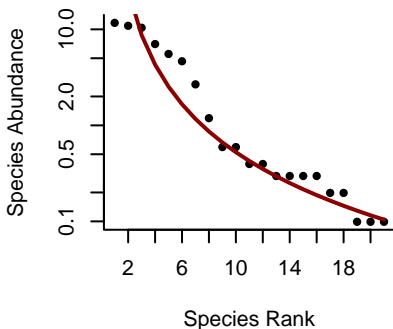**QDAGUP0017-53568**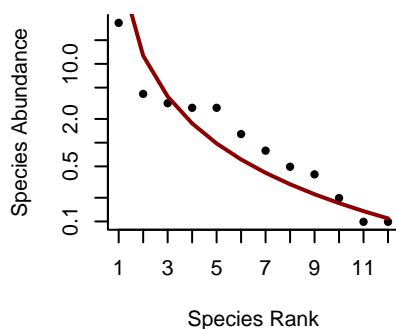**QDAGUP0018-53482**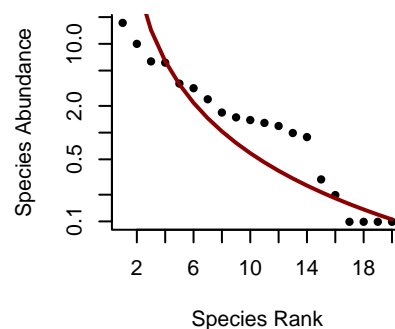**QDAGUP0019-53534**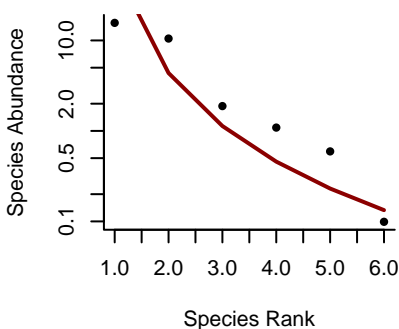**QDAGUP0020-53483**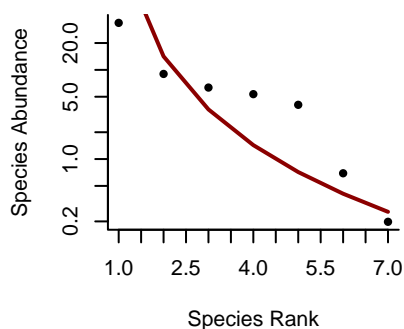**QDAGUP0021-53535**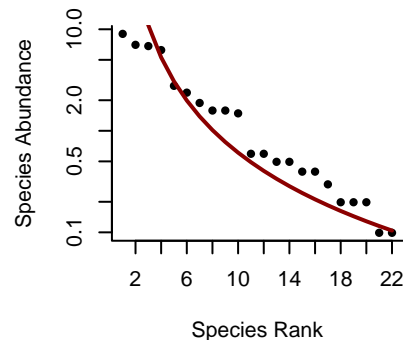

**QDAGUP0022-53484**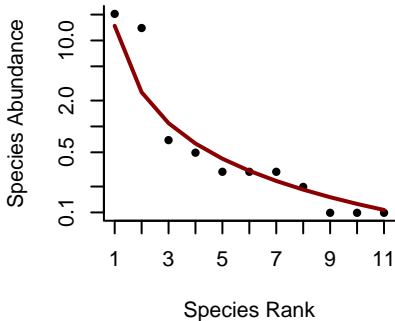**QDAGUP0023-53536**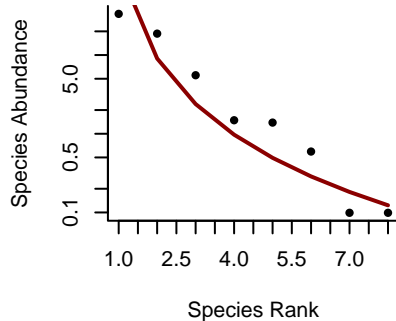**QDAGUP0025-53537**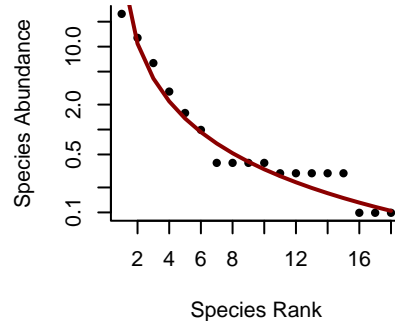**QDAGUP0026-53486**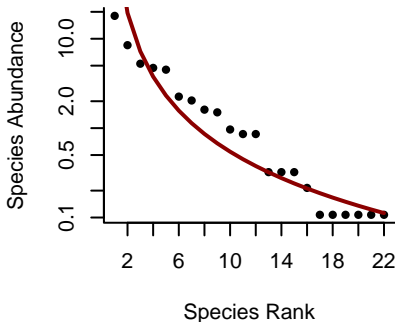**QDAGUP0027-53538**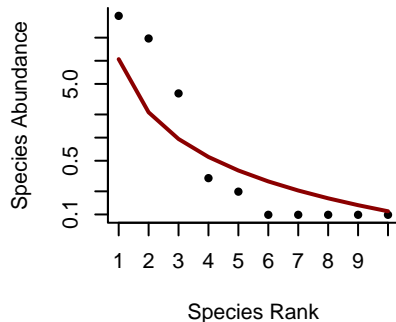**QDAGUP0028-53487**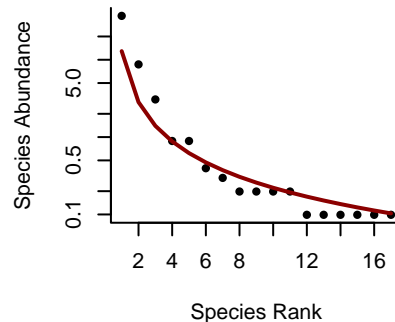**QDAGUP0029-53488**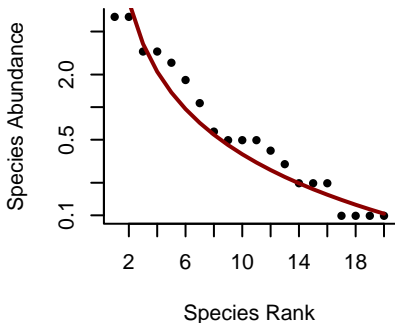**QDAGUP0030-53489**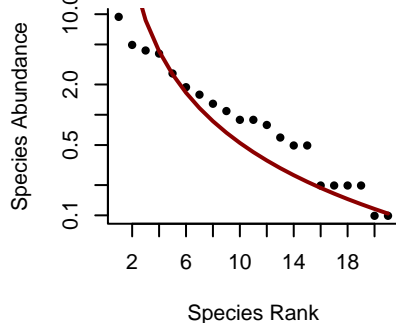**QDAGUP0031-53490**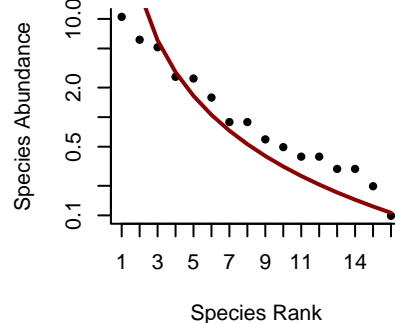

**QDAMGD0001-53586**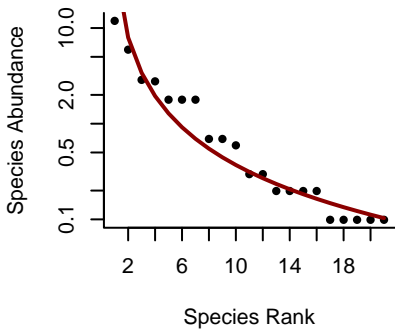**QDAMGD0002-53587**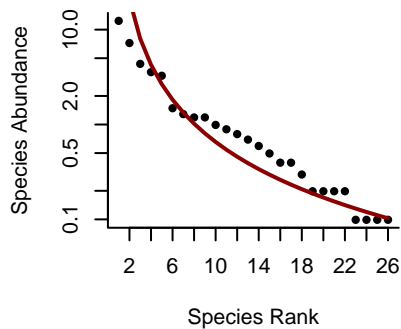**QDAMGD0003-53491**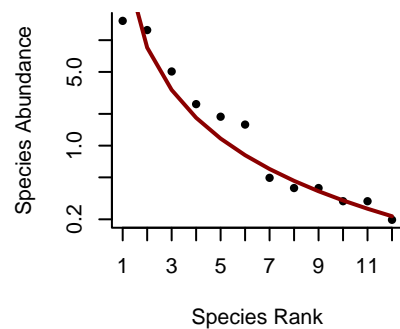**QDAMGD0004-53588**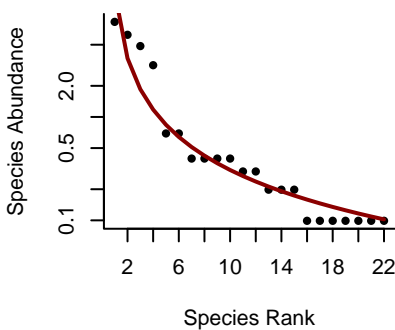**QDAMGD0005-53589**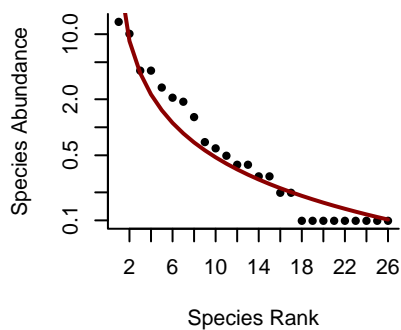**QDAMGD0006-53492**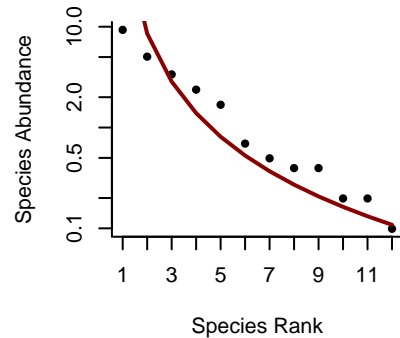**QDAMGD0007-53590**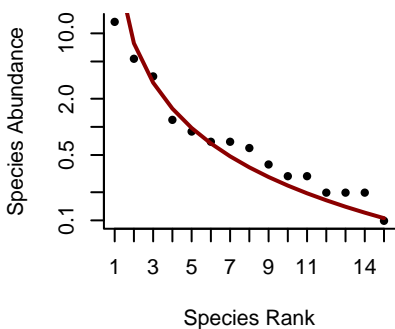**QDAMGD0008-53493**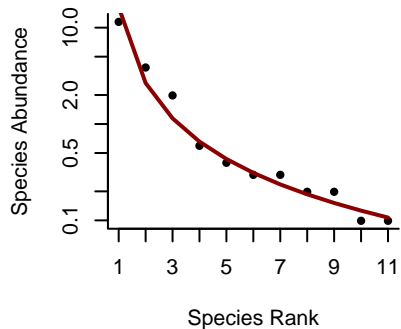**QDAMGD0009-53494**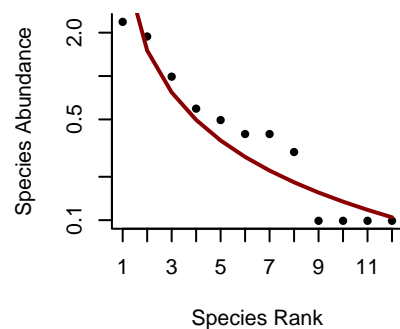

**QDAMGD0010-53591**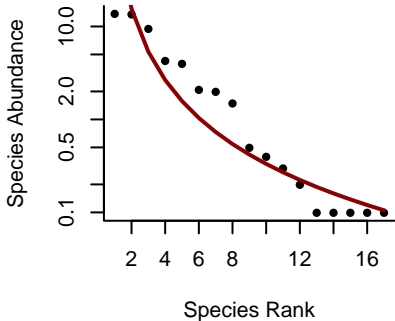**QDAMGD0012-53496**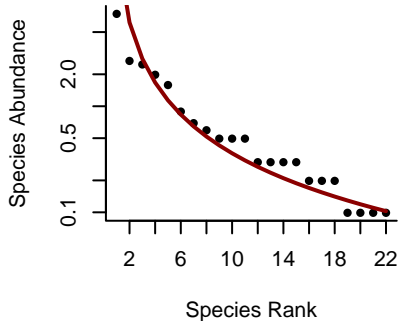**QDAMGD0013-53539**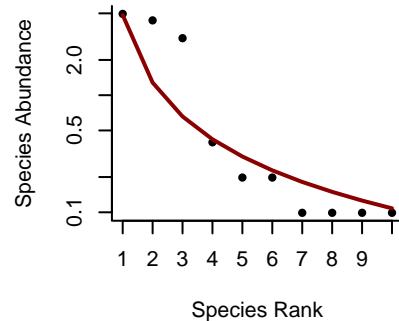**QDAMGD0014-53497**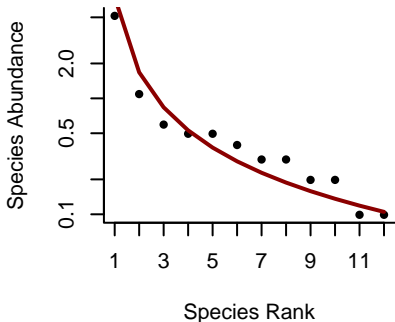**QDAMGD0015-53540**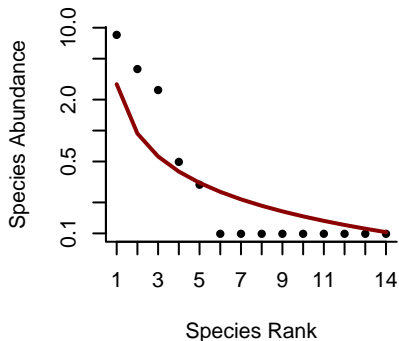**QDAMGD0016-53498**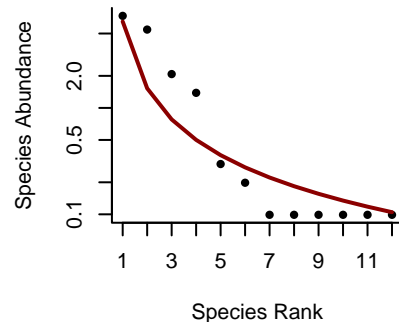**QDAMGD0017-53499**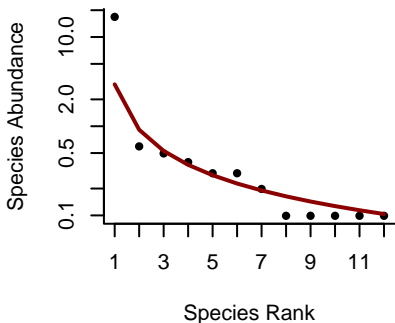**QDAMGD0018-53541**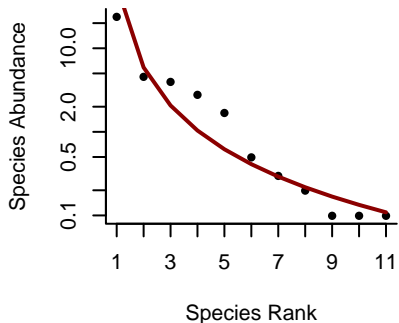**QDAMGD0020-53500**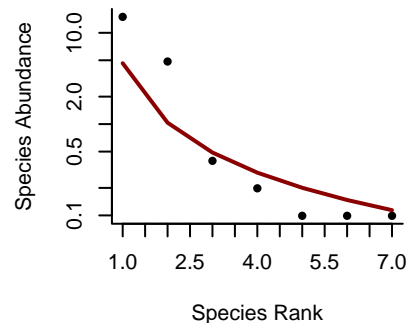



**QDAMGD0021-53543**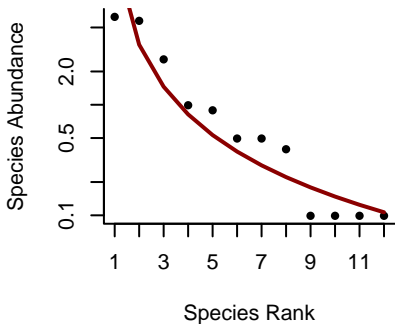**QDAMGD0022-53501**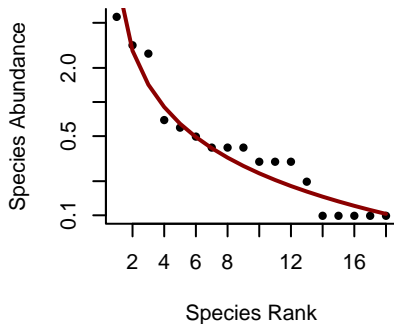**QDAMGD0023-53544**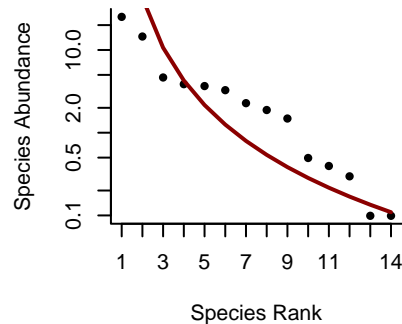**QDAMGD0024-53502**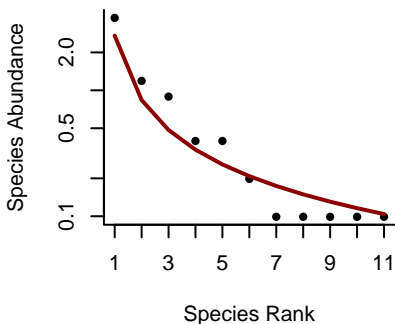**QDAMGD0025-53545**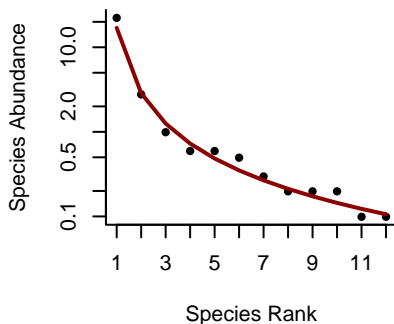**QDAMGD0026-53503**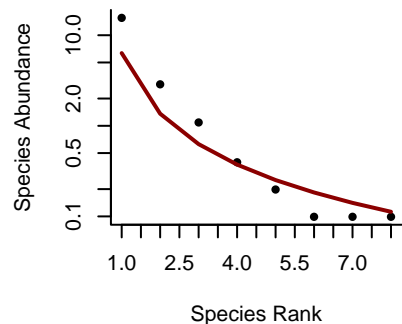**QDAMGD0027-56936**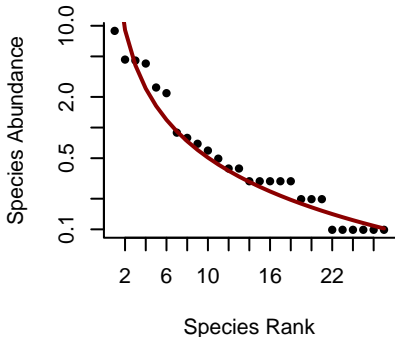**QDAMGD0028-56937**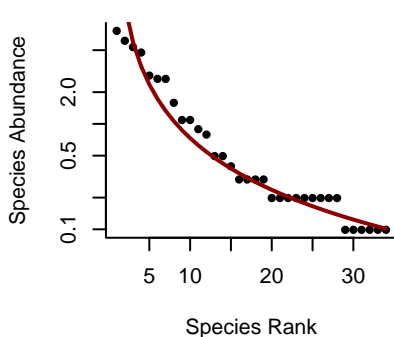**QDAMII0001-53504**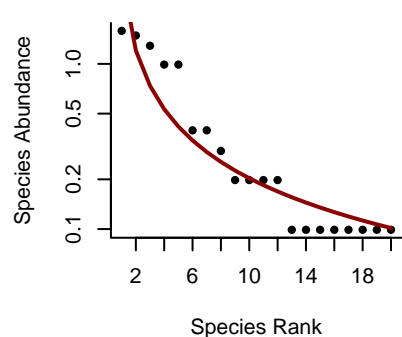

**QDAMII0002-53546**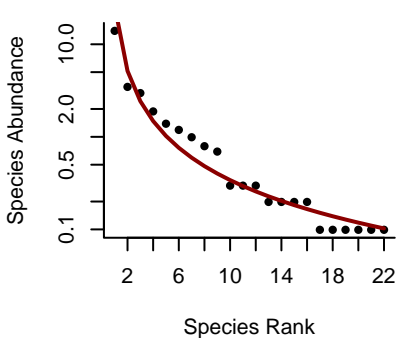**QDAMUL0001-53594**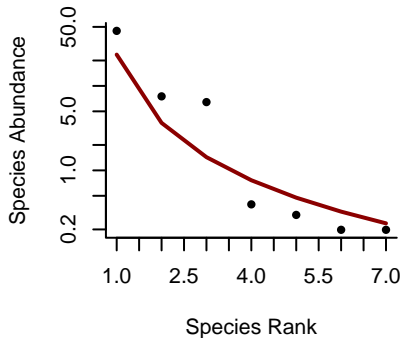**QDAMUL0003-53595**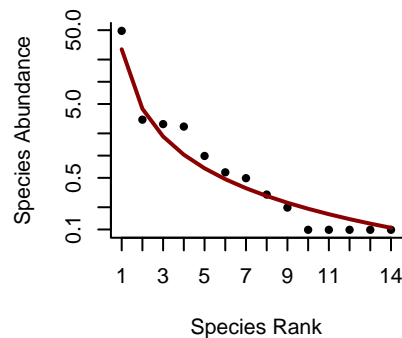**QDASSD0001-53756**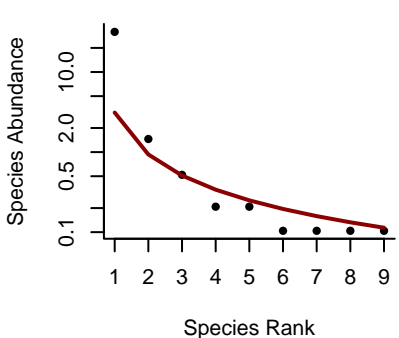**QDASSD0001-57621**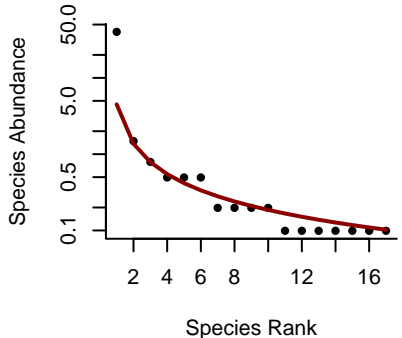**QDASSD0002-53757**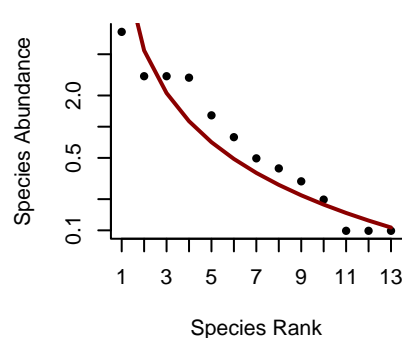**QDASSD0002-57622**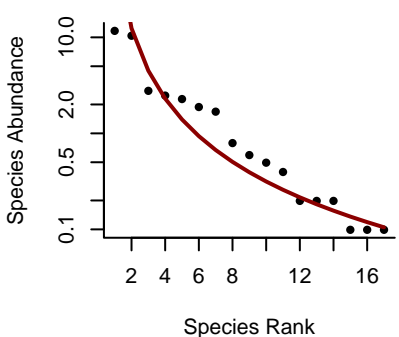**QDASSD0003-56912**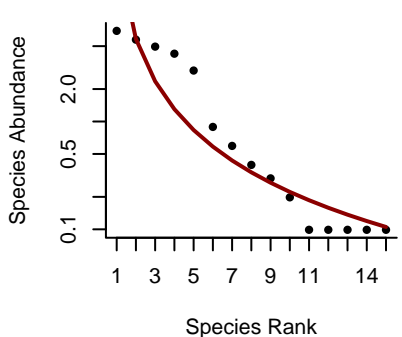**QDASSD0003-57623**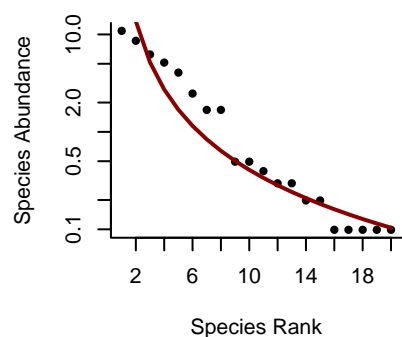

**QDASSD0004-56913**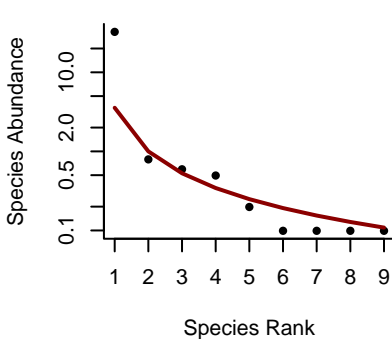**QDASSD0004-57624**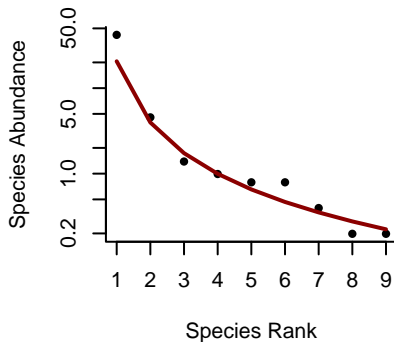**QDASSD0005-56914**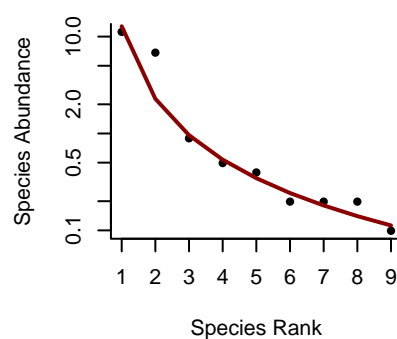**QDASSD0005-57625**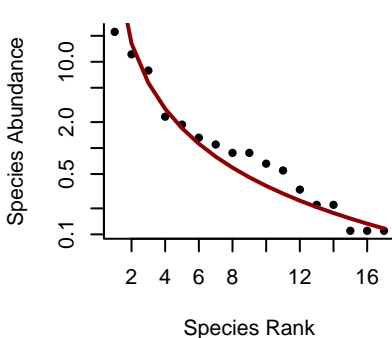**QDASSD0006-56915**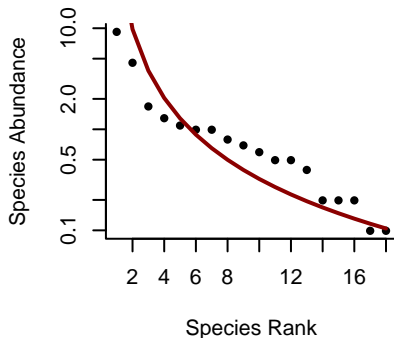**QDASSD0006-57626**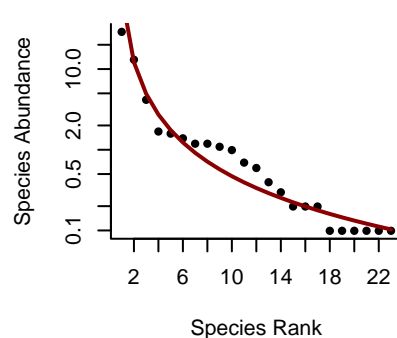**QDASSD0007-56916**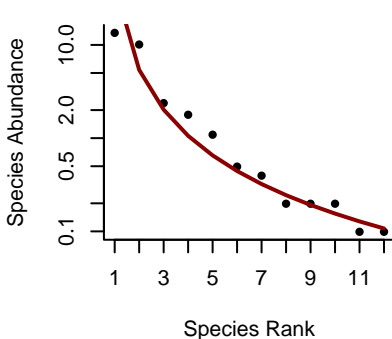**QDASSD0007-57627**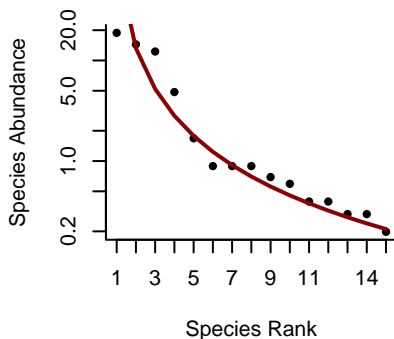**QDASSD0008-56917**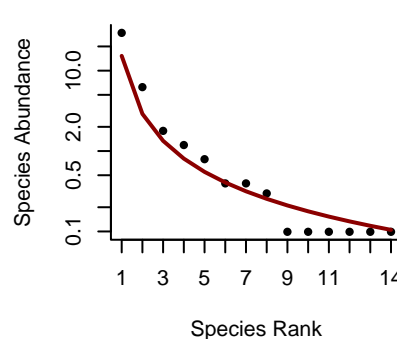

**QDASSD0008-57628**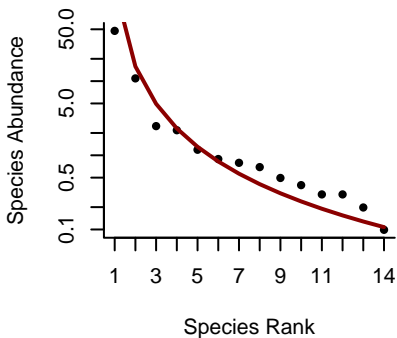**QDASSD0009-56918**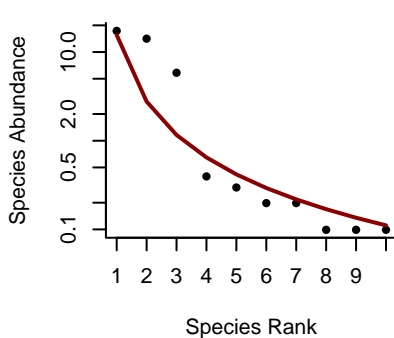**QDASSD0009-57629**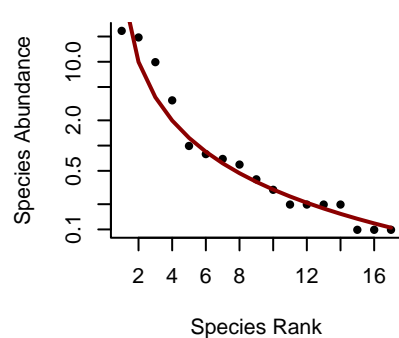**QDASSD0010-56919**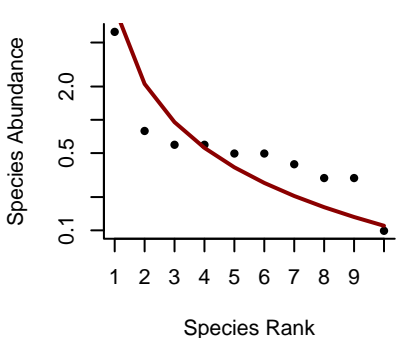**QDASSD0011-56920**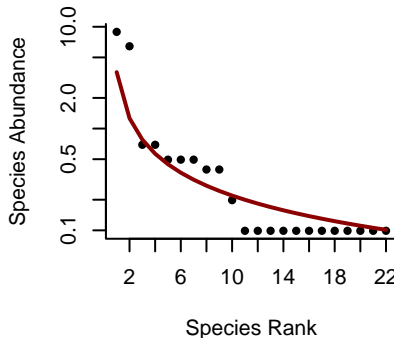**QDASSD0011-57631**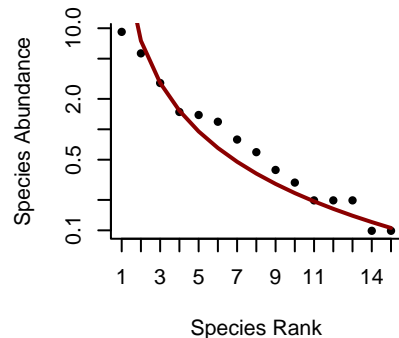**QDASSD0012-56921**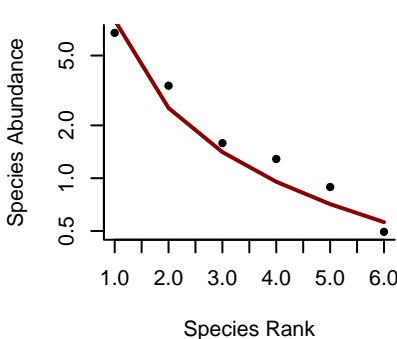**QDASSD0012-57632**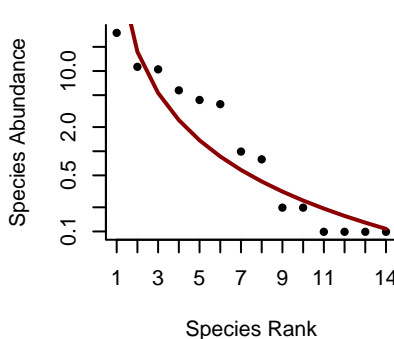**QDASSD0013-56922**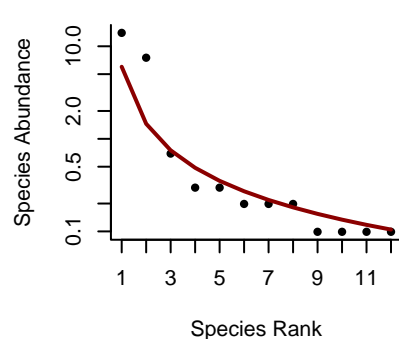

**QDASSD0013-57633**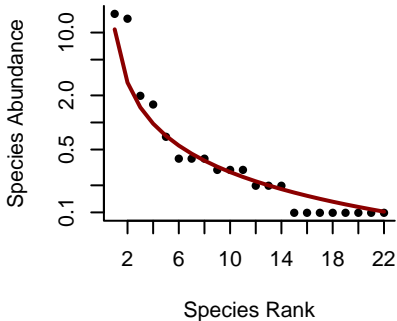**QDASSD0014-56923**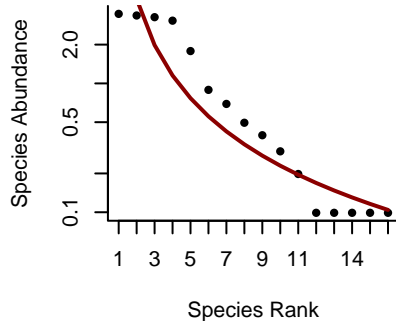**QDASSD0014-57634**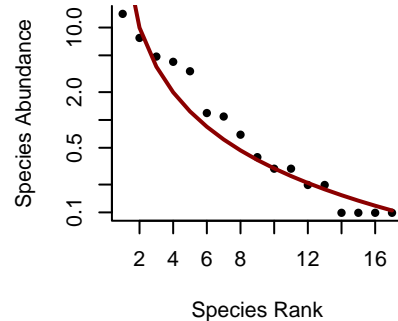**QDASSD0015-56924**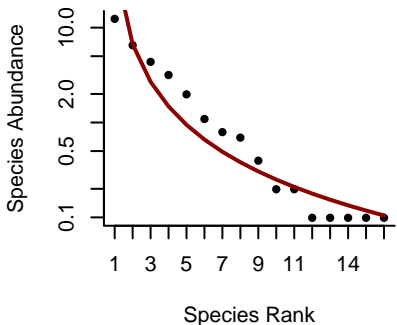**QDASSD0015-57635**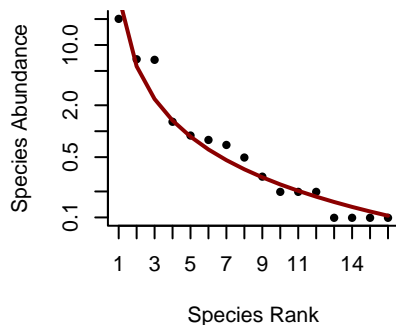**SAAEYB0001-57637**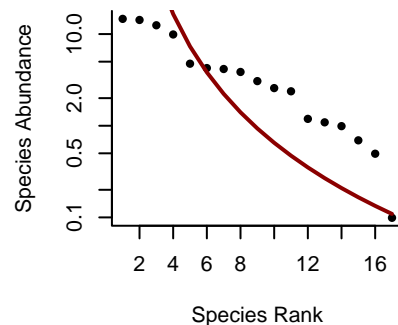**SA AFLB0030-53506**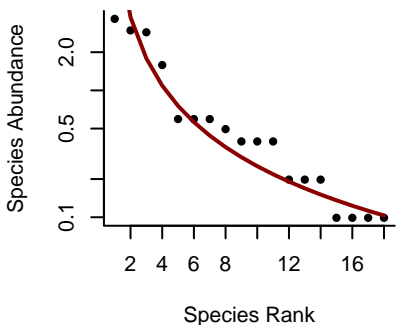**SA AFLB0031-53507**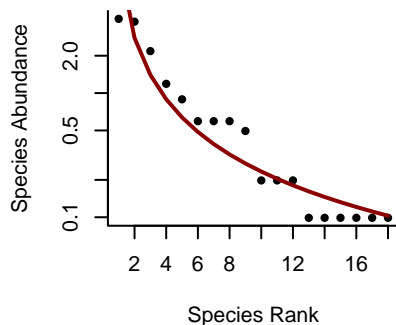**SAAGAW0001-56992**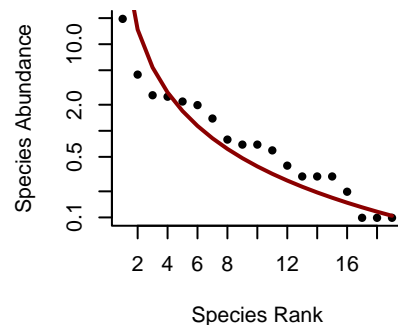

**SAAGAW0002-56993**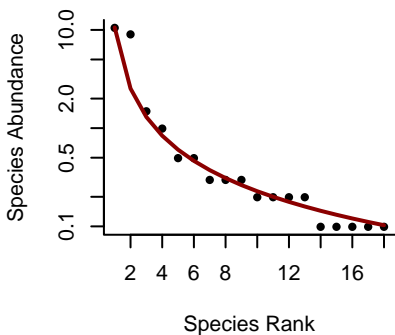**SAAGAW0003-56994**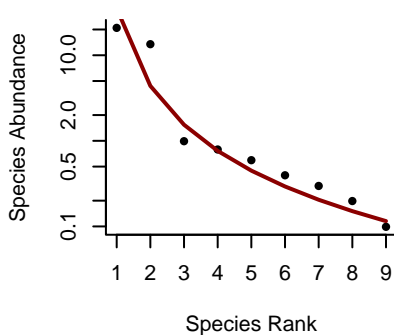**SAAGVD0001-56925**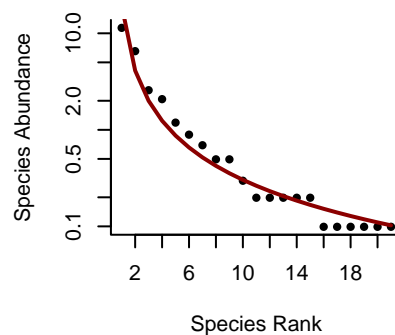**SAAGVD0002-56926**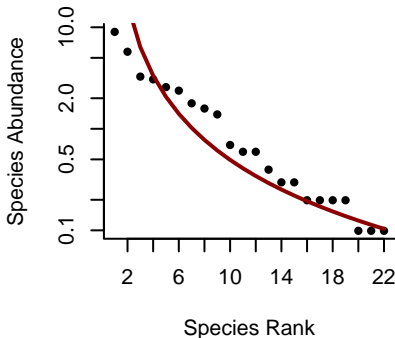**SAAGVD0003-56927**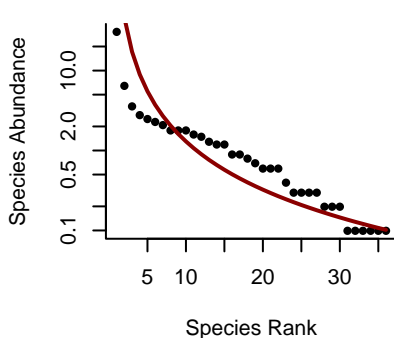**SAAGVD0004-56947**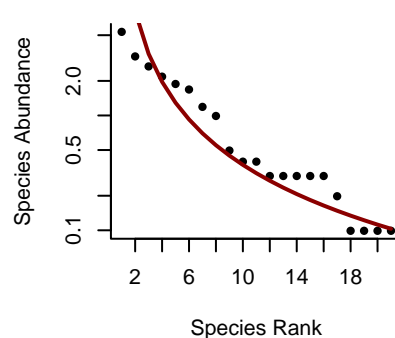**SAAMDD0007-53742**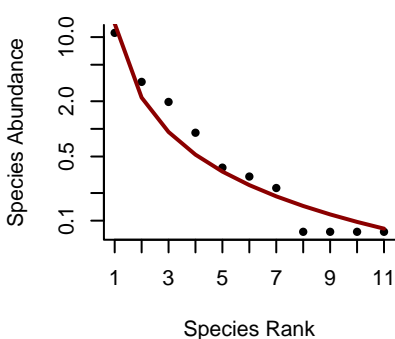**SAAMDD0008-53743**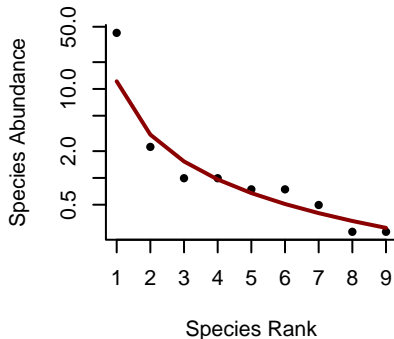**SAAMDD0009-53744**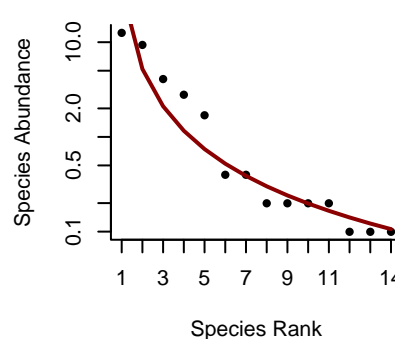

**SAAMDD0010-53700**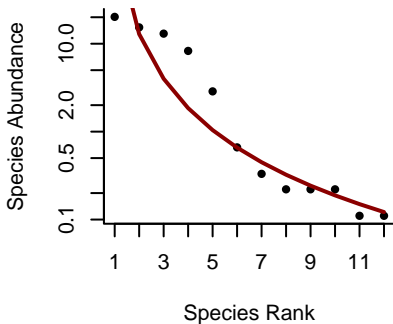**SAAMDD0011-53745**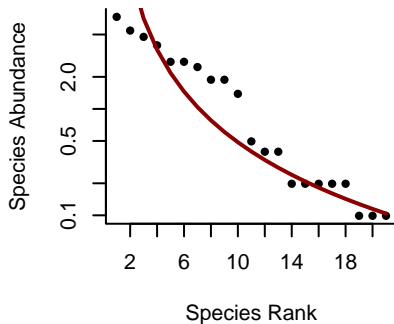**SAANUL0001-56948**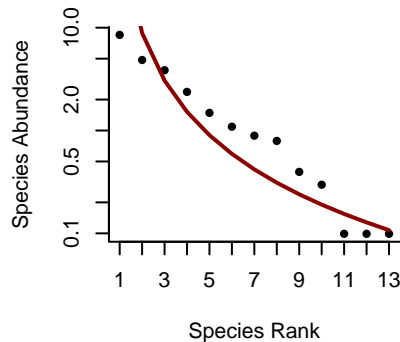**SAANUL0002-56949**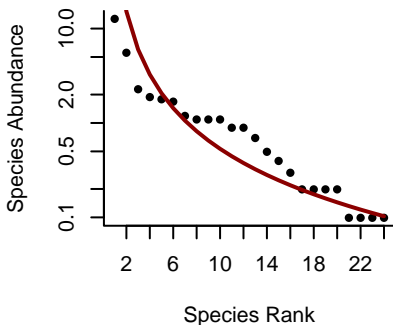**SAANUL0003-56950**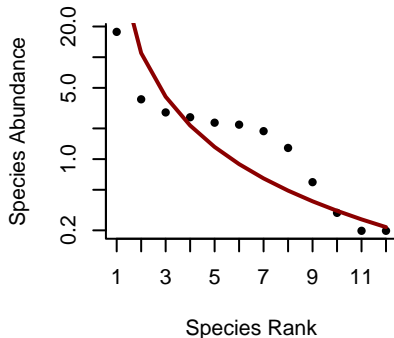**SAANUL0004-56951**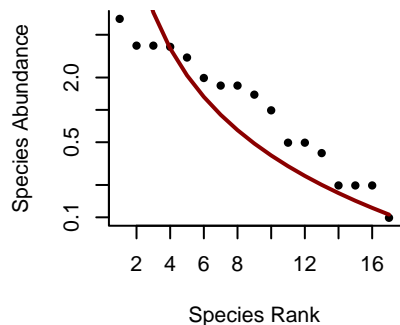**SAARIV0001-57090**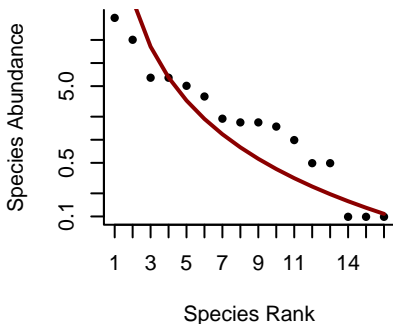**SAARIV0002-57091**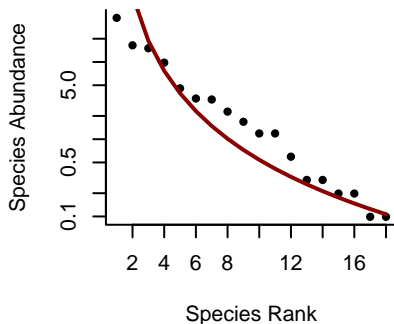**SAARIV0003-57092**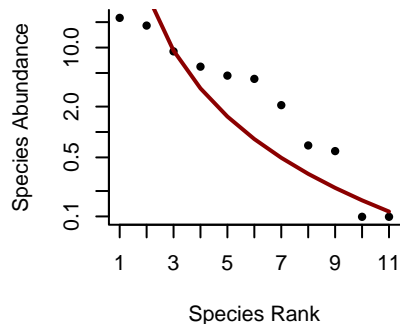

**SAARIV0004-57093**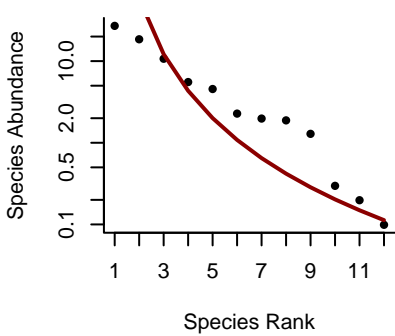**SAARIV0005-57094**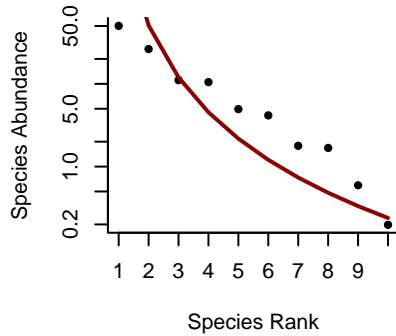**SAARIV0006-57095**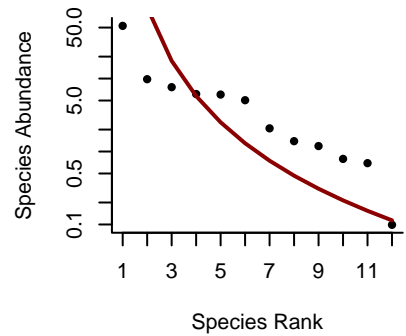**SAARIV0007-57096**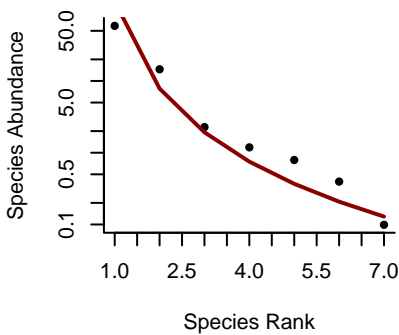**SAARIV0008-57097**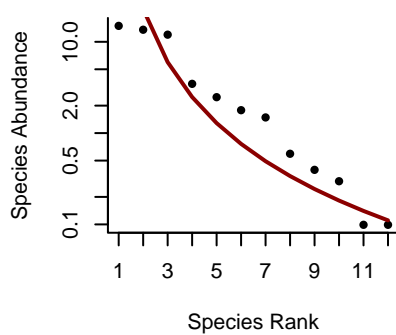**SAARIV0009-57089**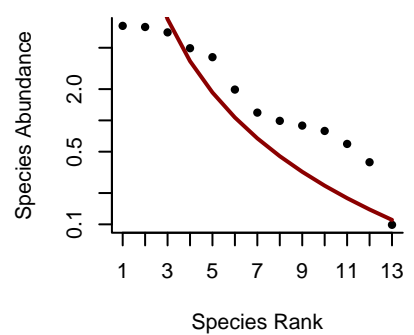**SAASTP0001-53719**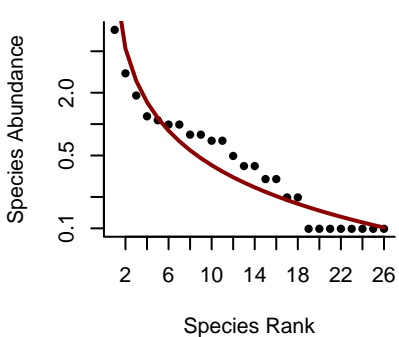**SAASTP0002-53720**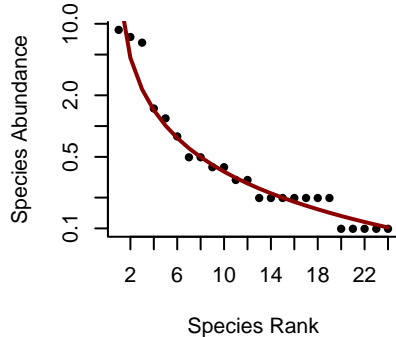**SAASTP0003-53721**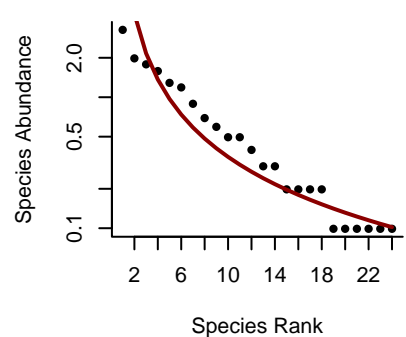



**SAASTP0004-53722**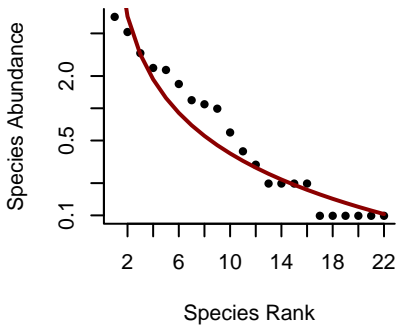**SAASTP0005-53723**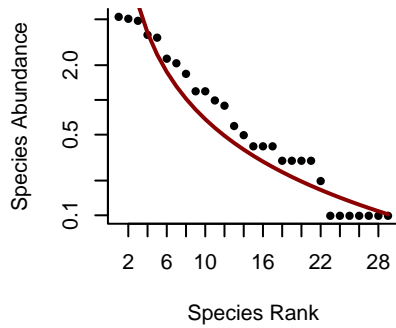**SAASTP0007-53724**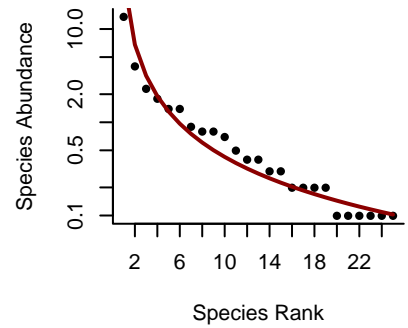**SAASTP0008-53725**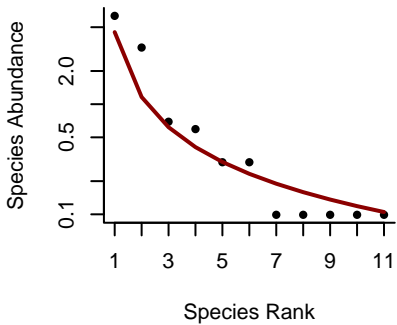**SAASTP0009-53726**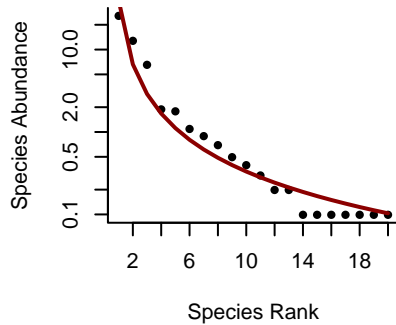**SAASTP0010-53727**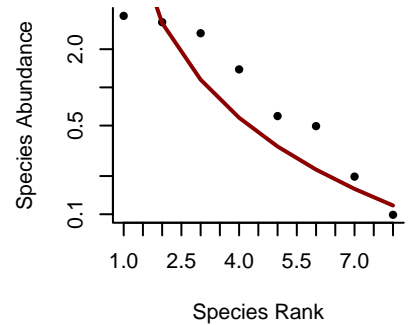**SAASTP0011-53728**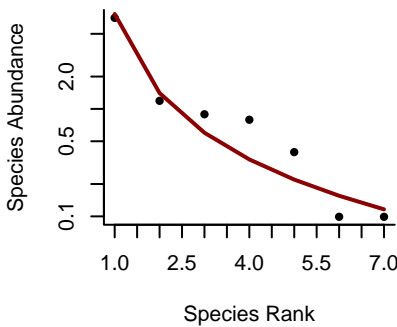**SAASTP0012-53729**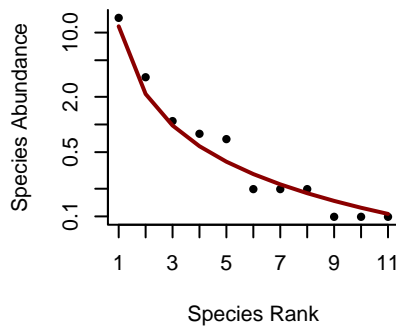**SAASTP0013-53730**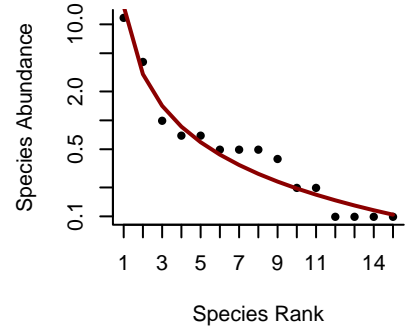

**SAASTP0015-53715**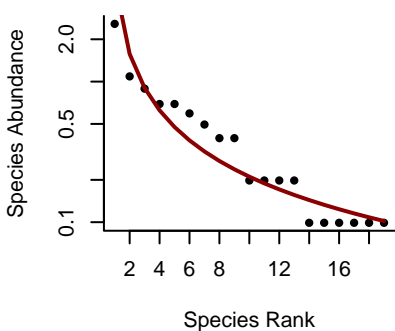**SAASTP0016-53716**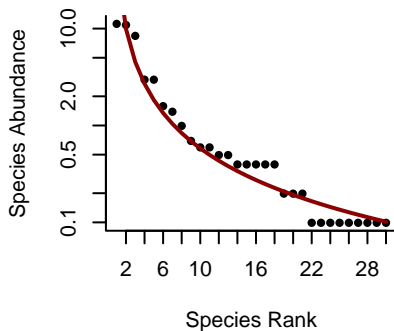**SAASTP0017-53717**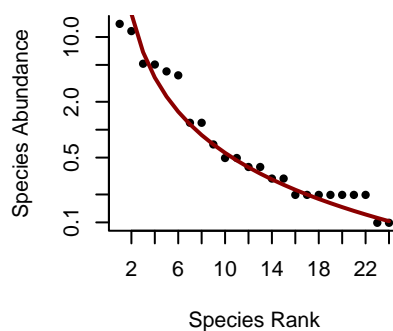**SAASTP0018-53718**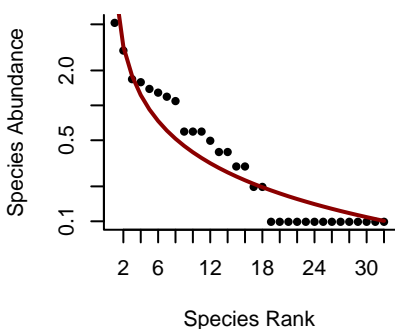**SAASTP0019-53731**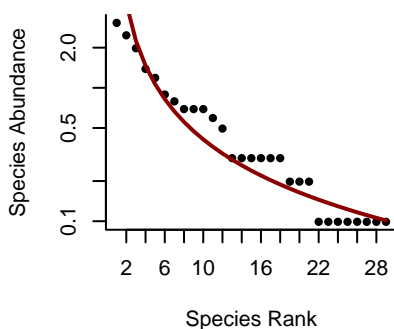**SAASTP0020-53732**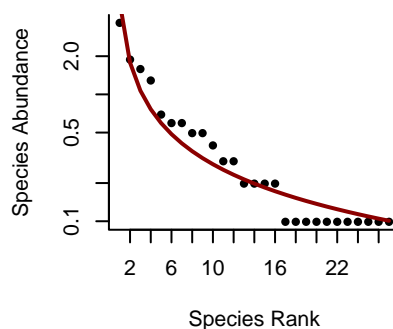**SAASTP0021-53733**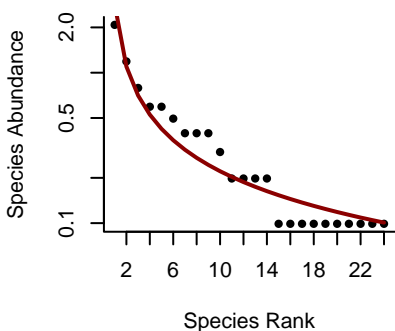**SAASTP0022-53735**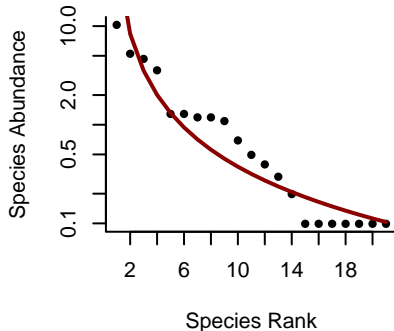**SAASTP0023-53736**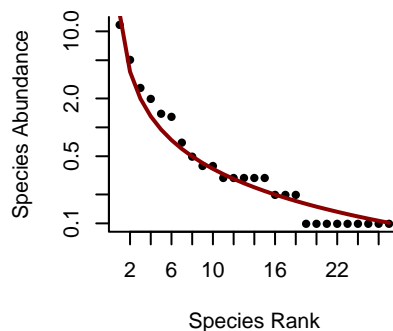

**SAASTP0024-53737**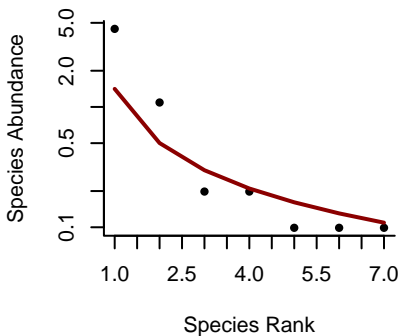**SAASTP0025-53734**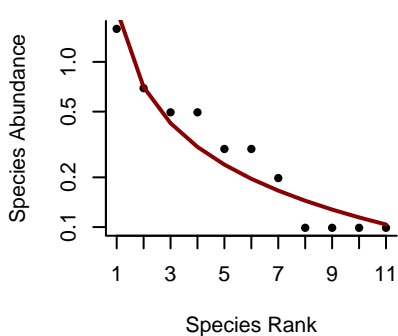**SAASTP0026-53738**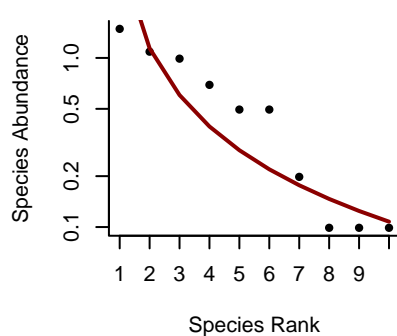**SAASTP0027-53739**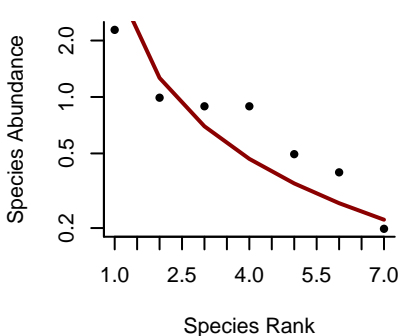**SAASTP0028-53740**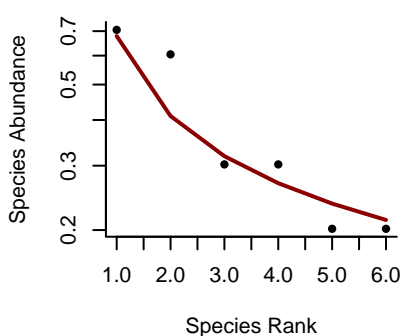**SAASTP0029-53741**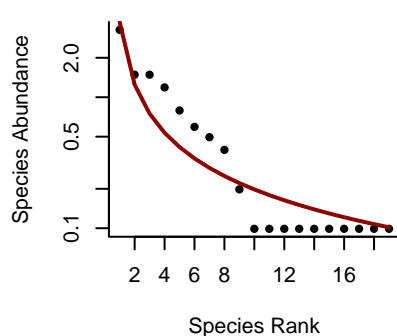**SAASTP0030-56935**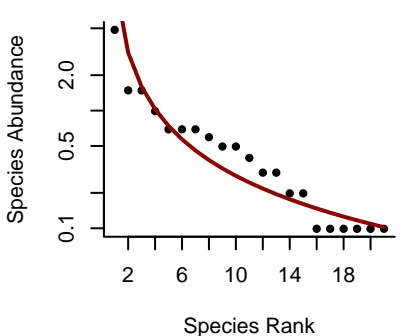**SAASTP0031-56938**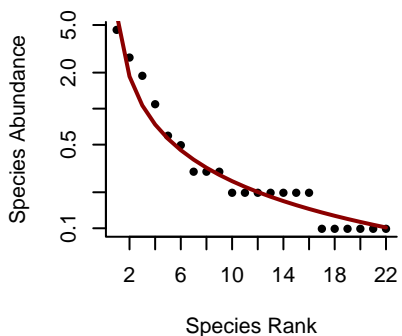**SAASTP0032-56939**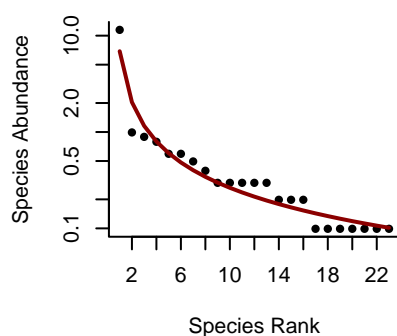

**SASMDD0001-53710**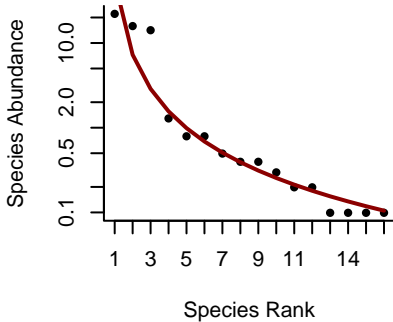**SASMDD0002-53711**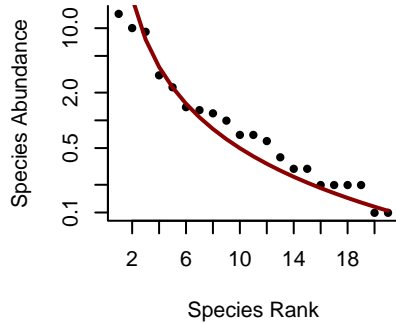**SASMDD0003-57009**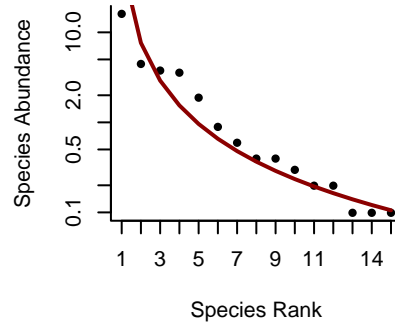**SASMDD0004-56997**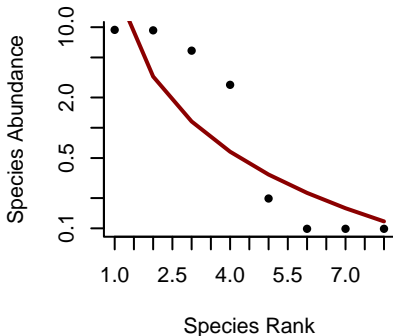**SASMDD0004-57013**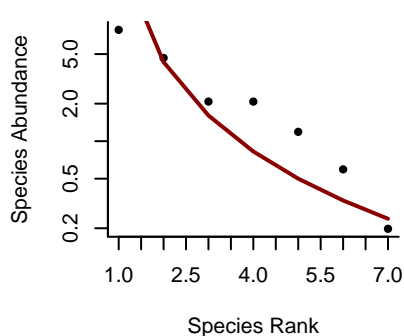**SASMDD0005-53712**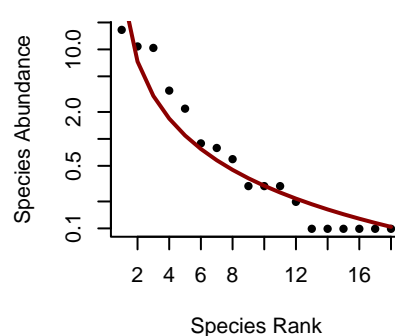**SASMDD0005-57006**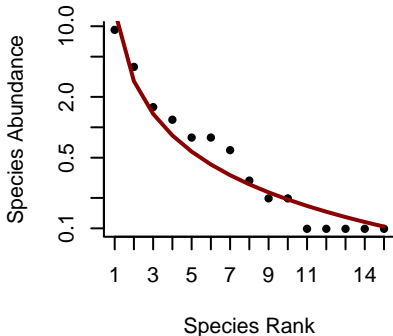**SASMDD0006-53713**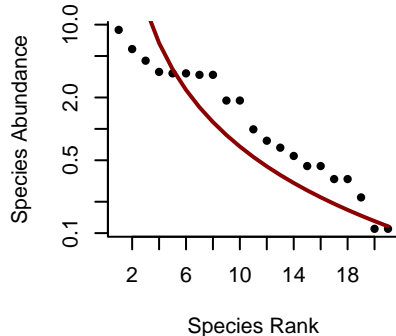**SASMDD0006-57007**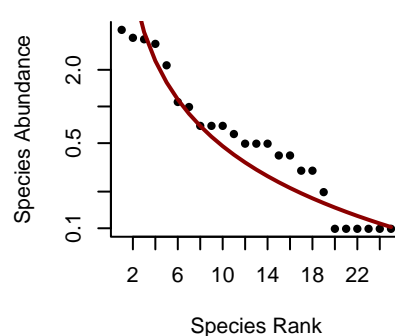

**SASMDD0008-57638**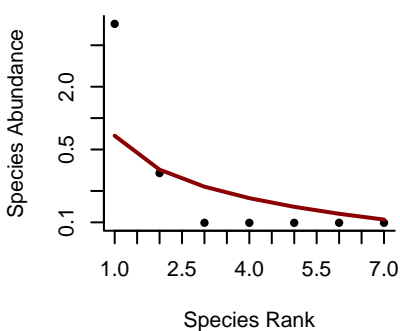**SASMDD0009-57008**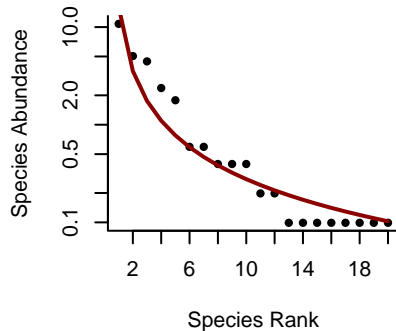**SASMDD0011-56998**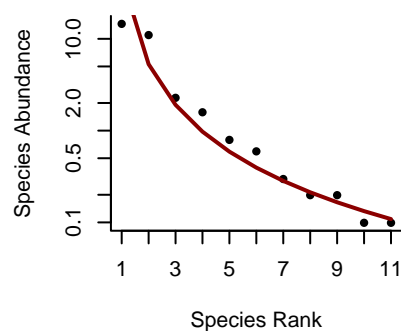**SASMDD0012-56974**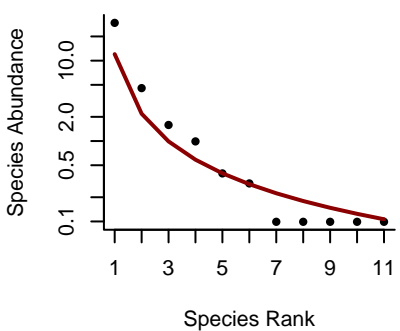**SASMDD0013-56979**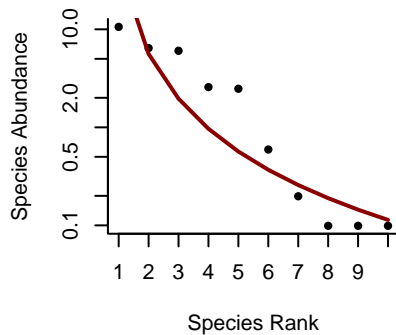**SASMDD0014-56980**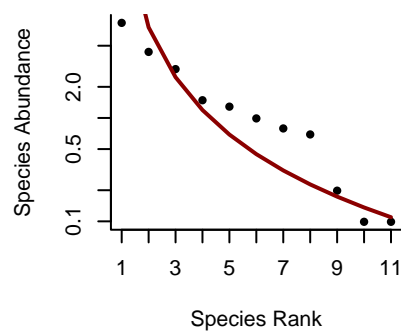**SASMDD0016-57000**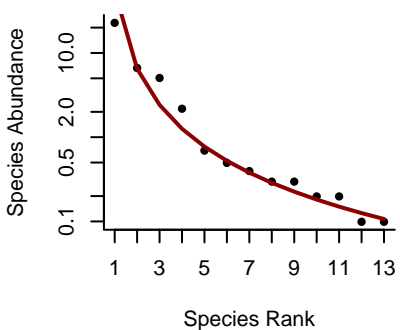**SASMDD0018-57010**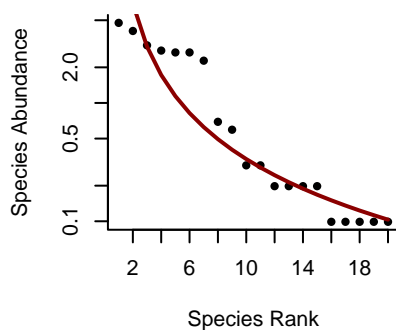**SATEYB0001-56940**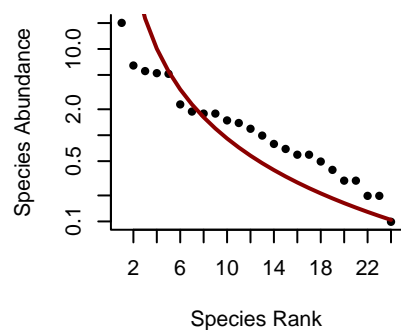

**SATEYB0002-56991**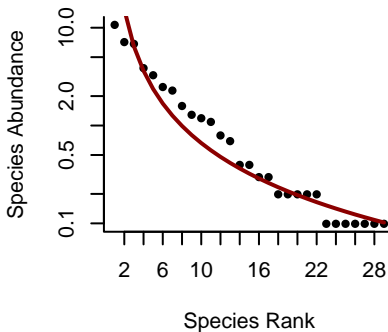**SATFLB0001-53698**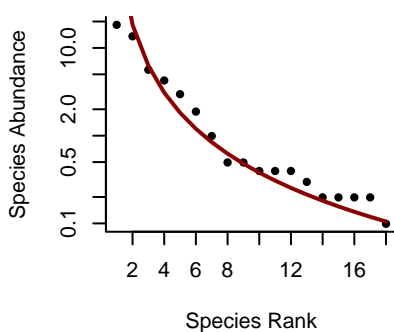**SATFLB0002-53703**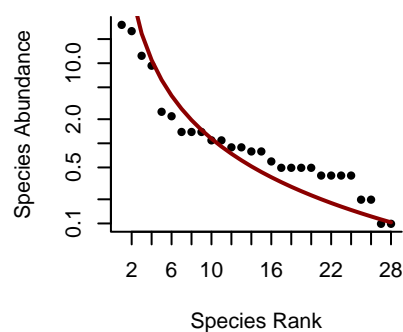**SATFLB0003-53704**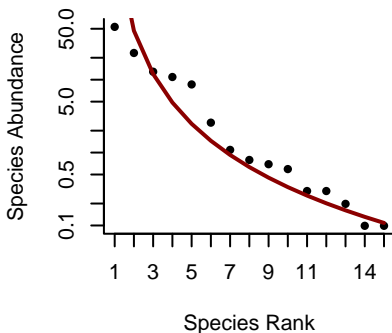**SATFLB0004-53705**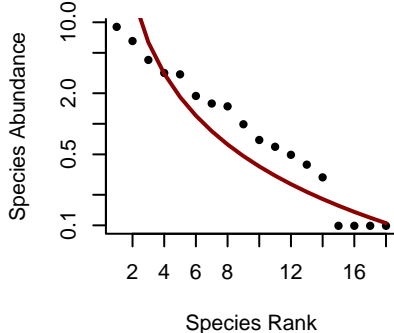**SATFLB0005-53706**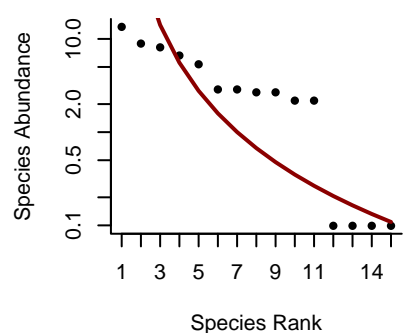**SATFLB0006-53708**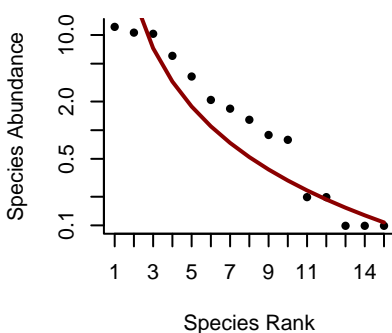**SATFLB0007-53709**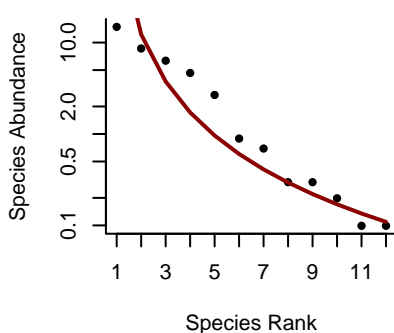**SATFLB0008-53752**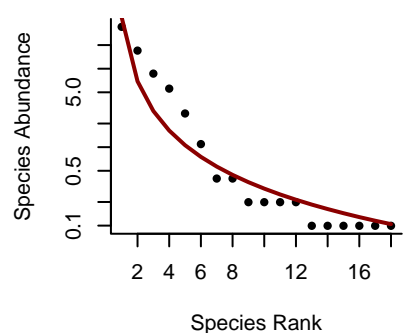

**SATFLB0009-53753**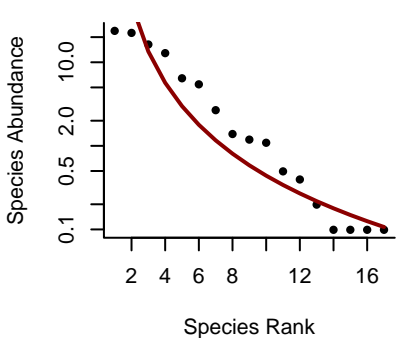**SATFLB0010-53714**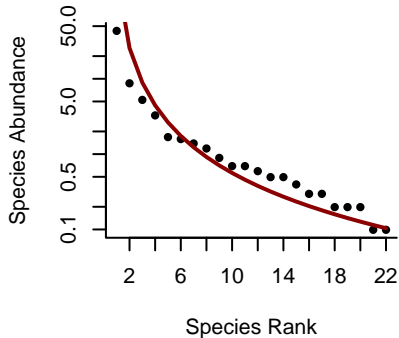**SATFLB0011-53754**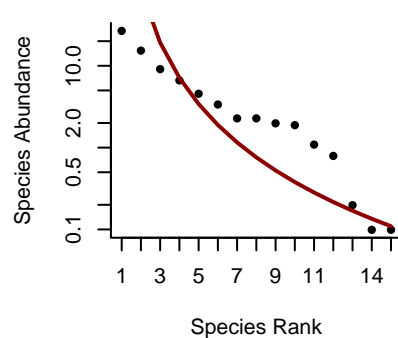**SATFLB0012-53699**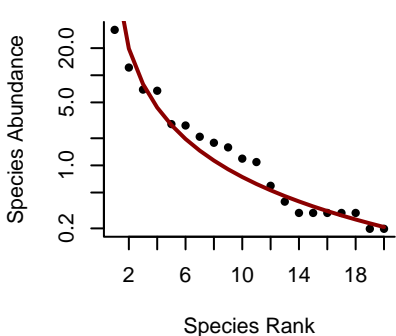**SATFLB0013-53701**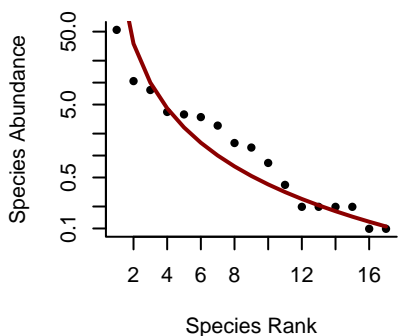**SATFLB0014-53702**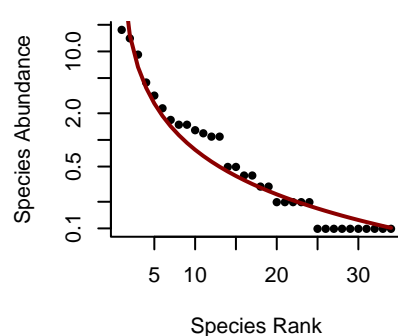**SATFLB0015-53707**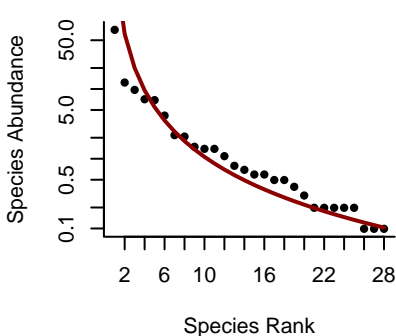**SATFLB0016-53547**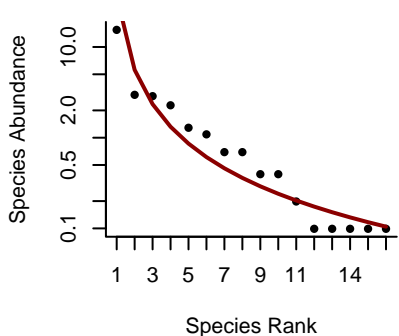**SATFLB0017-53548**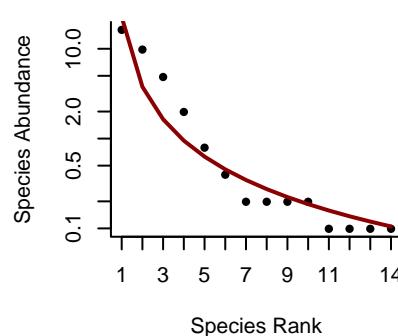

**SATFLB0018-53549**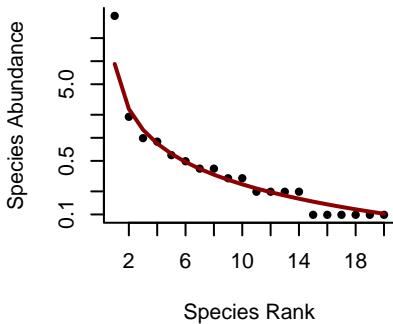**SATFLB0019-53550**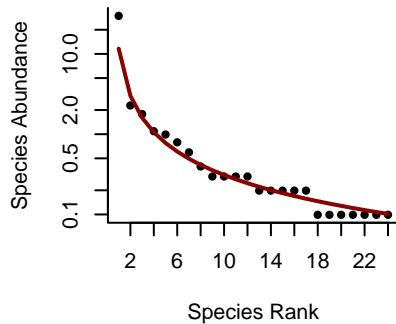**SATFLB0020-53551**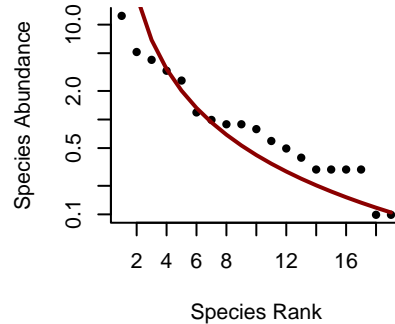**SATFLB0021-53552**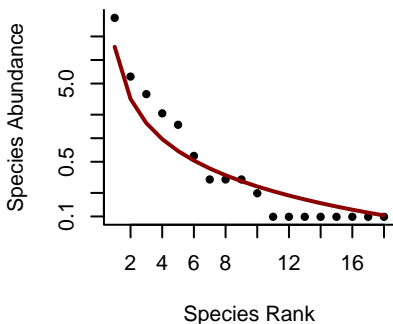**SATFLB0022-53553**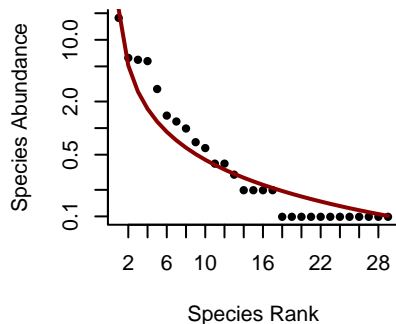**SATFLB0023-53554**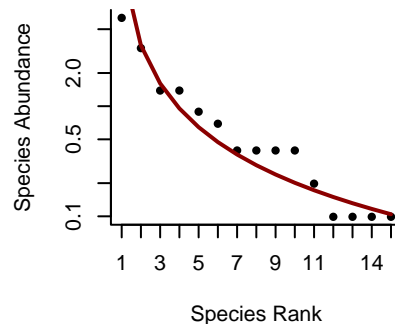**SATFLB0024-53555**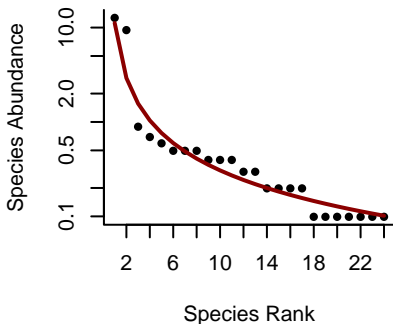**SATFLB0025-53556**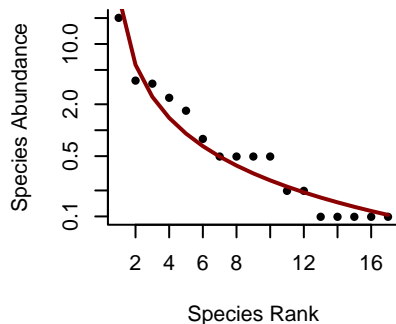**SATFLB0026-57001**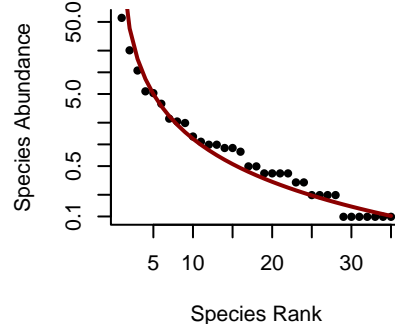



**SATFLB0027-56975**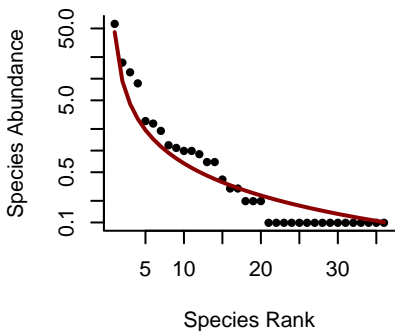**SATFLB0028-56995**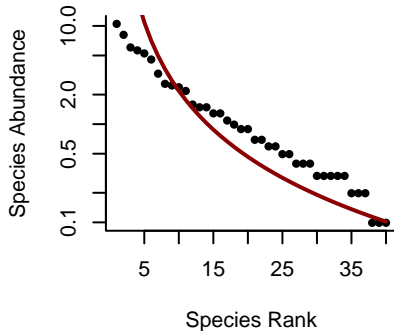**SATKAN0001-53688**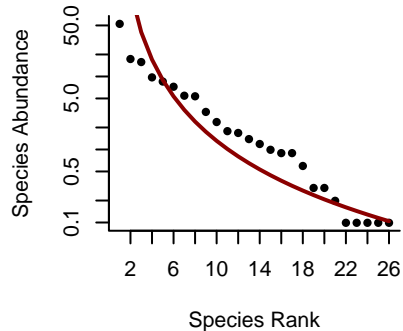**SATKAN0002-53689**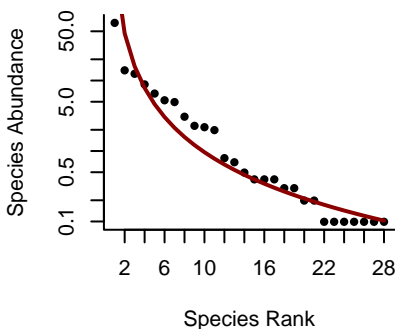**SATKAN0003-56996**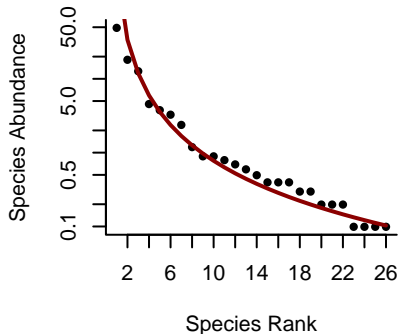**SATKAN0004-56928**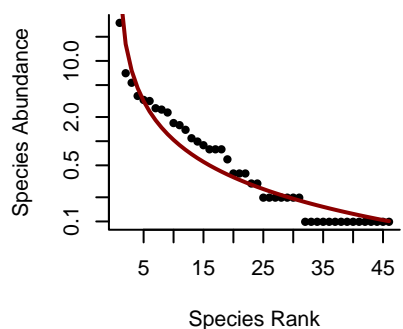**SATSTP0001-53557**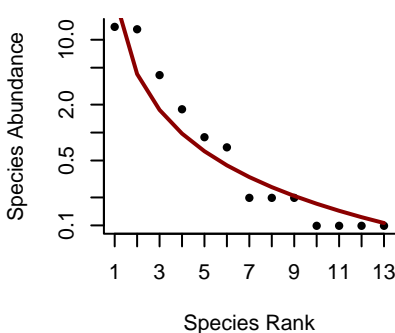**SATSTP0002-53558**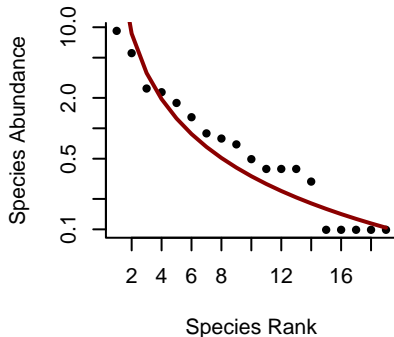**SATSTP0003-53511**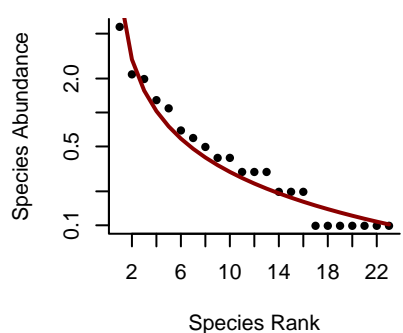

**SATSTP0004-53512**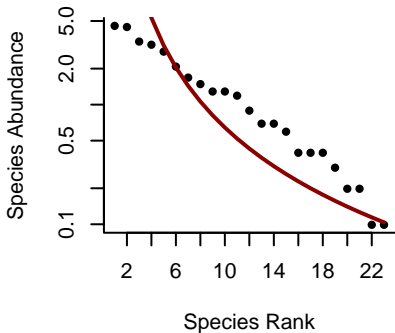**SATSTP0005-53513**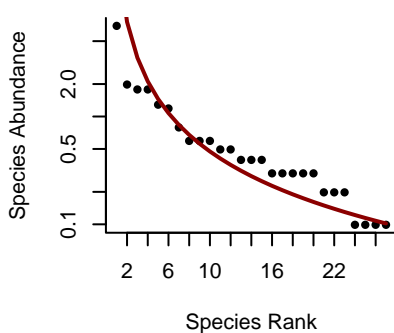**SATSTP0006-53514**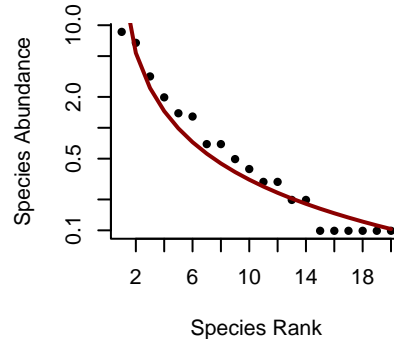**SATSTP0007-53515**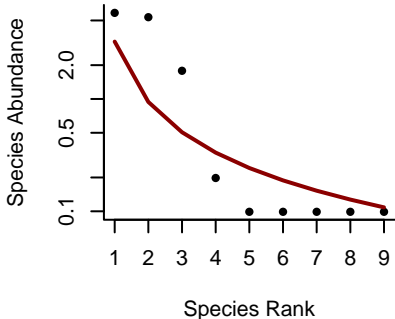**SATSTP0008-53516**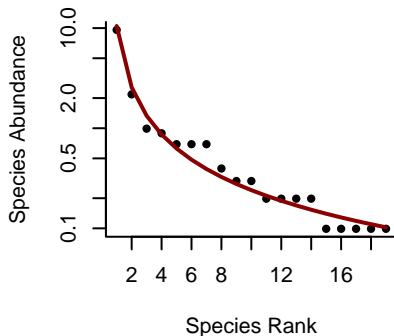**VCAMDD0002-56990**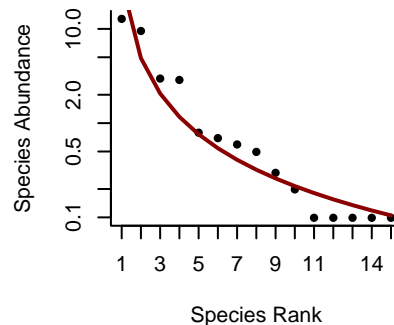**VCAMDD0003-57012**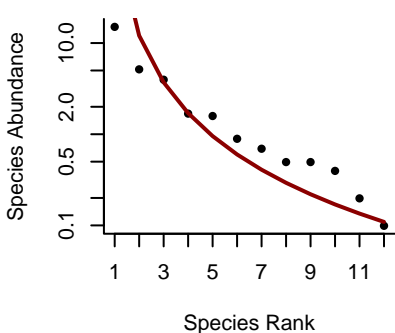**WAACOO0001-53444**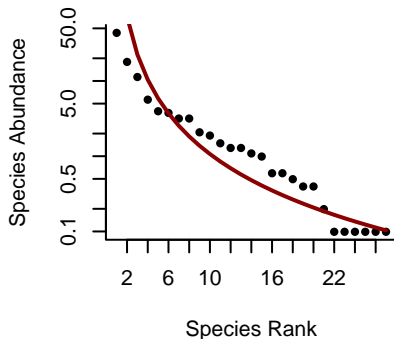**WAACOO0003-53447**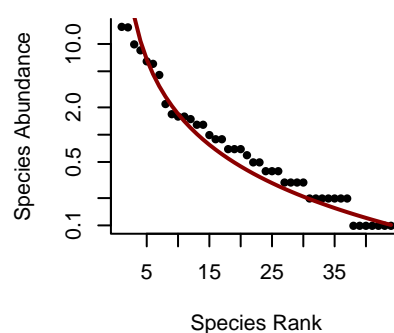

**WAACOO0004-53449**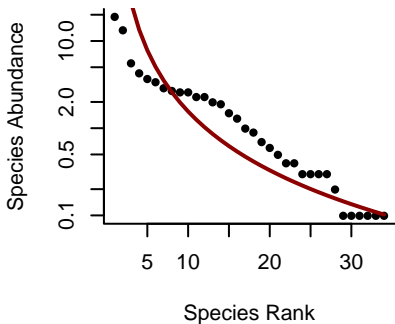**WAACOO0005-53446**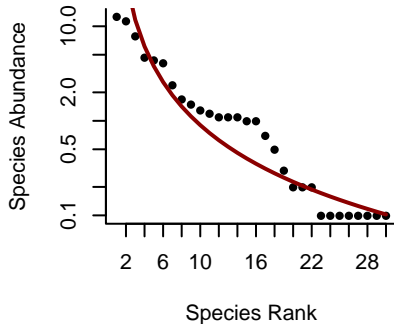**WAACOO0006-53438**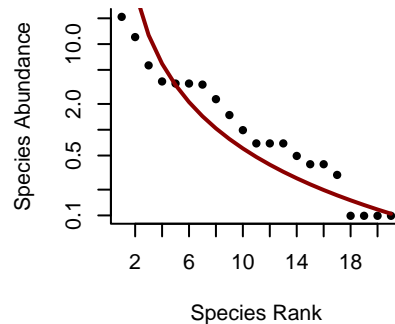**WAACOO0007-53440**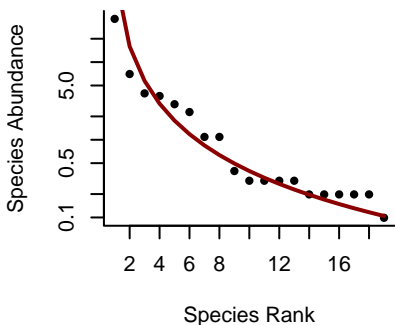**WAACOO0008-53442**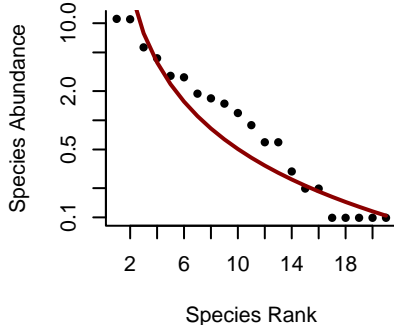**WAACOO0009-53443**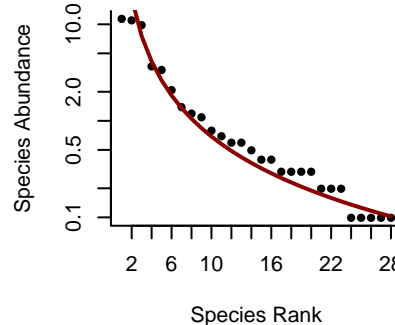**WAACOO0010-53441**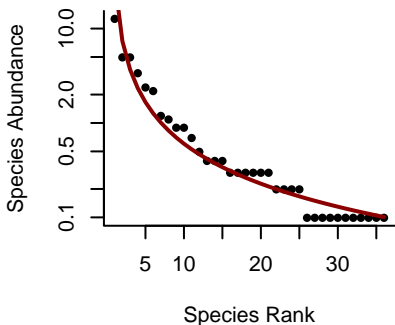**WAACOO0011-53439**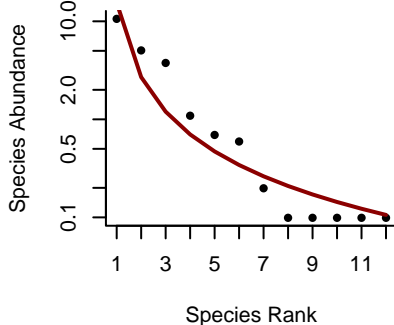**WAACOO0012-53462**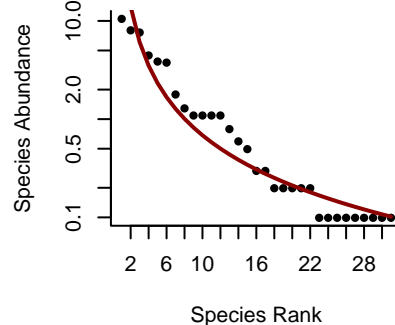

**WAACOO0016-53459**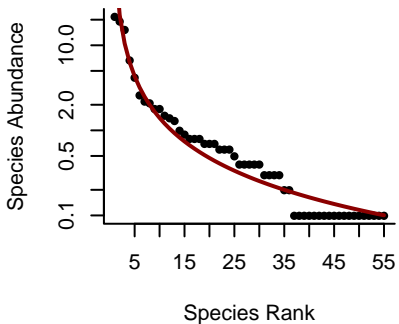**WAACOO0017-53460**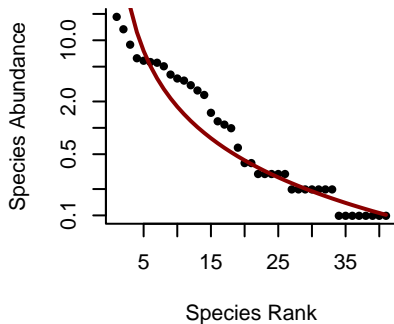**WAACOO0018-53461**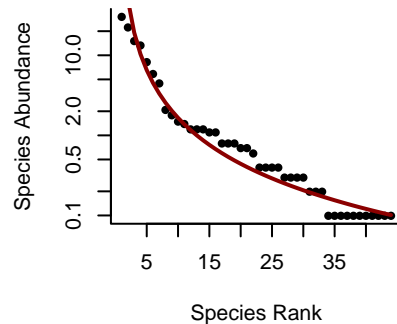**WAACOO0019-53463**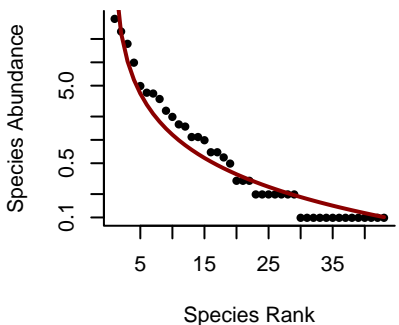**WAACOO0020-53450**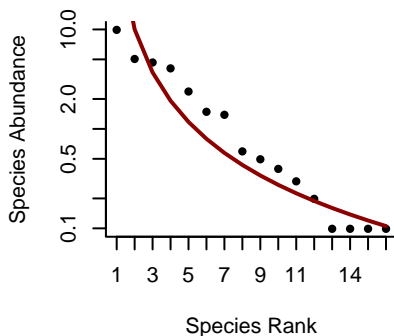**WAACOO0021-53456**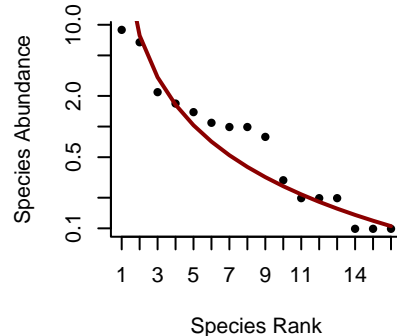**WAACOO0022-53453**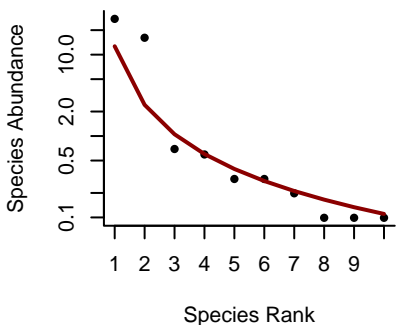**WAACOO0023-53448**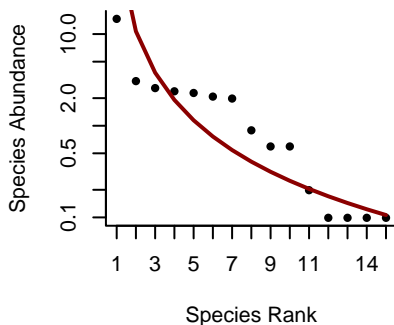**WAACOO0024-53451**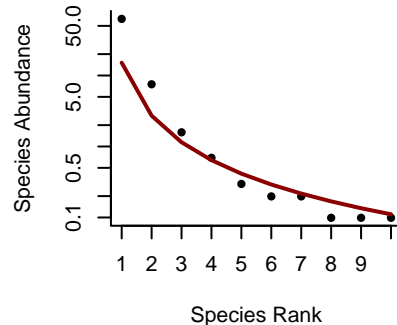

**WAACOO0025-53452**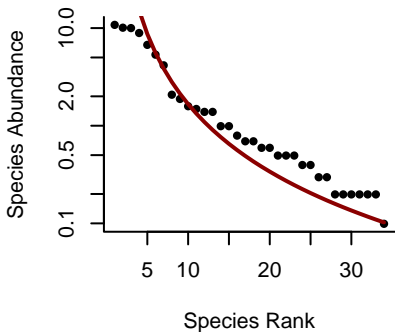**WAACOO0026-53454**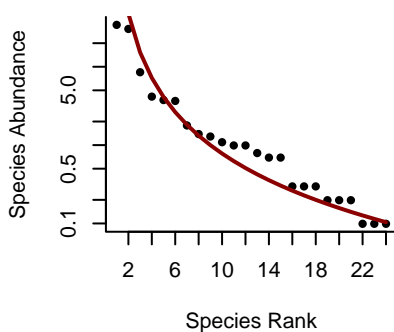**WAACOO0027-53455**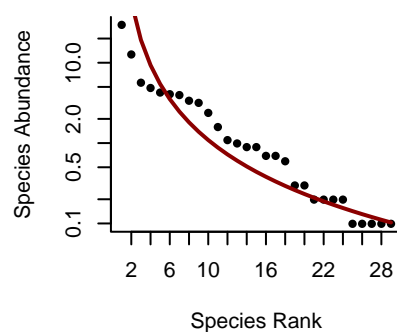**WAACOO0028-53457**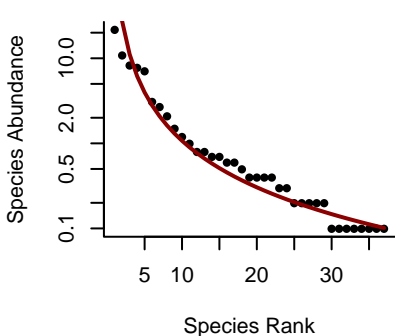**WAACOO0029-53458**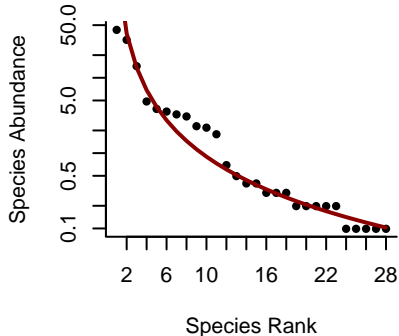**WAACOO0030-56958**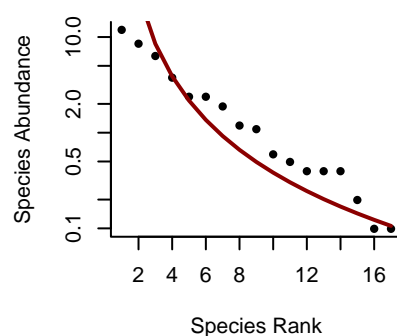**WAAGVD0001-56960**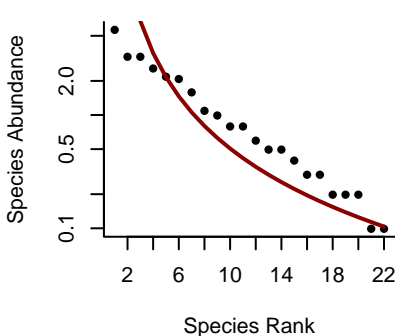**WAAHAM0001-56964**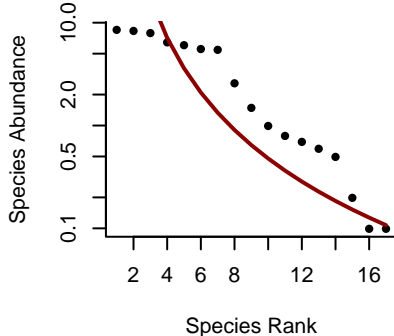**WAAHAM0002-56941**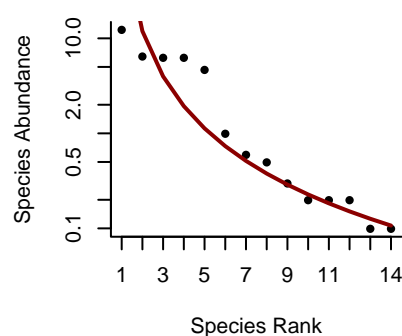

**WAAHAM0003-56959**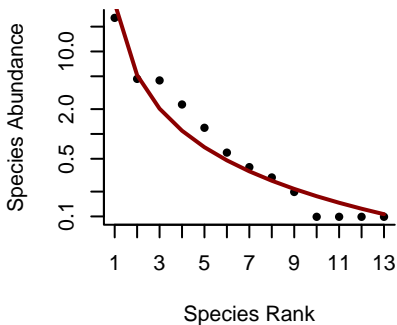**WAAHAM0004-56942**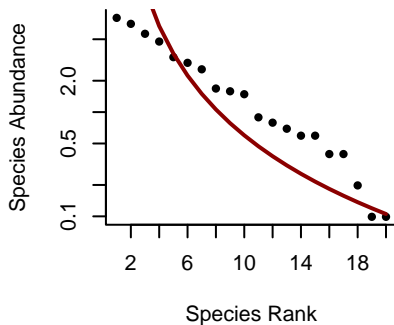**WAAHAM0005-56961**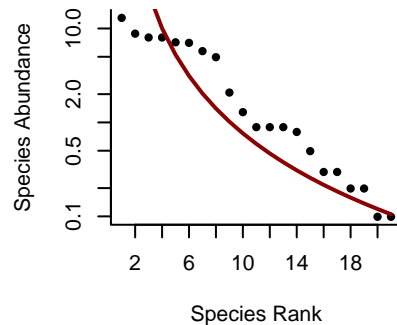**WAAHAM0006-56944**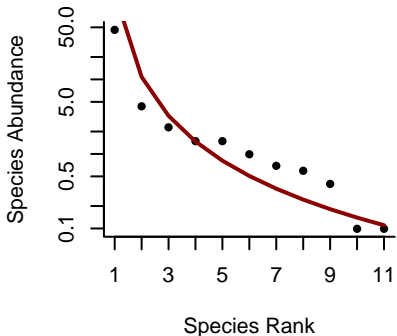**WAALSD0001-53569**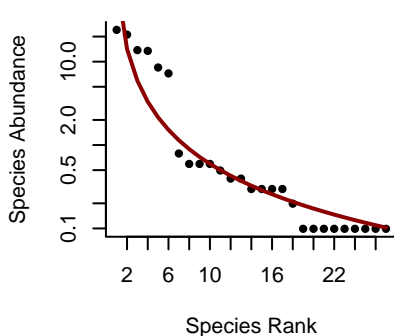**WAALSD0002-53570**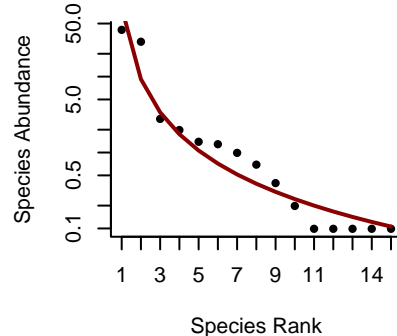**WAALSD0003-53571**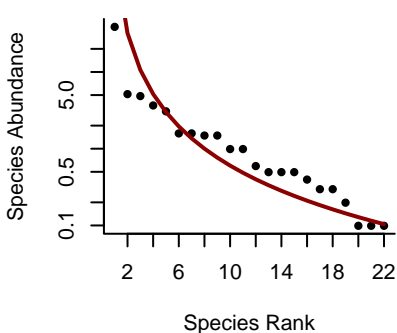**WAAMAL0001-56962**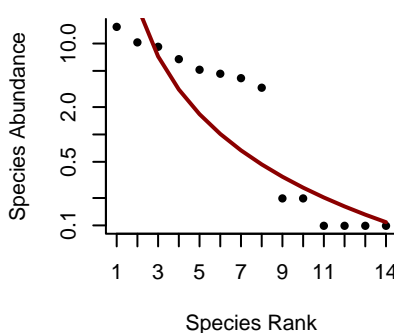**WAAMUR0028-53572**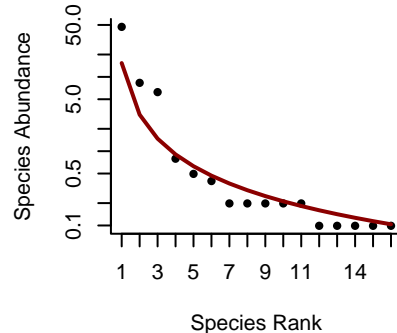

**WAAMUR0029-53573**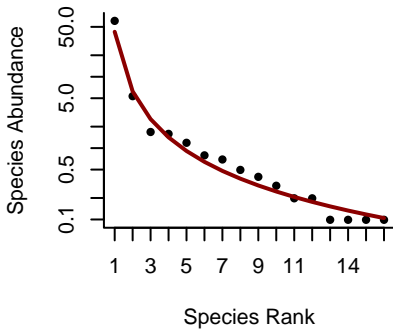**WAAMUR0030-53464**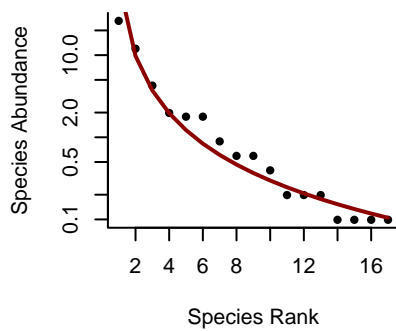**WAAMUR0031-53465**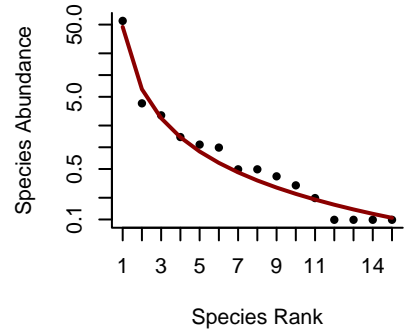**WAANUL0001-56966**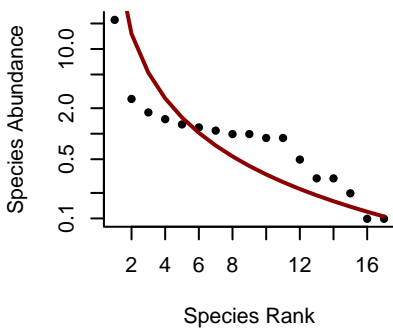**WAANUL0002-56945**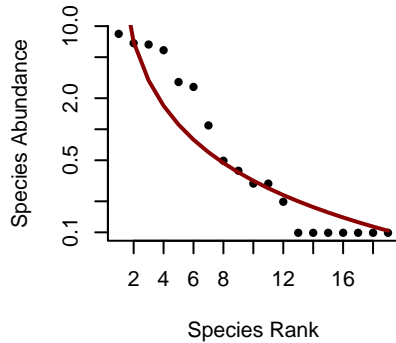**WAANUL0003-56946**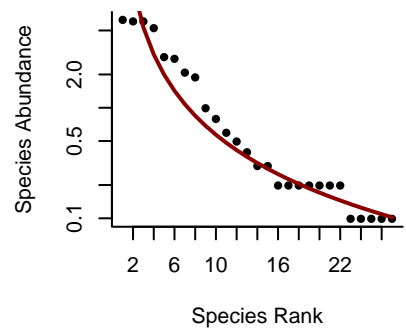**WAANUL0004-56967**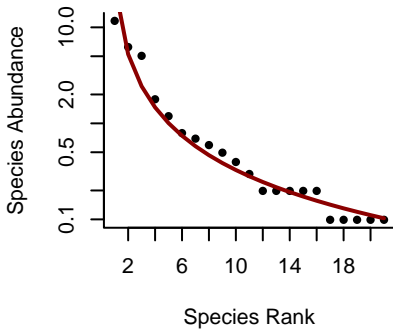**WAANUL0005-56931**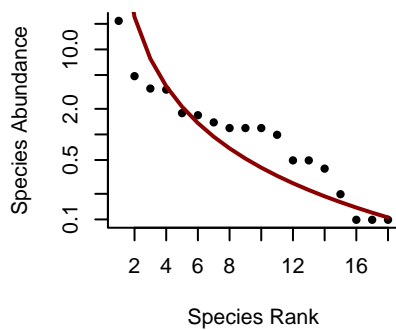**WAANUL0006-56929**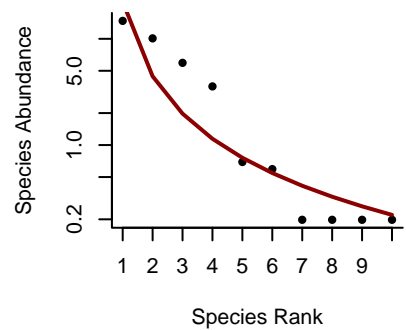

**WAANUL0007-56932**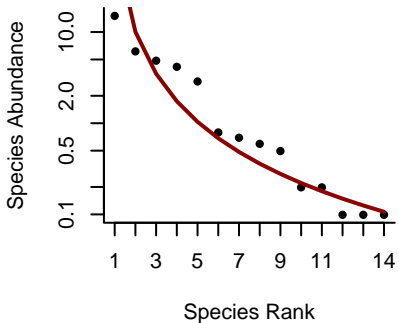**WAANUL0008-56933**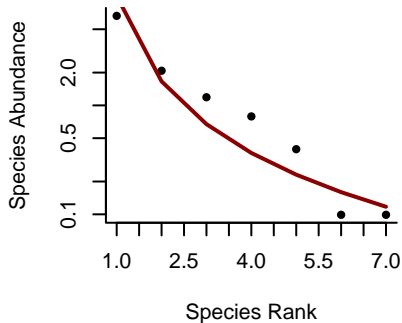**WAANUL0009-56934**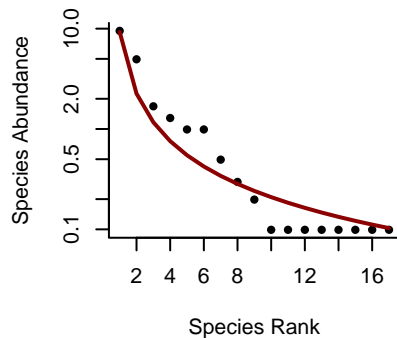**WAAPIL0001-57619**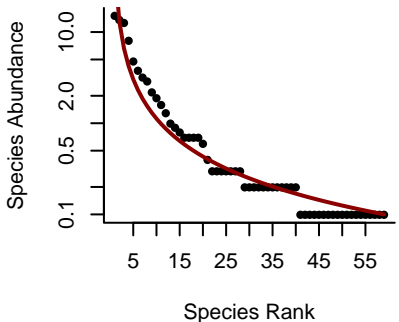**WAAPIL0002-57620**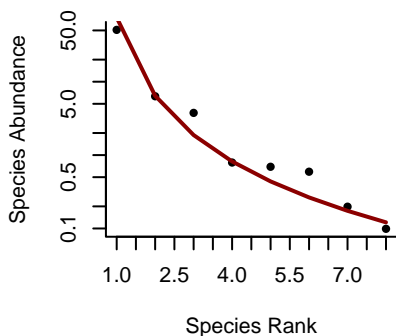**WAAPIL0003-57601**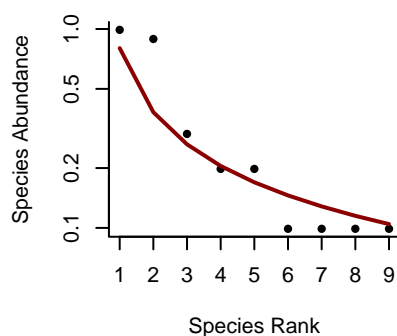**WAAPIL0004-57085**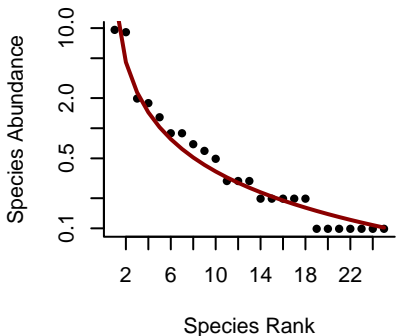**WAAPIL0005-57618**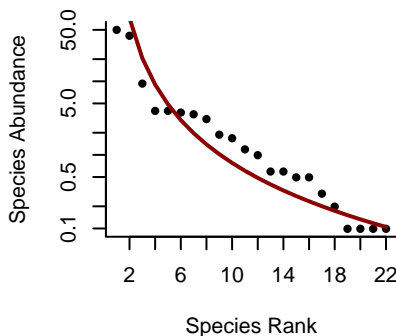**WAAPIL0007-57602**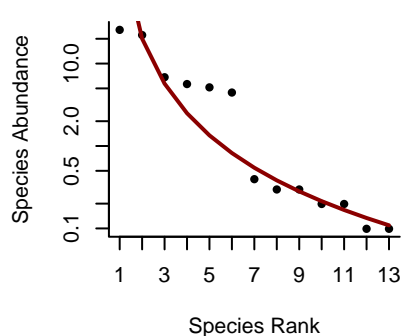



**WAAPIL0008-57605**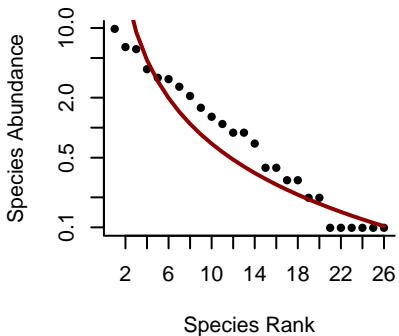**WAAPIL0009-57606**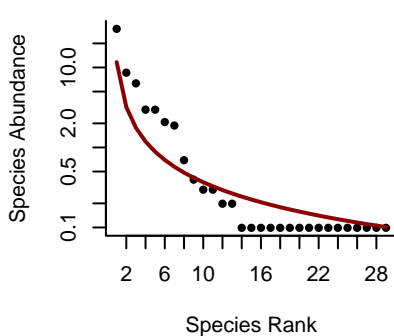**WAAPIL0010-57607**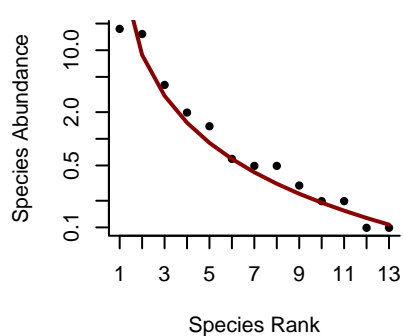**WAAPIL0011-57608**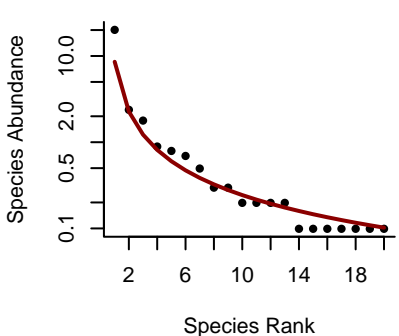**WAAPIL0012-57609**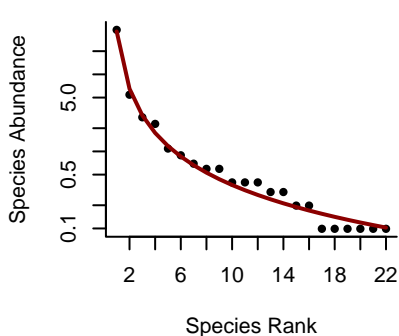**WAAPIL0013-57610**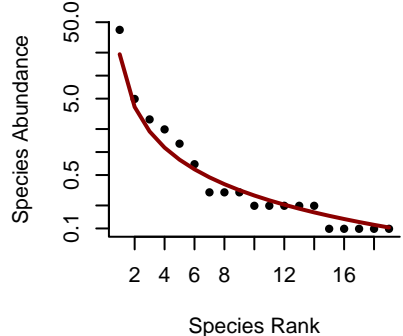**WAGCOO0001-53613**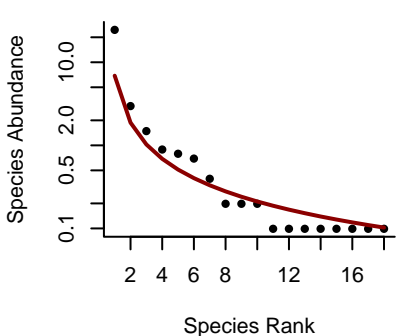**WAGCOO0002-53614**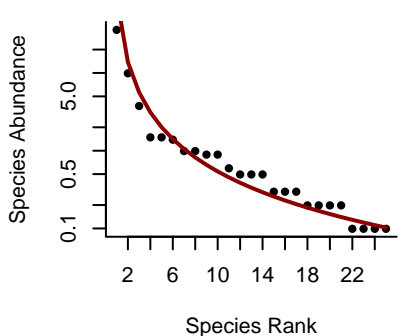**WAGCOO0004-53615**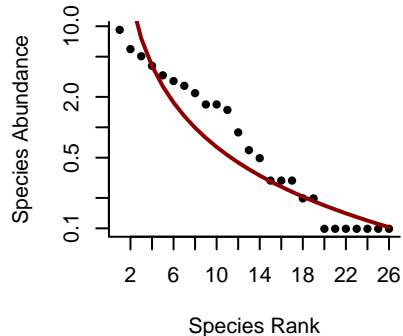

Supplement: pone.0170137.s004.pdf [file pone.0170137.s004.pdf]
