# Supplementary material for: Opportunities for Integrated Ecological Analysis across Inland Australia with Standardised Data from Ausplots Rangelands
Source: PubMed Central journal article supplement (PMC5241013; doi:10.1371/journal.pone.0170137), 2017-01-17
Supplement: pone.0170137.s003.pdf [file pone.0170137.s003.pdf]

### NSABHC0001-53596

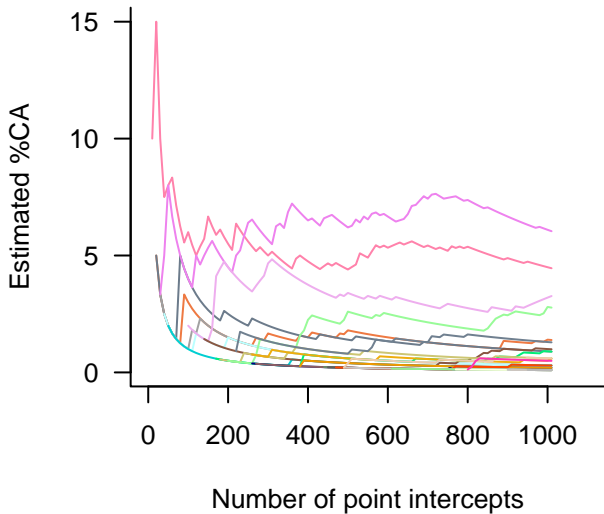

### NSABHC0002-53597

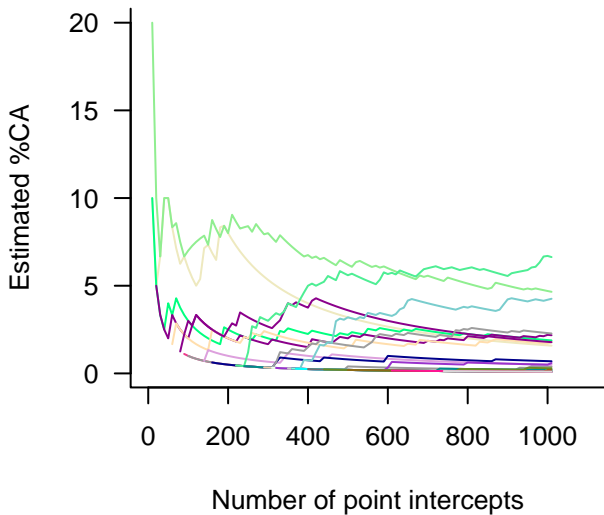

### NSABHC0003-53598

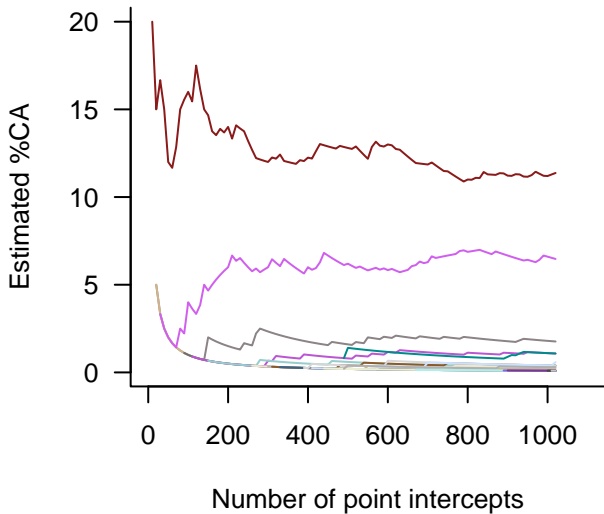

### NSABHC0004-53599

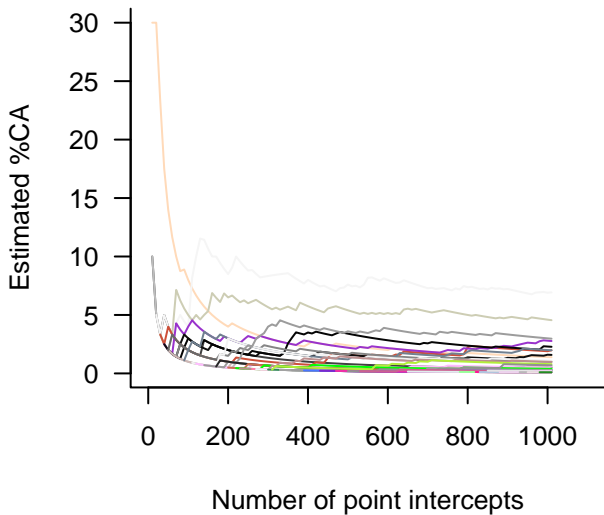

### NSABHC0005-53600

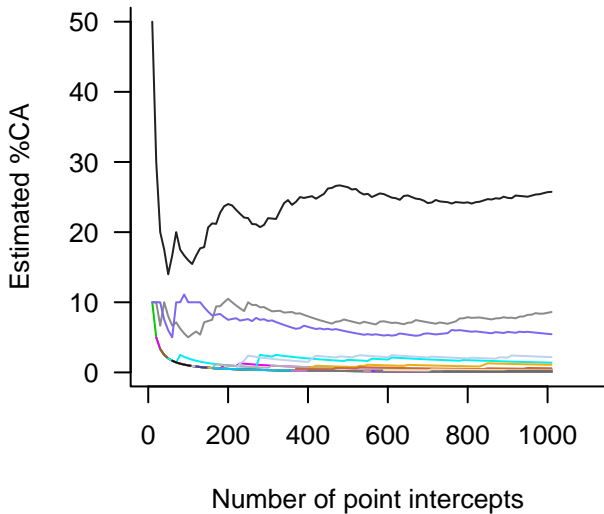

- *Astrebla pectinata*
- *Enneapogon avenaceus*
- *Sida intricata*
- *Bothriochloa macra*
- *Carrichtera annua*

### NSABHC0006-53601

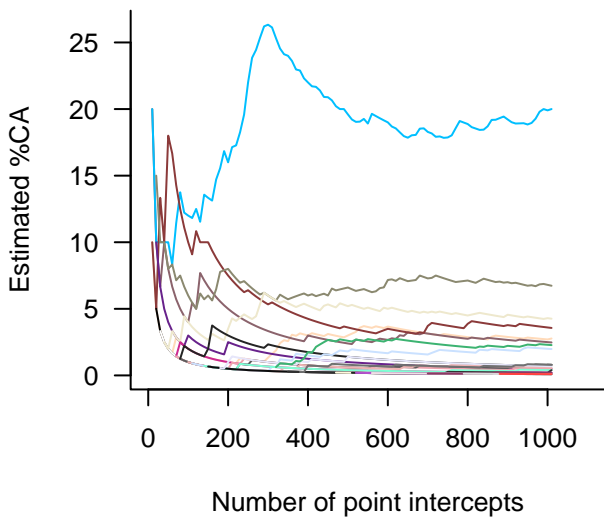

- *Enneapogon avenaceus*
- *Sclerolaena longicuspis*
- *Sclerolaena divaricata*
- *Astrebla pectinata*
- *Atriplex vesicaria*

### NSABHC0007-53602

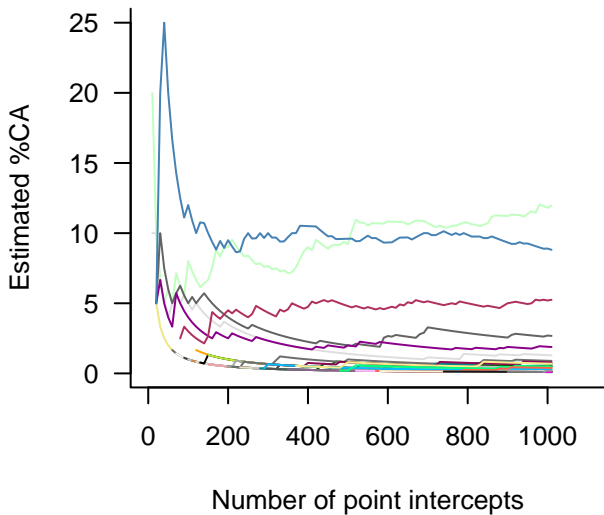

- Enneapogon avenaceus*
- Atriplex vesicaria*
- Maireana astrotricha*
- Sida intricata*
- Malacocera tricornis*

### NSABHC0008-53603

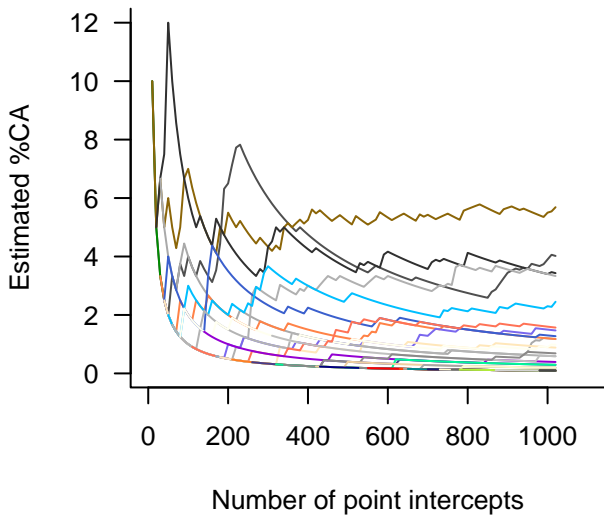

- Maireana pyramidata*
- Atriplex vesicaria*
- Rhagodia spinescens*
- Enneapogon avenaceus*
- Sarcozona praecox*

### NSABHC0009-53604

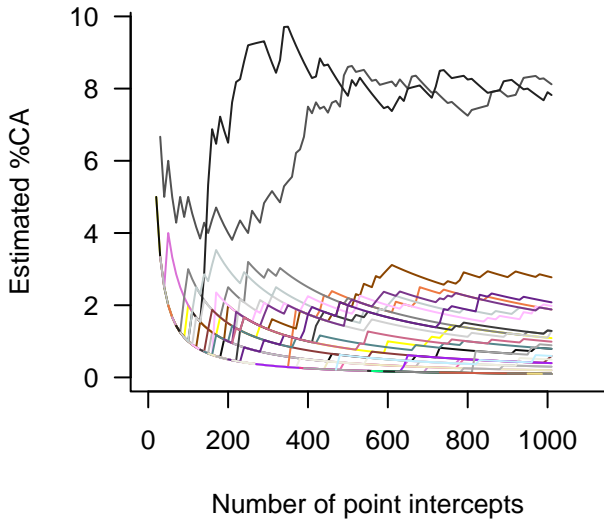

- *Atriplex vesicaria*
- *Enneapogon avenaceus*
- *Sclerolaena ventricosa*
- *Sonchus oleraceus*
- *Panicum decompositum*

### NSABHC0010-53605

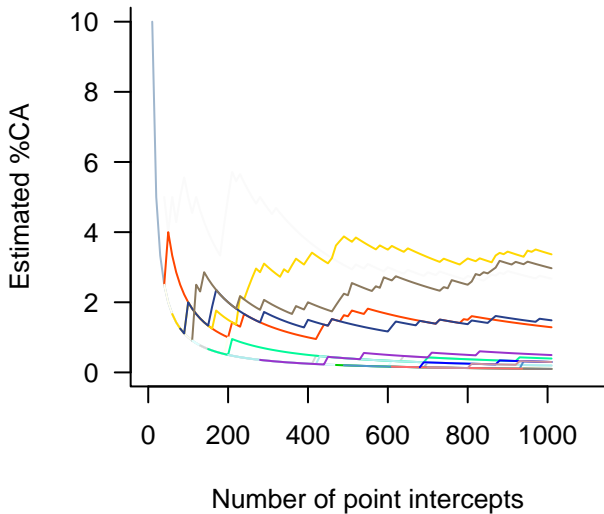

- *Maireana astrotricha*
- *Enneapogon avenaceus*
- *Sclerolaena ventricosa*
- *Maireana pyramidata*
- *Lotus cruentus*

### NSABHC0011-53606

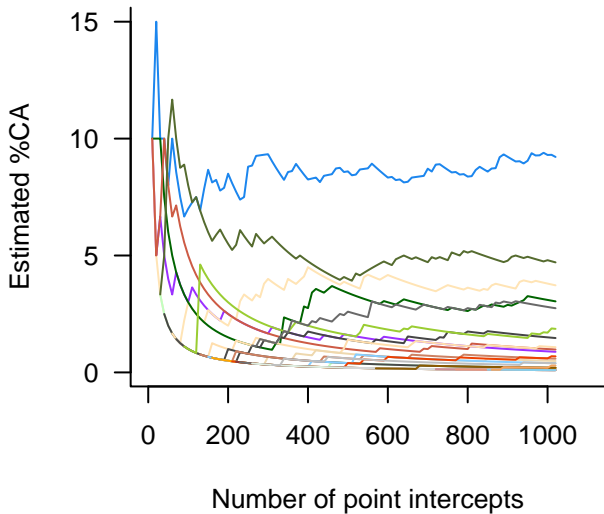

### NSABHC0012-53607

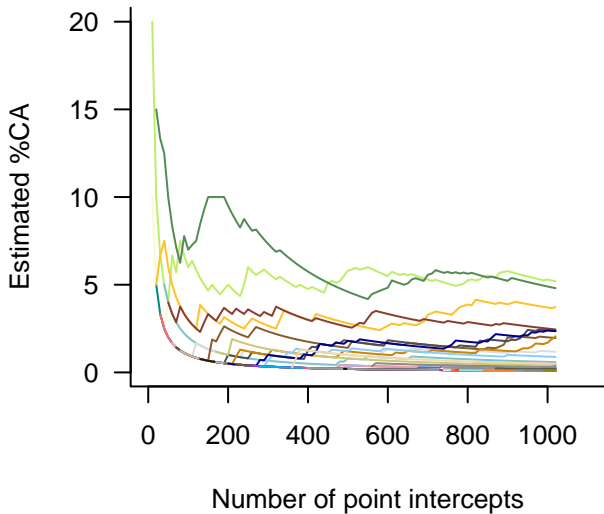

### NSABHC0013-53608

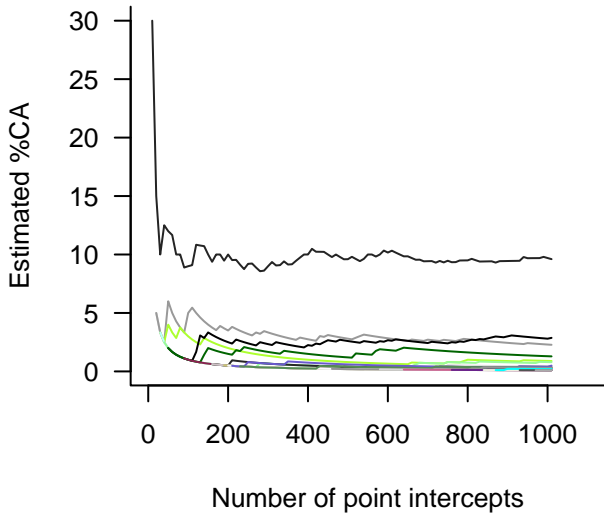

- Austrostipa scabra
- Maireana pyramidata
- Atriplex vesicaria
- Zygotyllum ammophilum
- Eragrostis dielsii

### NSABHC0014-53609

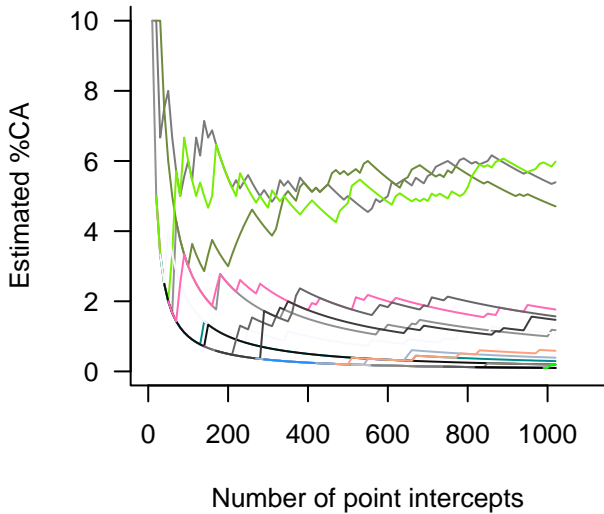

- Maireana pyramidata
- Enneapogon avenaceus
- Aristida contorta
- Cymbopogon ambiguus
- Lotus cruentus

### NSABHC0015-57104

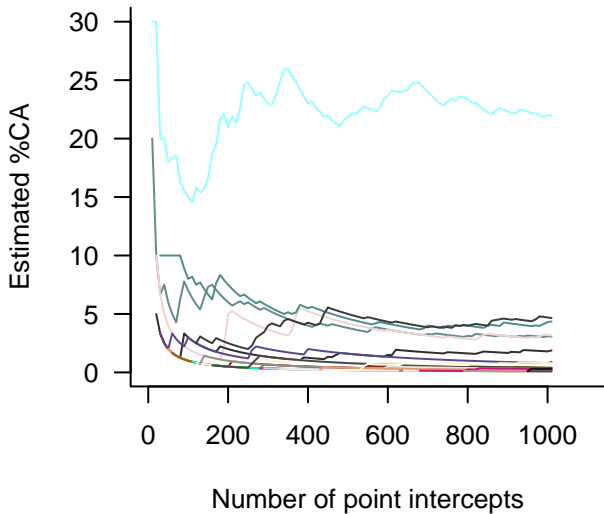

- Enneapogon avenaceus
- Dissocarpus biflorus var. biflorus
- Atriplex vesicaria
- Bothriochloa spp.
- Sclerolaena lanicuspis

### NSABHC0016-57105

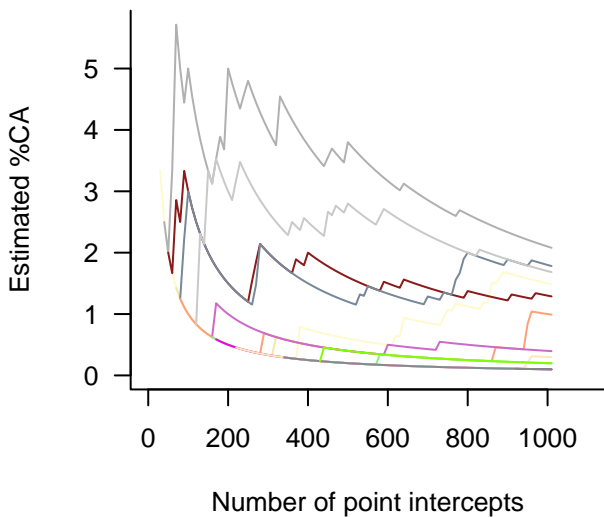

- Sida intricata
- Maireana turbinata
- Maireana astrotricha
- Sclerolaena lanicuspis
- Sclerolaena divaricata



### NSABHC0017-57106

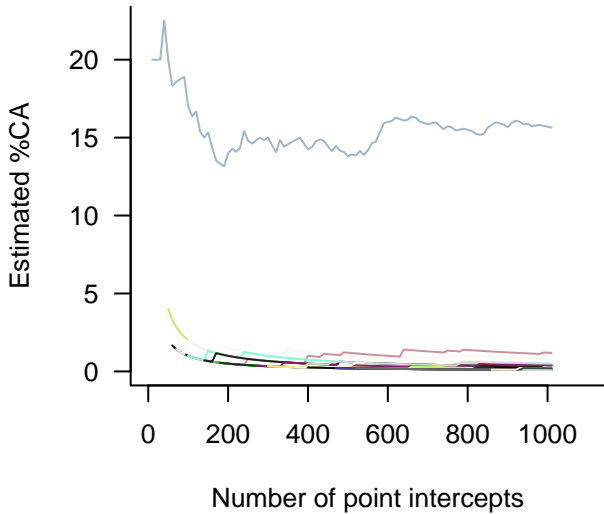

### NSABHC0018-57077

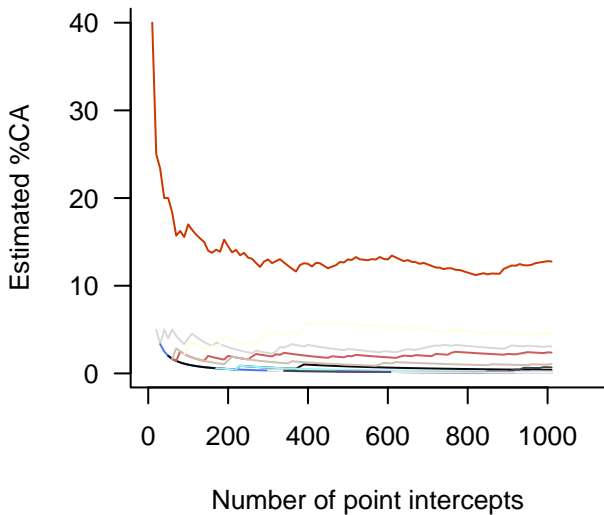

### NSABHC0019-57078

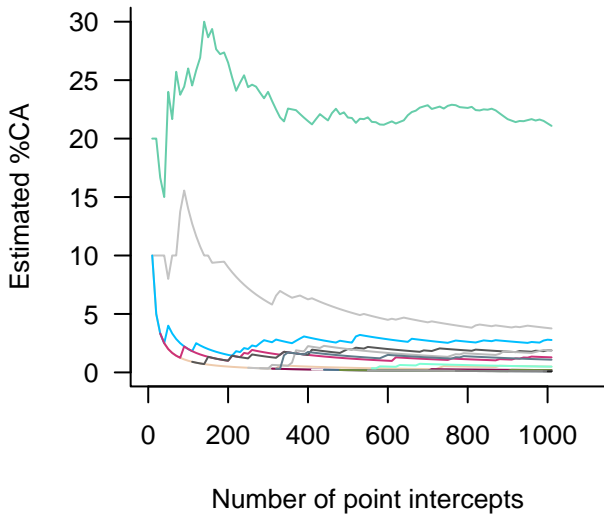

### NSABHC0020-57599

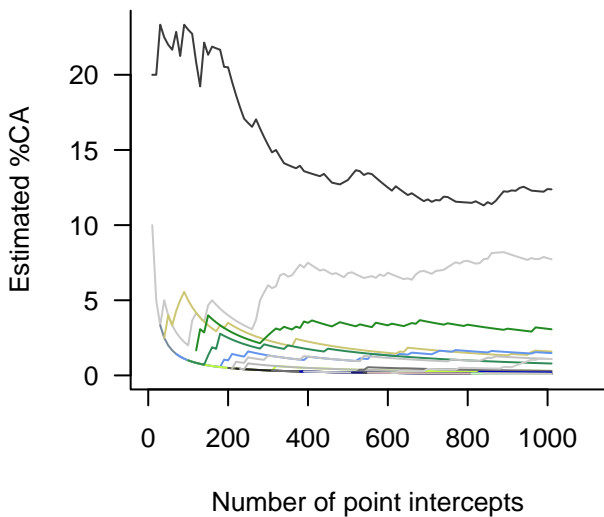

### NSABHC0021-57098

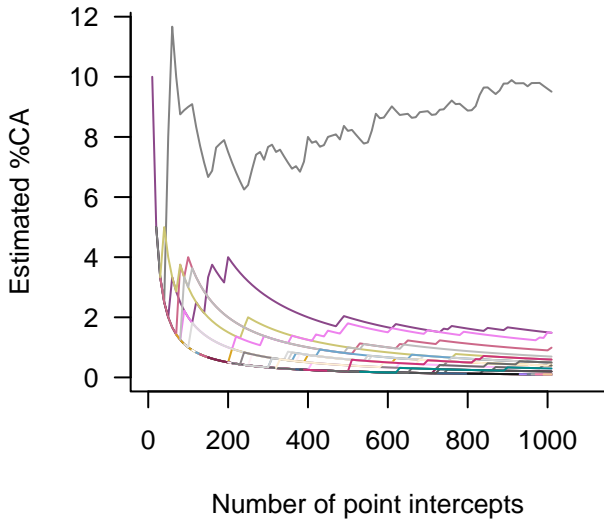

### NSABHC0025-57101

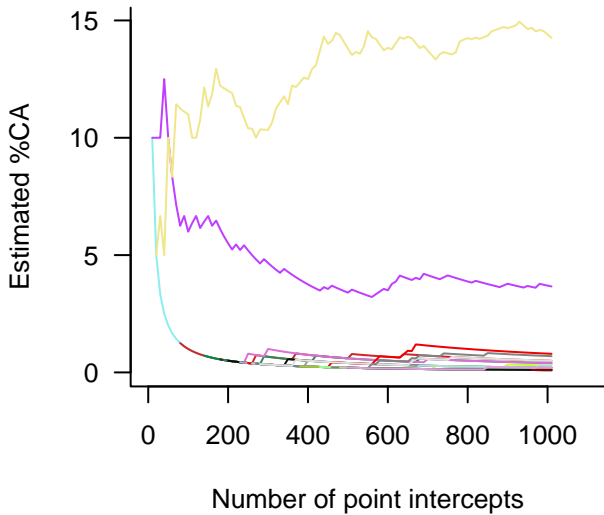

## NSABHC0026-57102

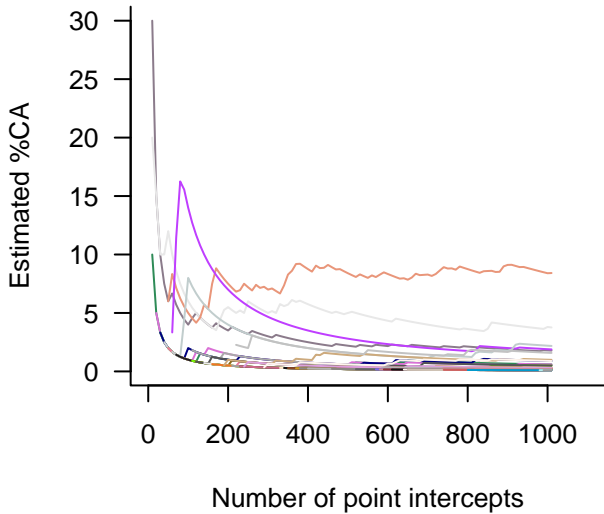

## NSAMDD0001-56965

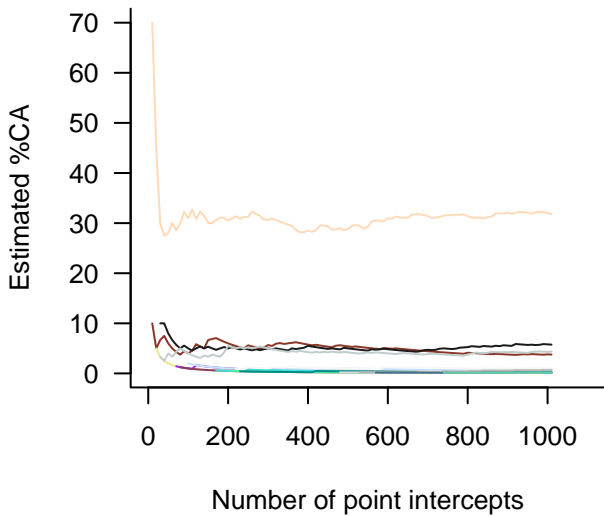

### NSAMDD0002-56952

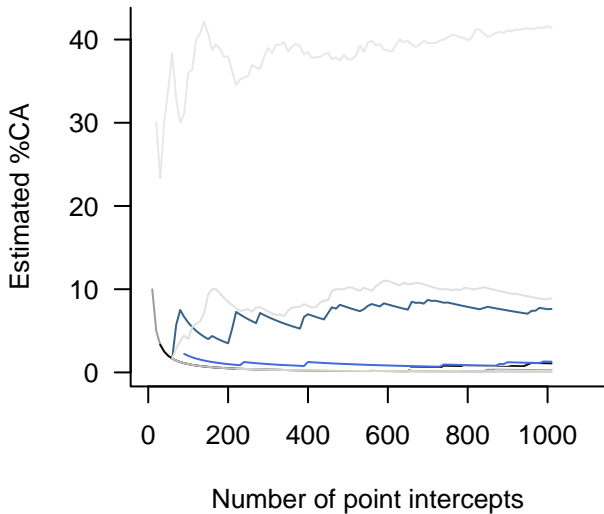

- Eucalyptus dumosa*
- Triodia scariosa*
- Eucalyptus oleosa*
- Enchylaena tomentosa*
- Chenopodium curvispicatum*

### NSAMDD0003-56968

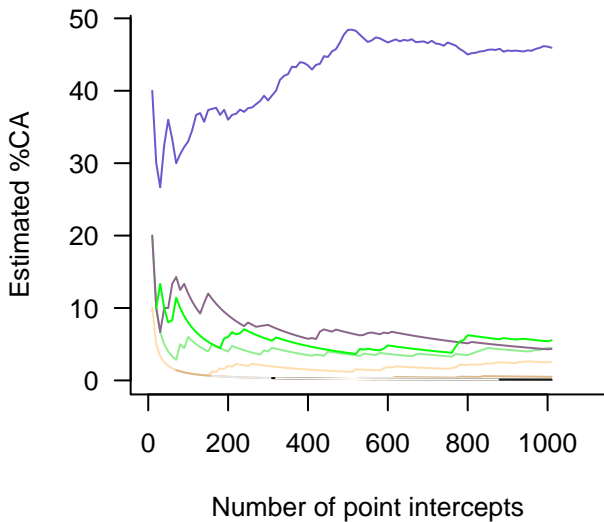

- Dodonaea viscosa* subsp. *angus*
- Carrichtera annua*
- Chenopodium curvispicatum*
- Chenopodiaceae* sp.
- Enchylaena tomentosa*

### NSAMDD0004-56953

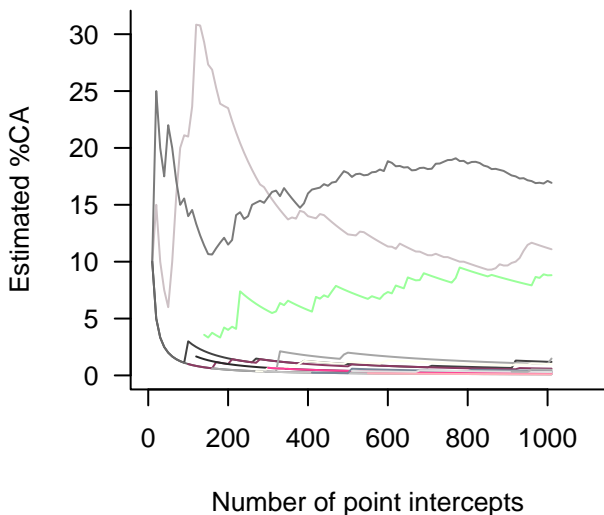

- *Atriplex vesicaria* subsp. *vesicaria*
- *Carrichtera annua*
- *Casuarina pauper*
- *Alectryon oleifolius* subsp. *canescens*
- *Dodonaea viscosa* subsp. *angustata*

### NSAMDD0005-56969

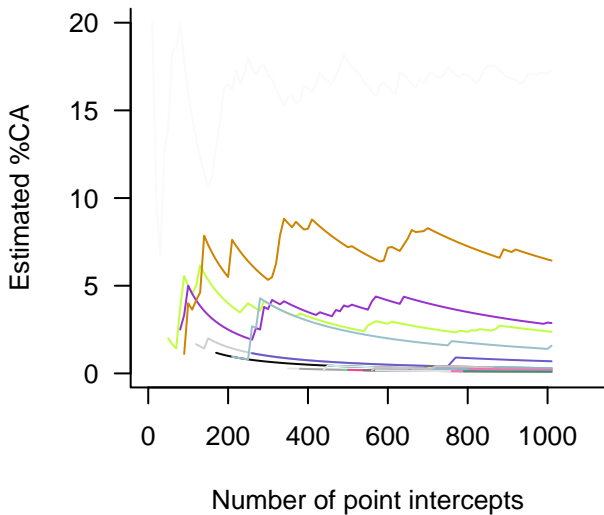

- *Eucalyptus dumosa* subsp. *dumosa*
- *Eucalyptus socialis*
- *Enchylaena tomentosa*
- *Zygophyllum* sp.
- *Eremophila longifolia*

### NSAMDD0006-56954

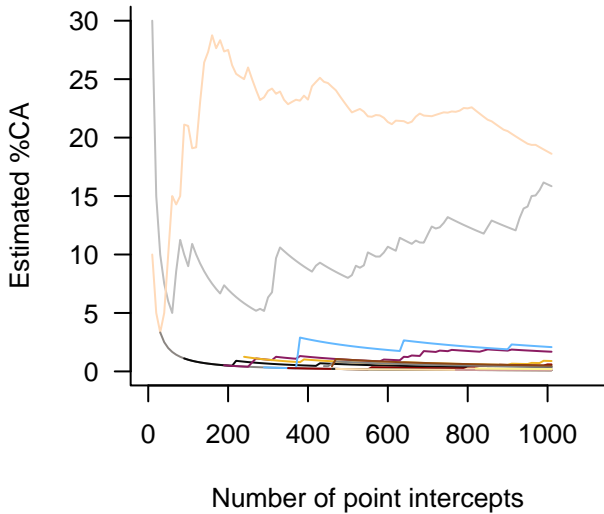

- Maireana pyramidata*
- Casuarina pauper*
- Alectryon oleifolius* subsp. *canes*
- Rhagodia spinescens*
- Enchylaena tomentosa*

### NSAMDD0007-56970

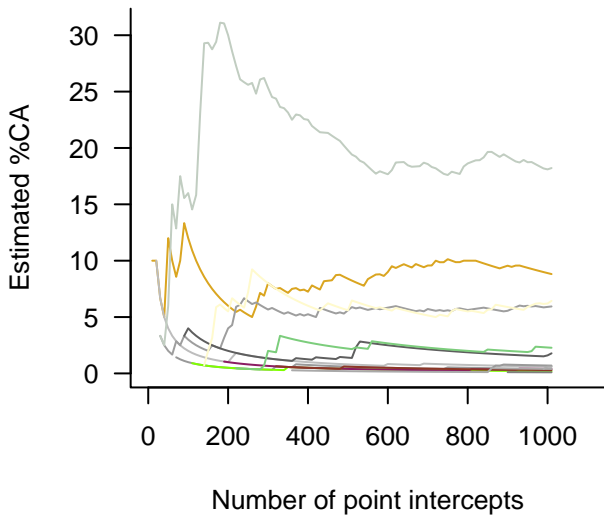

- Beyeria opaca*
- Eucalyptus dumosa*
- Eucalyptus socialis*
- Triodia scariosa*
- Acacia colletioides*

### NSAMDD0008-56955

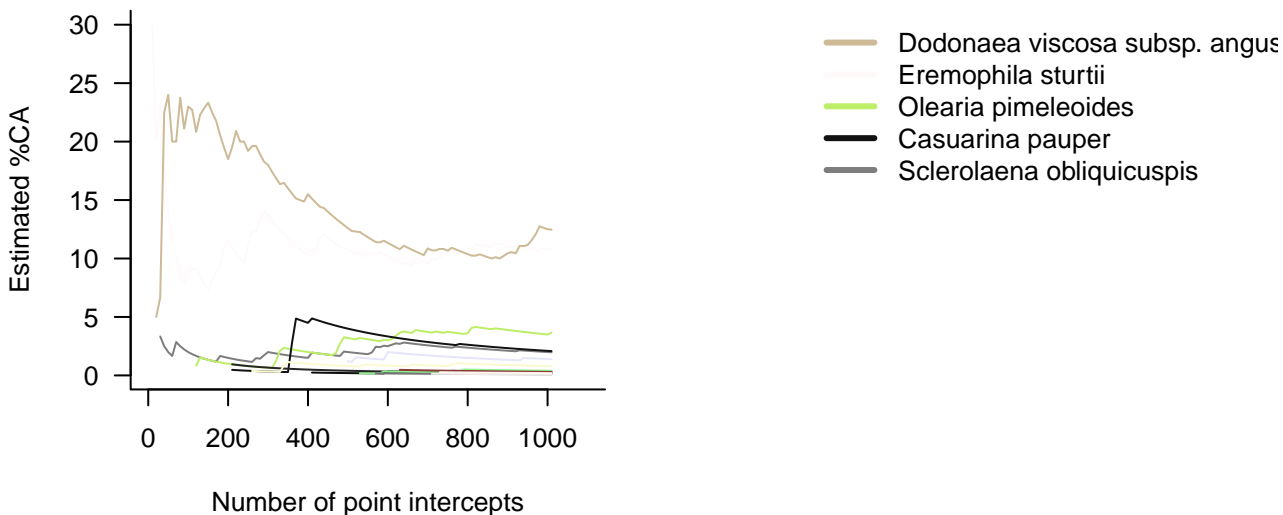

### NSAMDD0009-56971

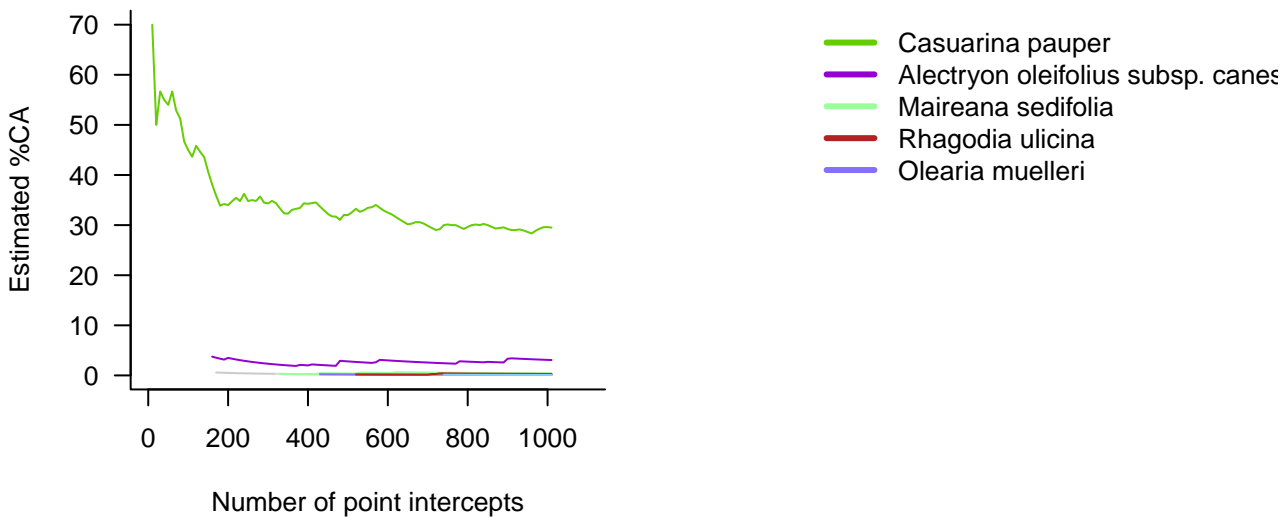



### NSAMDD0010-56956

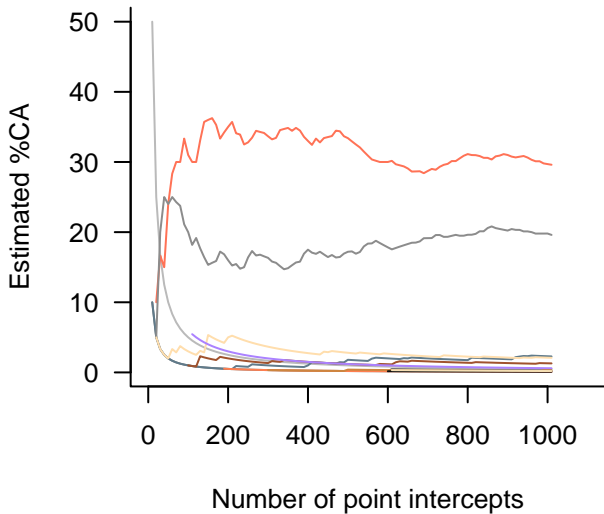

- Salvia verbenaca*
- Sclerolaena obliquicuspis*
- Dysphania cristata*
- Medicago minima*
- Euphorbia dallachyana*

### NSAMDD0011-56981

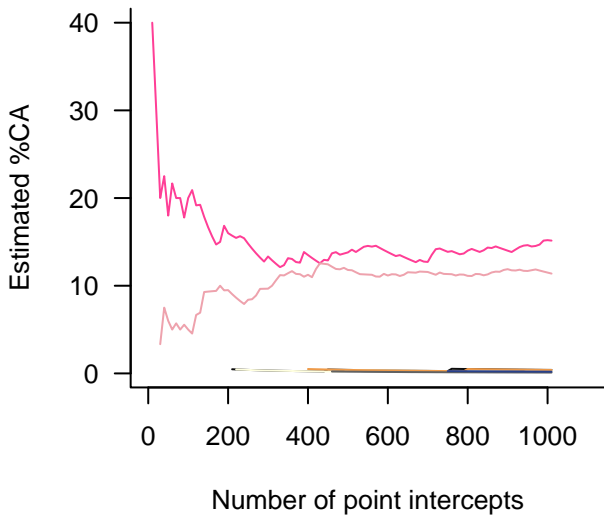

- Eucalyptus dumosa*
- Triodia scariosa*
- Dodonaea viscosa* subsp. *angustata*
- Beyeria opaca*
- Eremophila deserti*

### NSAMDD0012-56957

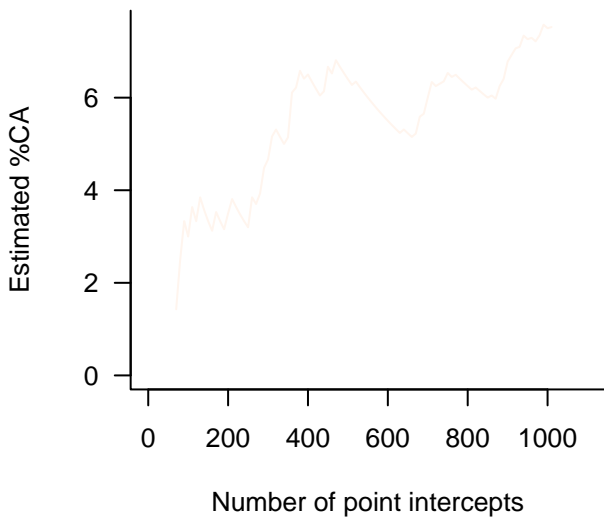

Tecticornia lylei

### NSAMDD0013-56982

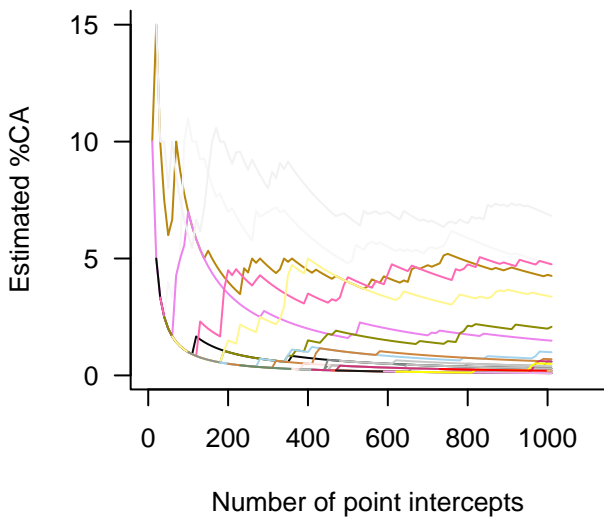

- Eucalyptus dumosa
- Triodia scariosa
- Eucalyptus gracilis
- Calandrinia sp.
- Chenopodium curvispicatum

### NSAMDD0014-56963

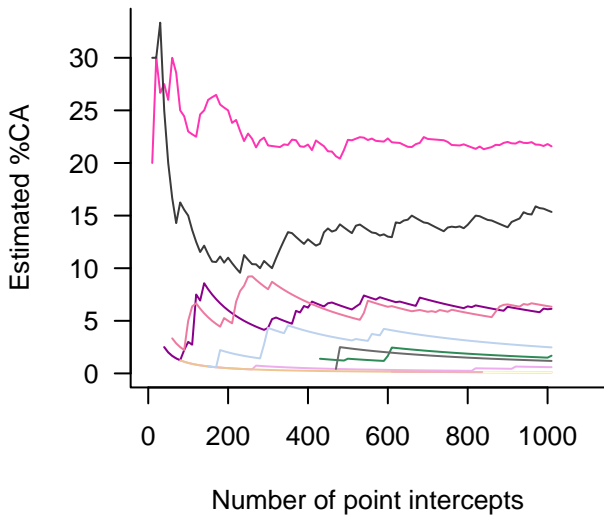

- Triodia scariosa
- Eucalyptus socialis
- Eucalyptus dumosa
- Eucalyptus incrassata
- Myoporum platycarpum subsp. r

### NSAMDD0015-57636

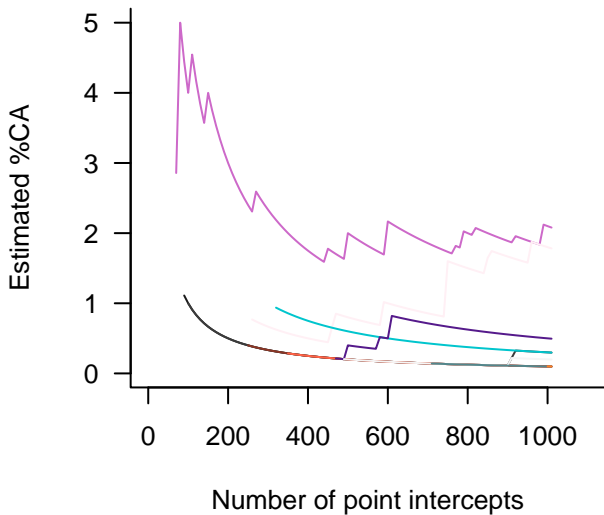

- Eremophila sturtii
- Alectryon oleifolius subsp. canescens
- Senna artemisioides subsp. x cc
- Senna artemisioides subsp. x pe
- Acacia oswaldii

### NSAMDD0016-56973

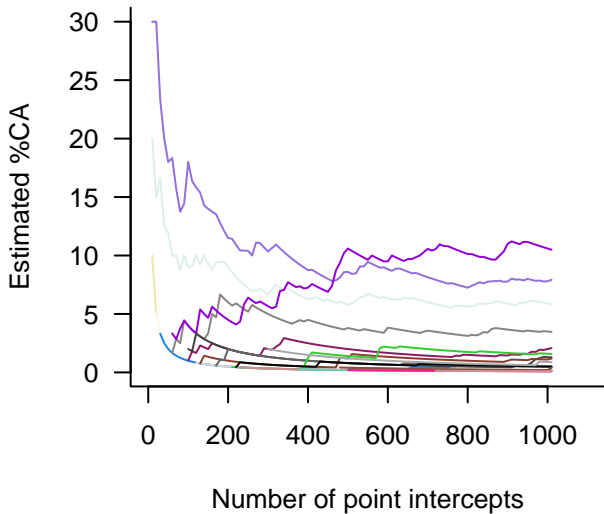

- Salvia verbenaca*
- Euphorbia dallachyana*
- Sclerolaena obliquicuspis*
- No id
- Ptilotus obovatus* var. *obovatus*

### NSAMDD0017-57080

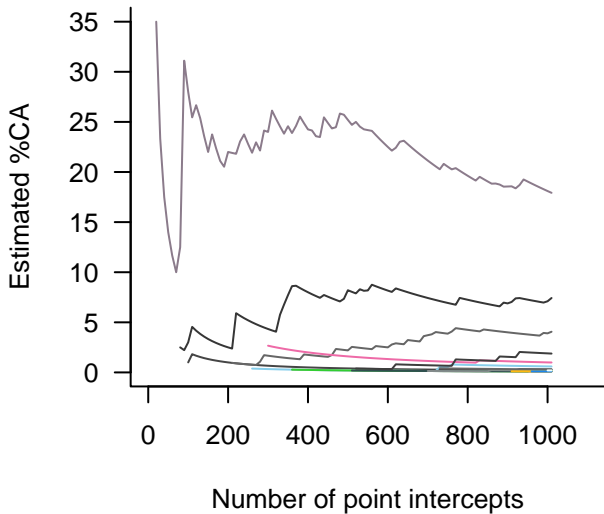

- Casuarina pauper*
- Geijera parviflora*
- Alectryon oleifolius* subsp. *elong*
- Brassicaceae* sp.
- Apophyllum anomalum*

### NSAMDD0018-56976

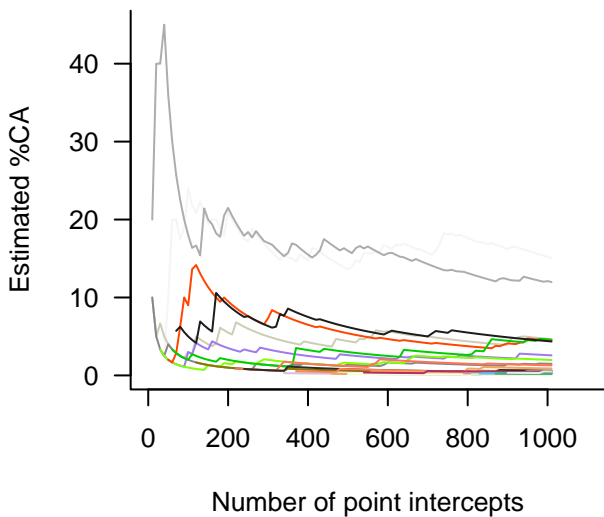

- Eucalyptus socialis*
- Eucalyptus dumosa* subsp. *dumosa*
- Eucalyptus gracilis*
- Melaleuca uncinata*
- Acacia colletioides*

### NSAMDD0019-57081

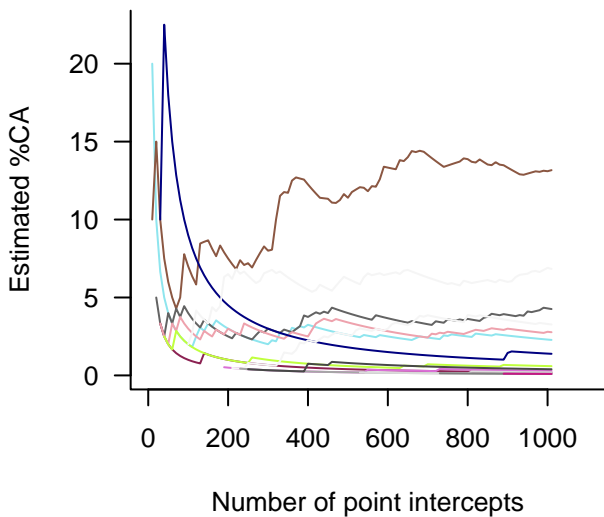

- Aristida jerichoensis* var. *subspira*
- Erodium* sp.
- Rhodanthe diffusa* subsp. *diffusa*
- Aristida behriana*
- Echium plantagineum*

### NSAMDD0020-56984

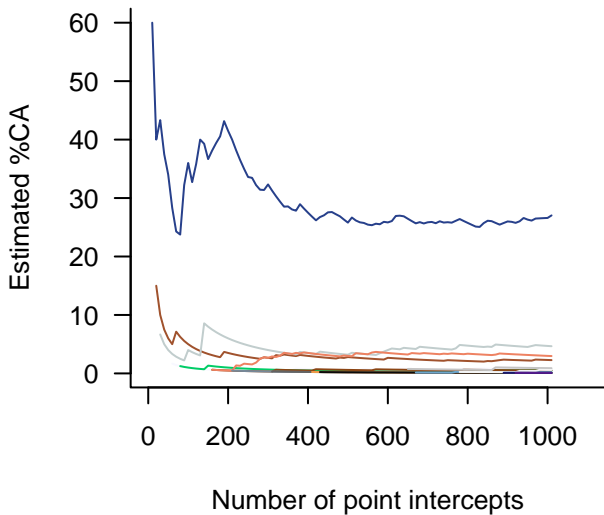

### NSAMDD0021-57082

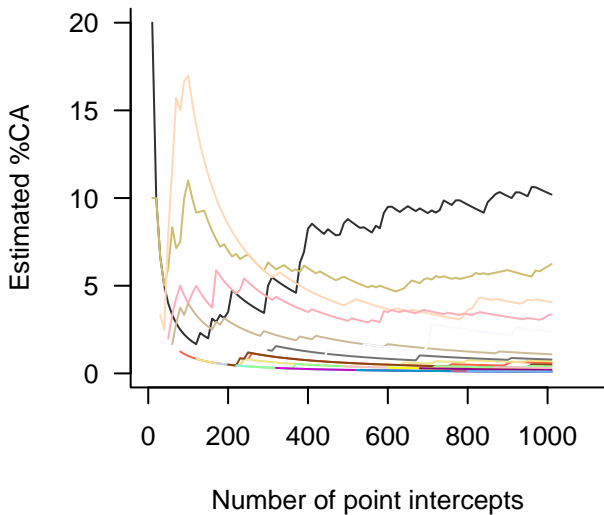

### NSAMDD0022-56985

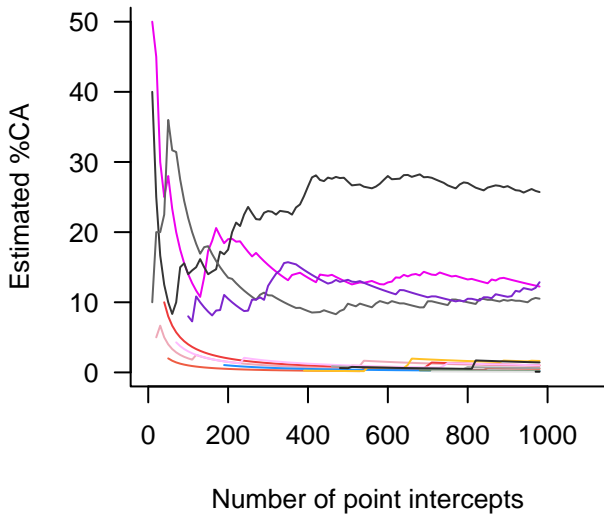

### NSAMDD0023-57083

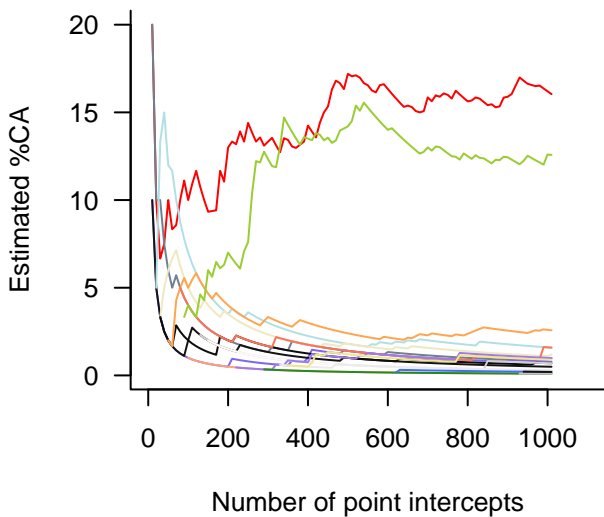

### NSAMDD0024-56986

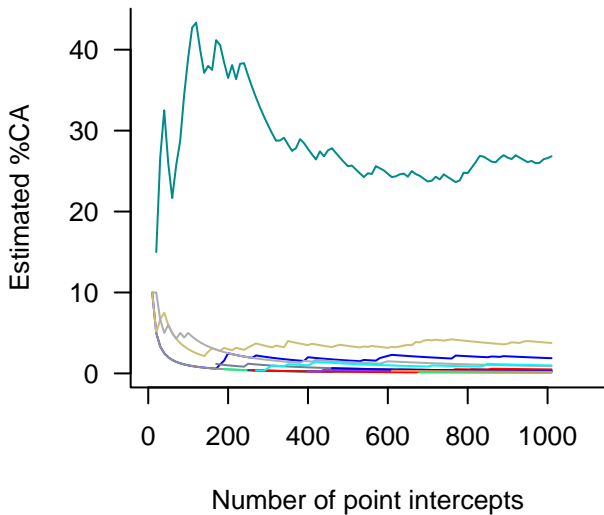

- Acacia brachystachya*
- Poaceae sp.*
- Medicago laciniata*
- No id*
- Hyalospermum semisterile*

### NSAMDD0025-57084

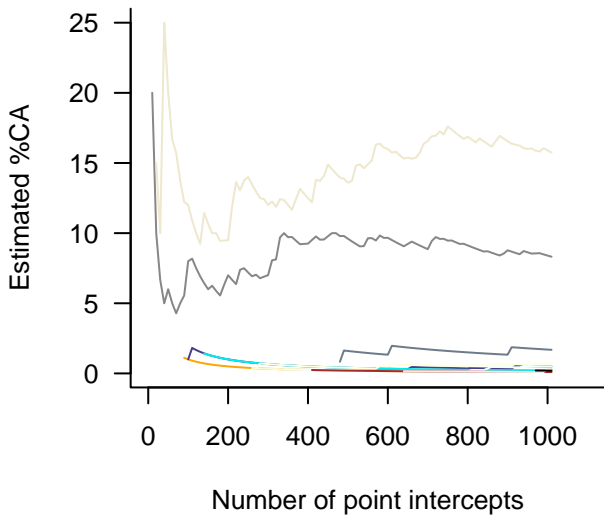

- Eucalyptus populnea*
- Centipeda thespidioides*
- Alectryon oleifolius subsp. elong*
- Oxalis sp.*
- Enchylaena tomentosa*



### NSAMDD0026-56987

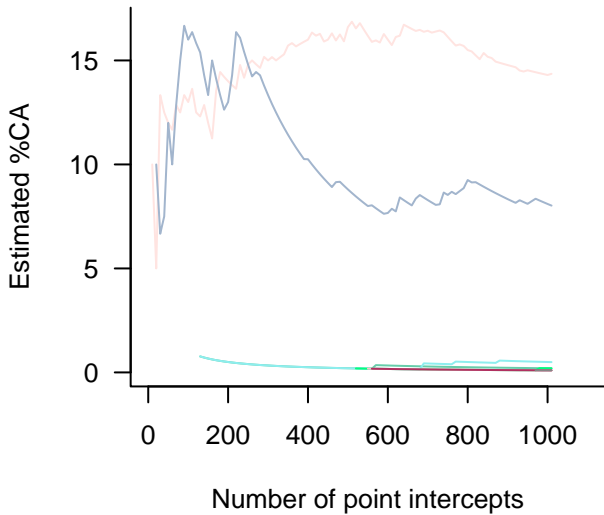

### NSAMDD0027-57087

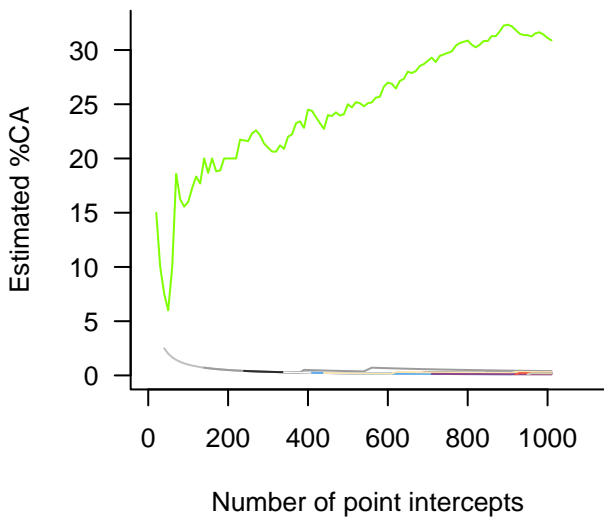

### NSAMDD0028-56988

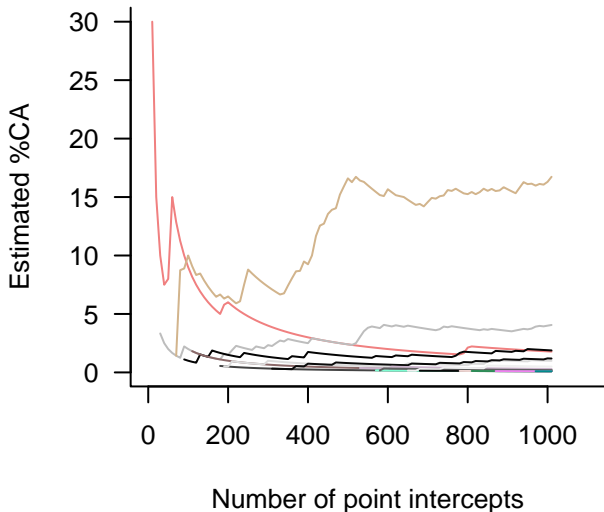

- Dodonaea viscosa* subsp. *angus*
- Maireana triptera*
- Maireana integra*
- Eremophila longifolia*
- Sclerolaena diacantha*

### NSAMDD0029-57088

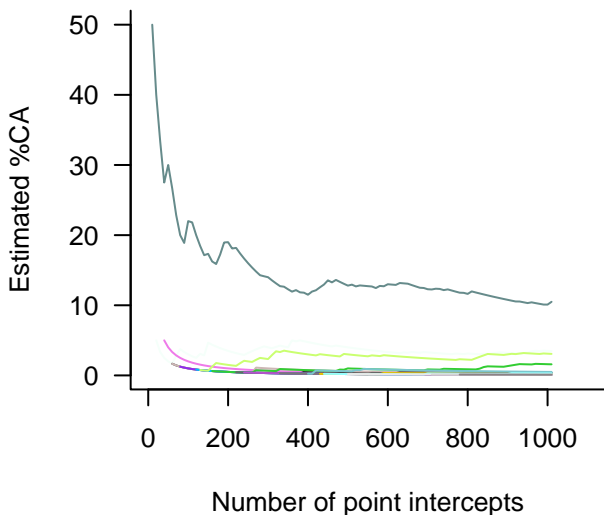

- Dodonaea viscosa* subsp. *angus*
- Eriochiton sclerolaenoides*
- Enneapogon intermedius*
- Euphorbia drummondii*
- Dissocarpus paradoxus*

### NSAMDD0030-56989

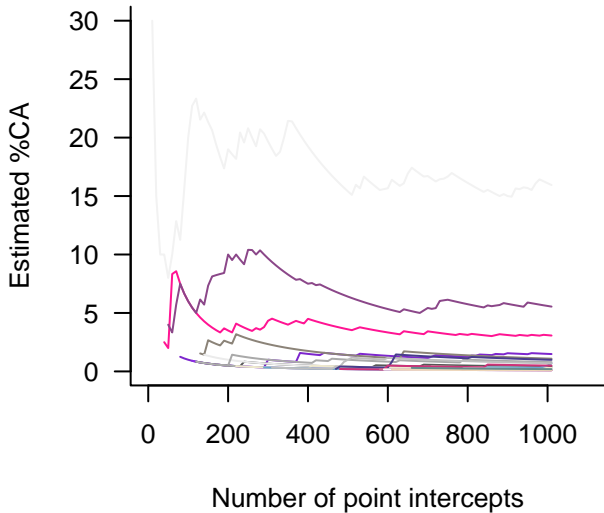

- Eucalyptus populnea*
- Dysphania cristata*
- Dissocarpus paradoxus*
- Sclerolaena obliquicuspis*
- Enchylaena tomentosa*

### NTABRT0001-53616

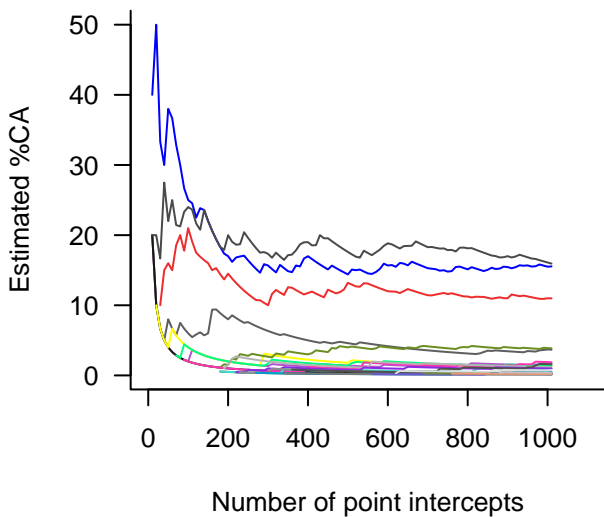

- Thyridolepis mitchelliana*
- Acacia aneura*
- Acacia aptaneura*
- Eremophila latrobei* subsp. *glabra*
- Eragrostis eriopoda* subsp. *red e*

### NTABRT0002-53617

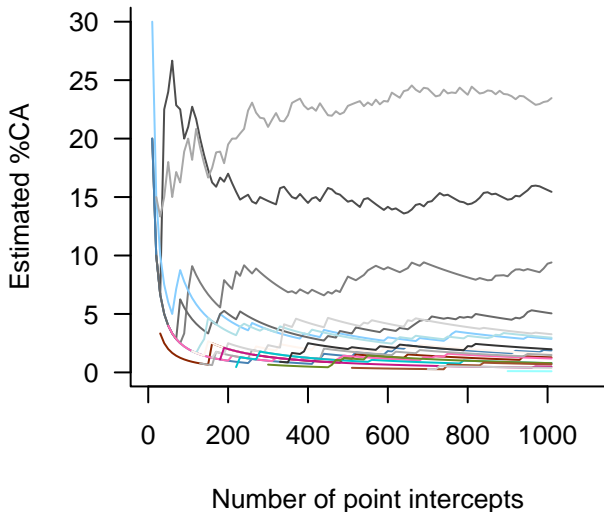

- *Acacia aneura*
- *Acacia aptaneura*
- *Thyridolepis mitchelliana*
- *Eremophila latrobei* subsp. *glabr*
- *Hibiscus sturtii* var. *grandiflorus*

### NTABRT0003-53618

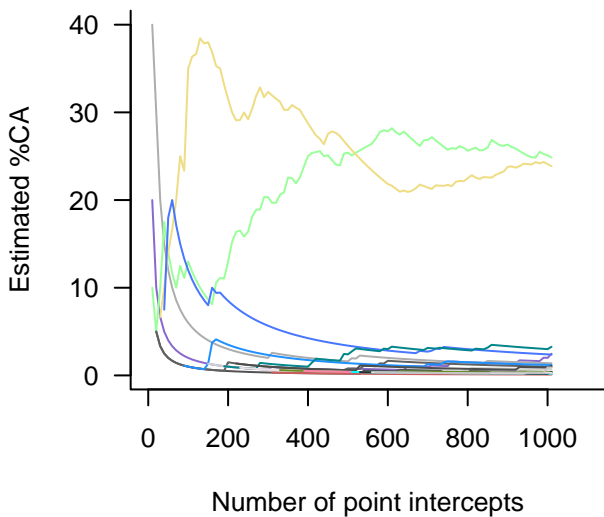

- *Acacia aneura*
- *Triodia schinzii*
- *Thyridolepis mitchelliana*
- *Acacia aptaneura*
- *Acacia kempeana*

### NTABRT0004-53619

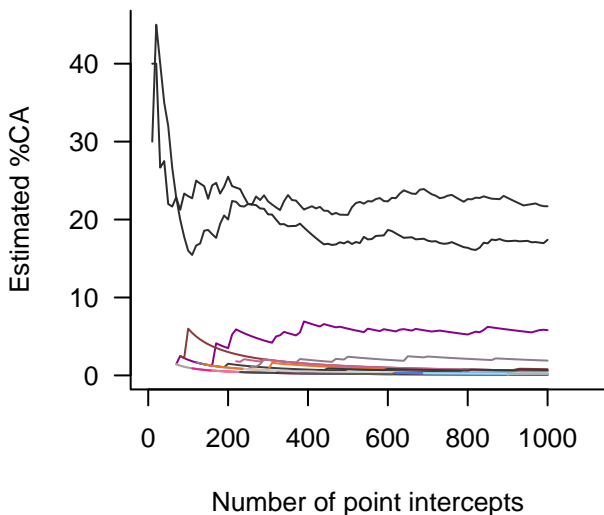

- *Acacia aptaneura*
- *Aristida holathera*
- *Triodia schinzii*
- *Eremophila latrobei* subsp. *glabr*
- *Eriachne helmsii*

### NTABRT0005-53620

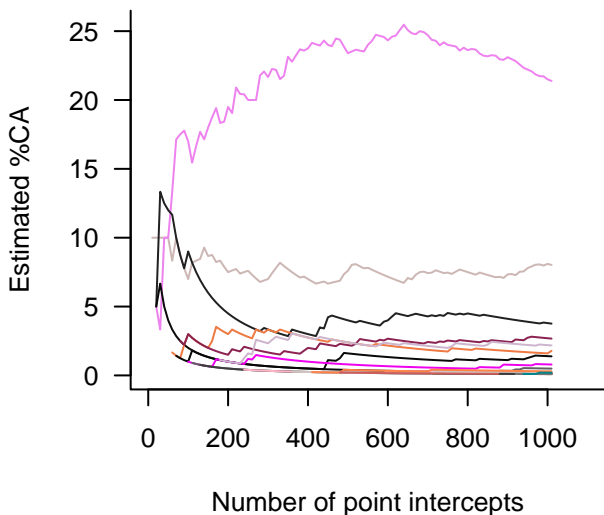

- *Triodia schinzii*
- *Paraneurachne muelleri*
- *Eragrostis eriopoda* subsp. *red e*
- *Aristida holathera*
- *Scaevola parvifolia*

### NTABRT0006-53621

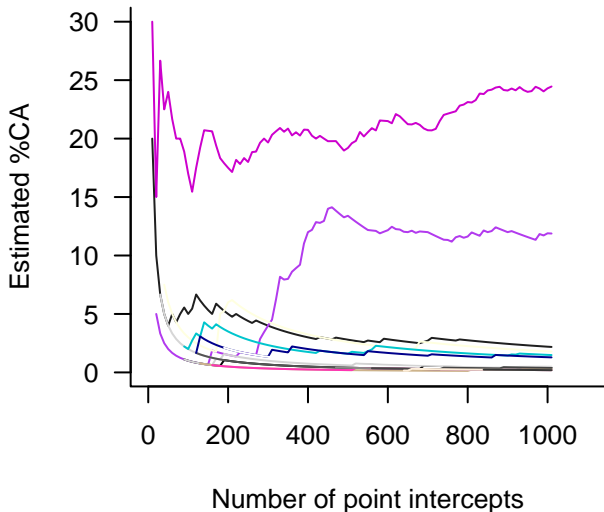

- Acacia aptaneura
- Paraneurachne muelleri
- Aristida obscura
- Triodia schinzii
- Eremophila latrobei subsp. glabr

### NTADAC0001-53518

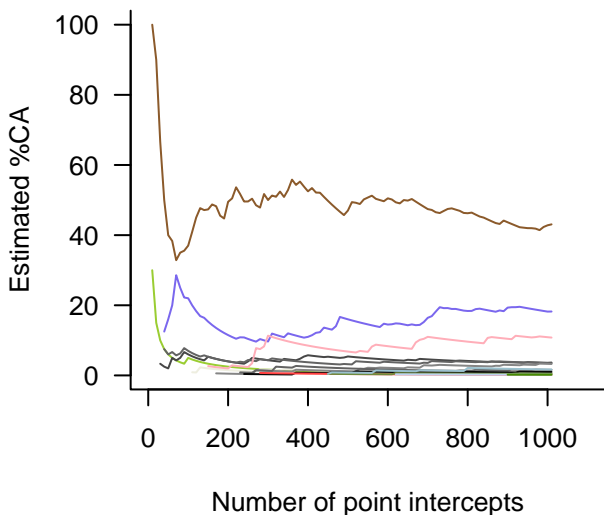

- Eucalyptus tetrodonta
- Eucalyptus miniata
- Erythrophleum chlorostachys
- Petalostigma quadriloculare
- Grevillea pluricaulis

### NTAFIN0001-53519

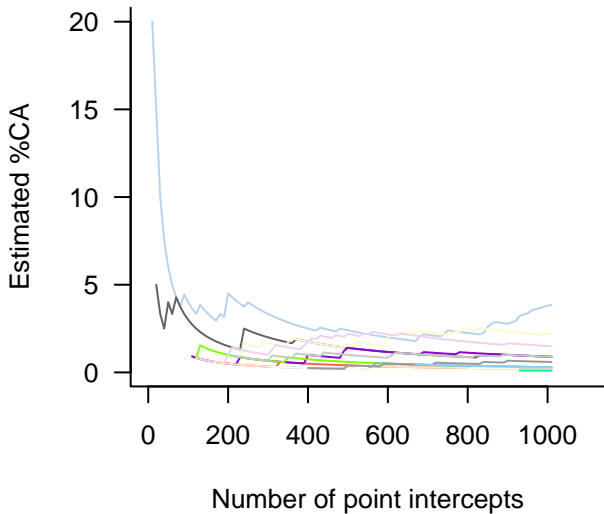

- Cenchrus ciliaris*
- Polycalymma stuartii*
- Fimbristylis dichotoma*
- Eragrostis eriopoda* subsp. sand
- Acacia murrayana*

### NTAFIN0002-53622

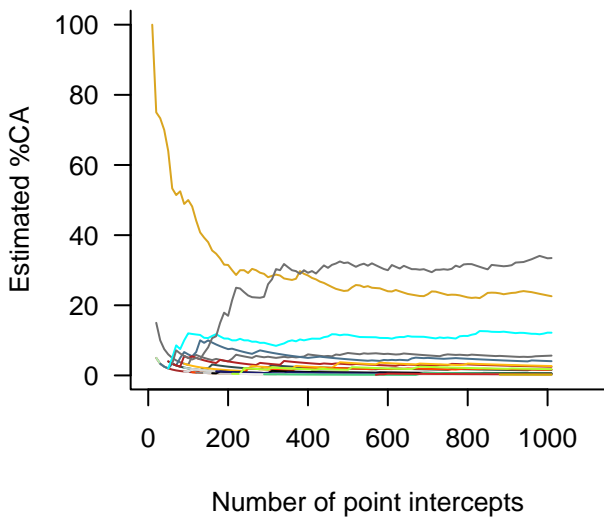

- Acacia estrophiolata*
- Cenchrus ciliaris*
- Aristida holathera*
- Eragrostis eriopoda*
- Enneapogon avenaceus*

### NTAFIN0003-53623

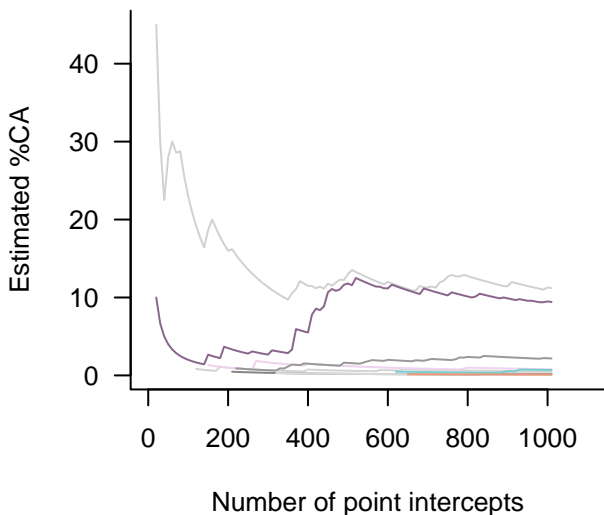

- Eucalyptus camaldulensis
- Cynodon dactylon
- Aristida holathera
- Cenchrus ciliaris
- Melaleuca glomerata

### NTAFIN0004-53624

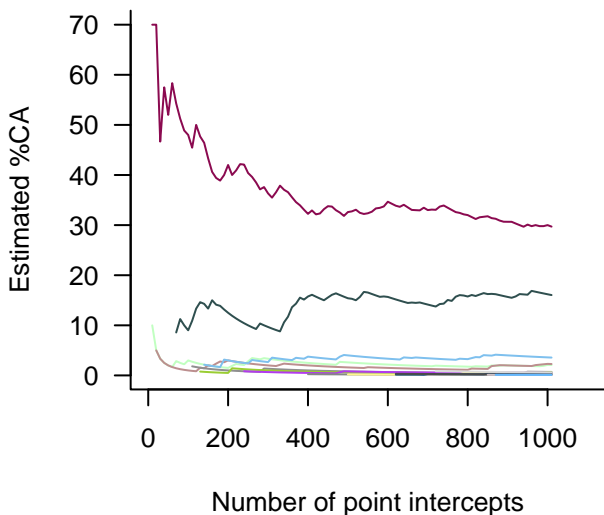

- Acacia kempeana
- Acacia aneura
- Abutilon sp.
- Eremophila freelingii
- Euphorbia centralis



### NTAFIN0005-53625

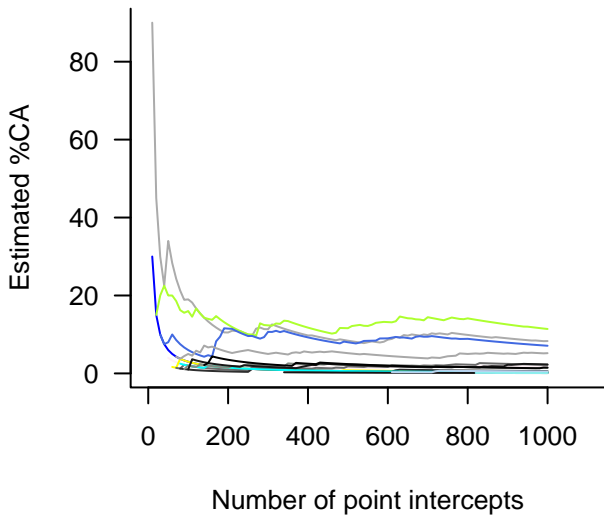

### NTAFIN0006-53626

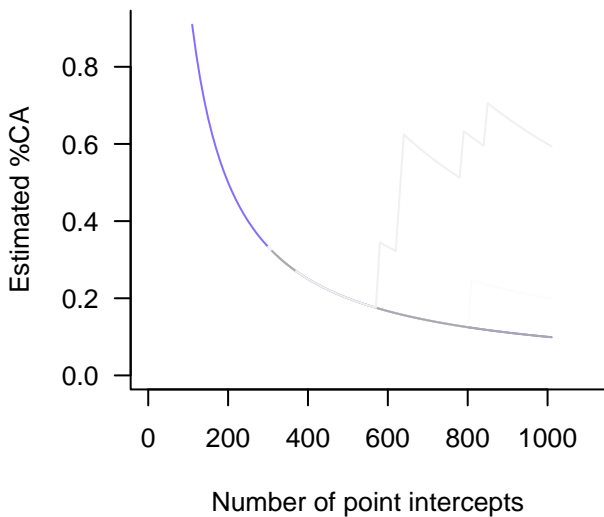

### NTAFIN0007-53627

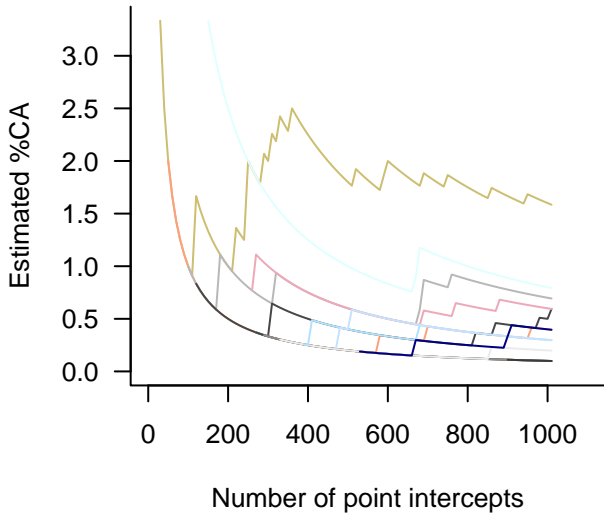

- Ptilotus sessilifolius*
- Acacia tetragonophylla*
- Enneapogon cylindricus*
- Sida fibulifera*
- Enneapogon avenaceus*

### NTAFIN0008-53628

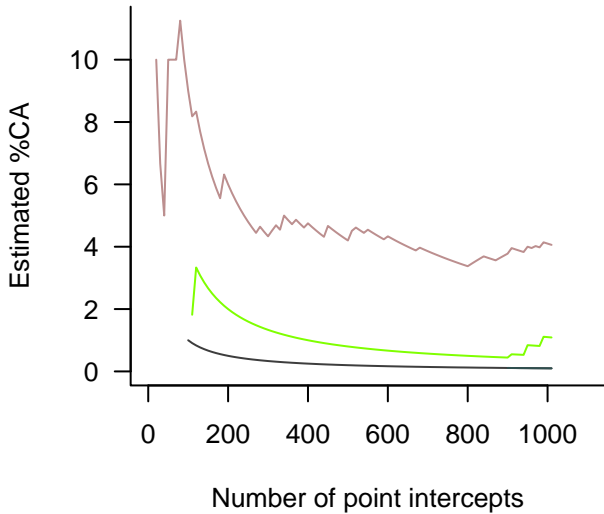

- Cenchrus ciliaris*
- Acacia victoriae*
- Cynodon dactylon*
- Enneapogon avenaceus*

### NTAFIN0009-53629

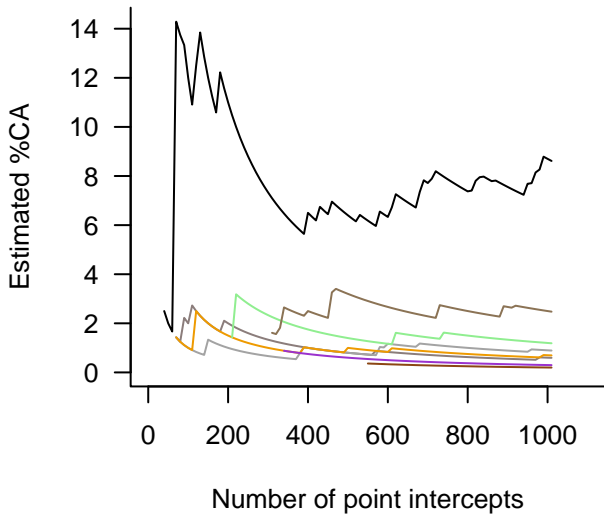

### NTAFIN0010-53630

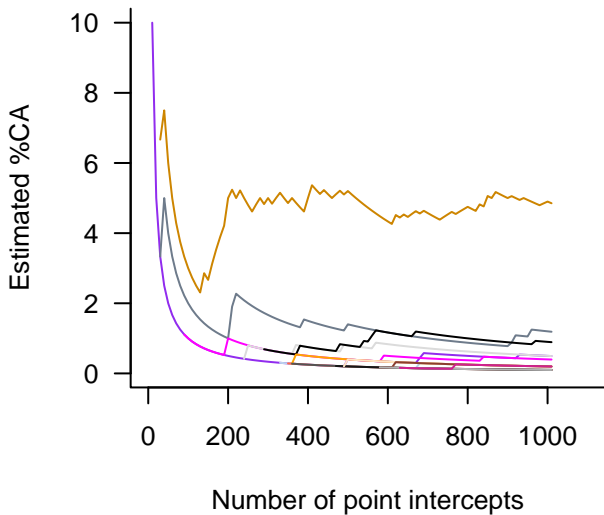

### NTAFIN0011-53631

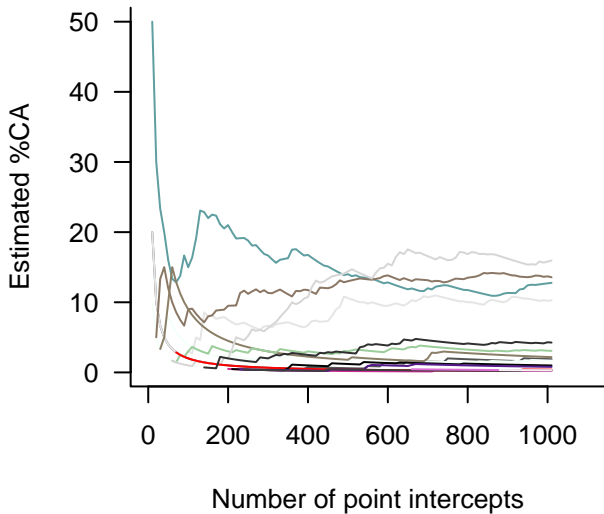

- Acacia aptaneura
- Triodia basedowii
- Eragrostis eriopoda subsp. red e
- Aristida holathera
- Ptilotus polystachyus

### NTAFIN0012-53632

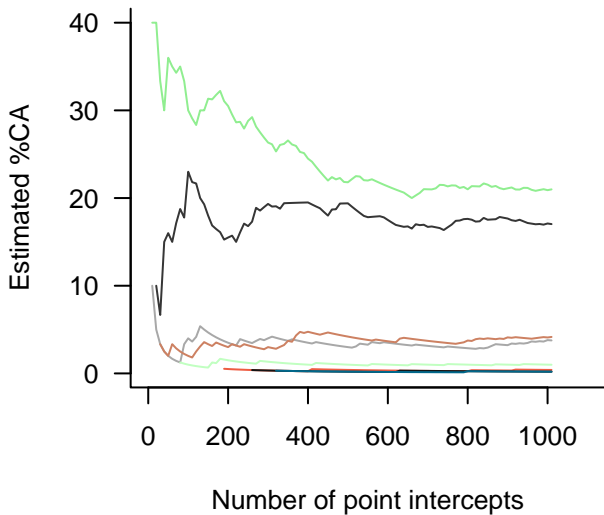

- Aristida contorta
- Enneapogon polyphyllus
- Fimbristylis dichotoma
- Sclerolaena diacantha
- Sclerolaena lanicuspis

### NTAFIN0013-53633

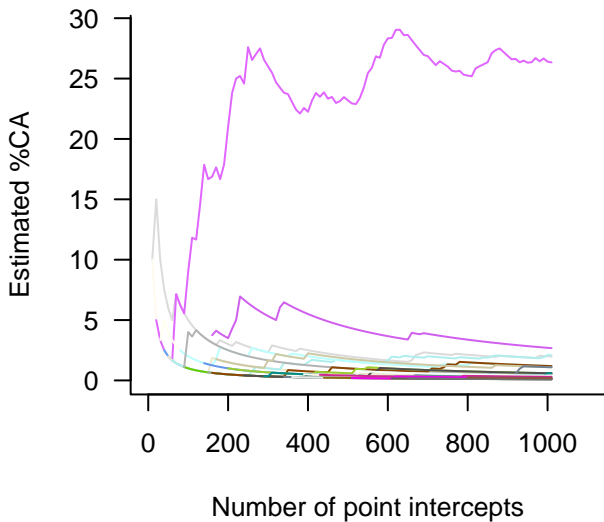

- Eucalyptus coolabah
- Acacia tetragonophylla
- Senna artemisioides subsp. alici
- Cenchrus ciliaris
- Senna artemisioides subsp. filifo

### NTAFIN0014-53634

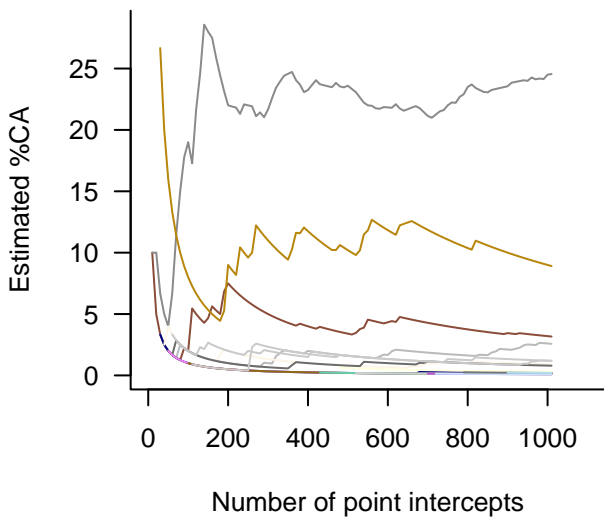

- Triodia basedowii
- Acacia estrophiolata
- Eragrostis eriopoda subsp. sand
- Aristida holathera
- Eriachne aristidea

### NTAFIN0015-53635

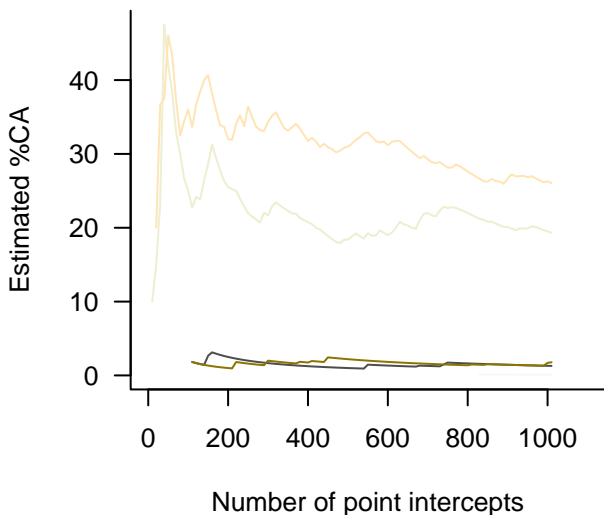

- Eucalyptus camaldulensis* subsp.
- Cynodon dactylon*
- Cenchrus ciliaris*
- Melaleuca glomerata*
- Zygochloa paradoxa*

### NTAFIN0016-53636

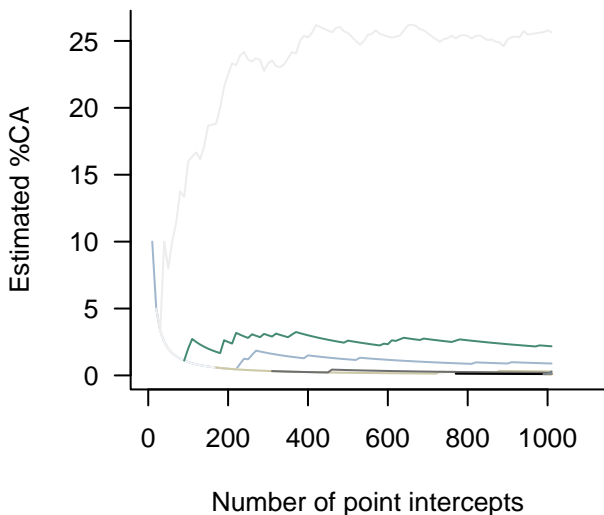

- Enneapogon avenaceus*
- Maireana astrotricha*
- Sclerolaena lanicuspis*
- Eragrostis setifolia*
- Sida fibulifera*

### NTAFIN0017-53637

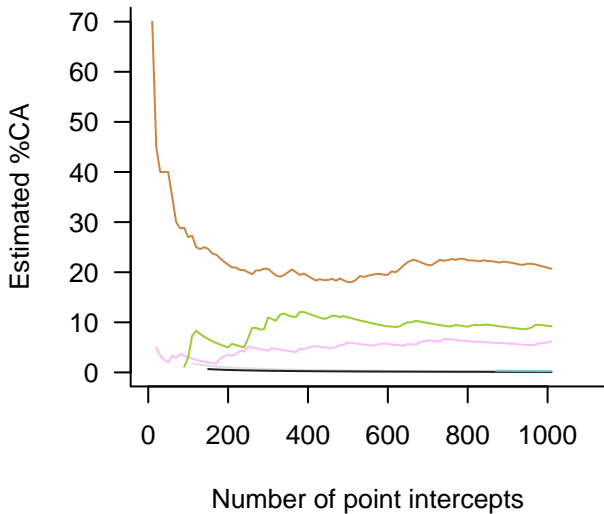

- Cynodon dactylon*
- Eucalyptus camaldulensis* subsp. *camaldulensis*
- Cenchrus ciliaris*
- Crotalaria eremaea* subsp. *streh*
- Zygochloa paradoxa*

### NTAFIN0018-53638

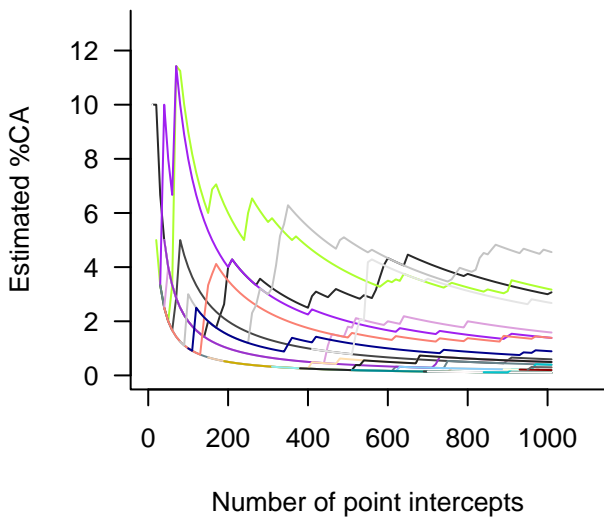

- Senna artemisioides* subsp. *alici*
- Eremophila freelingii*
- Enneapogon avenaceus*
- Enneapogon cylindricus*
- Acacia tetragonophylla*

### NTAFIN0019-53639

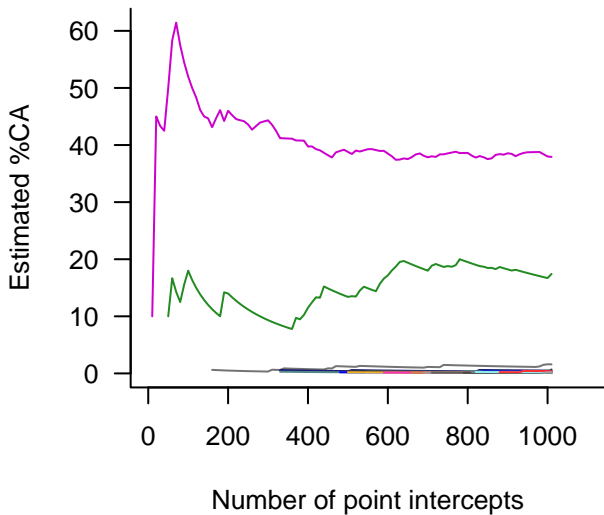

### NTAFIN0020-53640

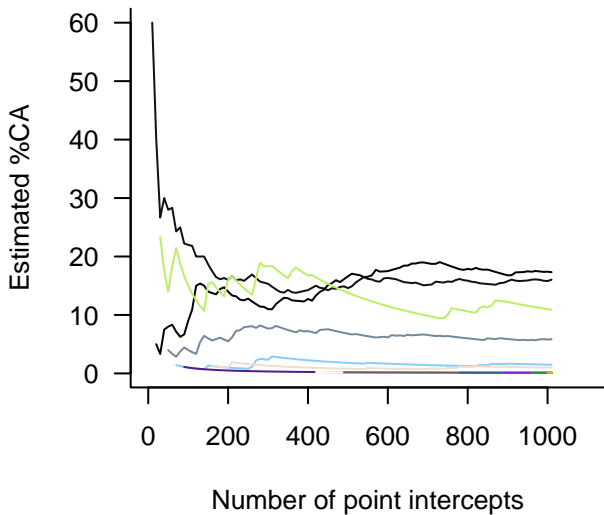



### NTAFIN0021-53641

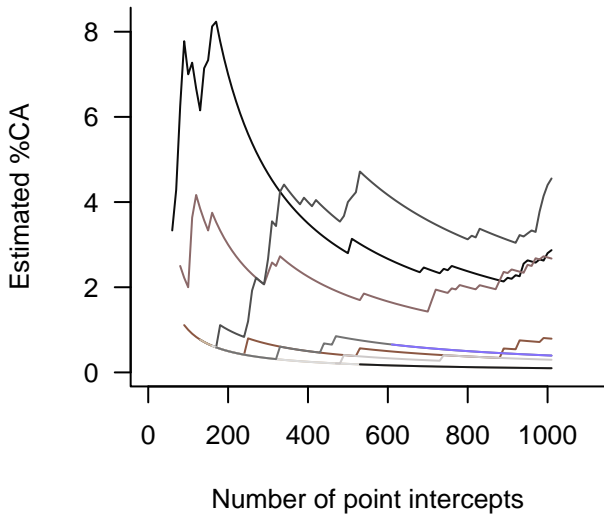

### NTAFIN0022-53642

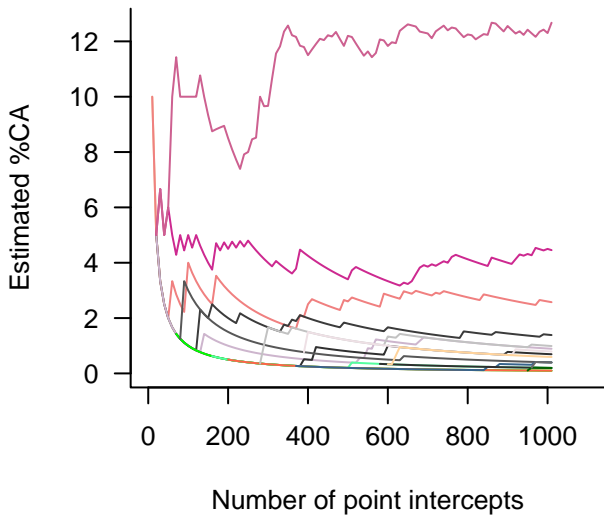

### NTAFIN0023-53643

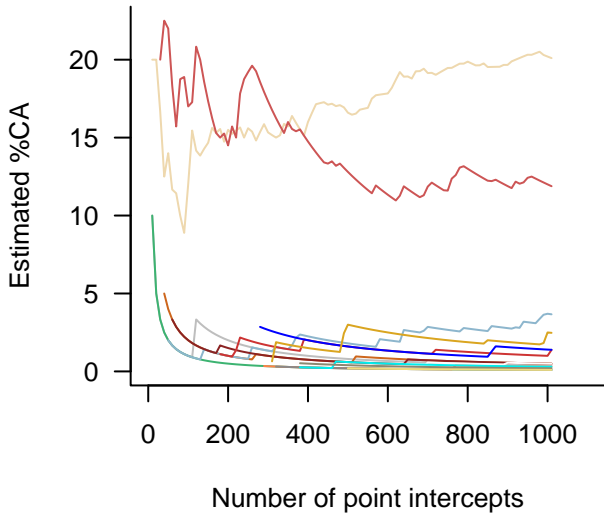

- Triodia basedowii
- Eucalyptus gamophylla
- Eragrostis eriopoda subsp. sand
- Hakea leucoptera
- Templetonia egena

### NTAFIN0024-53644

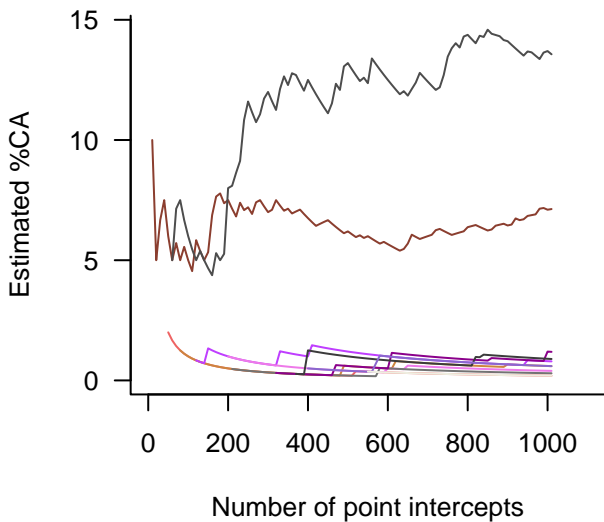

- Eucalyptus coolabah
- Maireana scleroptera
- Cynodon dactylon
- Sclerolaena patenticuspis
- Cenchrus ciliaris

### NTAFIN0025-53645

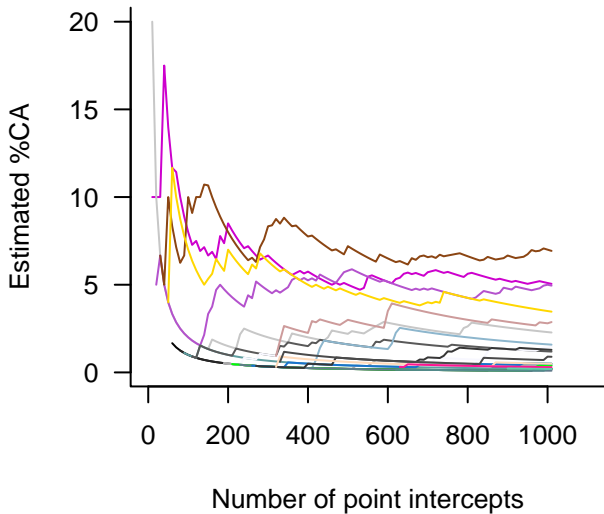

- Aristida contorta*
- Eremophila freelingii*
- Enneapogon avenaceus*
- Aristida holathera*
- Acacia aptaneura*

### NTAFIN0026-53646

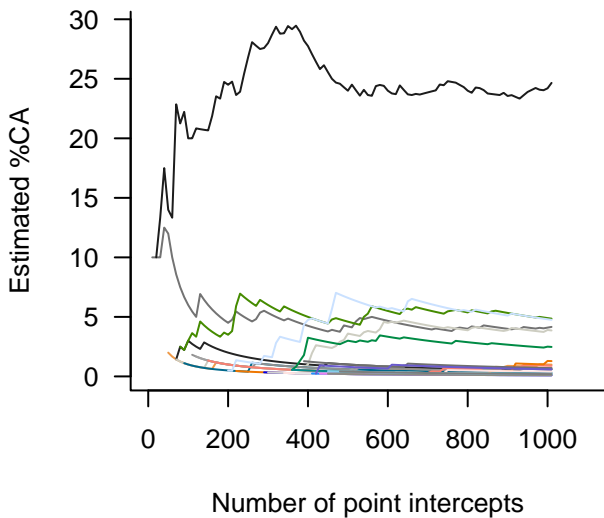

- Enneapogon avenaceus*
- Acacia aptaneura*
- Cenchrus ciliaris*
- Sida fibulifera*
- Acacia aneura*

### NTAFIN0027-53647

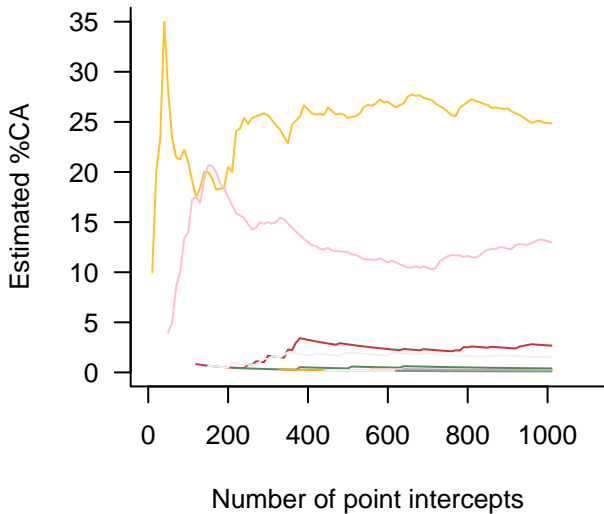

- Enneapogon avenaceus
- Enneapogon cylindricus
- Eragrostis eriopoda subsp. red e
- Sida sp. limestone (d.e.albrecht)
- Triraphis mollis

### NTAFIN0028-53746

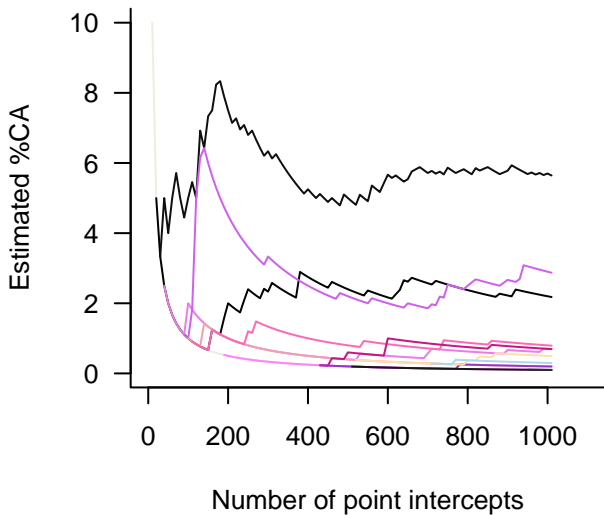

- Atriplex vesicaria
- Enneapogon avenaceus
- Tripogon loliiformis
- Sclerolaena cuneata
- Sclerolaena decurrens

### NTAFIN0029-53747

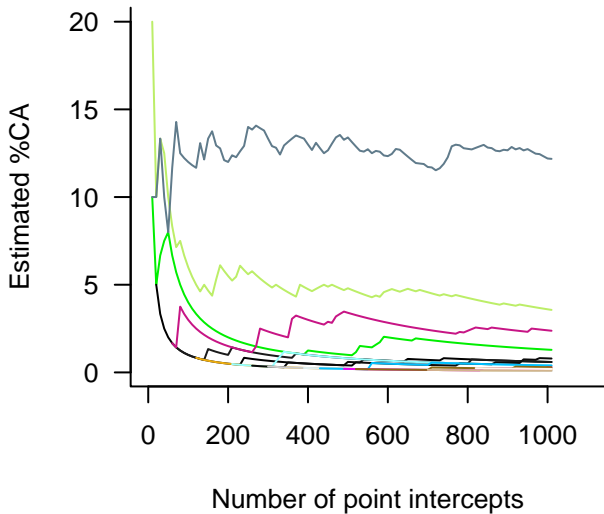

### NTAFIN0030-53748

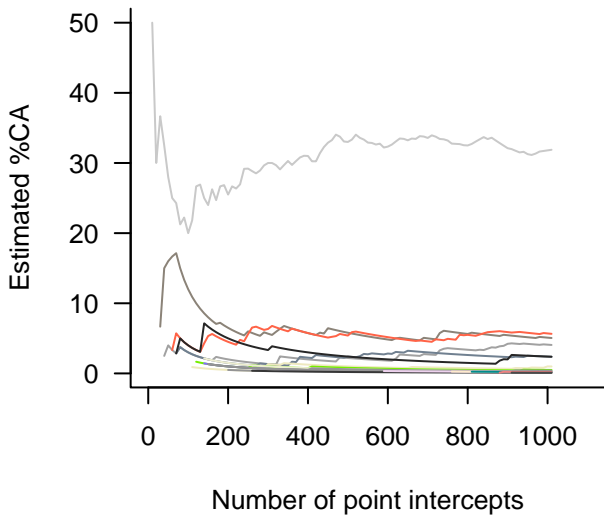

### NTAFIN0031-53749

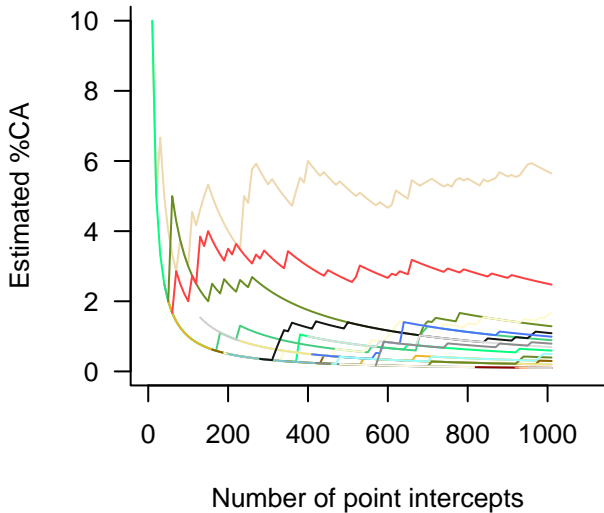

- Eremophila freelingii*
- Sclerolaena diacantha*
- Tripogon loliiformis*
- Aristida contorta*
- Sida fibulifera*

### NTAFIN0032-53750

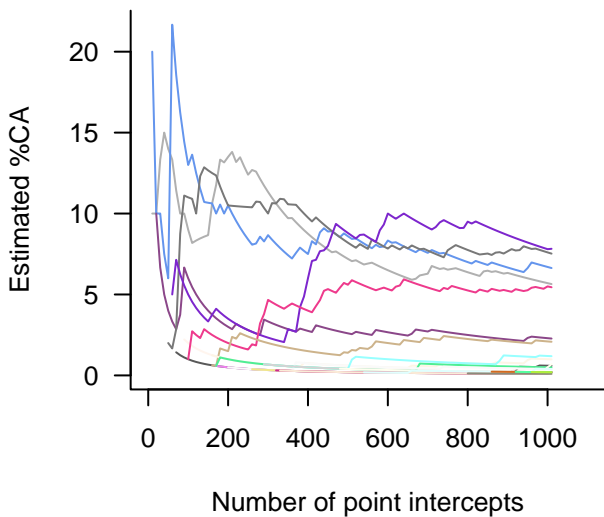

- Acacia aneura*
- Eragrostis eriopoda* subsp. red e
- Digitaria brownii*
- Triodia pungens*
- Acacia paraneura*

### NTAFIN0033-53751

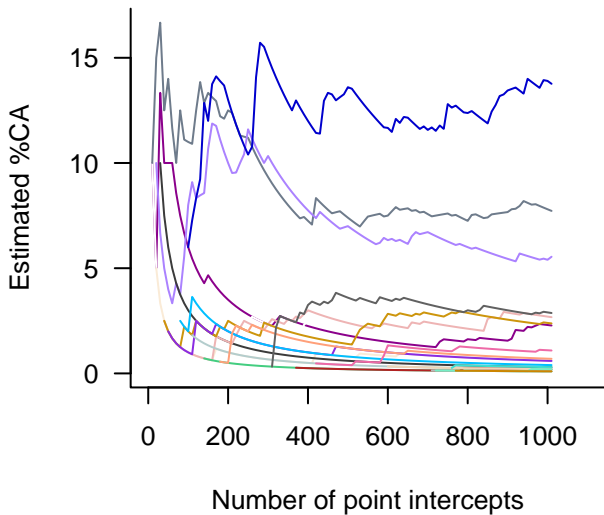

- Cenchrus ciliaris*
- Acacia estrophiolata*
- Aristida holathera*
- Enneapogon avenaceus*
- Triodia pungens*

### NTAGFU0001-53648

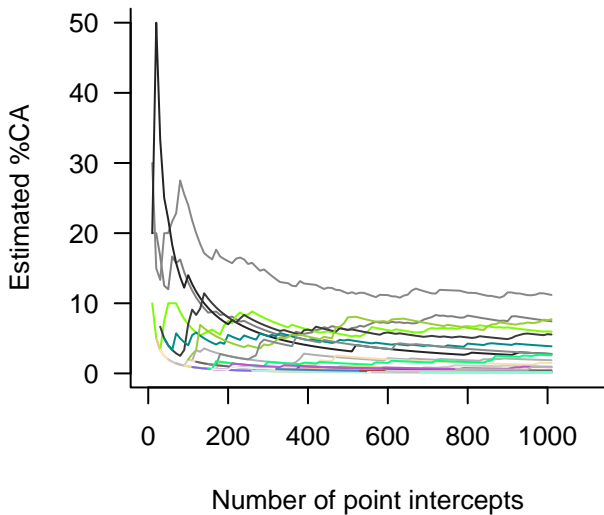

- Aristida pruinosa*
- Chrysopogon fallax*
- Enneapogon polyphyllus*
- Aristida inaequiglumis*
- Digitaria brownii*

### NTAGFU0002-53649

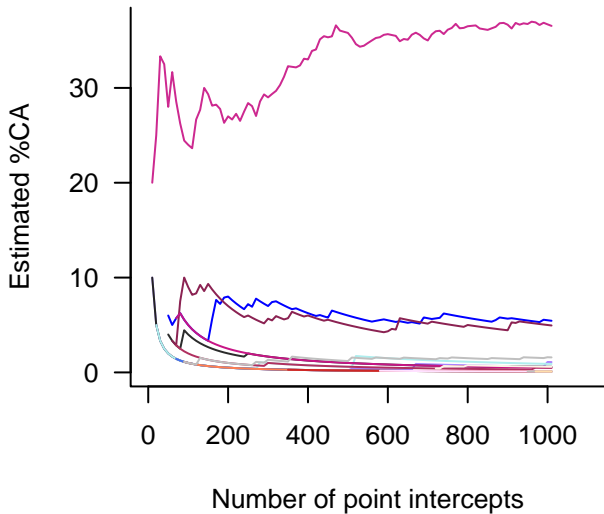

- Triodia pungens*
- Eucalyptus leucophloia*
- Enneapogon polyphyllus*
- Fimbristylis dichotoma*
- Acacia tenuissima*

### NTAGFU0003-53650

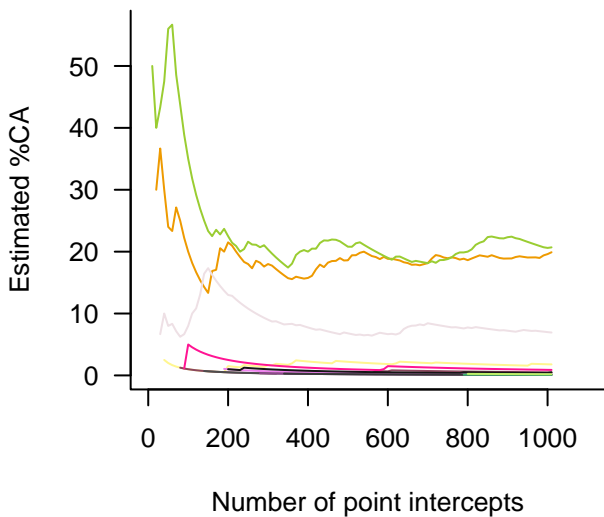

- Eulalia aurea*
- Eucalyptus leucophloia*
- Triodia pungens*
- Chrysopogon fallax*
- Yakirra australiensis* var. *interme*



### NTAGFU0004-53651

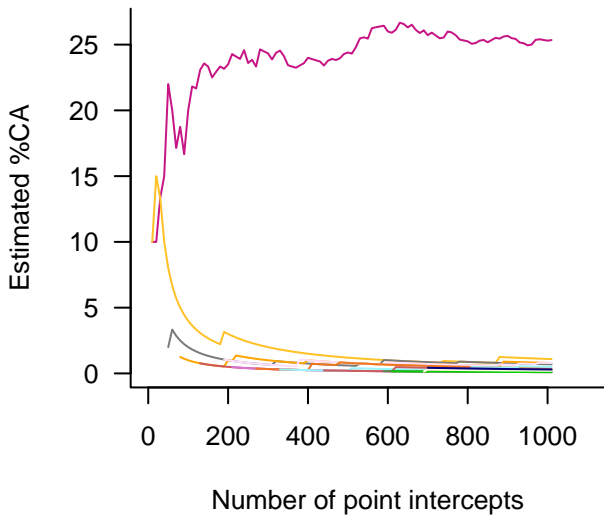

- *Triodia bitextura*
- *Terminalia canescens*
- *Acacia plectocarpa* subsp. *tanur*
- *Grevillea wickhamii*
- *Aristida holathera*

### NTAGFU0005-53652

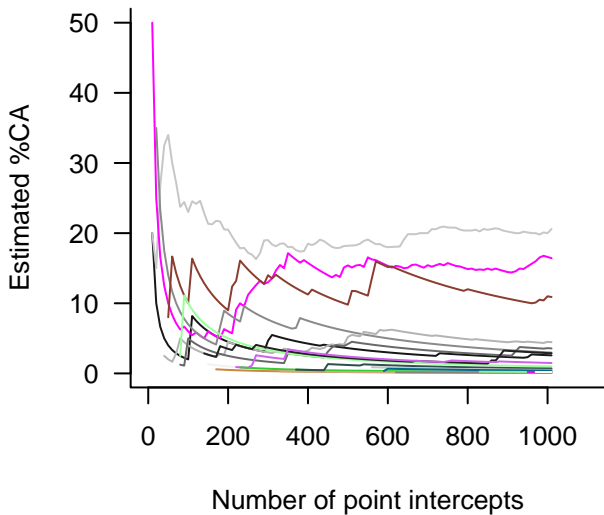

- *Triodia bitextura*
- *Acacia thomsonii*
- *Corymbia drysdalensis*
- *Schizachyrium fragile*
- *Corymbia polycarpa*

### NTAGFU0006-53653

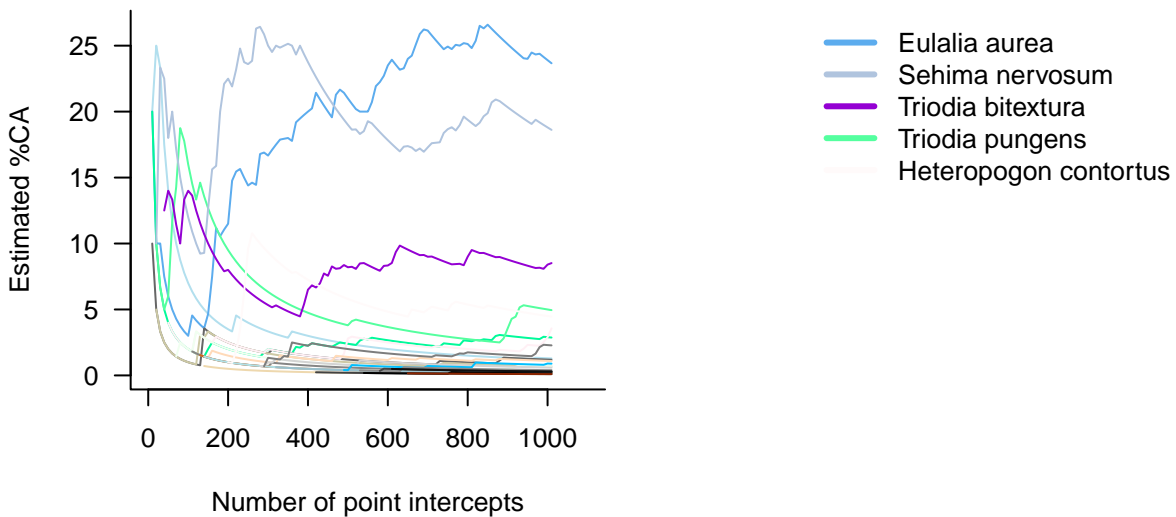

### NTAGFU0007-53654

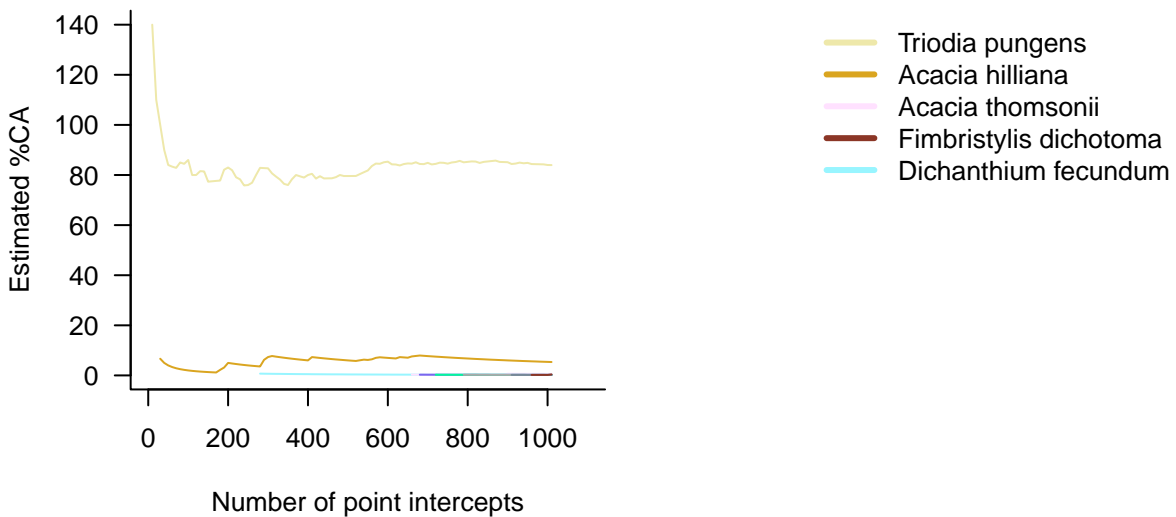

### NTAGFU0008-53655

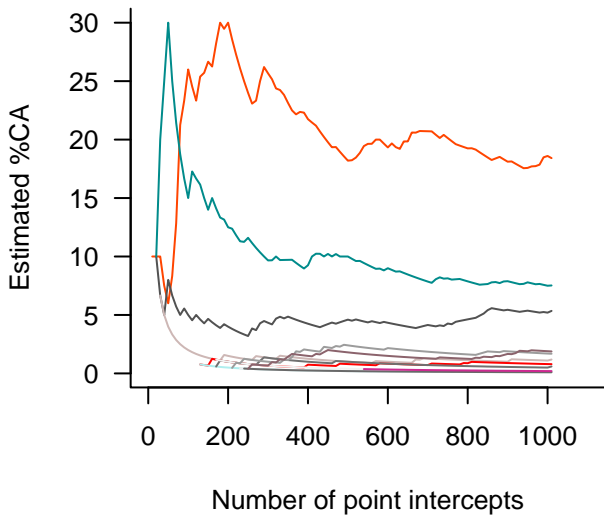

- Triodia pungens*
- Aristida contorta*
- Fimbristylis dichotoma*
- Trianthesa triquetra*
- Tripogon loliiformis*

### NTAGFU0009-53656

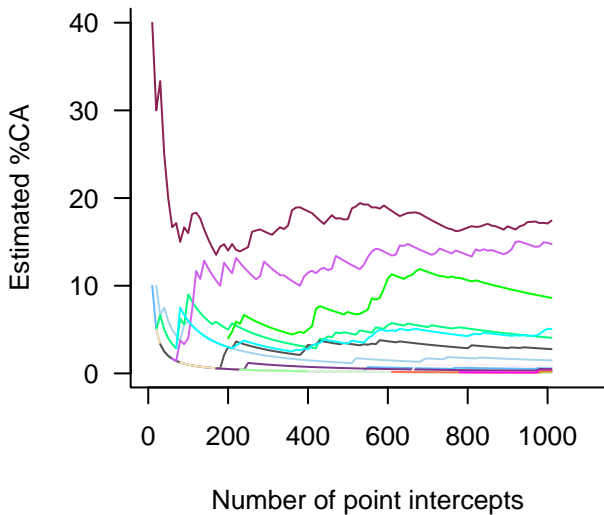

- Triodia pungens*
- Eucalyptus microtheca*
- Acacia lysiphloia*
- Chrysopogon fallax*
- Acacia thomsonii*

### NTAGFU0010-53657

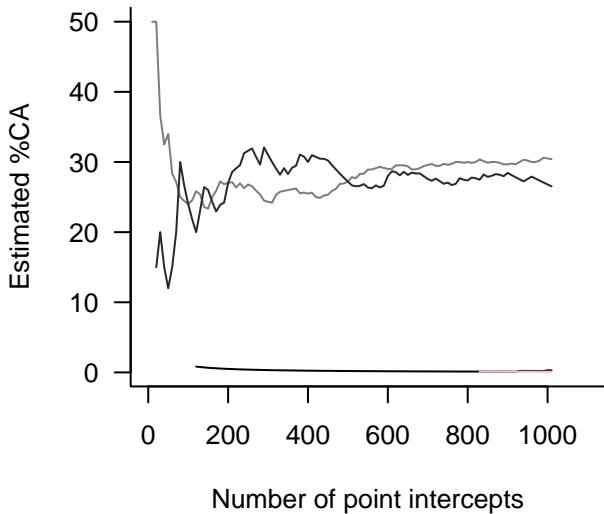

### NTAGFU0011-53658

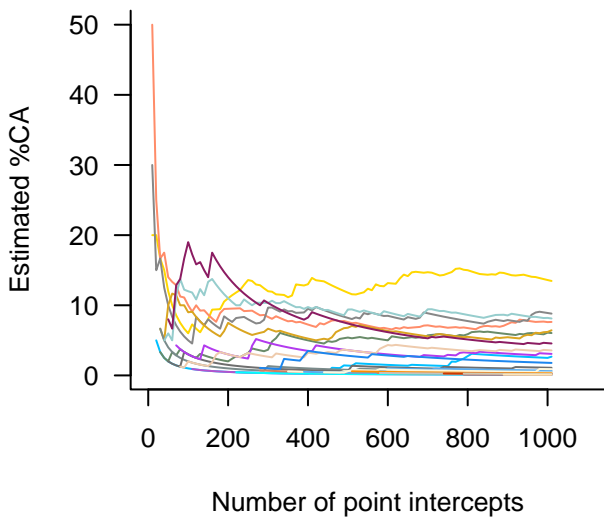

### NTAGFU0012-53659

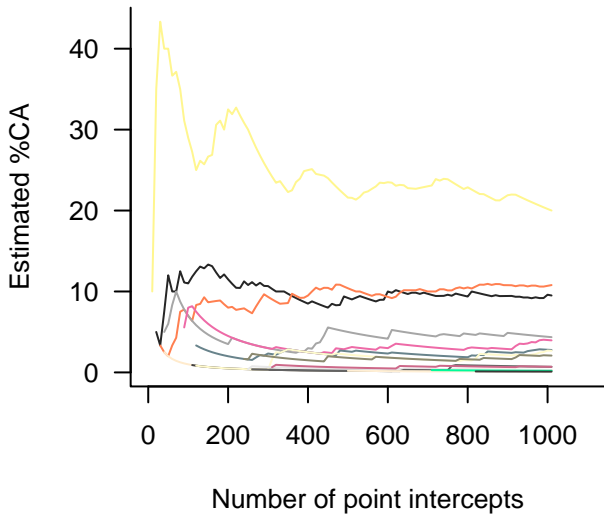

- Triodia bitextura
- Eucalyptus leucophloia
- Chrysopogon fallax
- Eulalia aurea
- Eriachne melicacea

### NTAGFU0013-53660

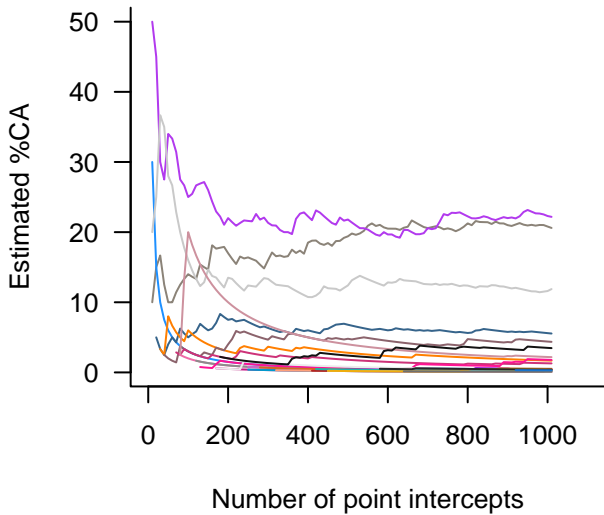

- Eulalia aurea
- Chrysopogon fallax
- Triodia bitextura
- Melaleuca stenostachya
- Acacia phlebocarpa

### NTAGFU0014-53661

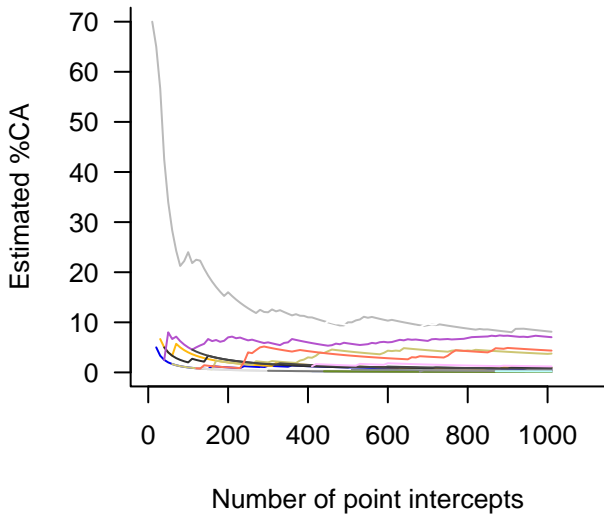

### NTAGFU0015-53662

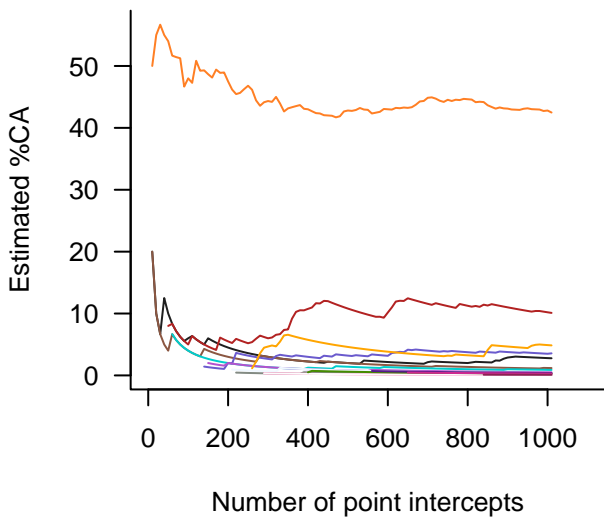

### NTAGFU0016-53663

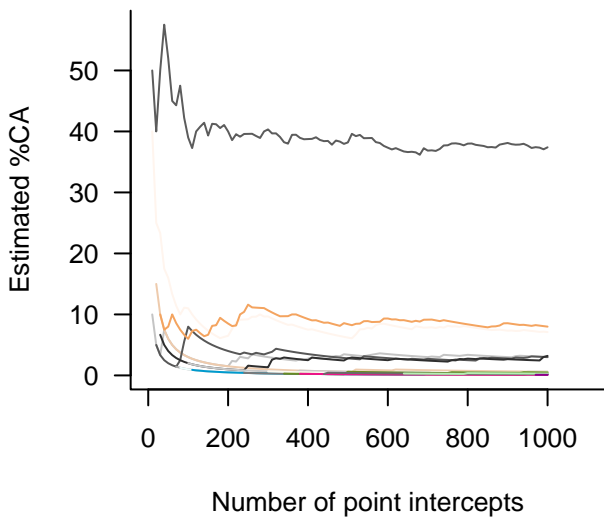

### NTAGFU0017-53664

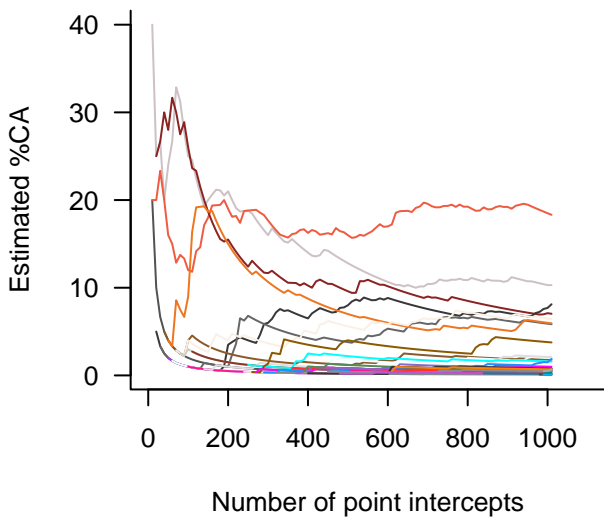

### NTAGFU0018-53665

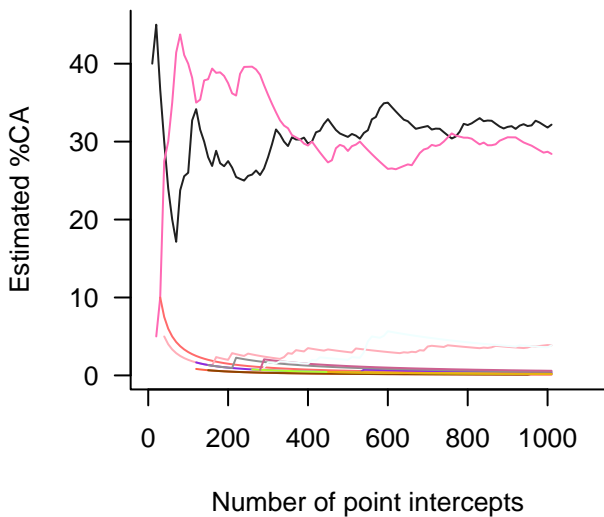

- *Acacia shirleyi*
- *Schizachyrium fragile*
- *Eriachne ciliata*
- *Paspalidium gracile* var. *gracile*
- *Fimbristylis dichotoma*

### NTAGFU0019-53666

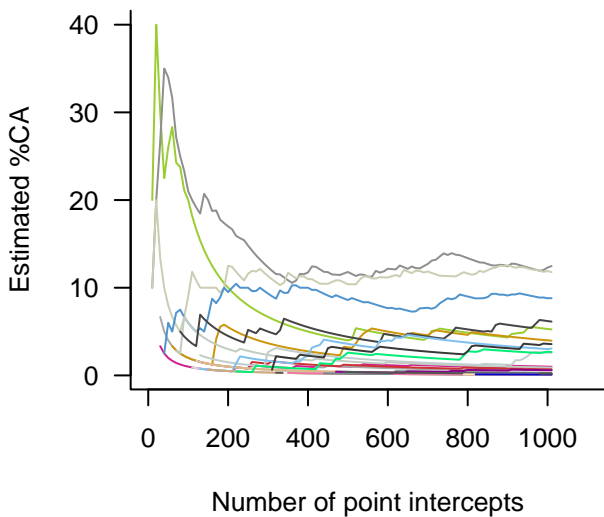

- *Schizachyrium fragile*
- *Eulalia aurea*
- *Triodia bitextura*
- *Corymbia drysdalensis*
- *Acacia calligera*



### NTAGFU0020-53667

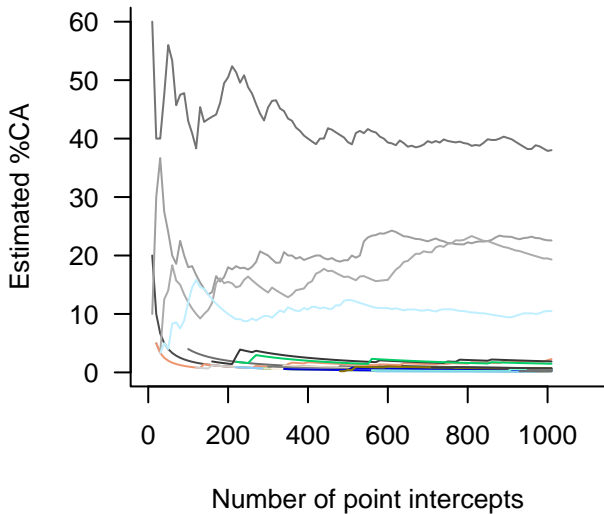

### NTAGFU0021-53668

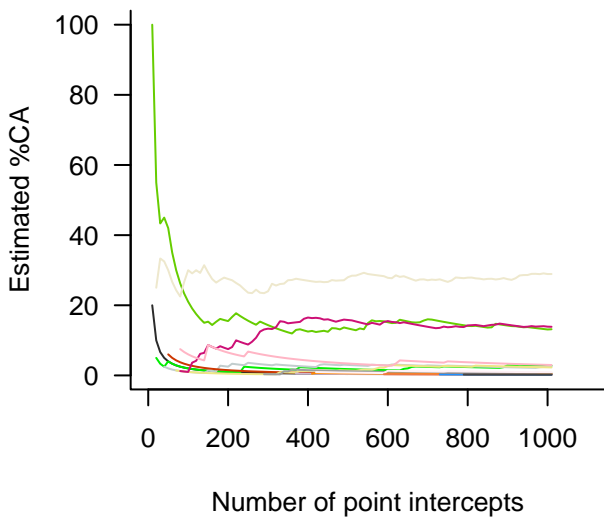

### NTAGFU0022-53669

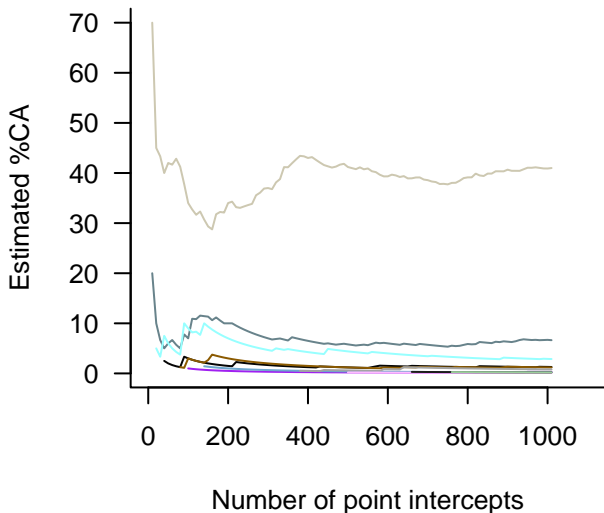

### NTAGFU0023-53670

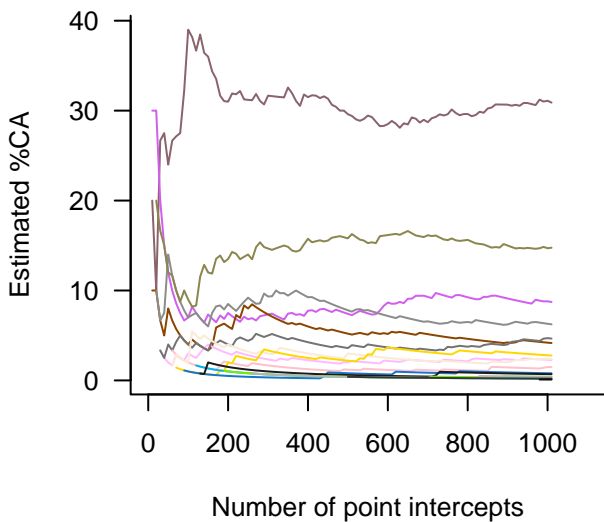

### NTAGFU0024-53671

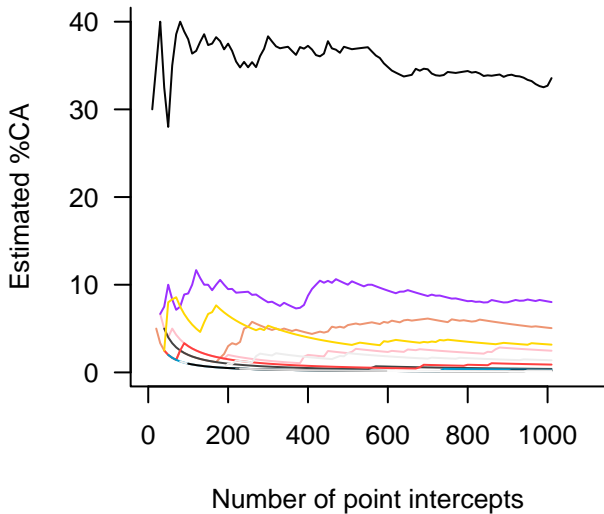

- *Triodia bitextura*
- *Schizachyrium fragile*
- *Acacia subternata*
- *Jacksonia aculeata*
- *Corymbia drysdalensis*

### NTAGFU0025-53672

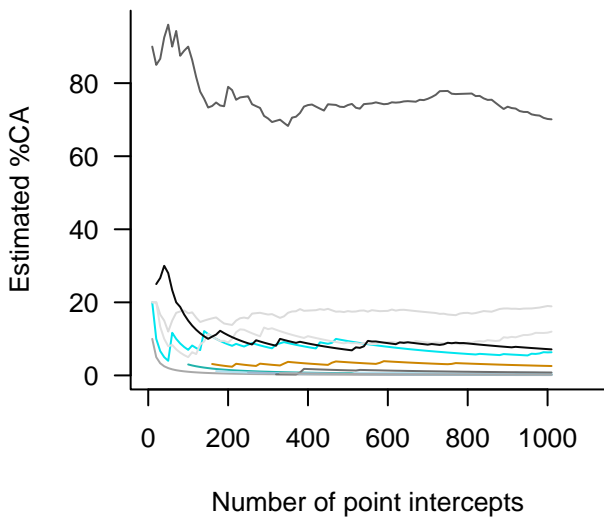

- *Eulalia aurea*
- *Melaleuca stenostachya*
- *Terminalia volucris*
- *Chrysopogon setifolius*
- *Aristida pruinosa*

### NTAGFU0026-53673

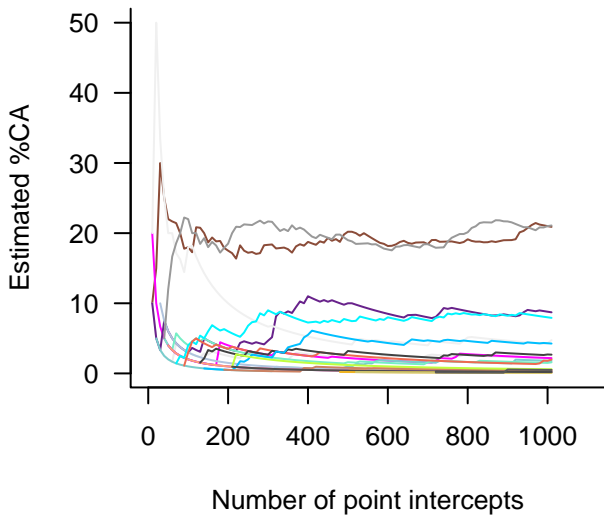

### NTAGFU0027-53674

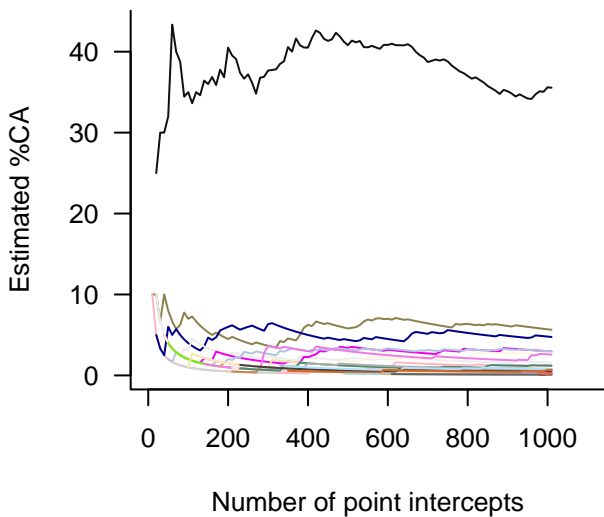

### NTAGFU0028-53675

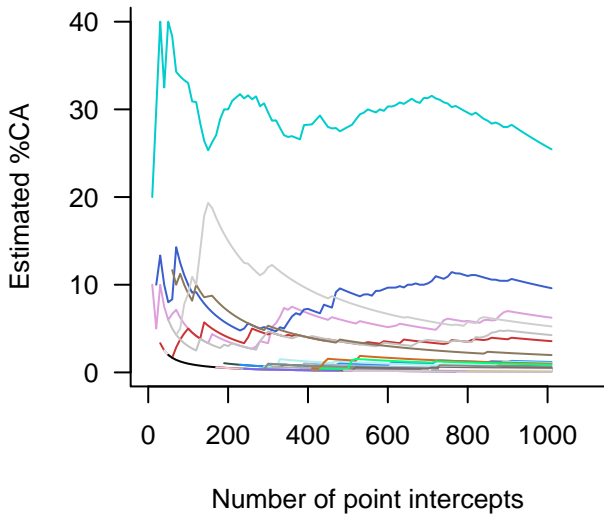

### NTAGFU0029-53676

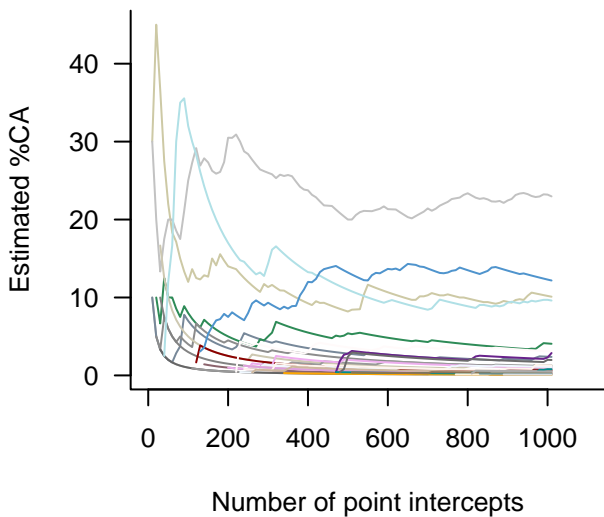

### NTAGFU0030-53677

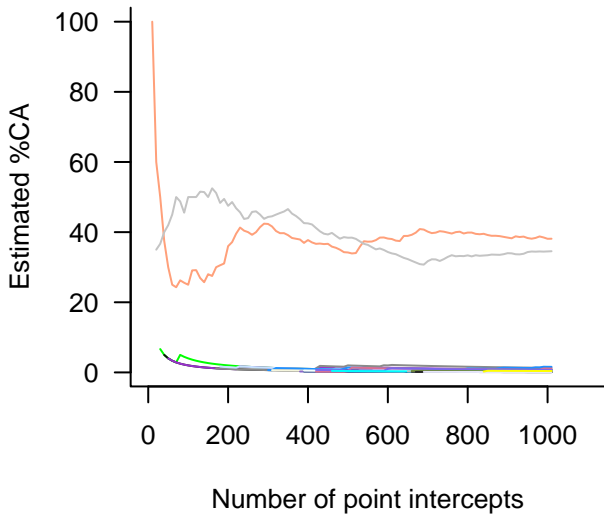

### NTAGFU0031-53678

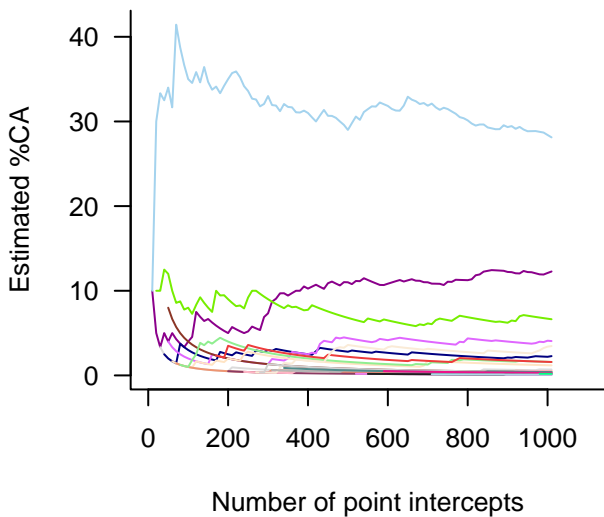

### NTAGFU0032-53679

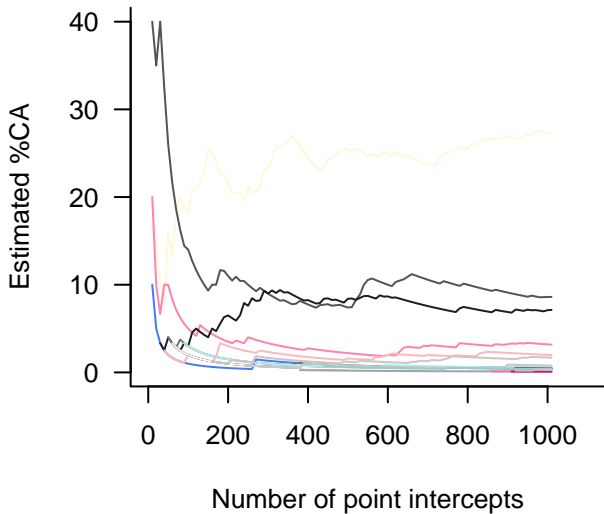

### NTAGFU0033-53680

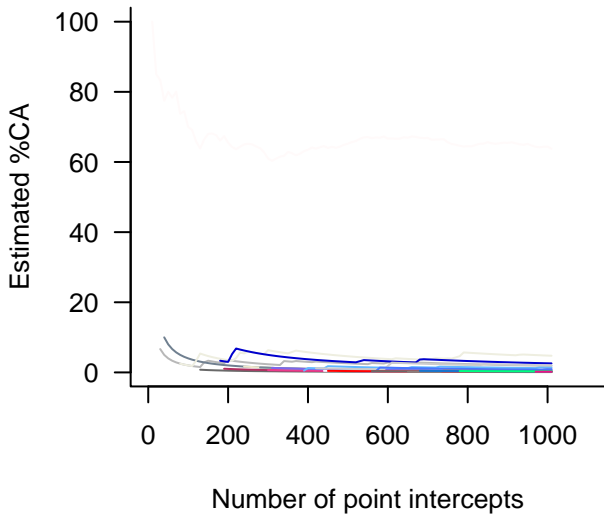

### NTAGFU0034-53681

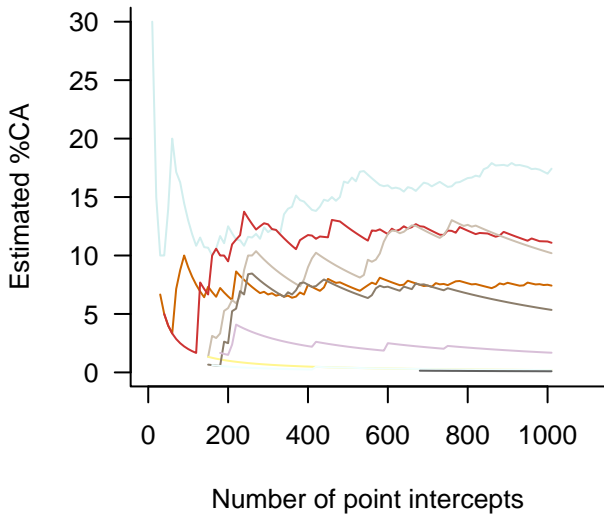

### NTAGFU0035-53682

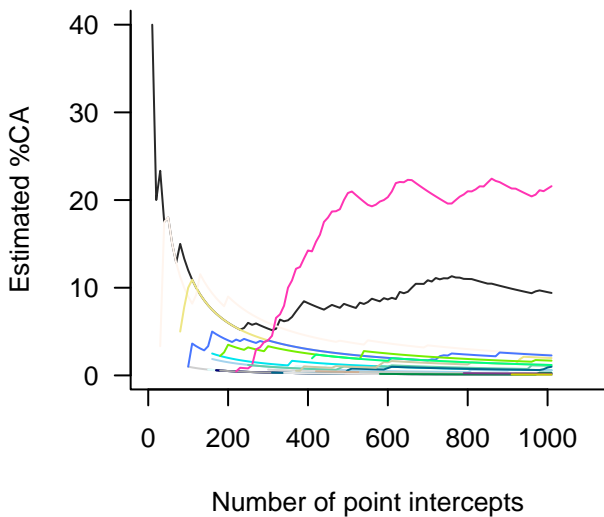



### NTAGFU0036-53683

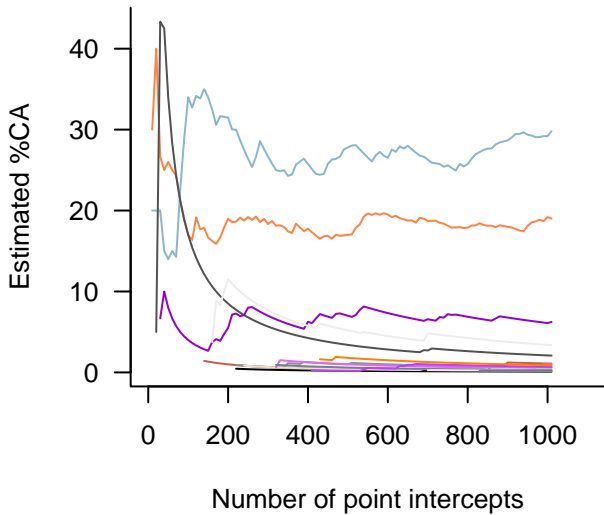

- Acacia shirleyi
- Schizachyrium fragile
- Eucalyptus leucophloia
- Aristida perniciososa
- Chrysopogon fallax

### NTAGFU0037-53684

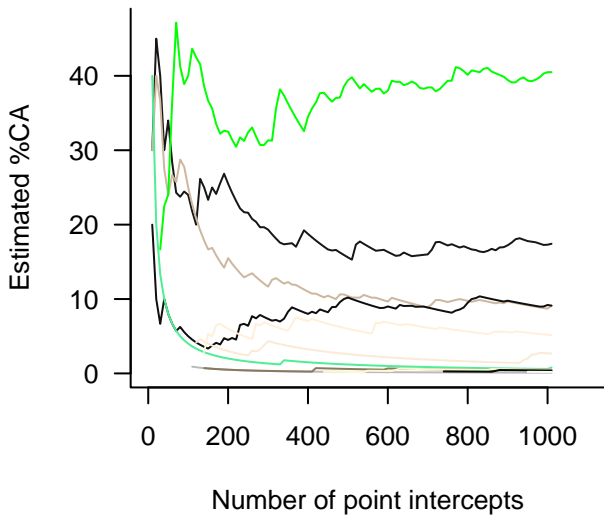

- Enteropogon minutus*
- Chrysopogon fallax*
- Eucalyptus microtheca*
- Excoecaria parvifolia*
- Eriachne glauca var. barbinodis*

### NTAGFU0038-53685

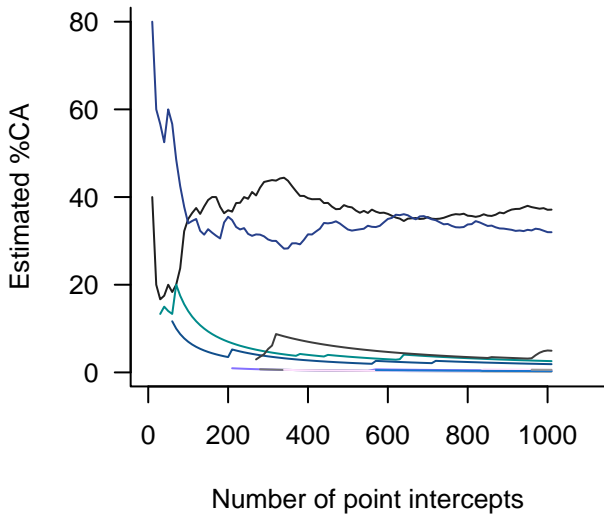

- Acacia shirleyi
- Schizachyrium fragile
- Eucalyptus leucophloia
- Terminalia canescens
- Dolichandrone heterophylla

### NTAGFU0039-53686

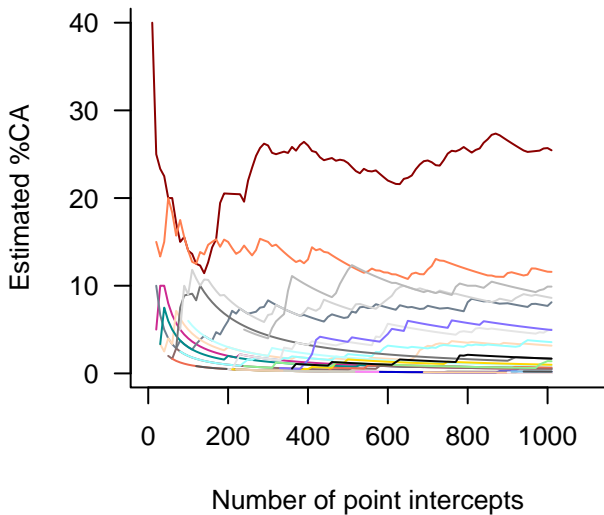

- Sorghum plumosum
- Schizachyrium fragile
- Heteropogon contortus
- Chrysopogon fallax
- Aristida holathera

### NTAGFU0040-53687

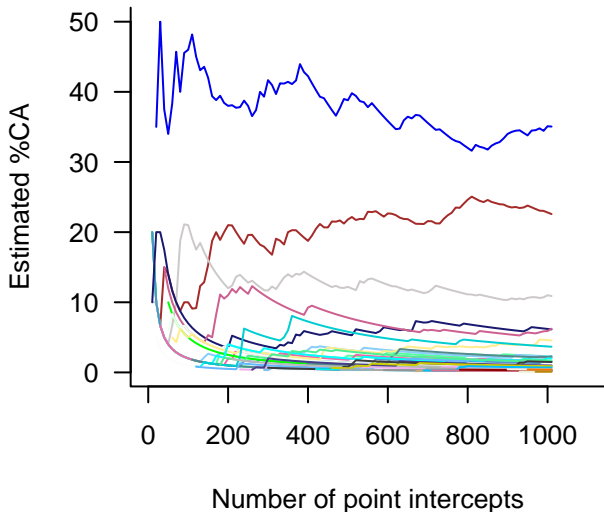

- Heteropogon contortus*
- Acacia dimidiata*
- Sorghum sp.*
- Dichanthium fecundum*
- Petalostigma banksii*

### NTAMAC0001-53574

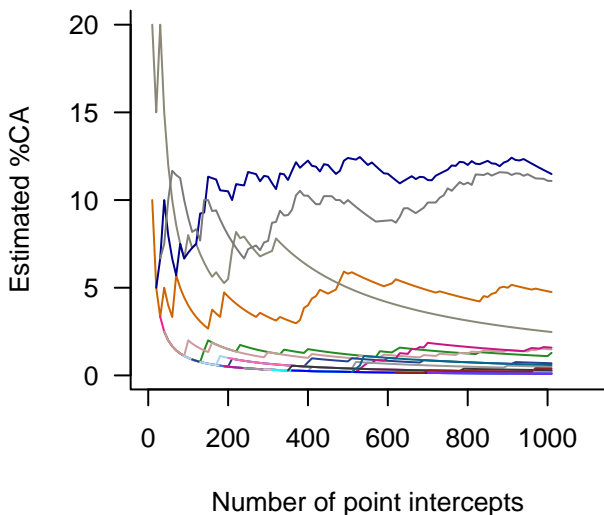

- Eragrostis eriopoda* subsp. sand
- Calandrinia balonensis*
- Acacia estrophiolata*
- Aristida holathera* var. *holathera*
- Enneapogon polyphyllus*

### NTAMAC0002-53575

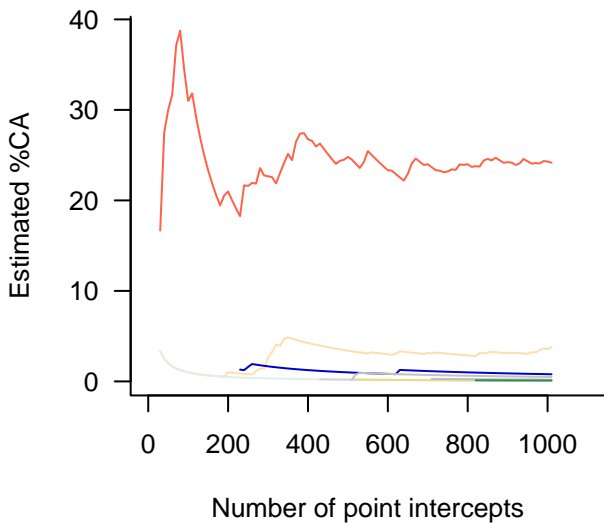

- Eucalyptus camaldulensis* subsp.
- Cynodon dactylon*
- Melaleuca trichostachya*
- Aristida holathera*
- Eulalia aurea*

### NTAMAC0003-53576

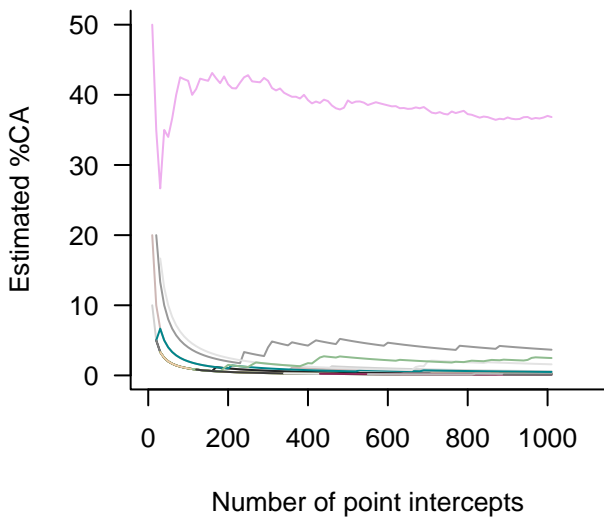

- Cenchrus ciliaris*
- Acacia victoriae* subsp. *arida*
- Calotis hispidula*
- Acacia murrayana*
- Polycalymma stuartii*

### NTAMGD0001-53520

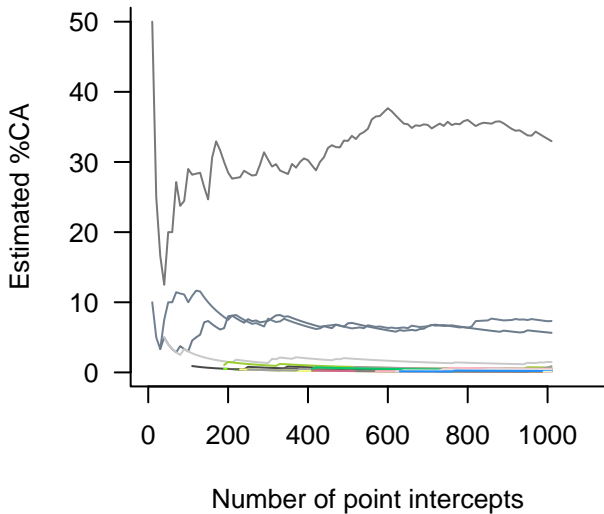

- *Acacia georginae*
- *Dactyloctenium radulans*
- *Portulaca sp. smooth seed (c.r.n)*
- *Cleome viscosa*
- *Portulaca sp. clay soil (s.t.blake)*

### NTAMGD0002-53466

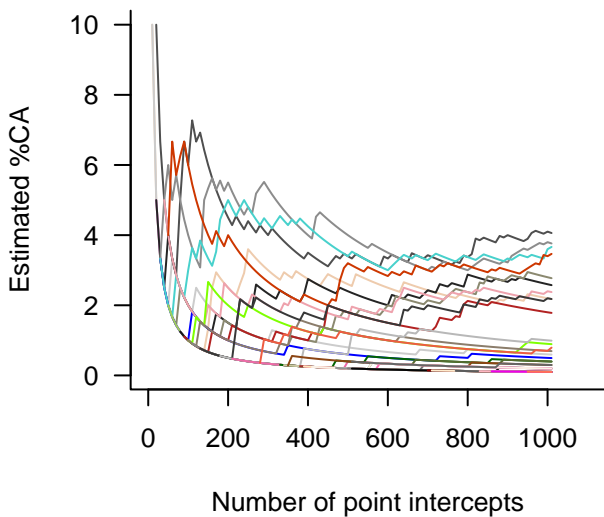

- *Dactyloctenium radulans*
- *Sida fibulifera*
- *Sorghum timorense*
- *Astrebla squarrosa*
- *Neptunia monosperma*

### NTASSD0001-53690

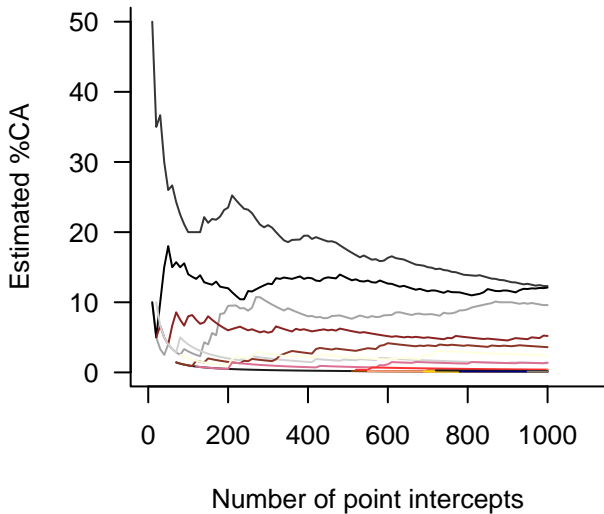

- *Triodia basedowii*
- *Dicrastylis costelloi*
- *Aristida holathera*
- *Eragrostis eriopoda* subsp. sand
- *Scaevola depauperata*

### NTASSD0003-53691

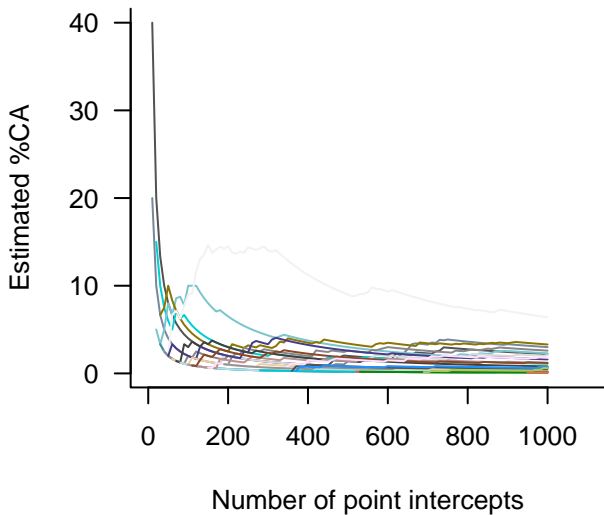

- *Dicrastylis costelloi*
- *Eremophila macdonnellii*
- *Zygochloa paradoxa*
- *Newcastelia spodiotricha*
- *Monachather paradoxus*

### NTASSD0004-53692

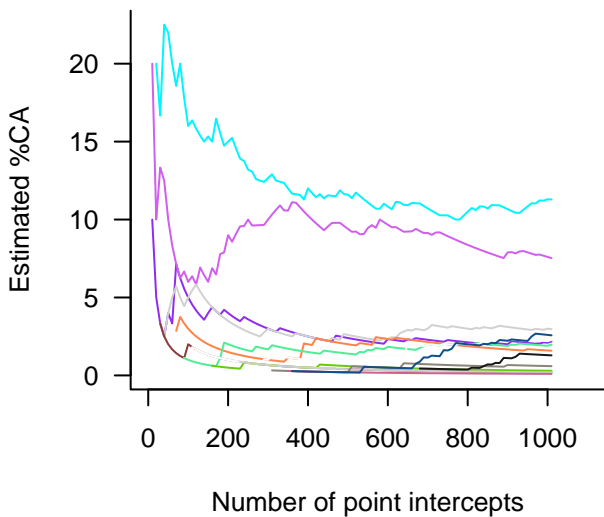

- Eremophila macdonnellii*
- Scaevola parvibarbata*
- Aristida holathera*
- Eragrostis eriopoda* subsp. red e
- Scaevola depauperata*

### NTASSD0005-53693

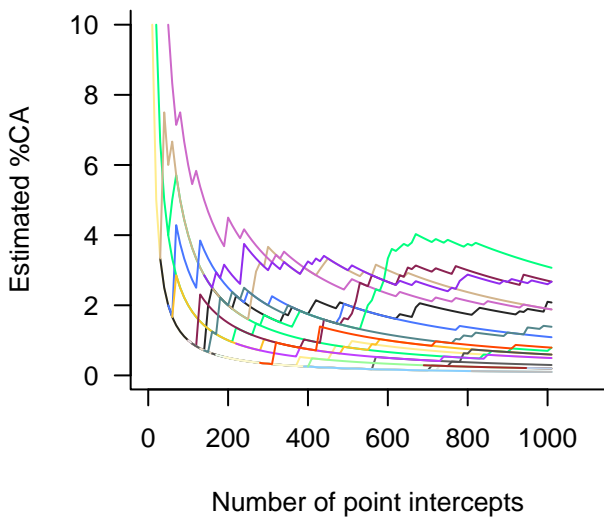

- Zygochloa paradoxa*
- Acacia murrayana*
- Aristida holathera*
- Sida ammophila*
- Corynotheca micrantha* var. diva

### NTASSD0006-53694

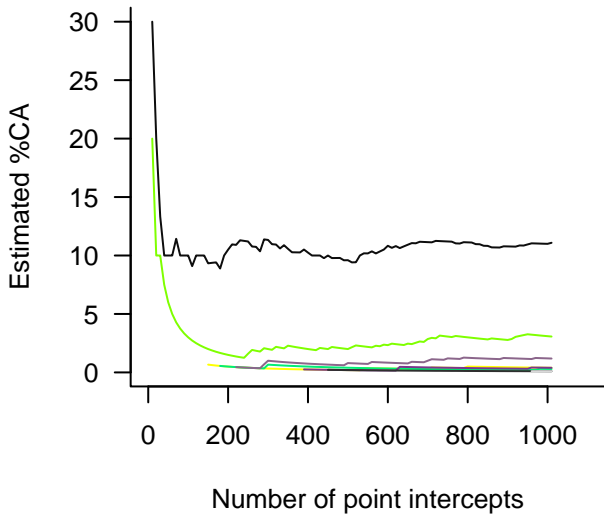

### NTASSD0007-53695

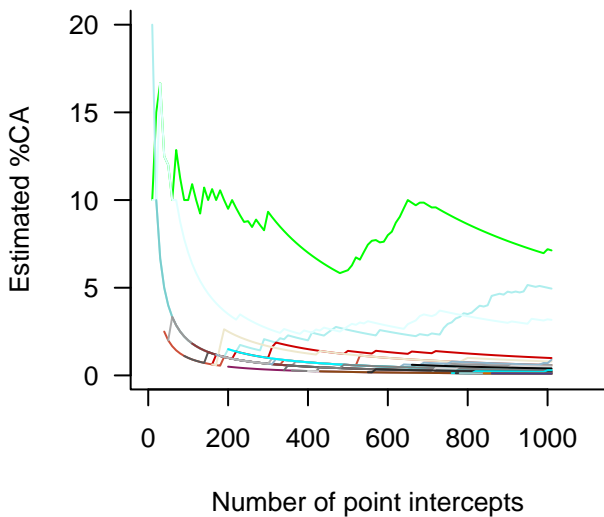



### NTASSD0009-53696

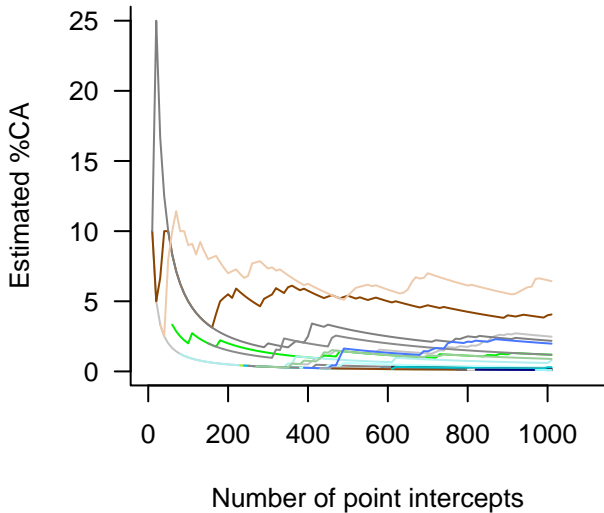

### NTASSD0010-53697

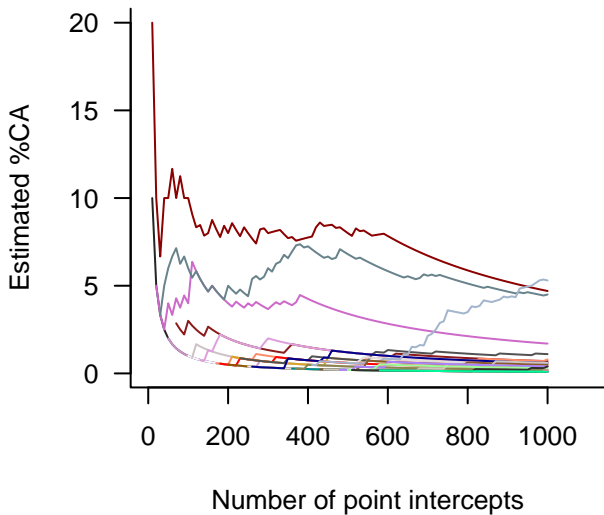

### NTASSD0011-53559

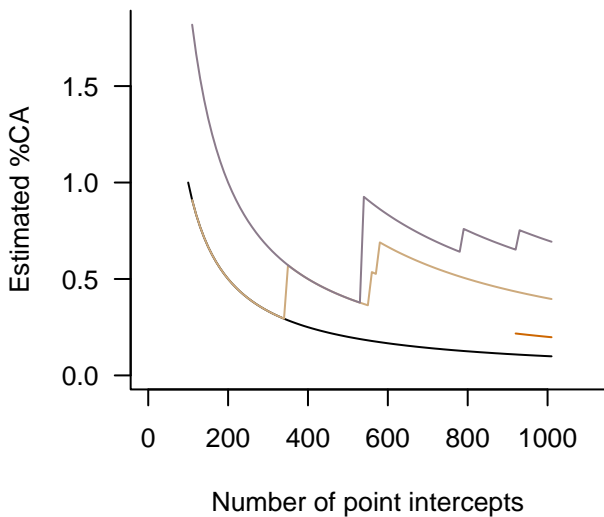

- Eragrostis setifolia*
- Sporobolus actinocladus*
- Tecticornia tenuis*
- Gnephosis arachnoidea*

### NTASSD0012-53560

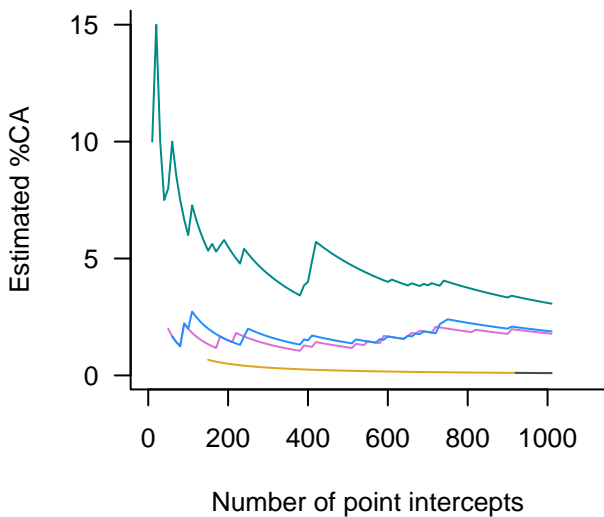

- No id
- Eragrostis setifolia*
- Sporobolus actinocladus*
- Maireana coronata*
- Astrebla pectinata*

### NTASSD0013-53563

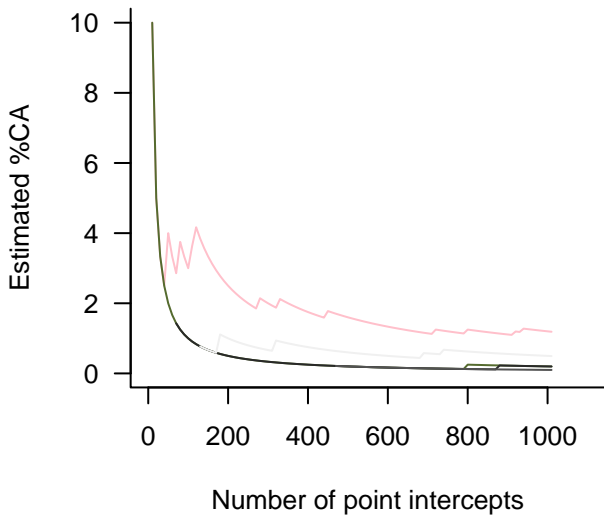

### NTASSD0014-53564

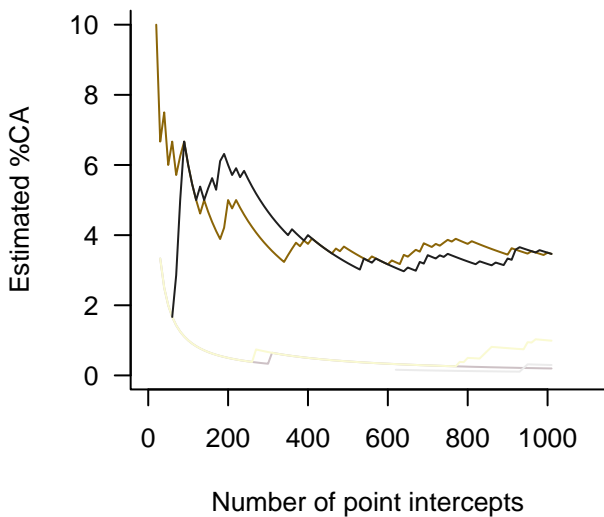

### NTASSD0015-53565

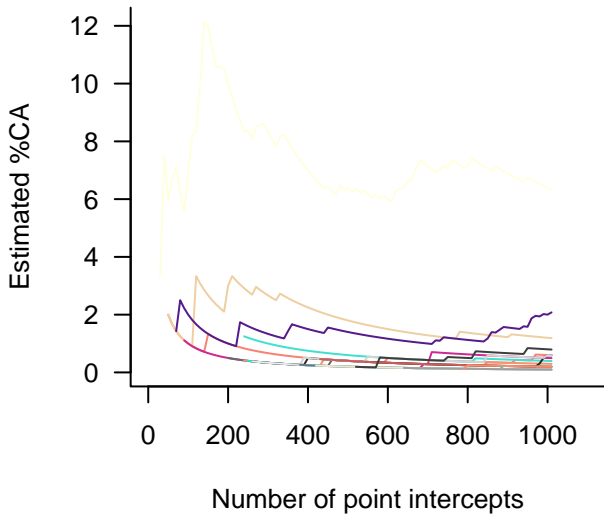

- Eremophila macdonnellii*
- Pluchea dunlopia*
- Eucalyptus coolabah*
- Acacia tetragonophylla*
- Senna artemisioides* subsp. *filifo*

### NTASSD0016-53566

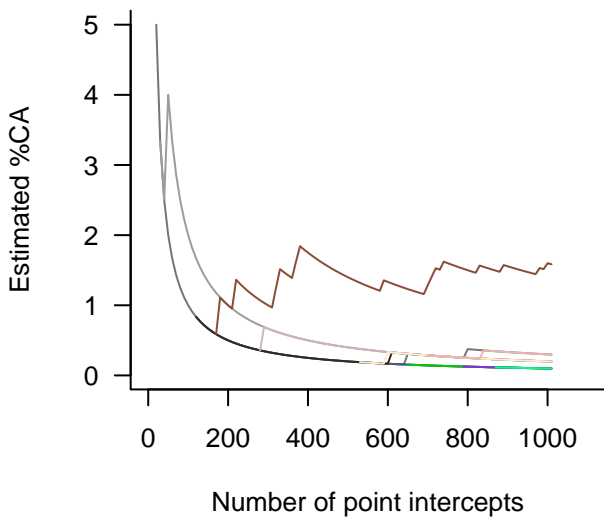

- Sida fibulifera*
- Tripogon loliiformis*
- Frankenia serpyllifolia*
- Hibiscus brachysiphonius*
- Dactyloctenium radulans*

### NTASSD0017-53561

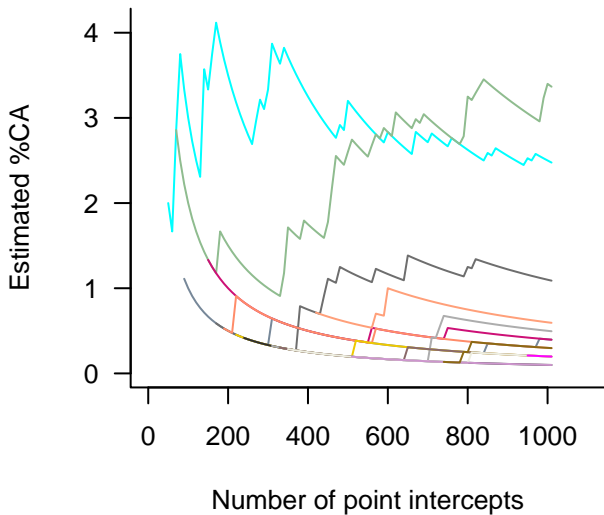

- Eremophila freelingii*
- Sclerolaena cuneata*
- Senna artemisioides* subsp. *alici*
- Acacia tetragonophylla*
- Enneapogon avenaceus*

### NTASSD0018-53562

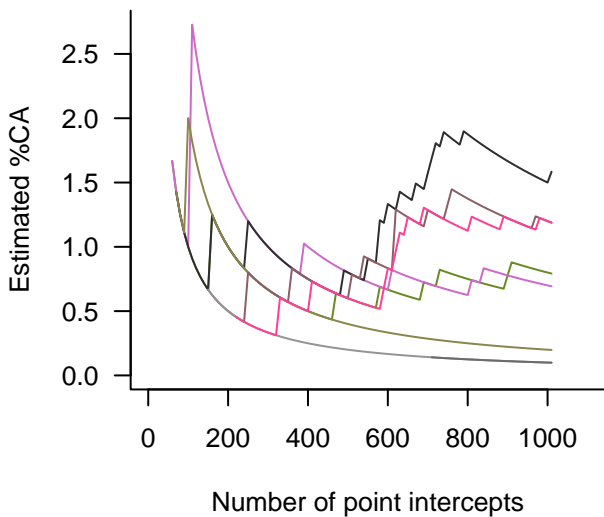

- Sporobolus actinocladus*
- Sclerolaena cuneata*
- Tecticornia tenuis*
- Sida fibulifera*
- Eragrostis setifolia*

### NTASSD0019-53567

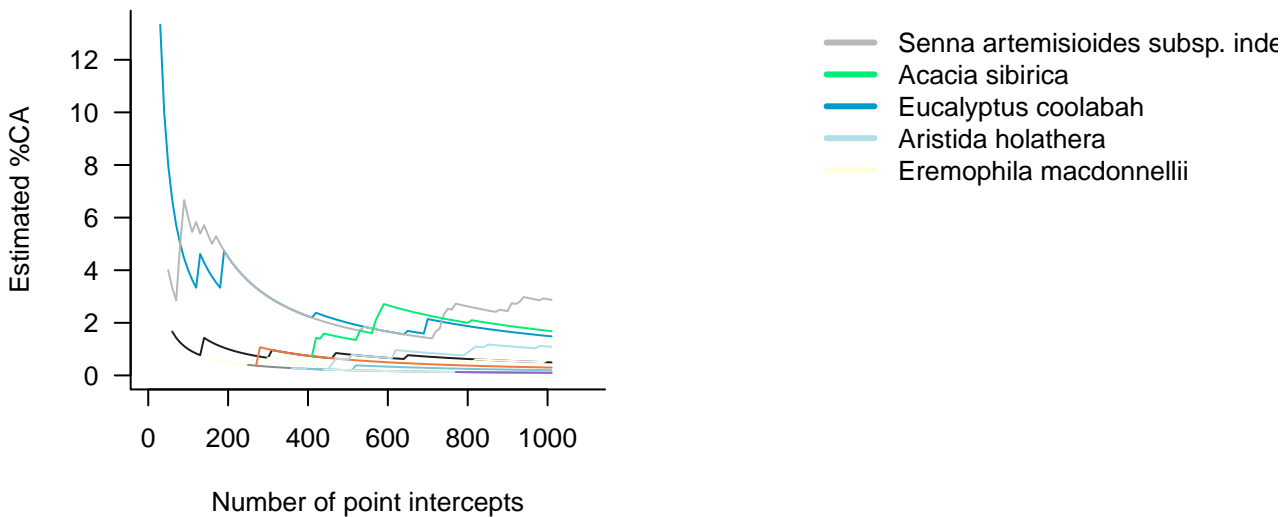

### NTTDAB0001-53580

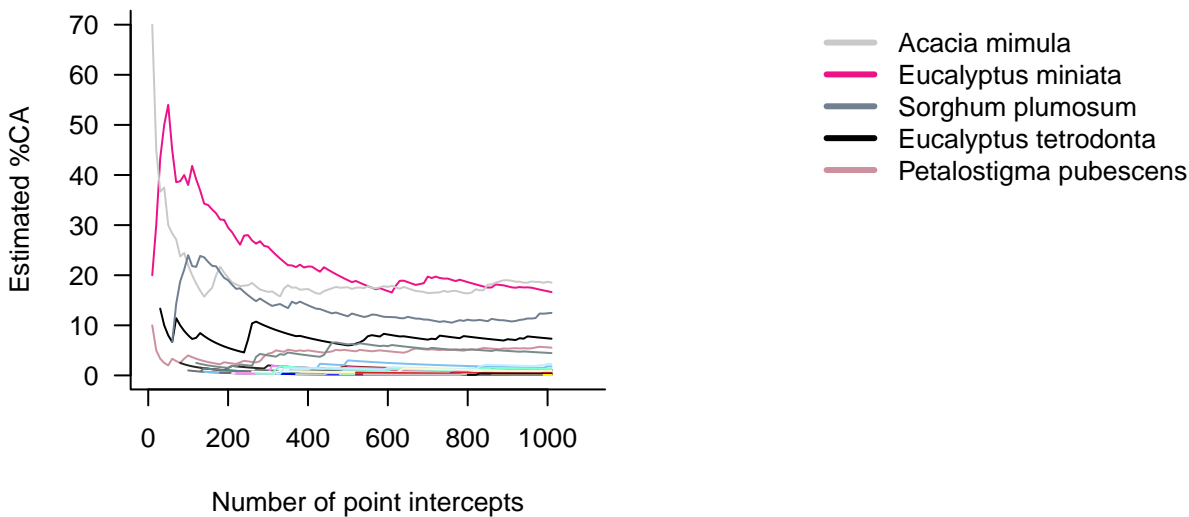

### NTTDAC0001-53755

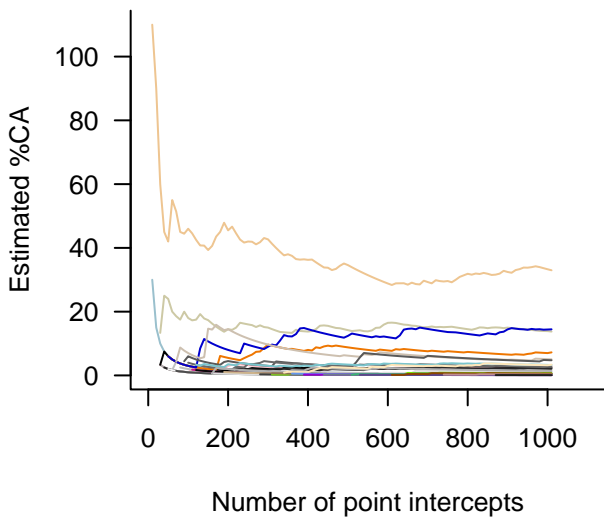

- Eucalyptus tetradonta*
- Erythrophleum chlorostachys*
- Sorghum plumosum*
- Croton arnhemicus*
- Corymbia ptychocarpa* subsp. pl

### NTTDMR0001-53582

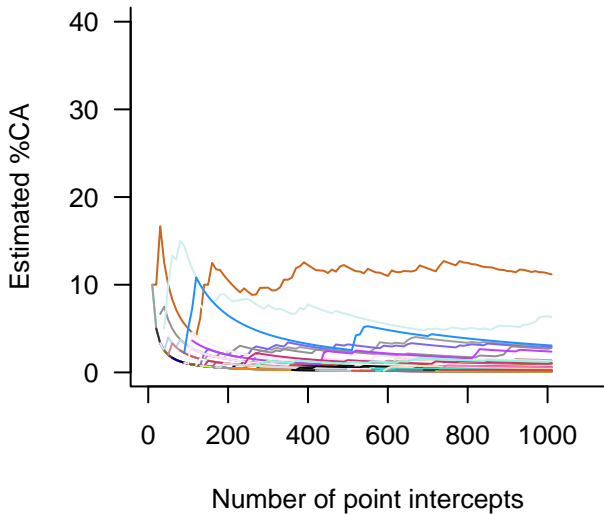

- Melaleuca viridiflora*
- Triodia pungens*
- Scleria rugosa*
- Cenchrus ciliaris*
- Fimbristylis dichotoma*

### NTTDMR0002-53581

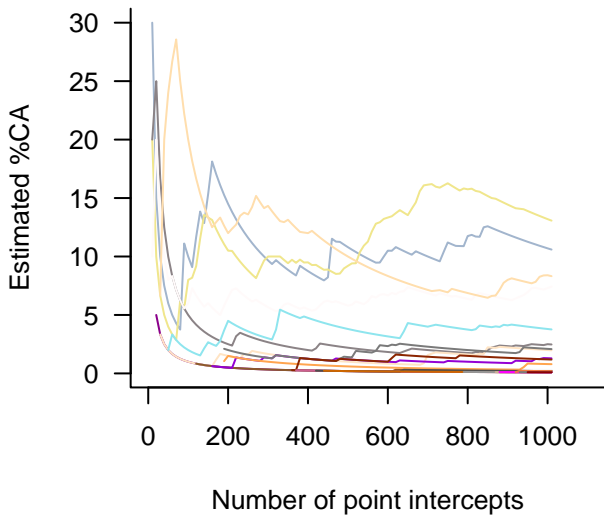

- Cenchrus ciliaris*
- Bauhinia gilva*
- Triodia pungens*
- Fimbristylis dichotoma*
- Aristida inaequiglumis*

### NTTDMR0003-53583

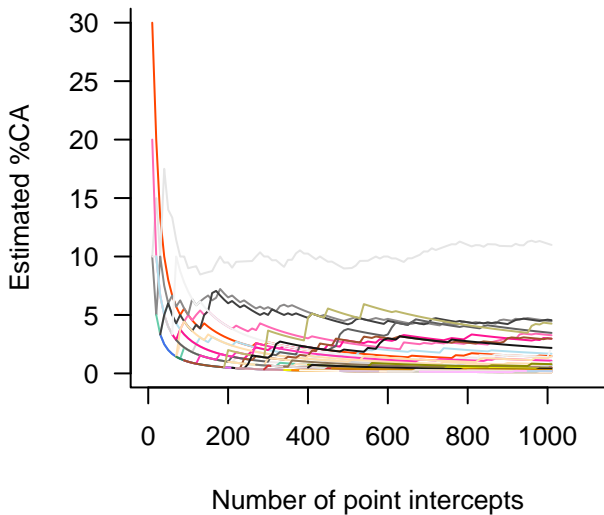

- Fimbristylis dichotoma*
- Aristida holathera* var. *holathera*
- Paspalidium rarum*
- Eucalyptus pruinosa*
- Chrysopogon fallax*



### NTTMGD0001-53521

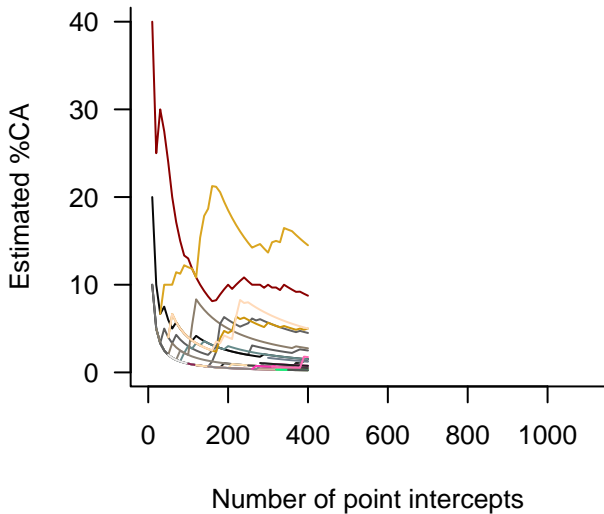

### NTTPCK0001-53584

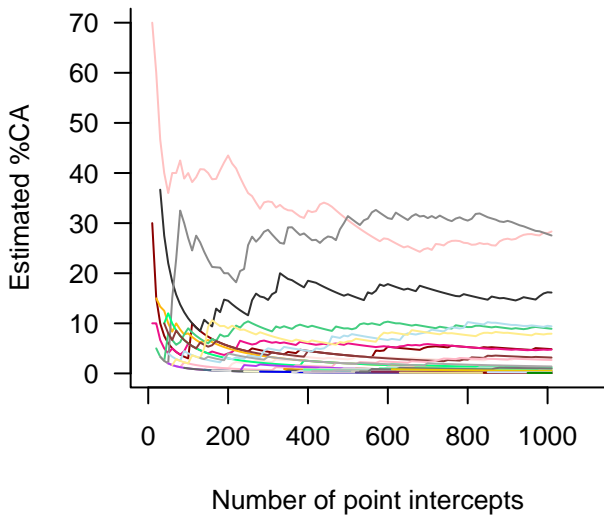

### NTTSTU0001-53585

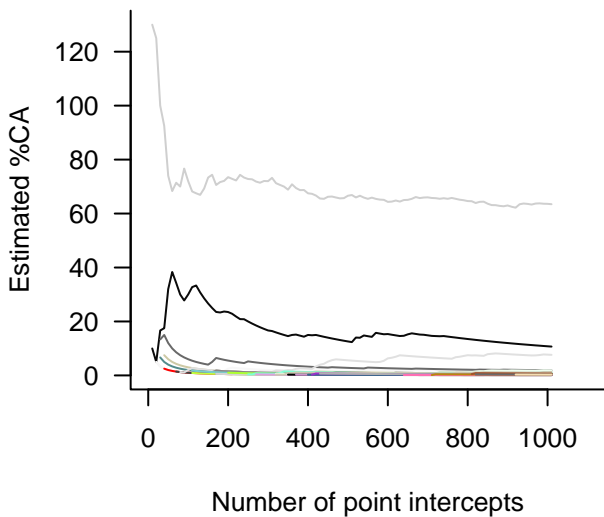

- *Acacia shirleyi*
- *Macropteranthes kekwickii*
- *Mnesithea formosa*
- *Eragrostis cumingii*
- *Chrysopogon fallax*

### QDACHC0001-53592

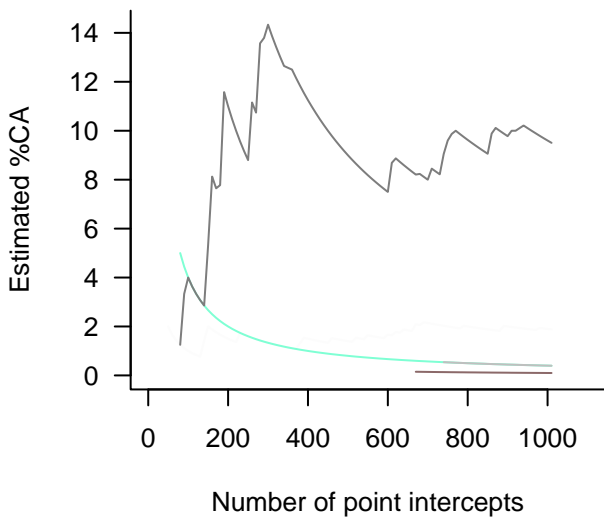

- *Acacia cambagei*
- *Poaceae sp.*
- *Apophyllum anomalum*
- *Eremophila mitchellii*
- *Sida fibulifera*

### QDACHC0002-53593

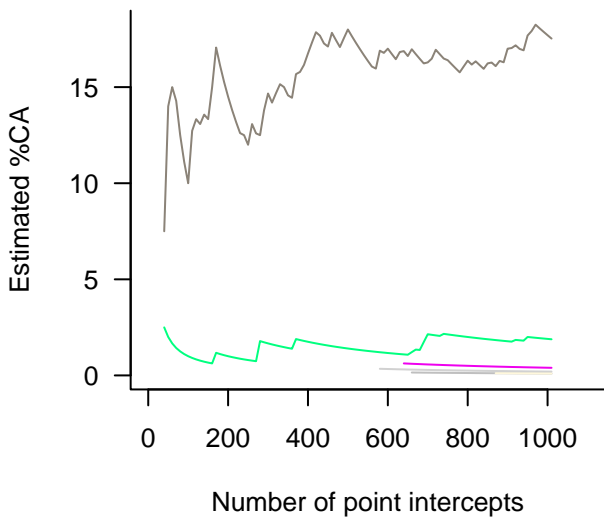

- *Acacia cambagei*
- *Eremophila mitchellii*
- *Amyema quandang var. quandang*
- *Oxychloris scariosa*
- *Salsola australis*

### QDACHC0003-53467

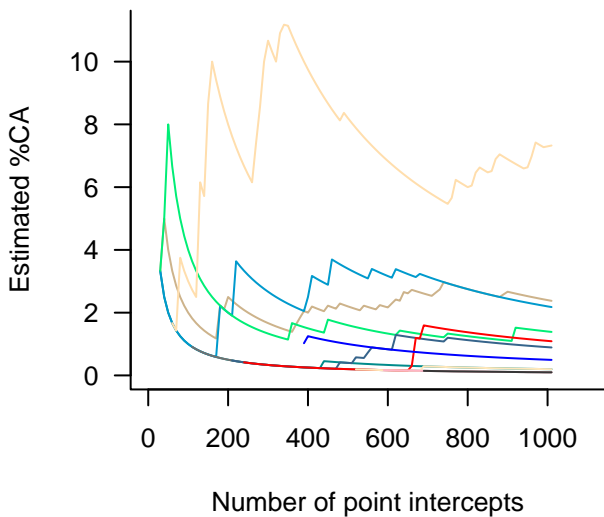

- *Acacia cambagei*
- *Chrysopogon fallax*
- *Flindersia maculosa*
- *Eremophila mitchellii*
- *Archidendropsis basaltica*

### QDACHC0004-53468

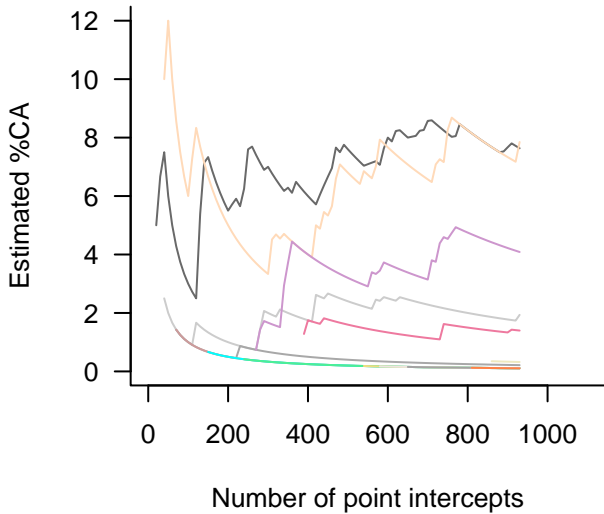

### QDACHC0005-53522

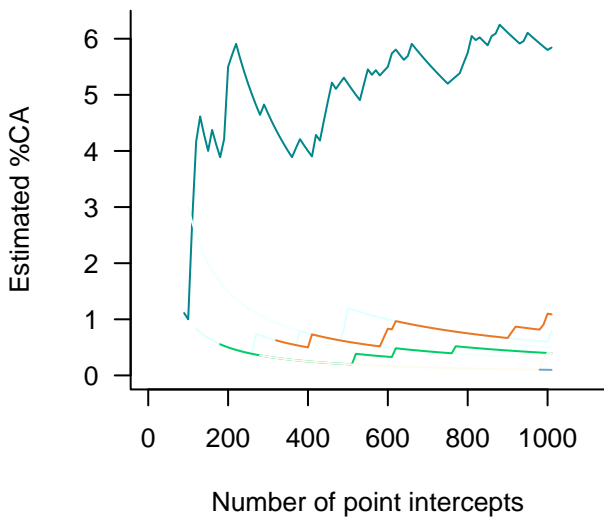

### QDACHC0006-53469

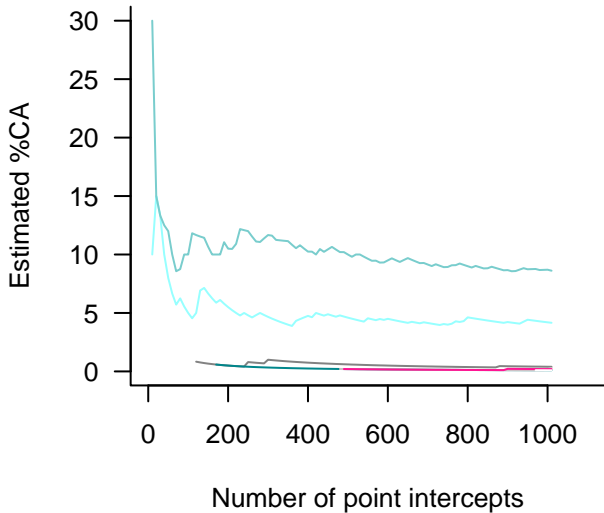

### QDACHC0007-53517

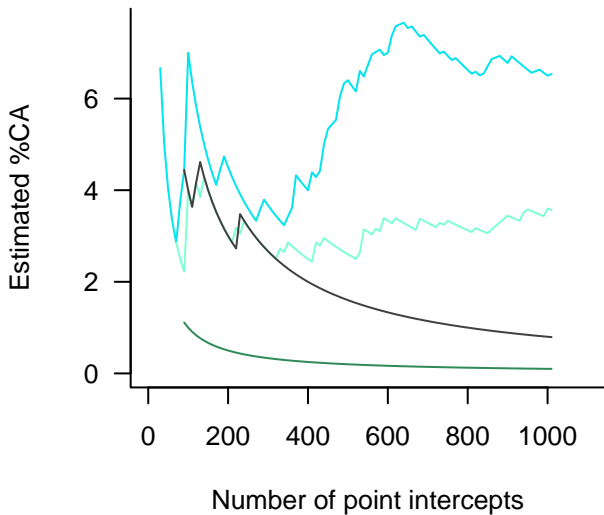

### QDAEIU0001-53470

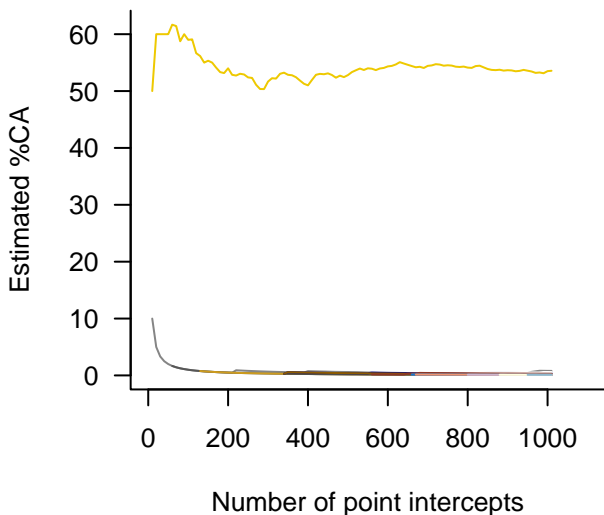

- Dichanthium aristatum*
- Cynodon dactylon*
- Eucalyptus crebra*
- Ophiuros exaltatus*
- Panicum queenslandicum*

### QDAEIU0002-53523

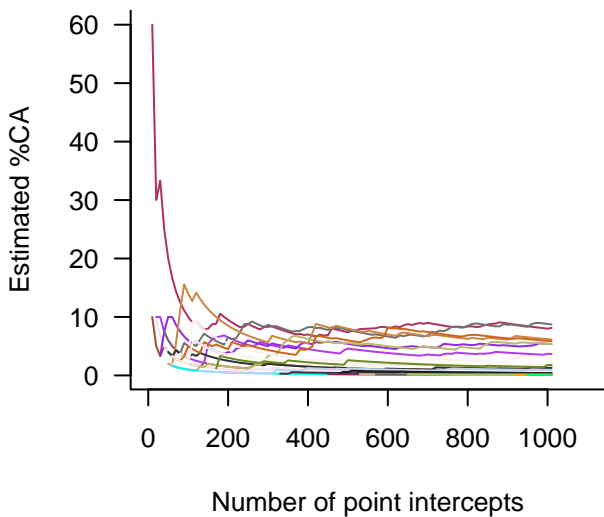

- Themeda quadrivalvis*
- Dichanthium fecundum*
- Eucalyptus crebra*
- Heteropogon triticeus*
- Dichanthium sericeum* subsp. *sericeum*

### QDAEIU0003-53471

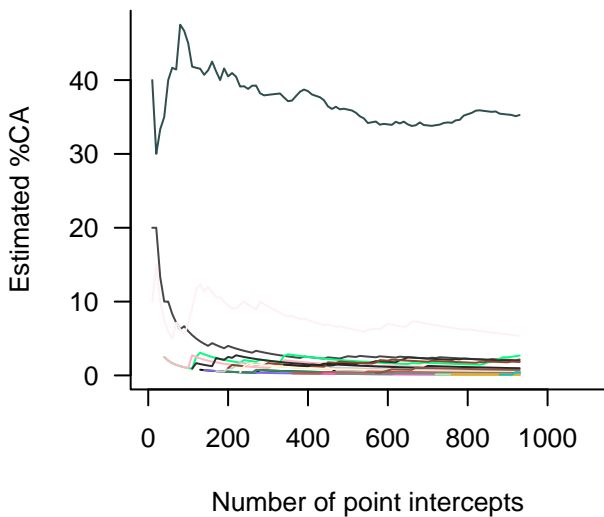

### QDAEIU0004-53524

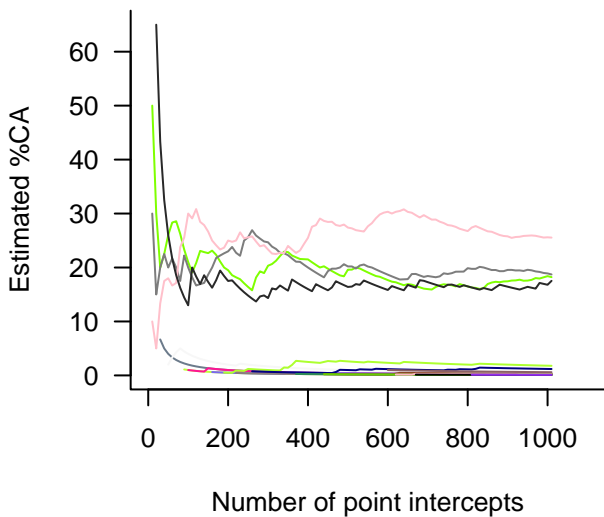

### QDAEIU0005-53472

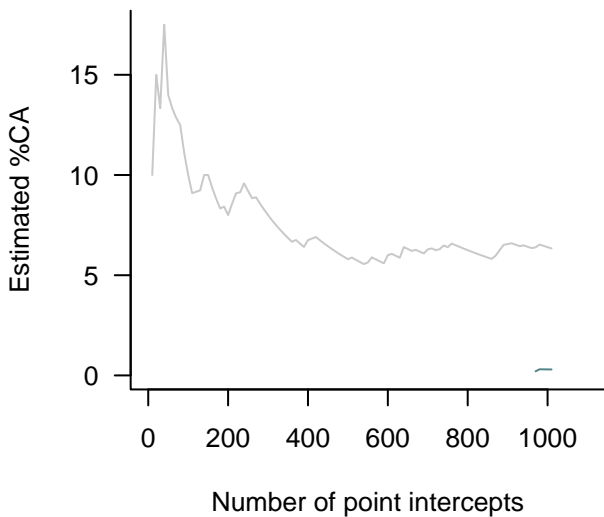

### QDAEIU0006-53473

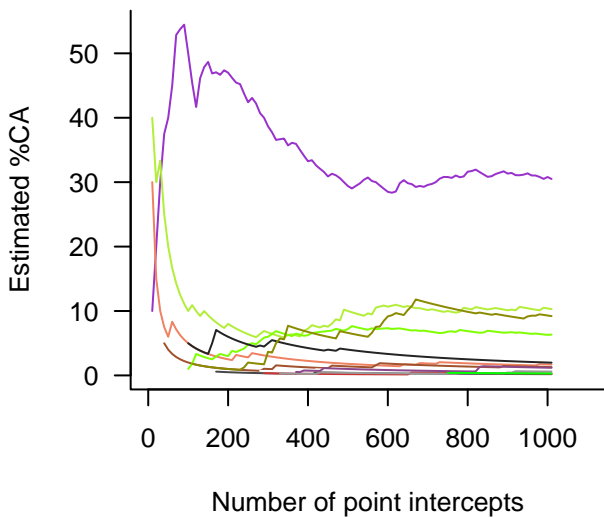



### QDAEIU0007-53474

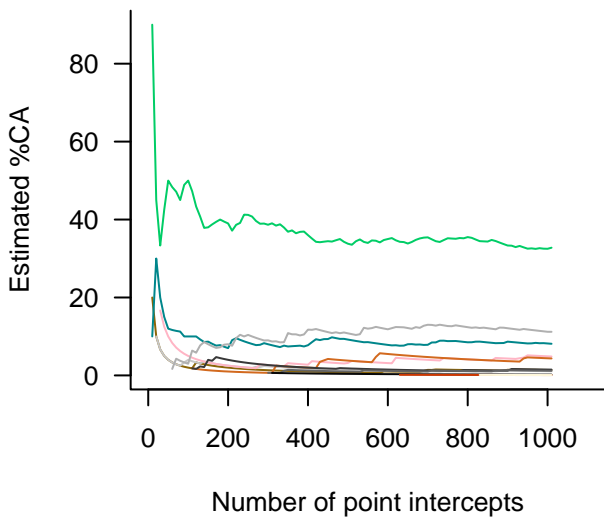

### QDAGUP0001-53526

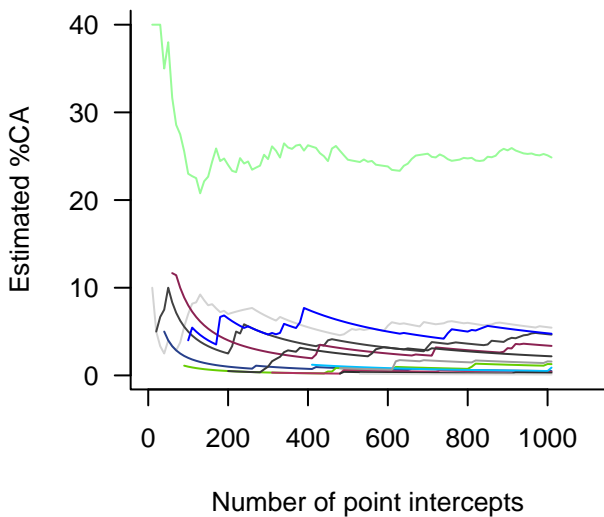

### QDAGUP0002-53475

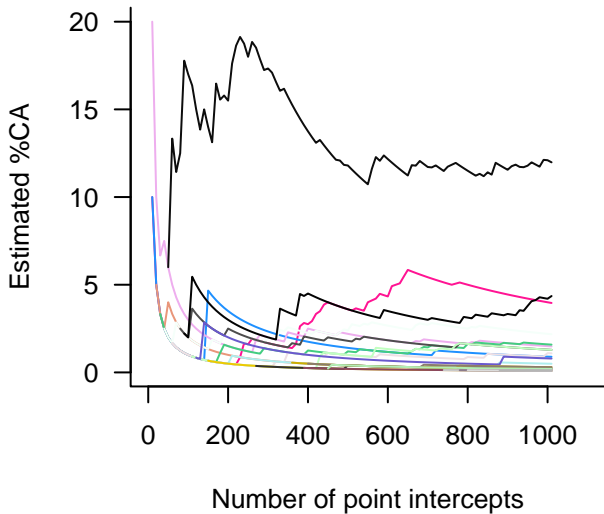

### QDAGUP0003-53527

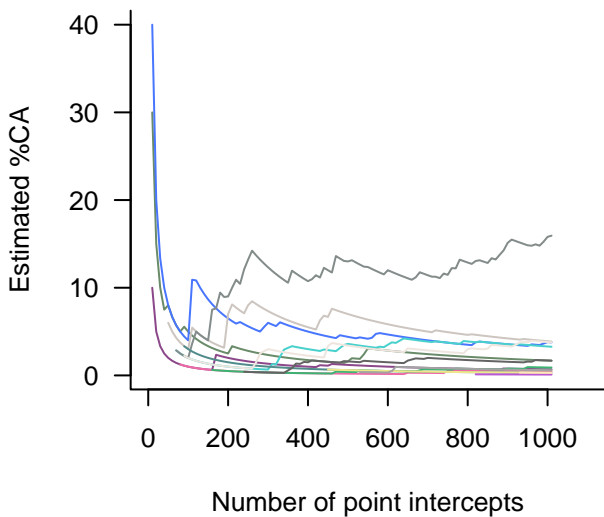

### QDAGUP0004-53476

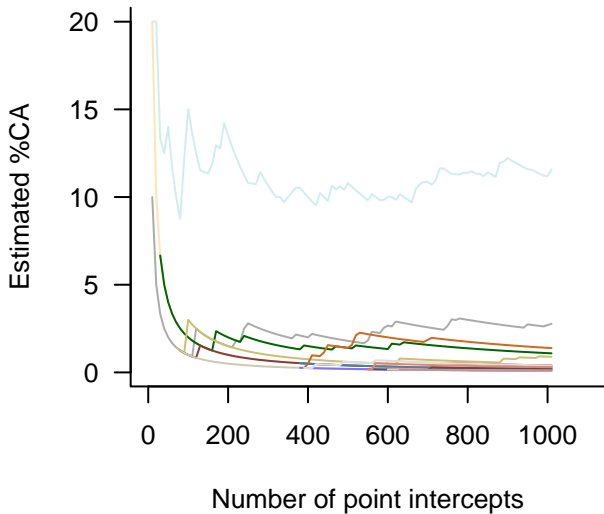

- Lysiphyllum cunninghamii
- Terminalia aridicola subsp. aridic
- Acacia torulosa
- Aristida ingrata
- Carissa spinarum

### QDAGUP0005-53528

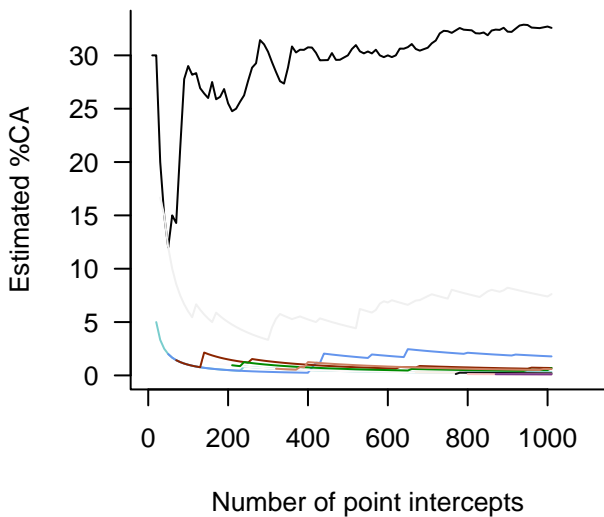

- Melaleuca citrolens
- Lysiphyllum cunninghamii
- Acacia colei var. colei
- Carissa spinarum
- Terminalia aridicola subsp. aridic

### QDAGUP0006-53477

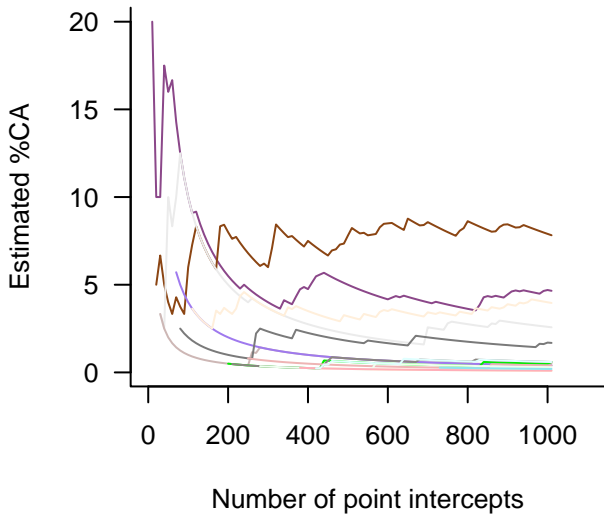

- Lysiphyllum cunninghamii*
- Melaleuca citrolens*
- Carissa spinarum*
- Archidendropsis basaltica*
- Terminalia aridicola* subsp. *aridicola*

### QDAGUP0007-53478

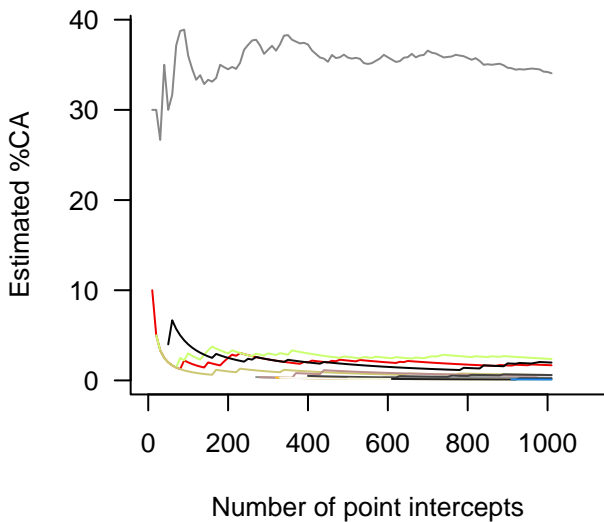

- Aristida latifolia*
- Panicum decompositum* var. *tenellum*
- Dichanthium sericeum* subsp. *sericeum*
- Astrebla pectinata*
- Rhynchosia minima* var. *minima*

### QDAGUP0008-53529

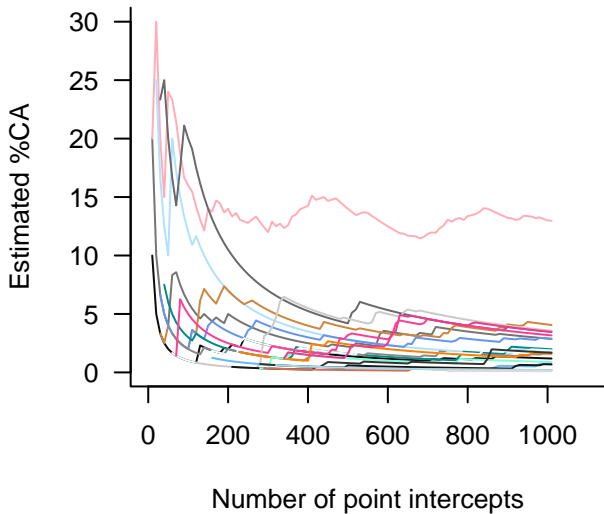

### QDAGUP0009-53530

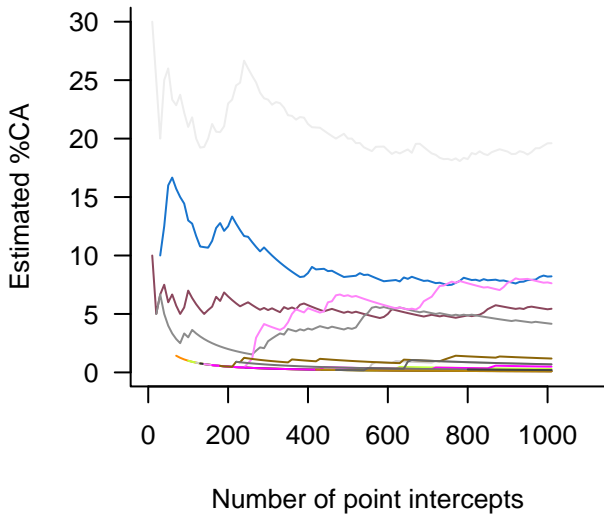

### QDAGUP0010-53479

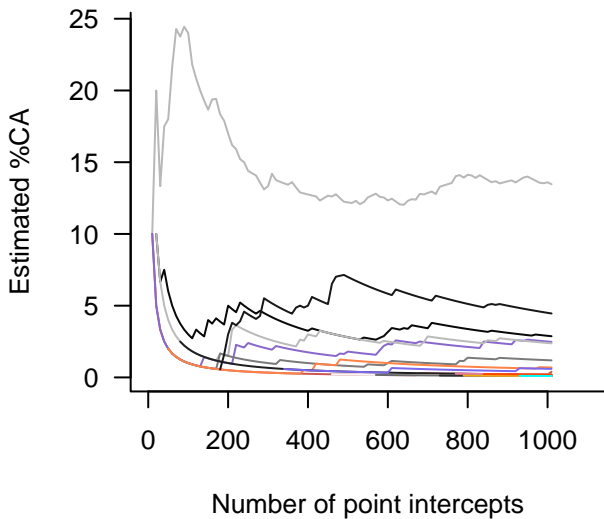

- Melaleuca citrolens
- Lysiphyllum cunninghamii
- Aristida pruinosa
- Aristida sp.
- Carissa spinarum

### QDAGUP0011-53531

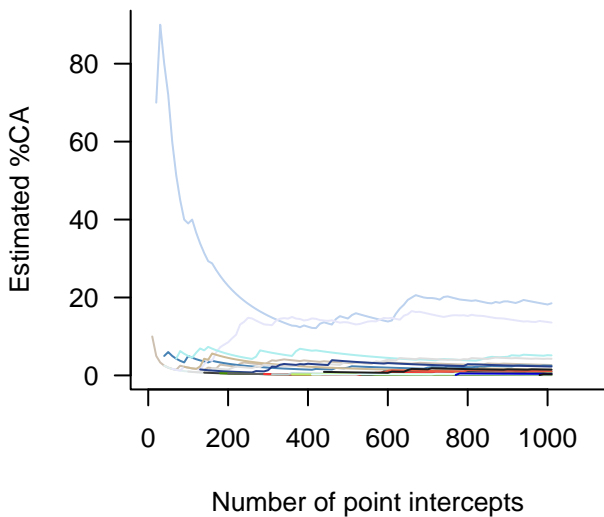

- Lysiphyllum cunninghamii
- Aristida holathera
- Aphyllodium biarticulatum
- Aristida pruinosa
- Heteropogon contortus

### QDAGUP0012-53525

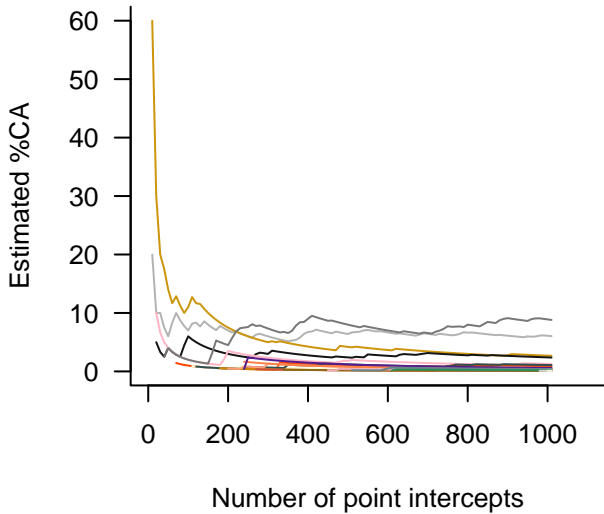

### QDAGUP0013-53532

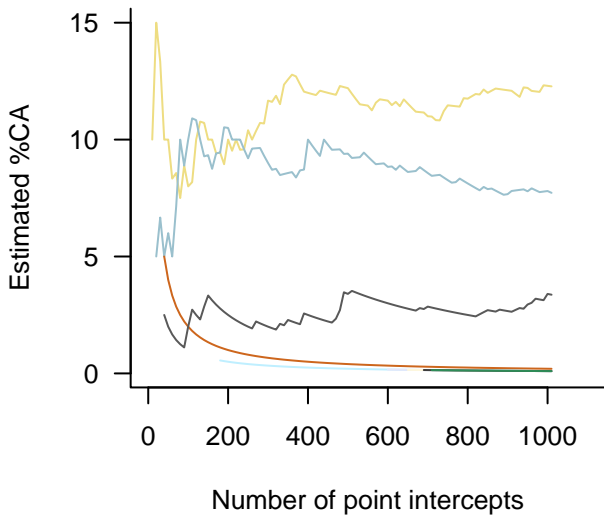

### QDAGUP0014-53480

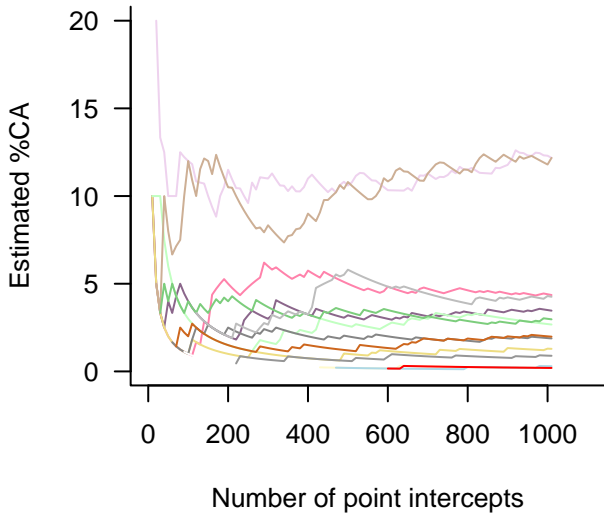

- Astrebla squarrosa*
- Sarga timorensis*
- Panicum decompositum* var. *dec.*
- Eulalia aurea*
- Brachyachne tenella*

### QDAGUP0015-53533

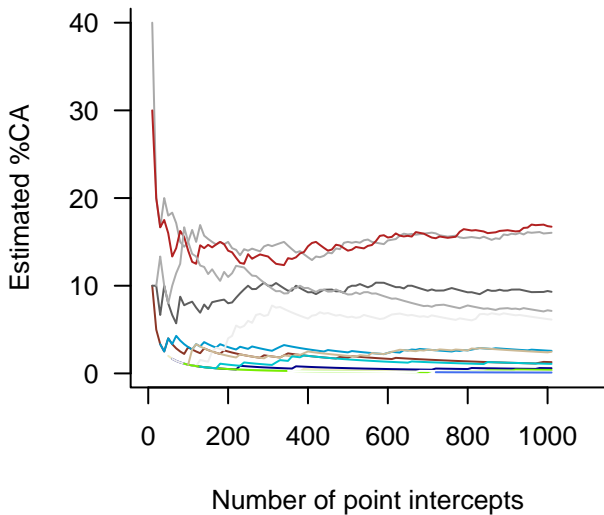

- Panicum decompositum* var. *ten.*
- Eulalia aurea*
- Astrebla squarrosa*
- Aristida latifolia*
- Chrysopogon fallax*



### QDAGUP0016-53481

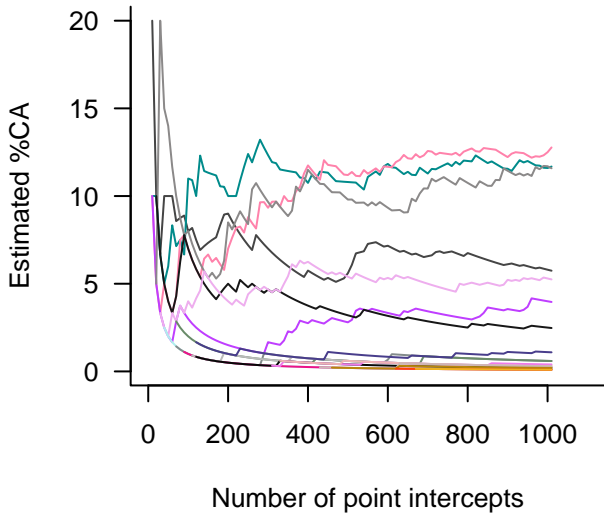

- Astrebla elymoides*
- Aristida latifolia*
- Eucalyptus microtheca*
- Brachyachne tenella*
- Panicum decompositum* var. *tenellum*

### QDAGUP0017-53568

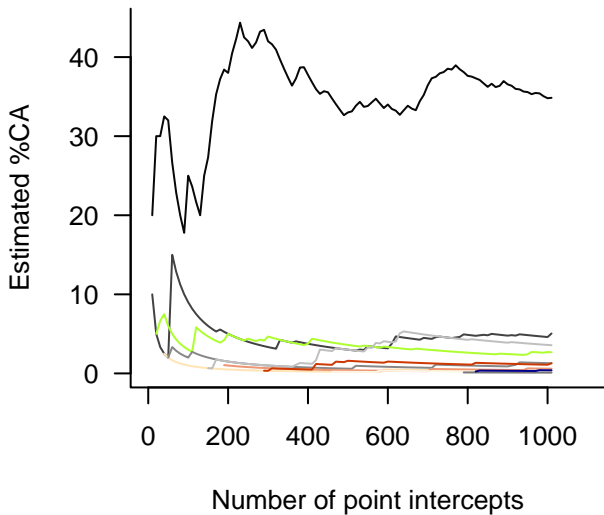

- Leptochloa fusca*
- Pseudoraphis spinescens*
- Oryza australiensis*
- Tecticornia indica* subsp. *indica*
- Excoecaria parvifolia*

### QDAGUP0018-53482

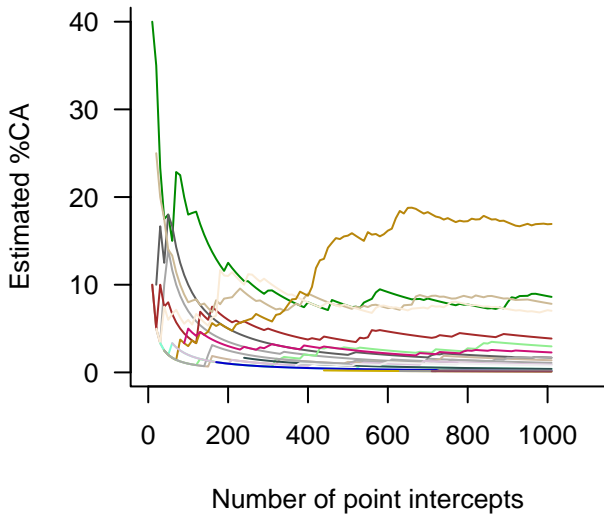

- Melaleuca sp.
- Eucalyptus microtheca
- Panicum mindanaense
- Eragrostis parviflora
- Dichanthium fecundum

### QDAGUP0019-53534

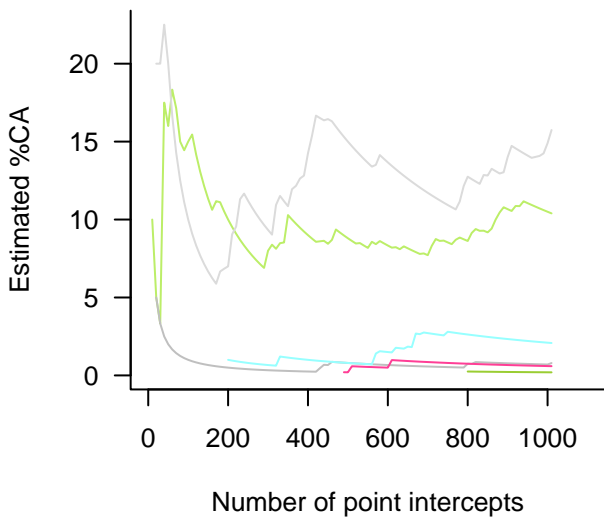

- Sporobolus virginicus
- Tecticornia indica subsp. indica
- Diplachne fusca var. fusca
- Sesuvium portulacastrum
- Xerochloa imberbis

### QDAGUP0020-53483

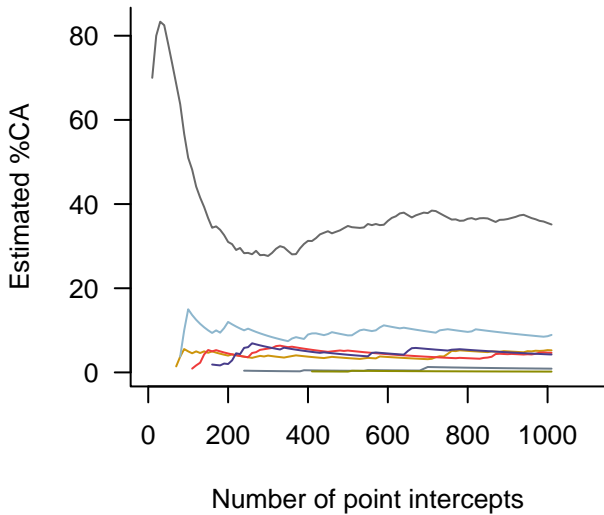

- Sporobolus virginicus
- Tecticornia indica subsp. indica
- Xerochloa imberbis
- Cressa australis
- Poaceae sp.

### QDAGUP0021-53535

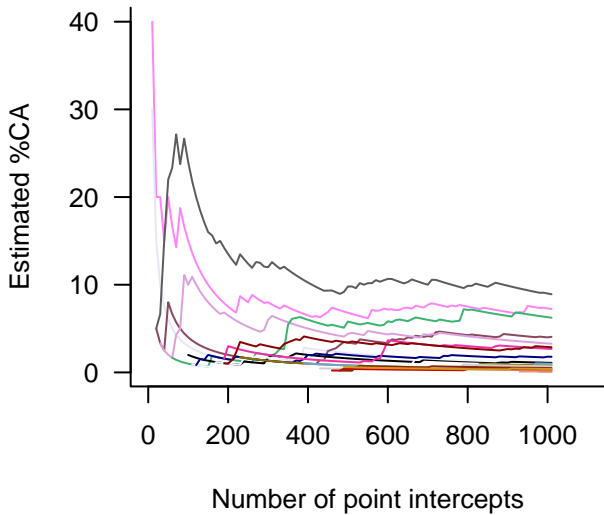

- Terminalia subacroptera
- Hakea arborescens
- Corymbia bella
- Flueggea virosa subsp. melanthi
- Exocarpos latifolius

### QDAGUP0022-53484

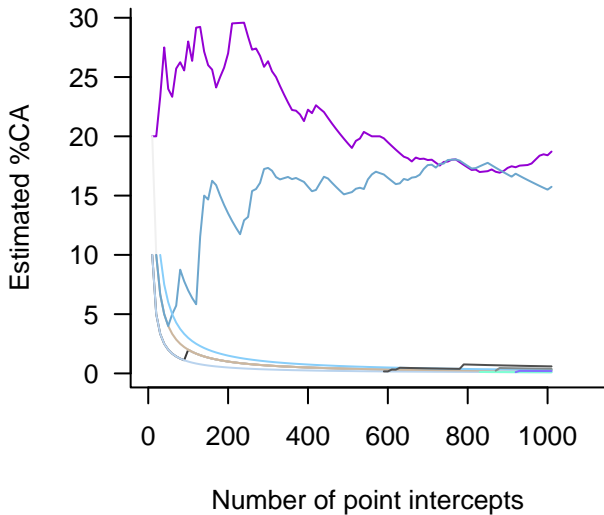

- Xerochloa imberbis
- Tecticornia indica
- Tecticornia pergranulata subsp.
- Sporobolus australasicus
- Cyperus sp.

### QDAGUP0023-53536

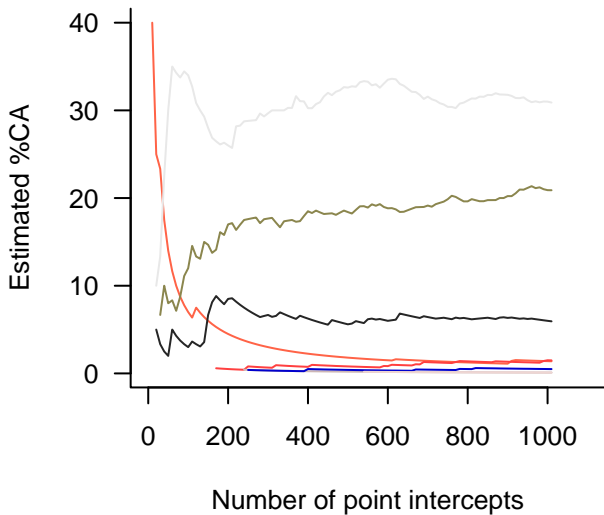

- Cyperus sp.
- Oryza australiensis
- Ophiuros exaltatus
- Panicum decompositum var. tenellum
- Sporobolus virginicus

### QDAGUP0024-53485

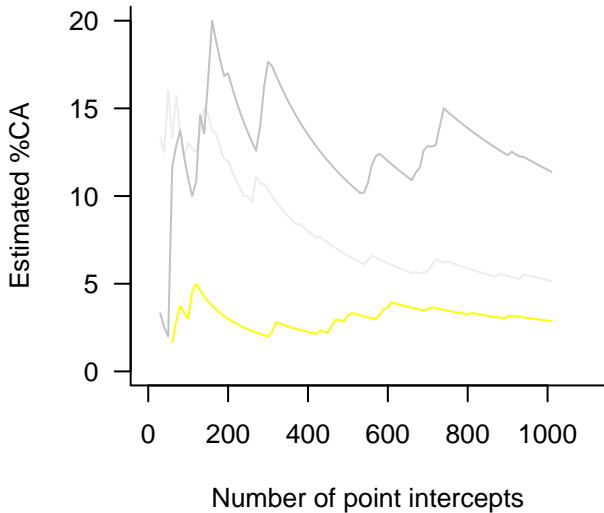

### QDAGUP0025-53537

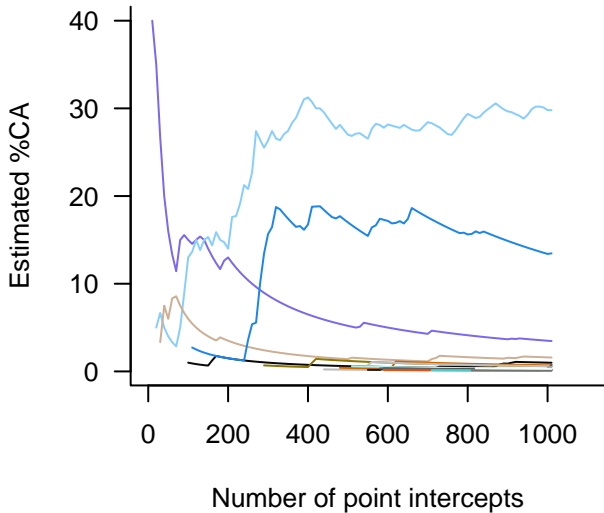

### QDAGUP0026-53486

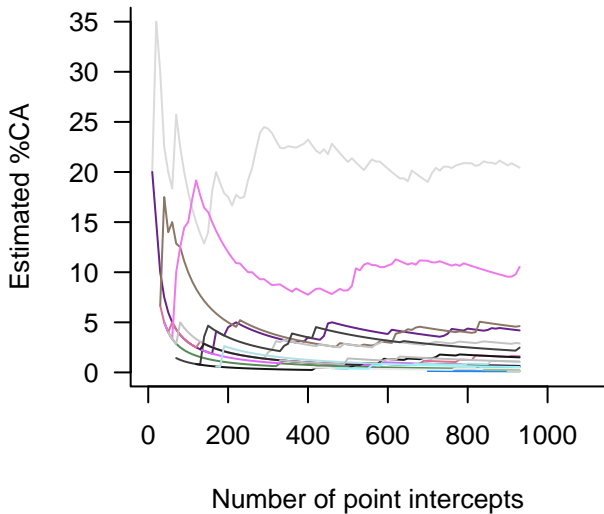

### QDAGUP0027-53538

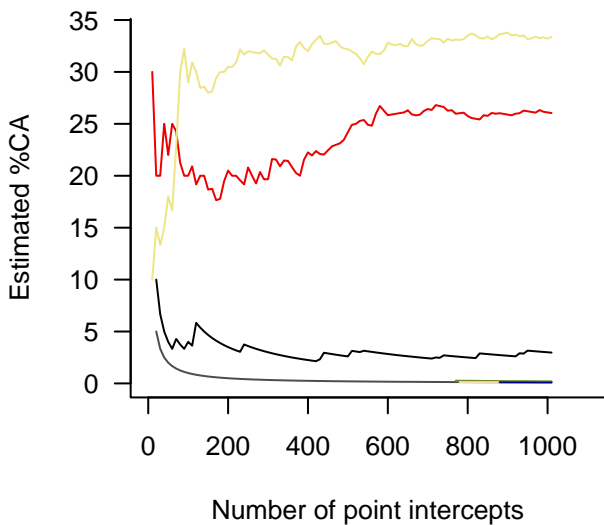

### QDAGUP0028-53487

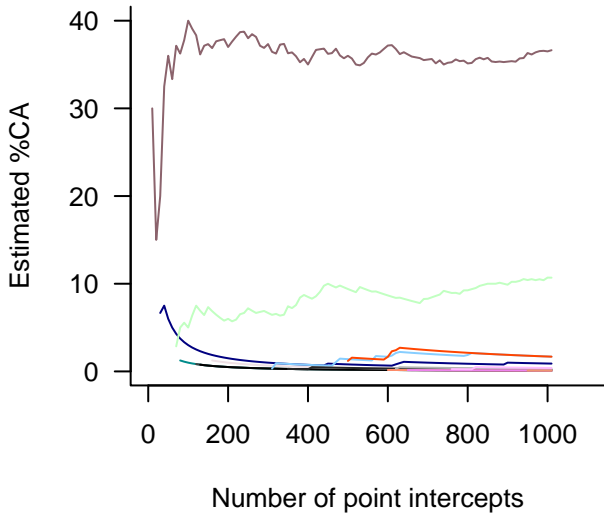

- Melaleuca citrolens
- Excoecaria parvifolia
- Gardenia vilhelmii
- Aristida sp.
- Terminalia volucris

### QDAGUP0029-53488

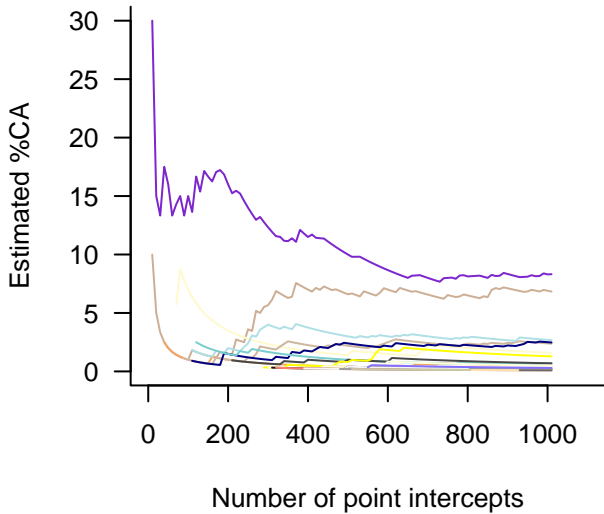

- Pheidochloa gracilis
- Melaleuca viridiflora
- Schizachyrium fragile
- Eriachne obtusa
- Thaumastochloa brassii

### QDAGUP0030-53489

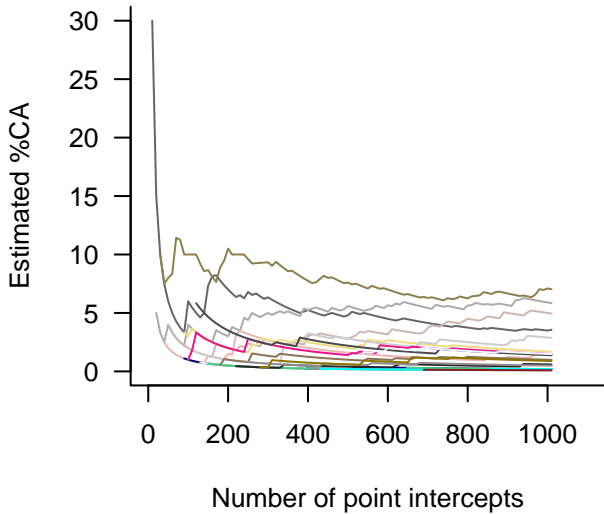

### QDAGUP0031-53490

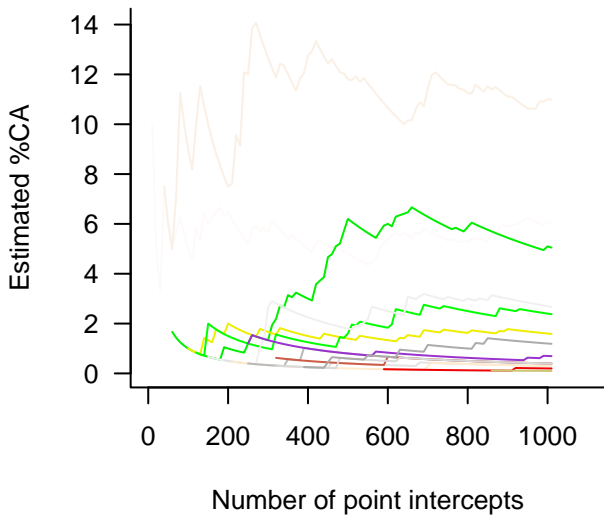



### QDAMGD0001-53586

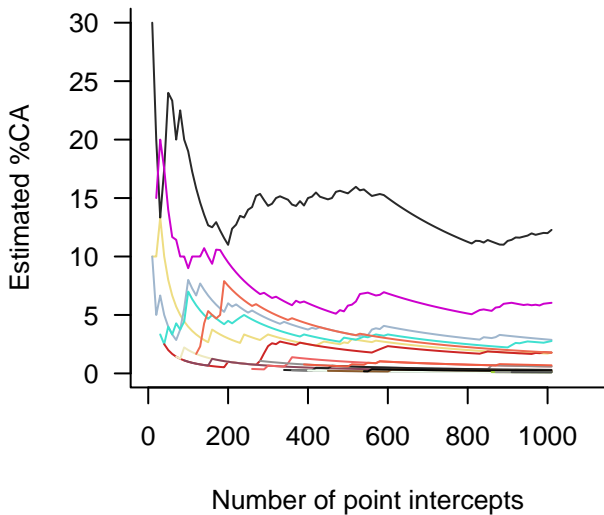

- *Astrelba pectinata*
- *Dichanthium sericeum* subsp. *se*
- *Aristida latifolia*
- *Panicum decompositum* var. *dec*
- *Astrelba elymoides*

### QDAMGD0002-53587

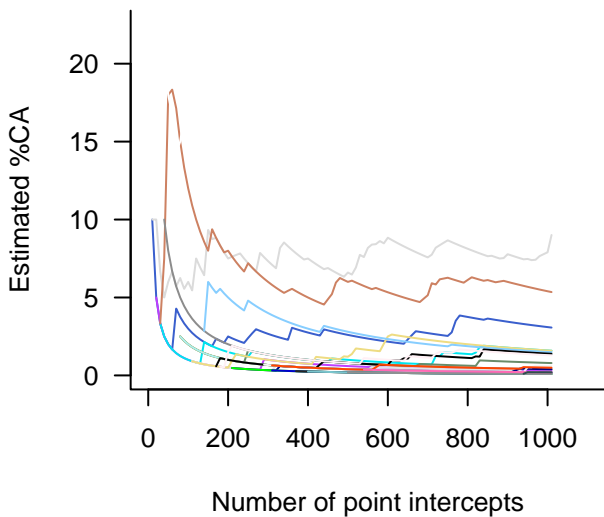

- *Eucalyptus coolabah*
- *Cenchrus ciliaris*
- *Poaceae* sp.
- *Paspalidium jubiflorum*
- *Lysiphyllum carronii*

### QDAMGD0003-53491

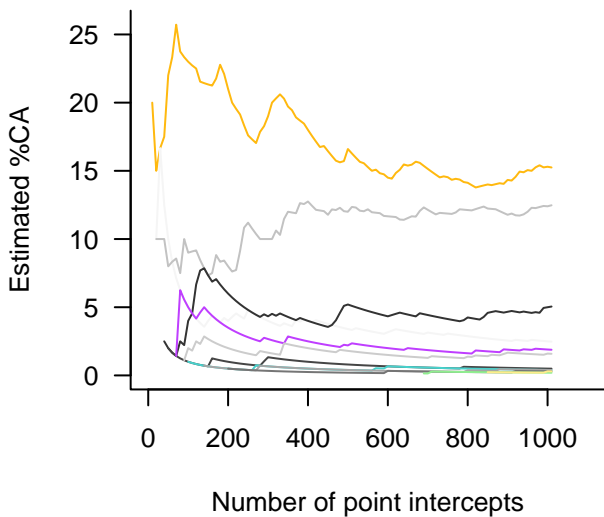

- Panicum decompositum* var. *tenellum*
- Astrebla lappacea*
- Dichanthium sericeum* subsp. *sericeum*
- Iseilema vaginiflorum*
- Aristida latifolia*

### QDAMGD0004-53588

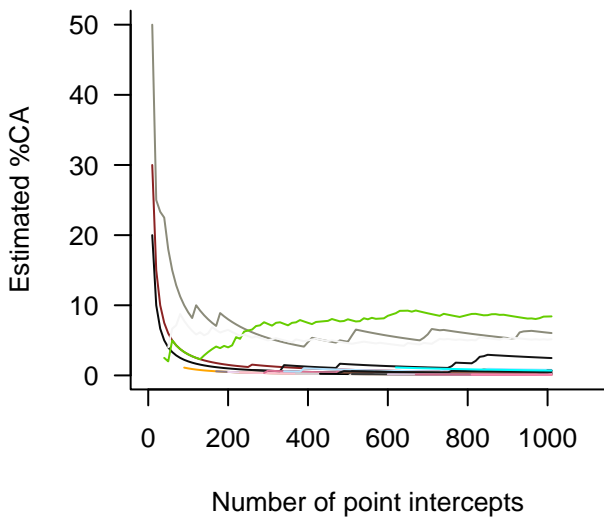

- Dactyloctenium radulans*
- Acacia cambagei*
- Sclerolaena calcarata*
- Acacia tephrina*
- Enchylaena tomentosa*

### QDAMGD0005-53589

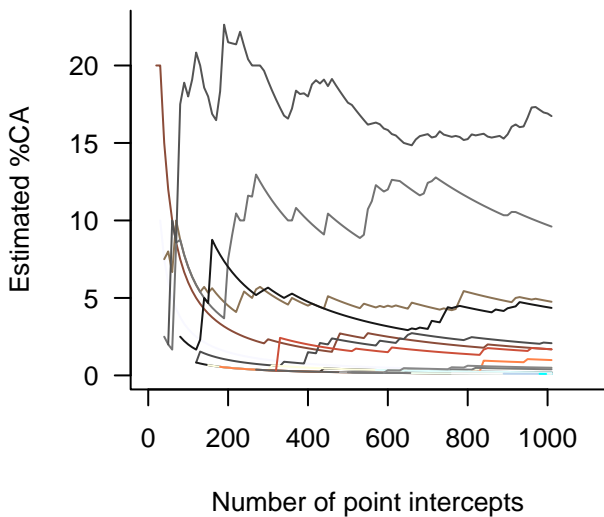

- *Cenchrus ciliaris*
- *Eucalyptus coolabah*
- *Cyperus iria*
- *Poaceae sp.*
- *Eragrostis setifolia*

### QDAMGD0006-53492

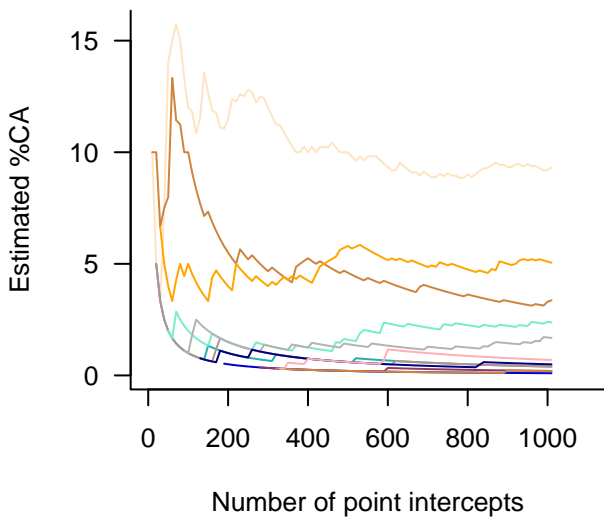

- *Panicum decompositum var. tenellum*
- *Astrebala lappacea*
- *Aristida latifolia*
- *Digitaria divaricatissima var. divaricata*
- *Astrebala elymoides*

### QDAMGD0007-53590

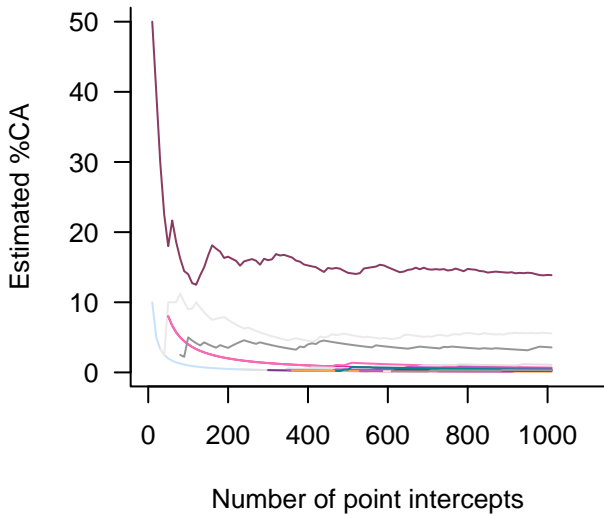

### QDAMGD0008-53493

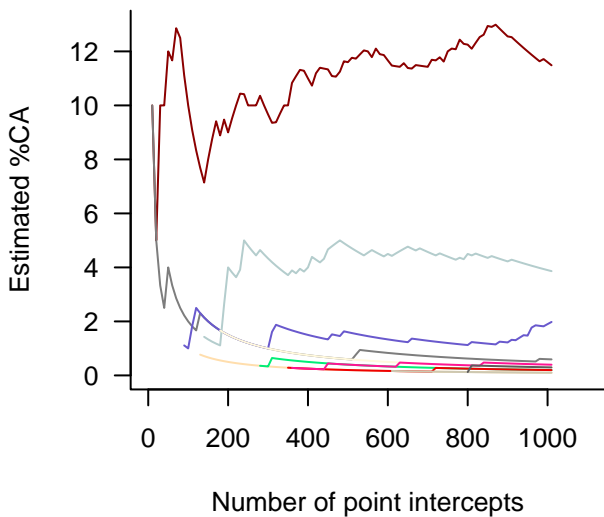

### QDAMGD0009-53494

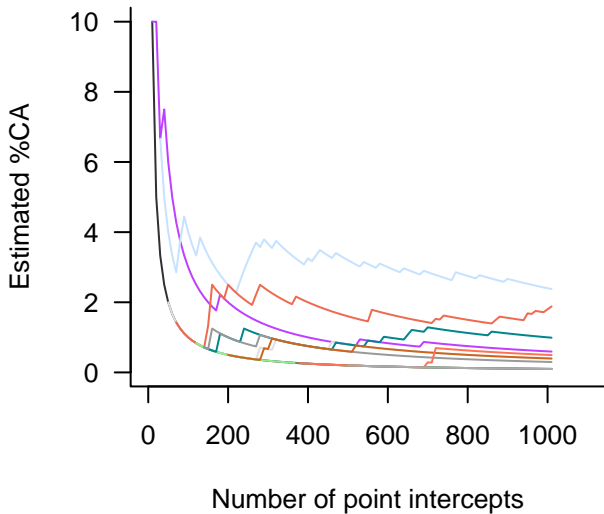

### QDAMGD0010-53591

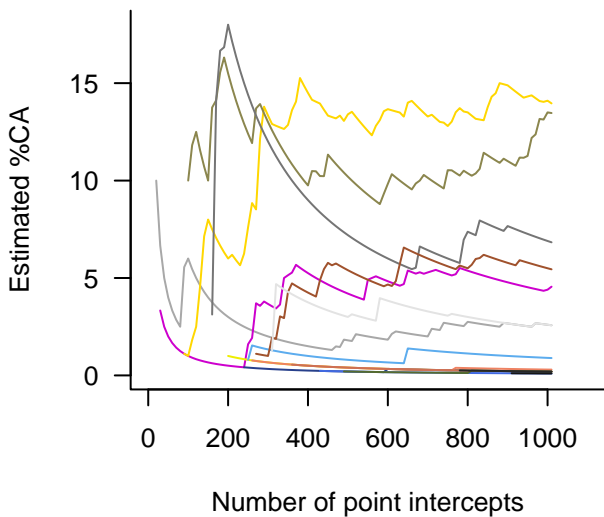

### QDAMGD0011-53495

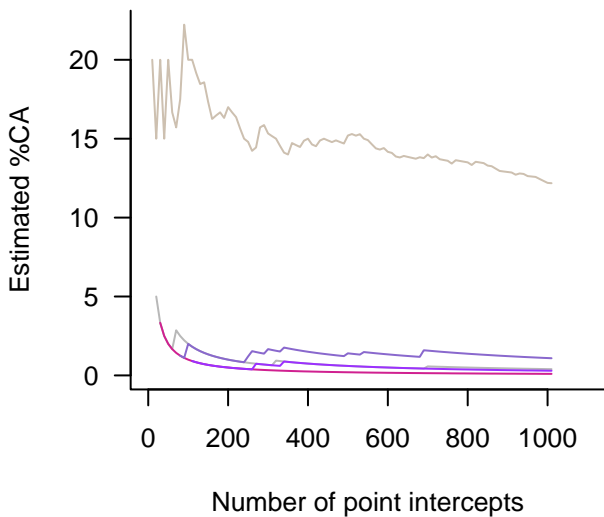

- *Astrebla* sp.
- *Astrebla squarrosa*
- *Aristida* sp.
- *Sclerolaena calcarata*
- *Enneapogon avenaceus*

### QDAMGD0012-53496

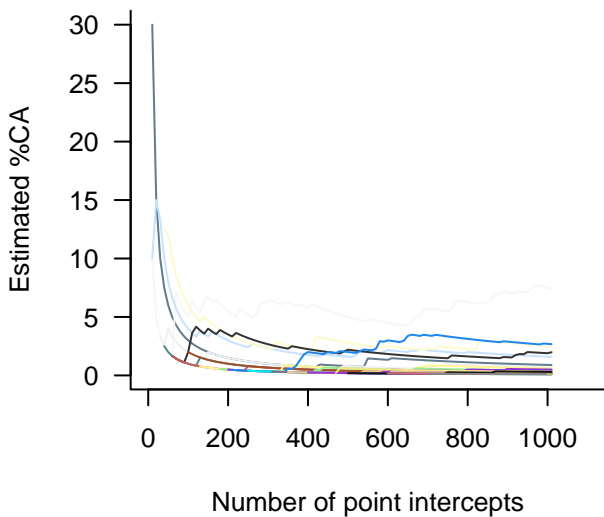

- *Eremophila mitchellii*
- *Senna artemisioides* subsp. *alici*
- *Acacia tephрина*
- *Senna phyllodinea*
- *Senna artemisioides* subsp. *zygophylla*

### QDAMGD0013-53539

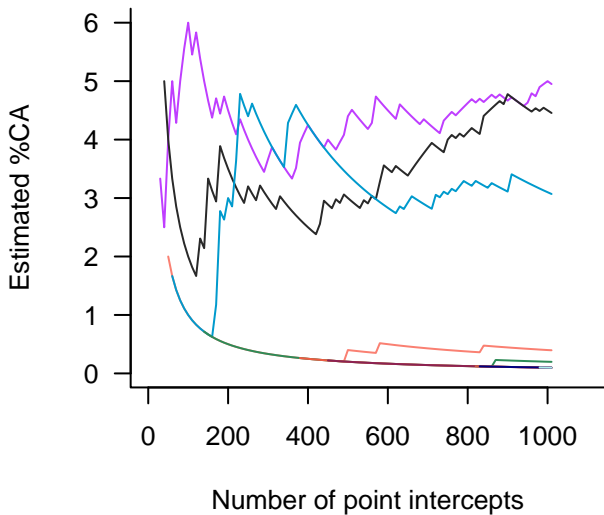

- Aristida latifolia*
- Astrebla pectinata*
- Astrebla elymoides*
- Neptunia dimorphantha*
- Sclerolaena bicornis* var. *bicornis*

### QDAMGD0014-53497

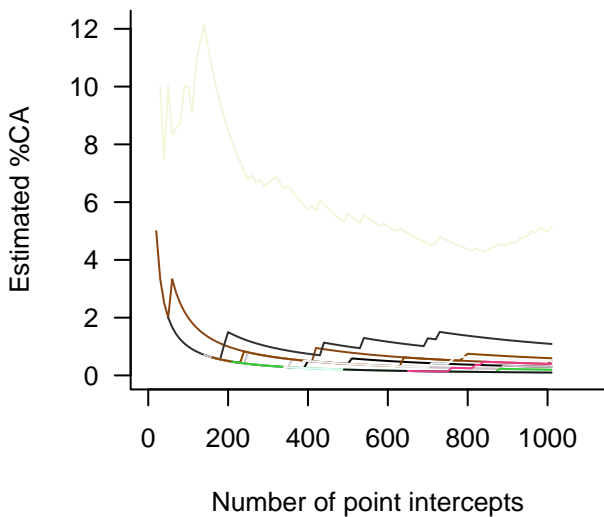

- Astrebla squarrosa*
- Eragrostis setifolia*
- Aristida* sp.
- Iseilema vaginiflorum*
- Astrebla pectinata*

### QDAMGD0015-53540

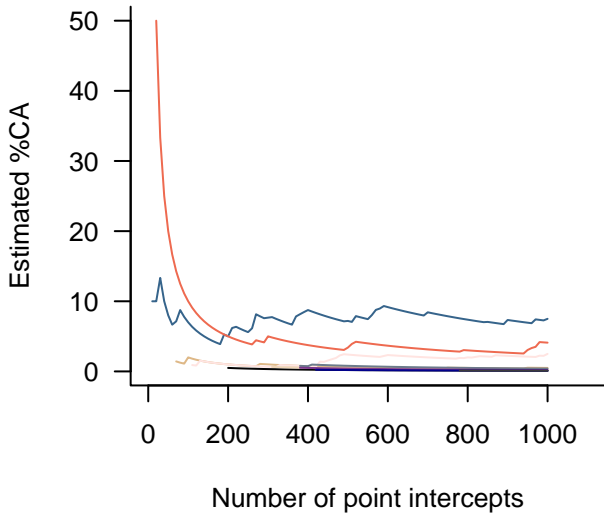

### QDAMGD0016-53498

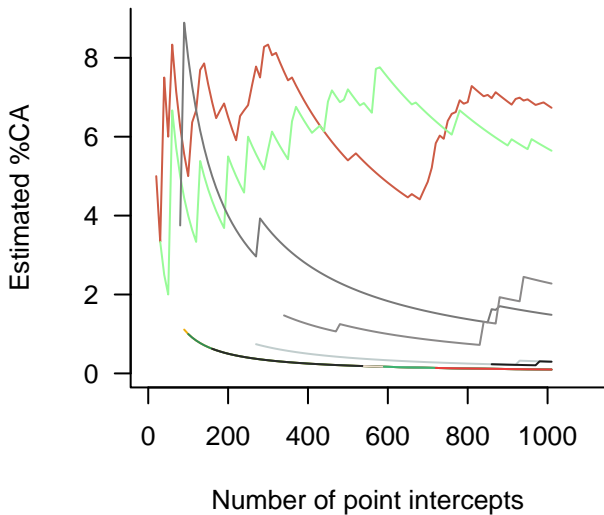



### QDAMGD0017-53499

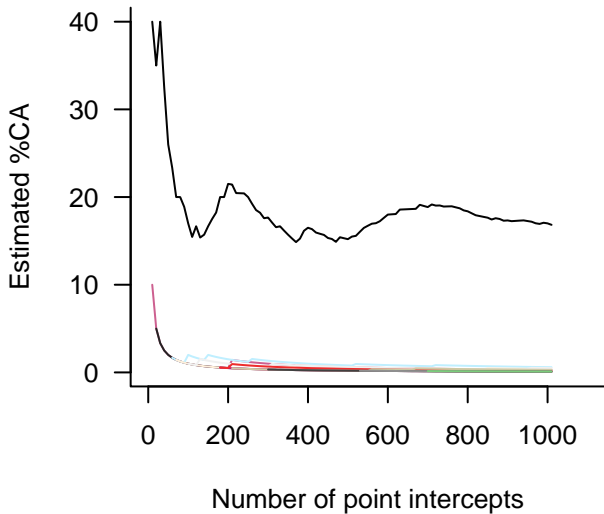

### QDAMGD0018-53541

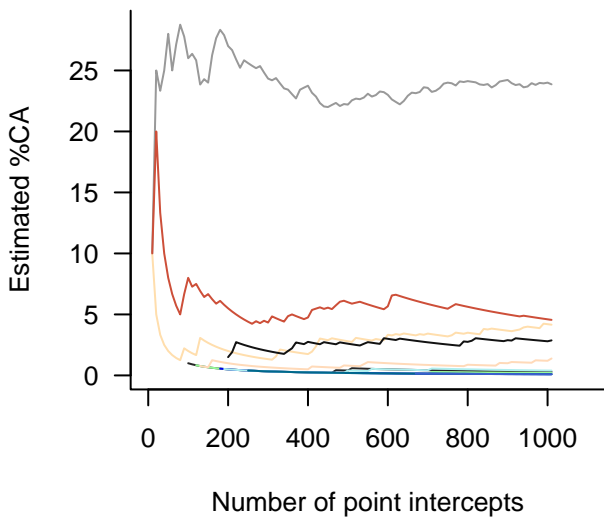

### QDAMGD0019-53542

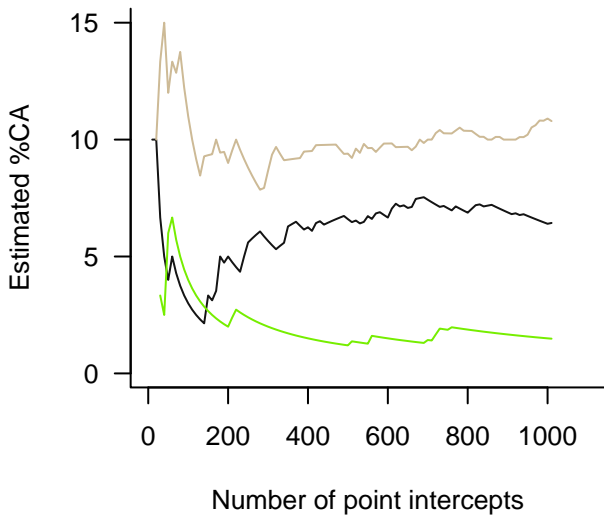

### QDAMGD0020-53500

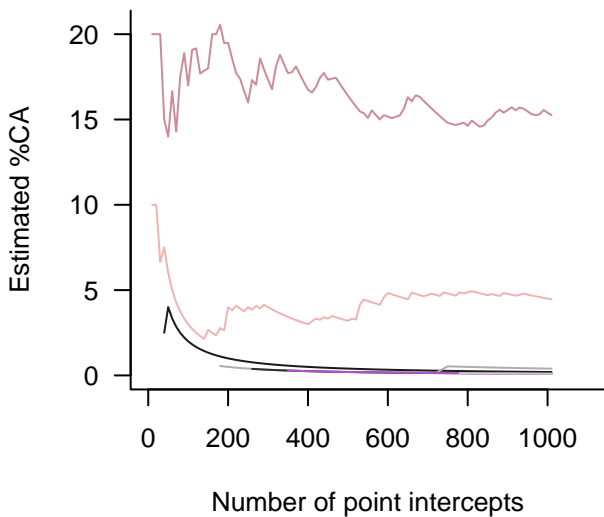

### QDAMGD0021-53543

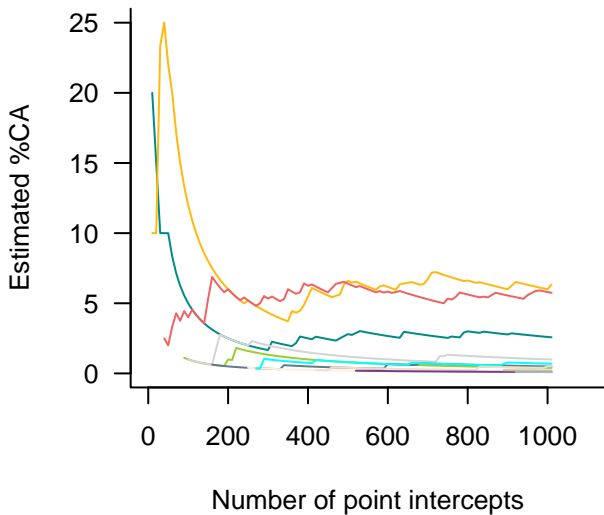

### QDAMGD0022-53501

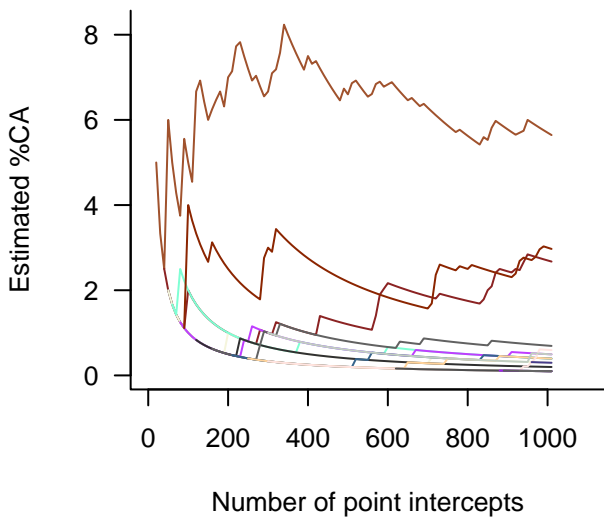

### QDAMGD0023-53544

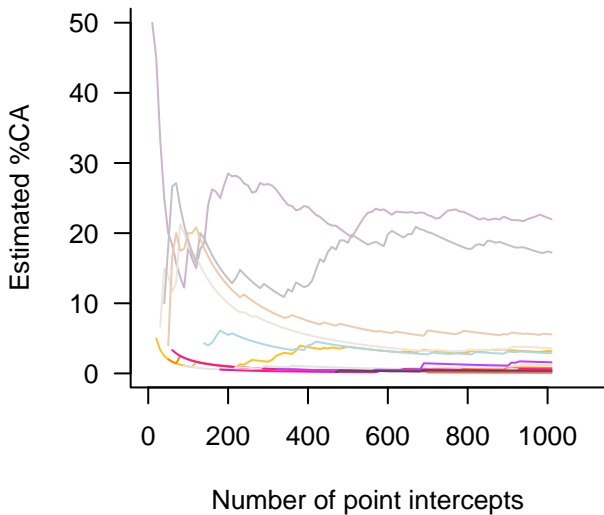

### QDAMGD0024-53502

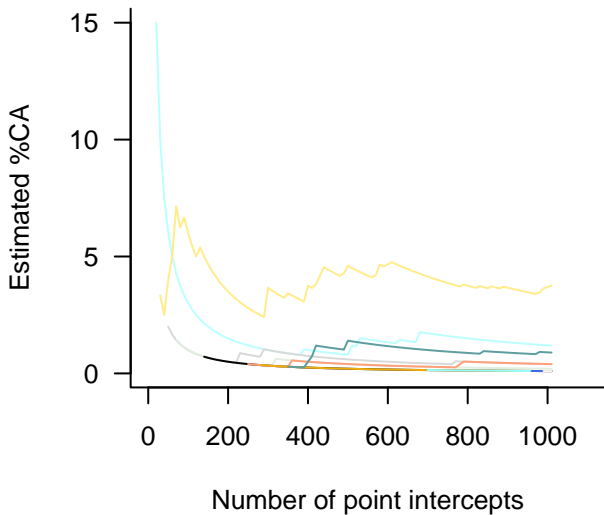

### QDAMGD0025-53545

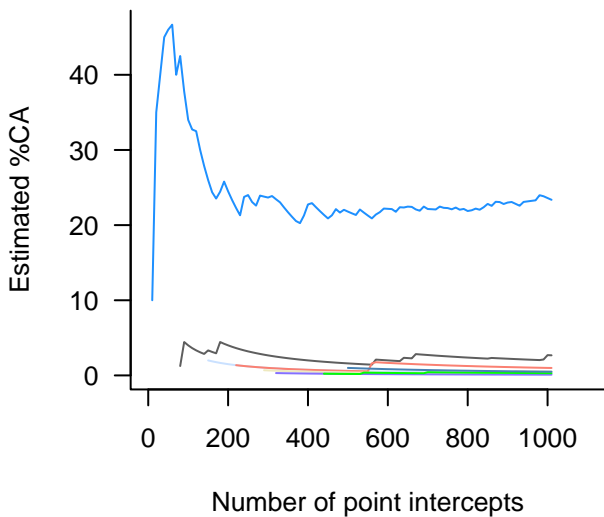

### QDAMGD0026-53503

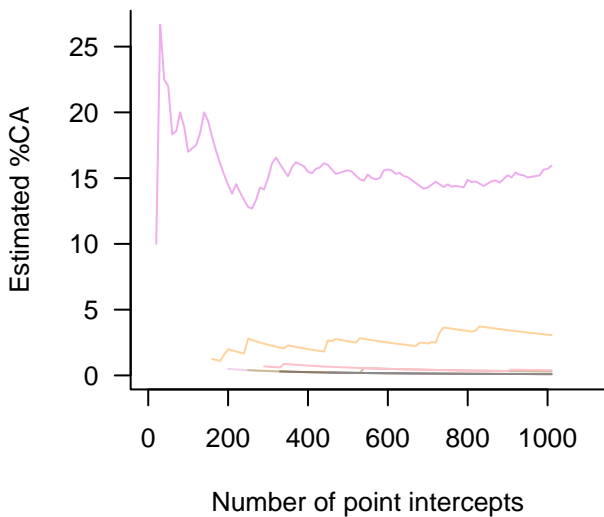

### QDAMGD0027-56936

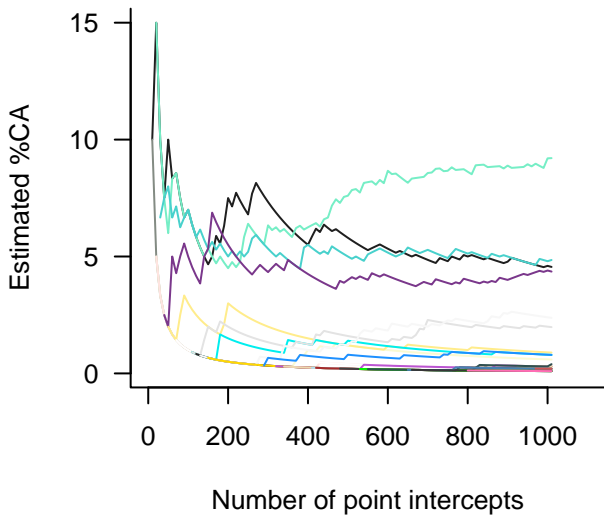

### QDAMGD0028-56937

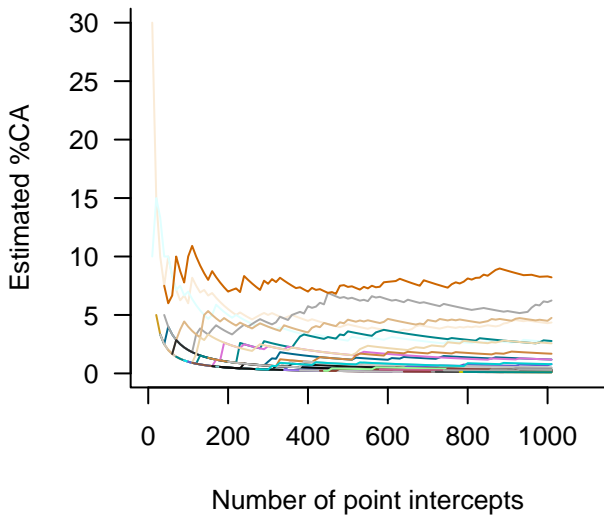

### QDAMII0001-53504

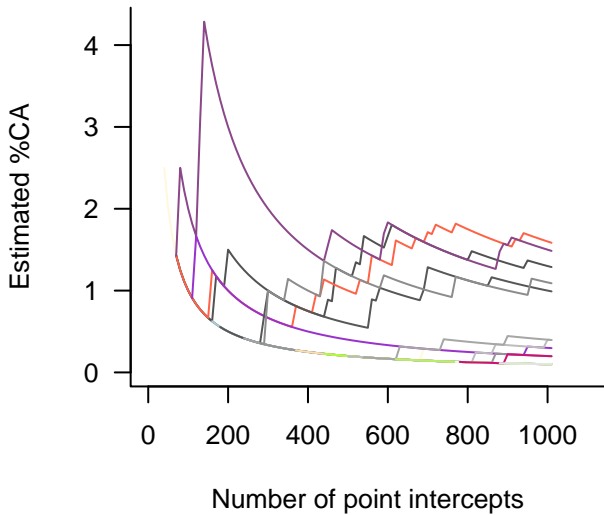

### QDAMII0002-53546

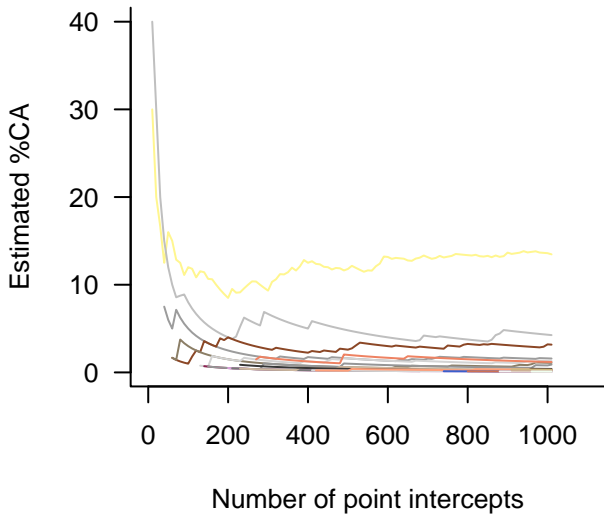

### QDAMUL0001-53594

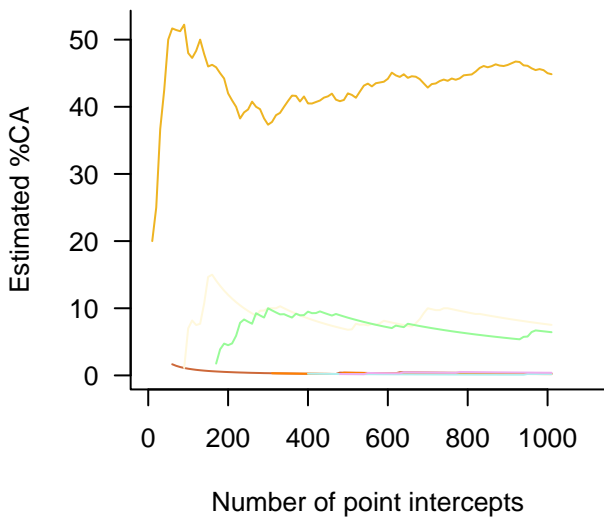

- Acacia aneura var. major
- Eucalyptus melanophloia x e. wt
- Eucalyptus populnea
- Digitaria brownii
- Eragrostis lacunaria

### QDAMUL0002-53505

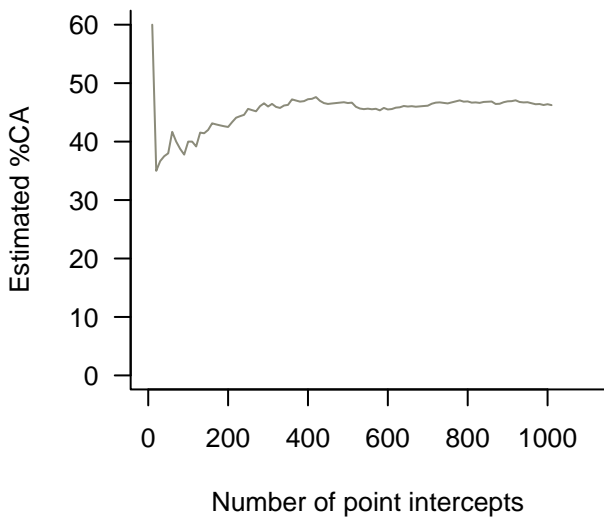

- Acacia shirleyi



### QDAMUL0003-53595

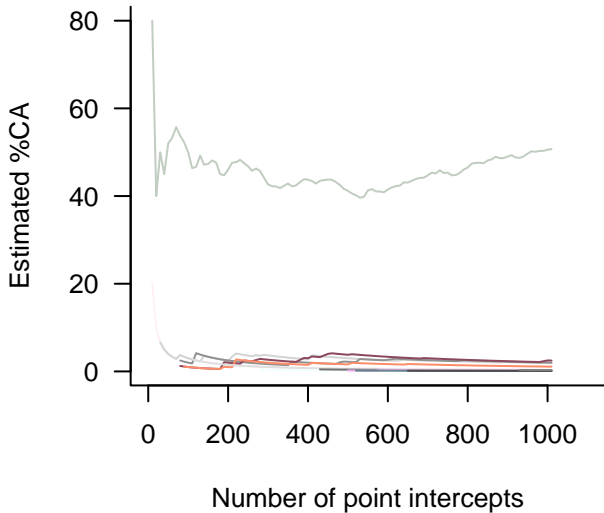

- *Acacia aneura* var. *major*
- *Thyridolepis xerophila*
- *Hibiscus sturtii*
- *Eucalyptus crebra* x *e. melanophloea*
- *Digitaria brownii*

### QDASSD0001-53756

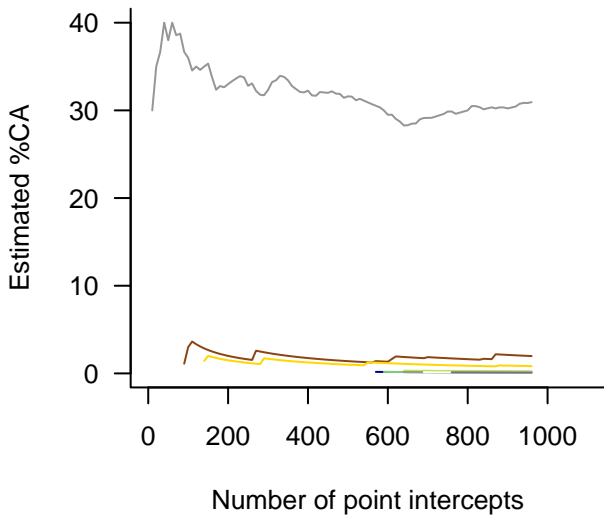

- *Triodia basedowii*
- *Grevillea stenobotrya*
- *Crotalaria eremaea* subsp. *eremaea*
- *Trachymene glaucifolia*
- *Acacia ligulata*

### QDASSD0001-57621

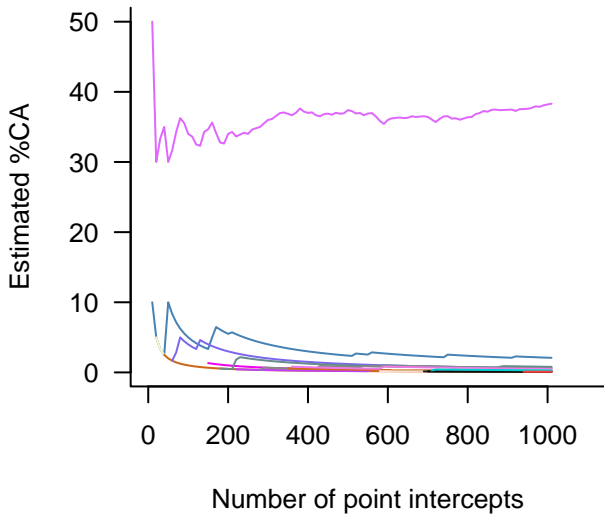

### QDASSD0002-53757

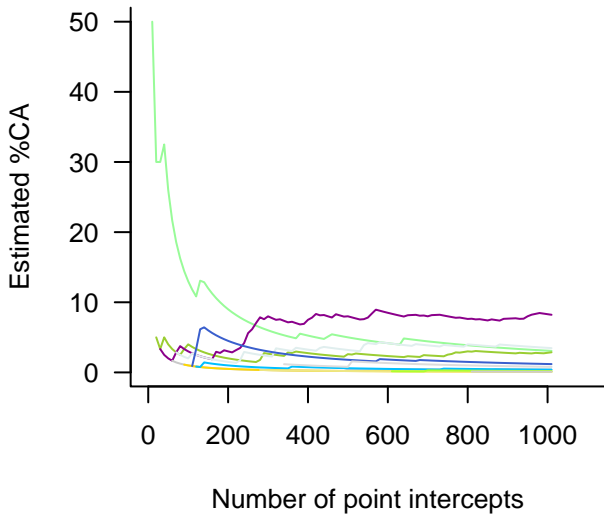

### QDASSD0002-57622

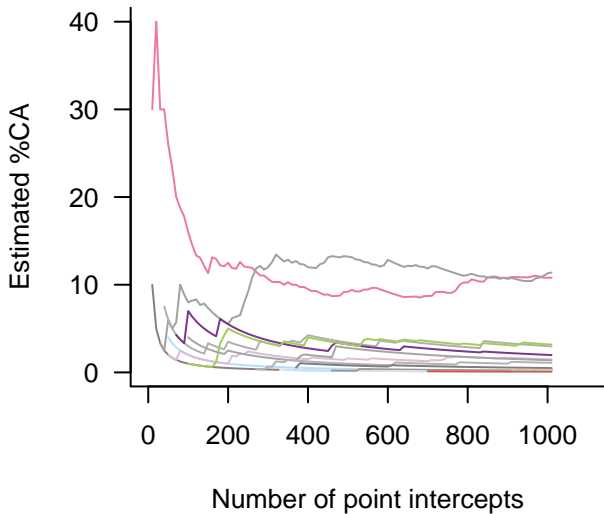

### QDASSD0003-56912

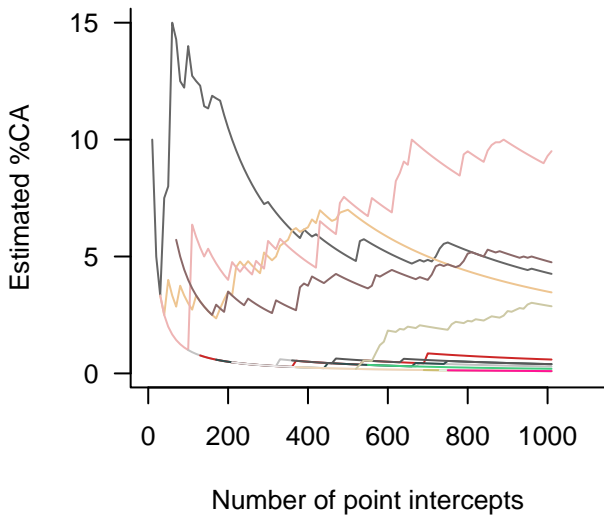

### QDASSD0003-57623

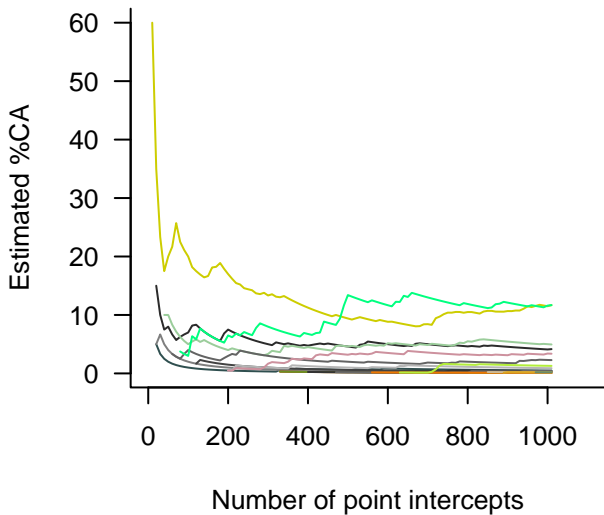

### QDASSD0004-56913

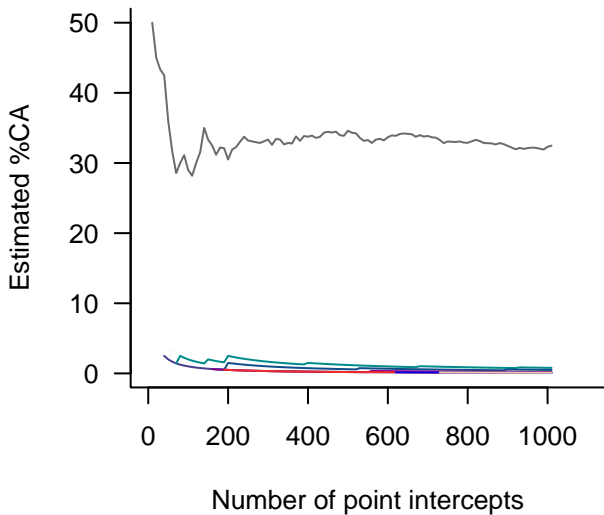

### QDASSD0004-57624

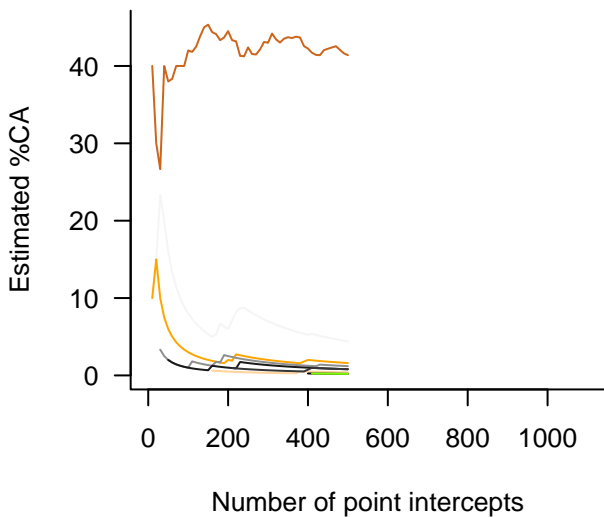

- *Triodia basedowii*
- *Tribulus eichlerianus*
- *Aristida holathera*
- *Sclerolaena sp.*
- *Fimbristylis dichotoma*

### QDASSD0005-56914

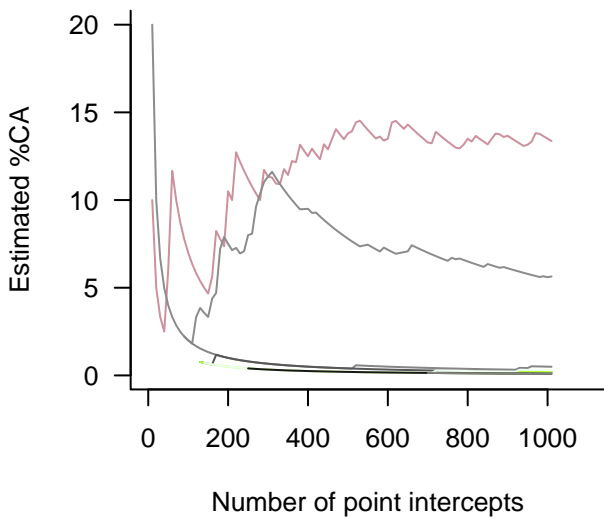

- *Acacia georginae*
- *Dissocarpus paradoxus*
- *Eremophila latrobei subsp. glabr*
- *Eremophila obovata subsp. obov*
- *Fimbristylis sp.*

### QDASSD0005-57625

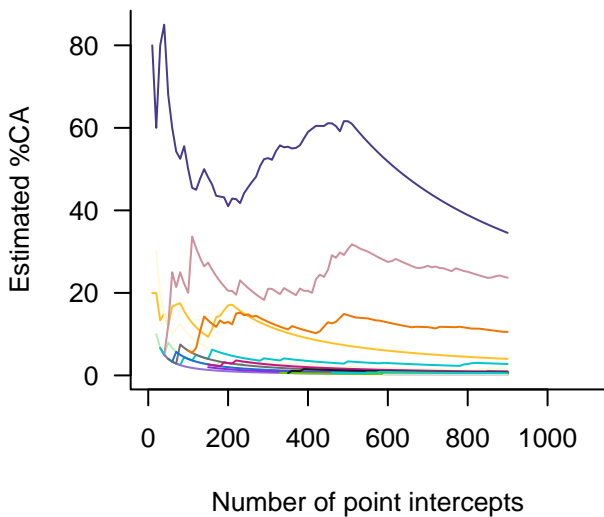

- *Triodia basedowii*
- *Acacia georginae*
- *Dissocarpus paradoxus*
- *Tribulus eichlerianus*
- *Tribulopsis angustifolia*

### QDASSD0006-56915

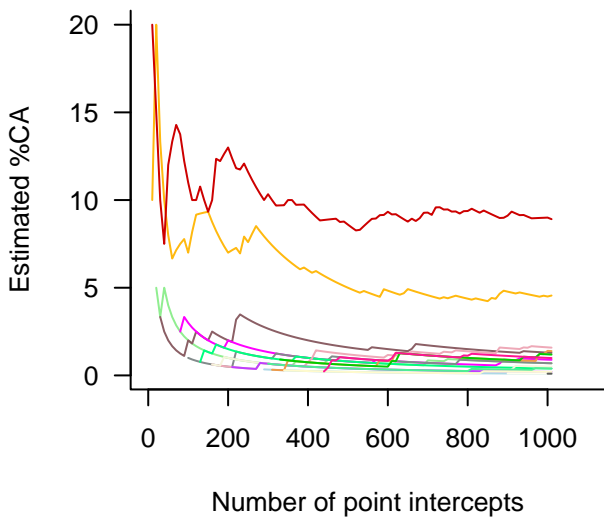

- *Triodia basedowii*
- *Aristida holathera* var. *holathera*
- *Sida fibulifera*
- *Acacia ligulata*
- *Acacia murrayana*

### QDASSD0006-57626

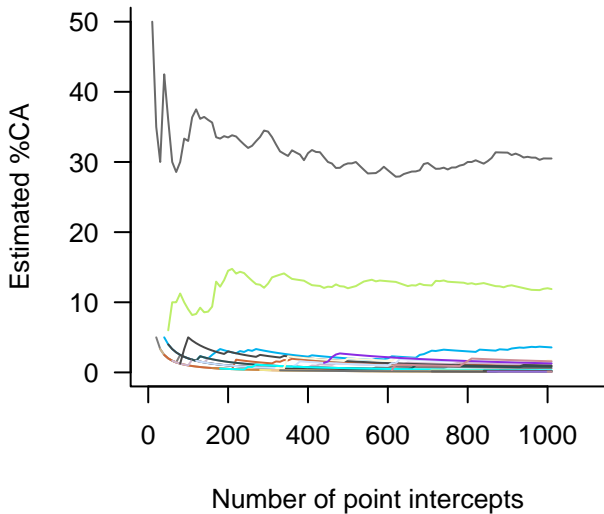

### QDASSD0007-56916

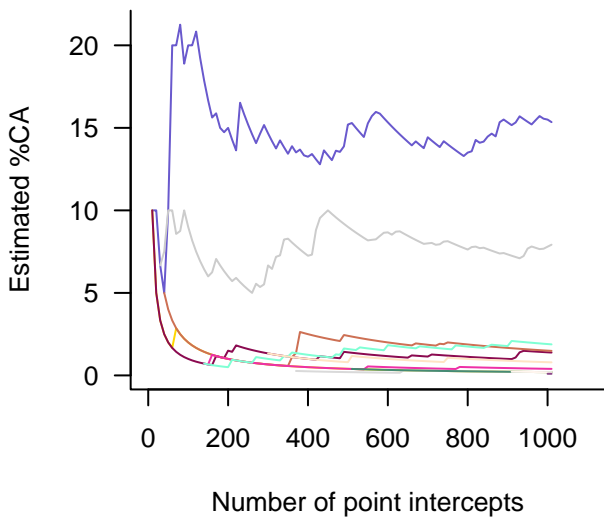

### QDASSD0007-57627

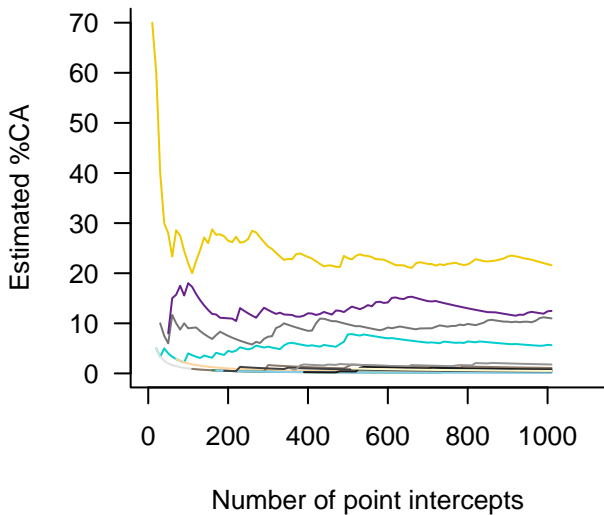

### QDASSD0008-56917

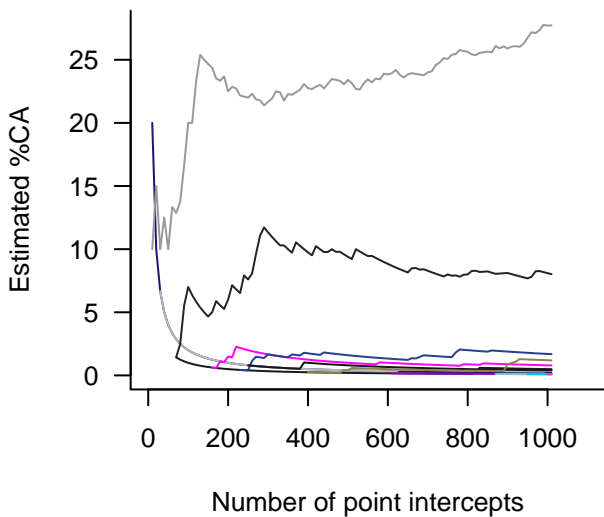



### QDASSD0008-57628

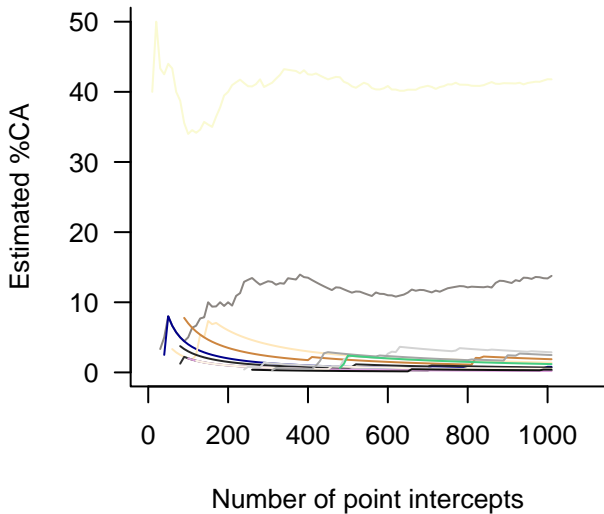

- Triodia basedowii*
- Grevillea stenobotrya*
- Petalostylis cassioides*
- Halgania cyanea*
- Acacia dictyophleba*

### QDASSD0009-56918

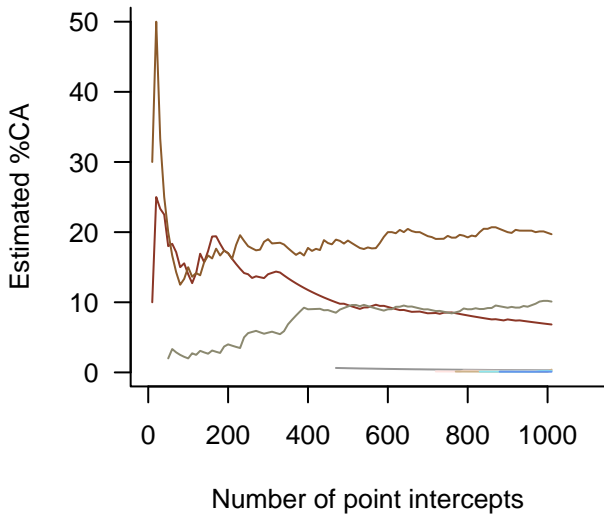

- Eucalyptus coolabah*
- Eulalia aurea*
- No id*
- Triodia basedowii*
- Eremophila longifolia*

### QDASSD0009-57629

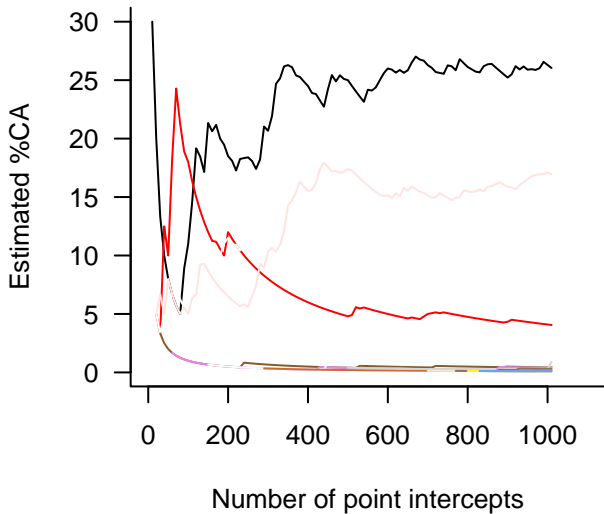

- Eucalyptus coolabah
- Eulalia aurea
- Rutidosia helichrysoides
- Bonamia media
- Triodia basedowii

### QDASSD0010-56919

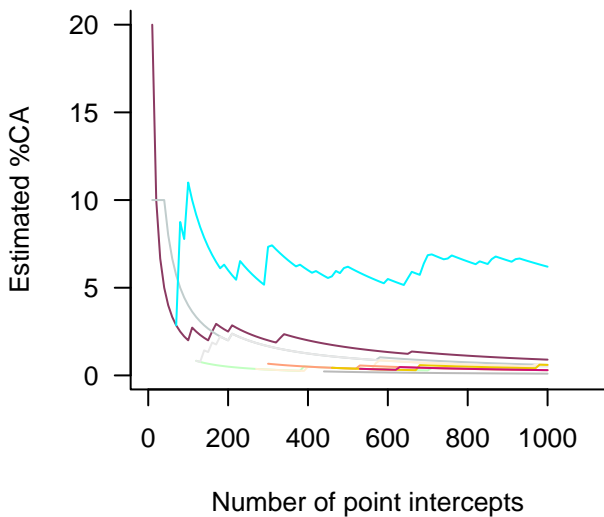

- Corymbia sp.
- Eulalia aurea
- Eremophila longifolia
- Ptilotus polystachyus
- Corymbia terminalis

### QDASSD0011-56920

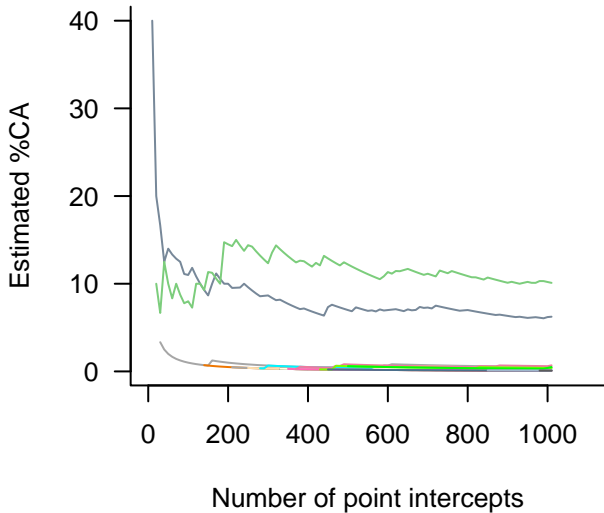

### QDASSD0011-57631

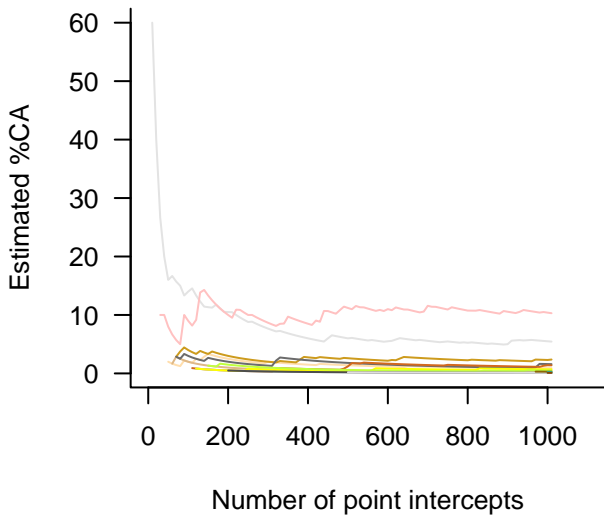

### QDASSD0012-56921

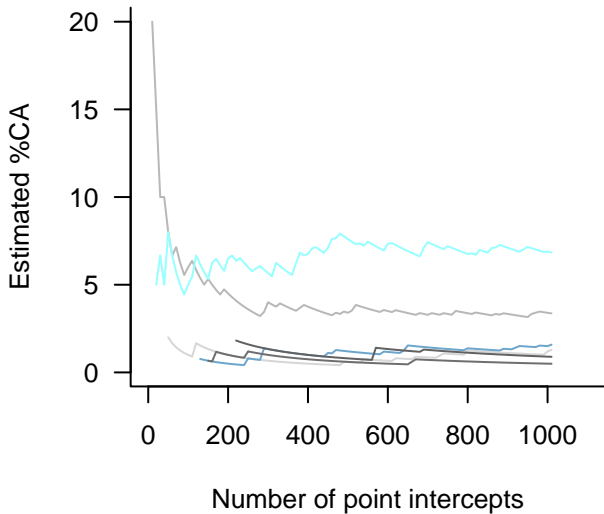

### QDASSD0012-57632

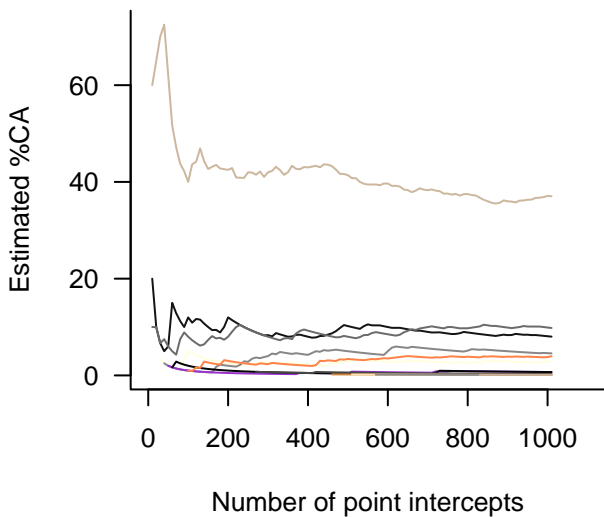

### QDASSD0013-56922

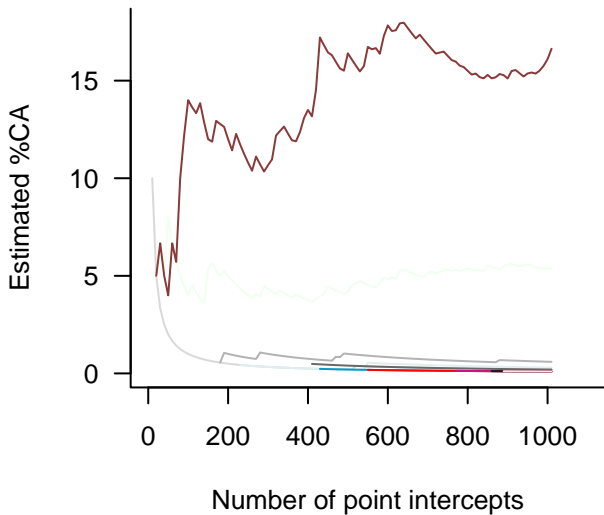

- *Acacia sibirica*
- *Aristida holathera* var. *holathera*
- *Eremophila latrobei* subsp. *glabr*
- *Paspalidium rarum*
- *Senna artemisioides* subsp. *alici*

### QDASSD0013-57633

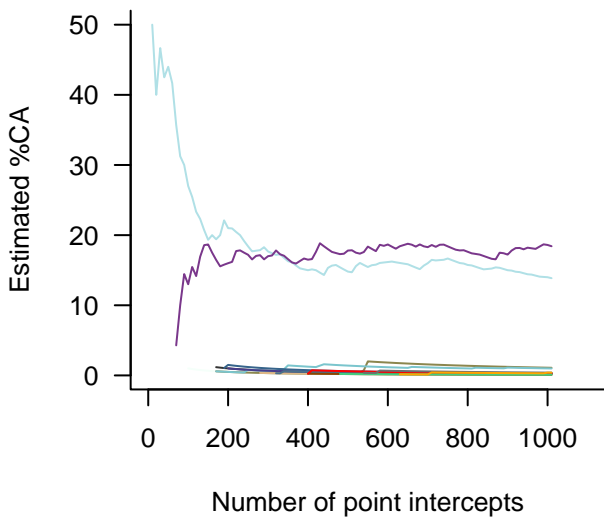

- *Acacia sibirica*
- *Aristida holathera*
- *Fimbristylis dichotoma*
- *Cleome viscosa*

### QDASSD0014-56923

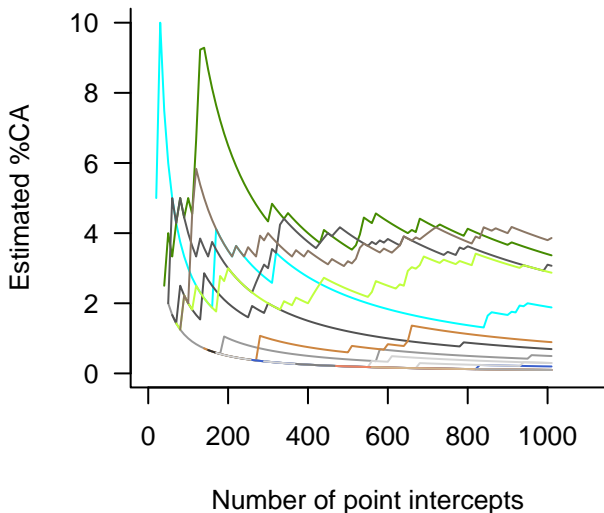

- Aristida holathera* var. *holathera*
- Dactyloctenium radulans*
- Fimbristylis dichotoma*
- Eremophila obovata* subsp. *obovata*
- Acacia georginae*

### QDASSD0014-57634

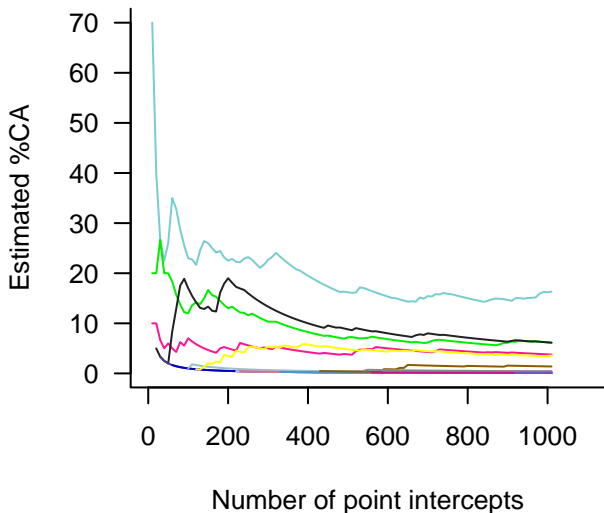

- Aristida holathera*
- Fimbristylis dichotoma*
- Dactyloctenium radulans*
- Eremophila obovata*

### QDASSD0015-56924

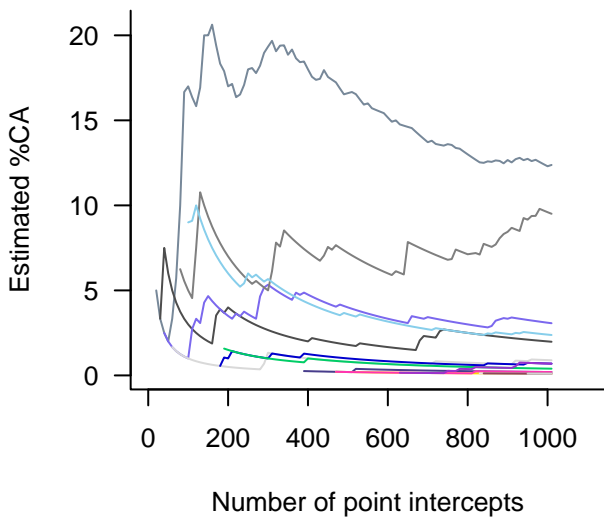

- Aristida holathera var. holathera
- Acacia sibirica
- Fimbristylis dichotoma
- Dactyloctenium radulans
- Sclerolaena diacantha

### QDASSD0015-57635

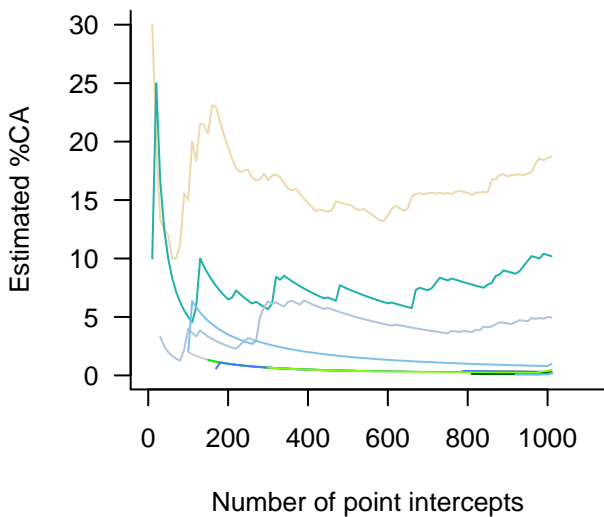

- Aristida holathera
- Acacia sibirica
- Fimbristylis dichotoma
- Cenchrus ciliaris
- Cleome viscosa

### SAAEYB0001-57637

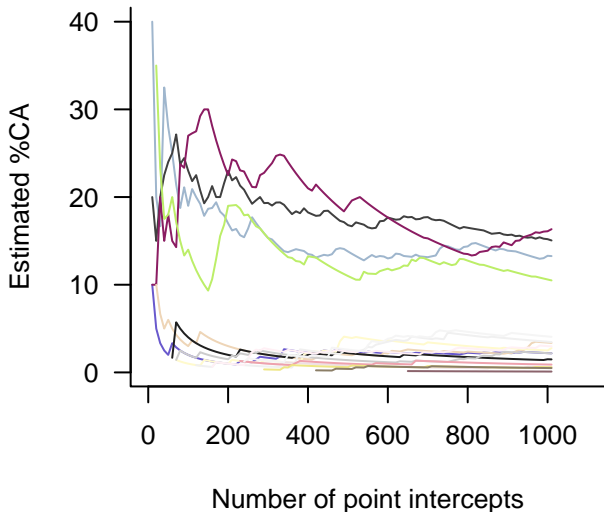

- Atriplex paludosa* subsp. *cordata*
- Carrichtera annua*
- Mesembryanthemum crystallinum*
- Lycium ferocissimum*
- rhagodia candolleana* subsp. *ca*

### SAAFLB0030-53506

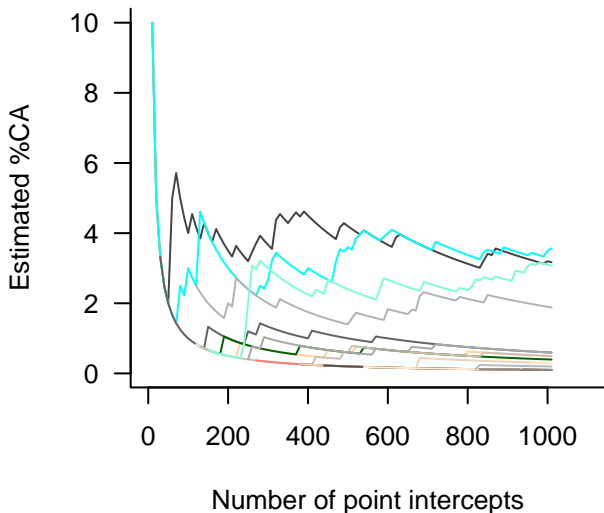

- Maireana astrotricha*
- Enneapogon cylindricus*
- Sclerolaena constricta*
- Atriplex vesicaria*
- Salsola australis*



### SA AFLB0031-53507

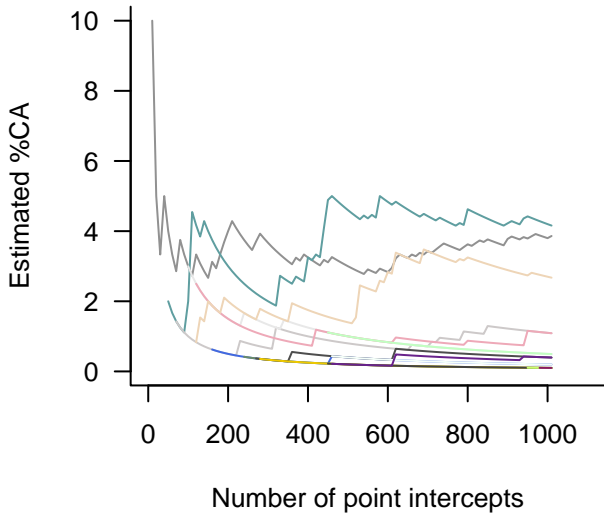

### SA AGAW0001-56992

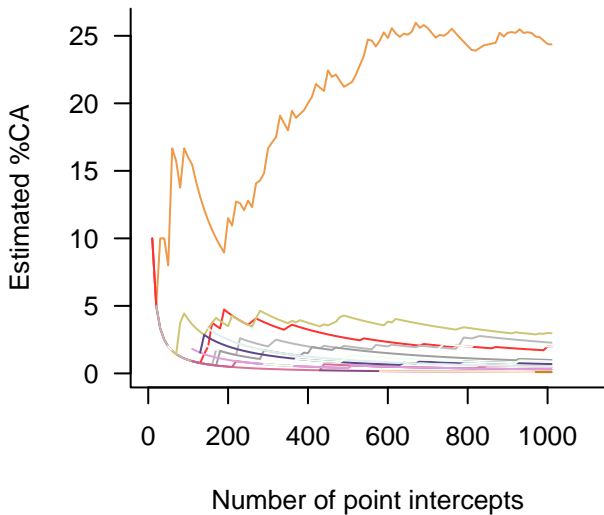

### SAAGAW0002-56993

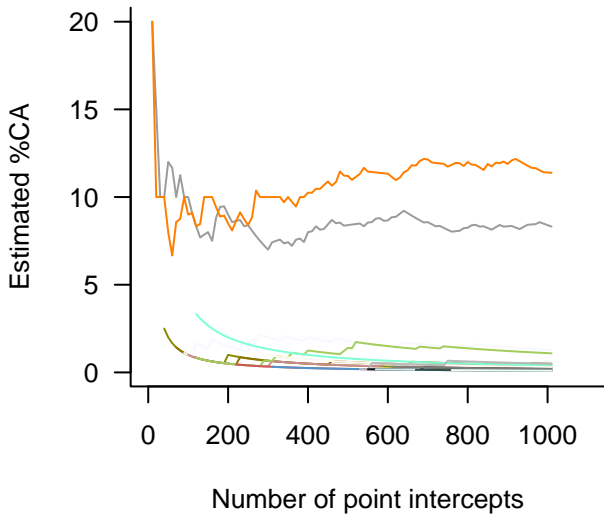

- Atriplex vesicaria*
- Maireana sedifolia*
- Maireana sp.*
- Carrichtera annua*
- Sclerolaena obliquicuspis*

### SAAGAW0003-56994

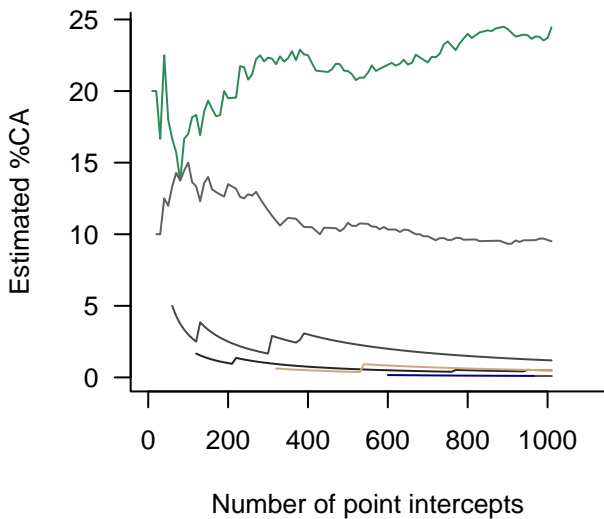

- Casuarina pauper*
- Maireana sedifolia*
- Acacia papyrocarpa*
- Atriplex vesicaria*
- Alectryon oleifolius subsp. canescens*

### SAAGVD0001-56925

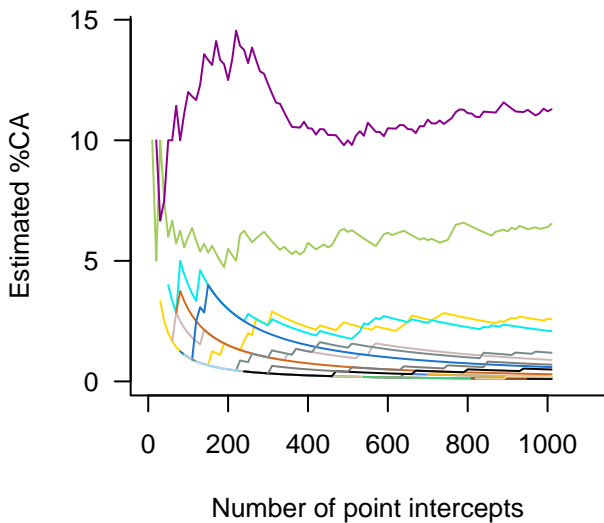

- Salsola australis*
- Enneapogon cylindricus*
- Trichanthodium skirrophorum*
- Enneapogon avenaceus*
- Sclerolaena patenticuspis*

### SAAGVD0002-56926

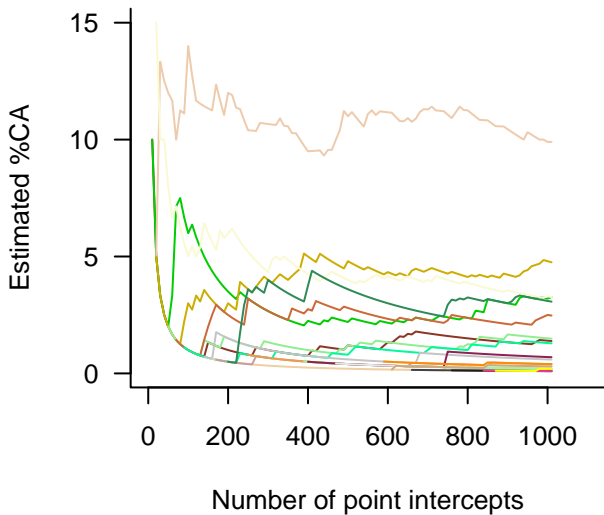

- Enneapogon cylindricus*
- Salsola australis*
- Aristida contorta*
- Trichanthodium skirrophorum*
- Enneapogon avenaceus*

### SAAGVD0003-56927

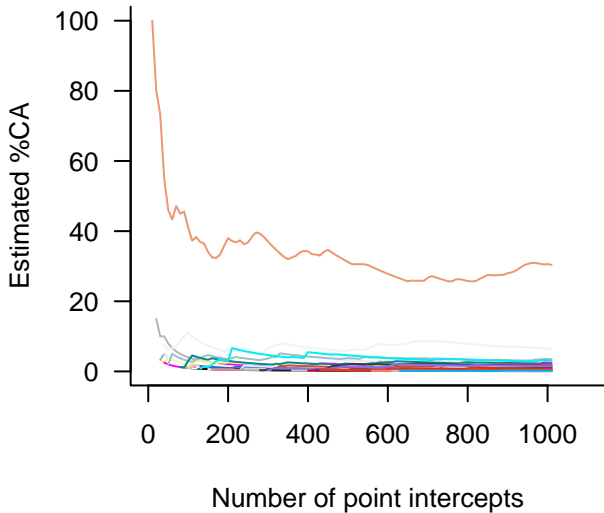

### SAAGVD0004-56947

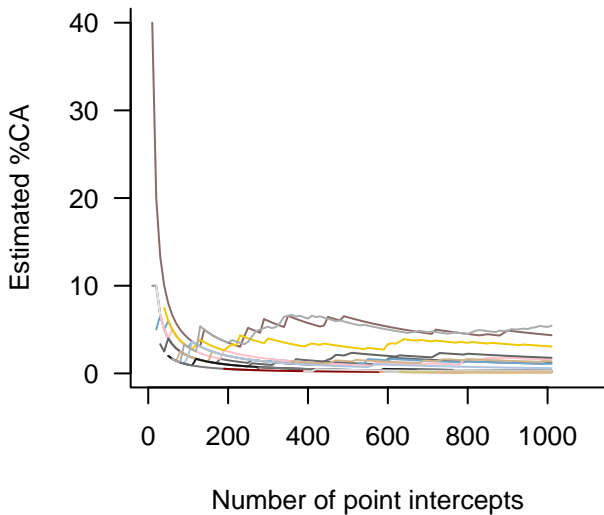

### SAAMDD0007-53742

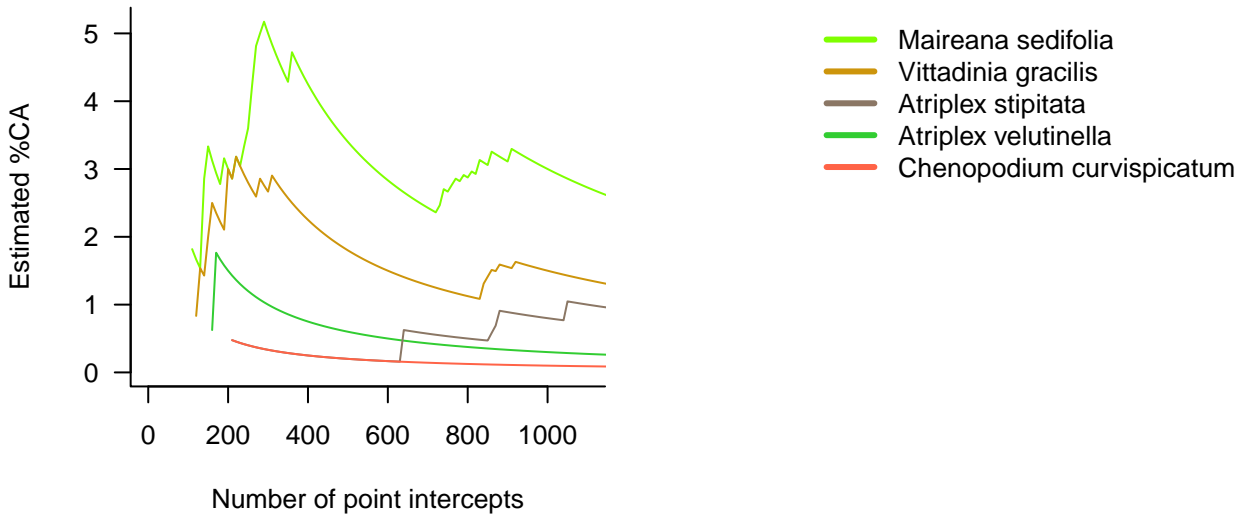

### SAAMDD0008-53743

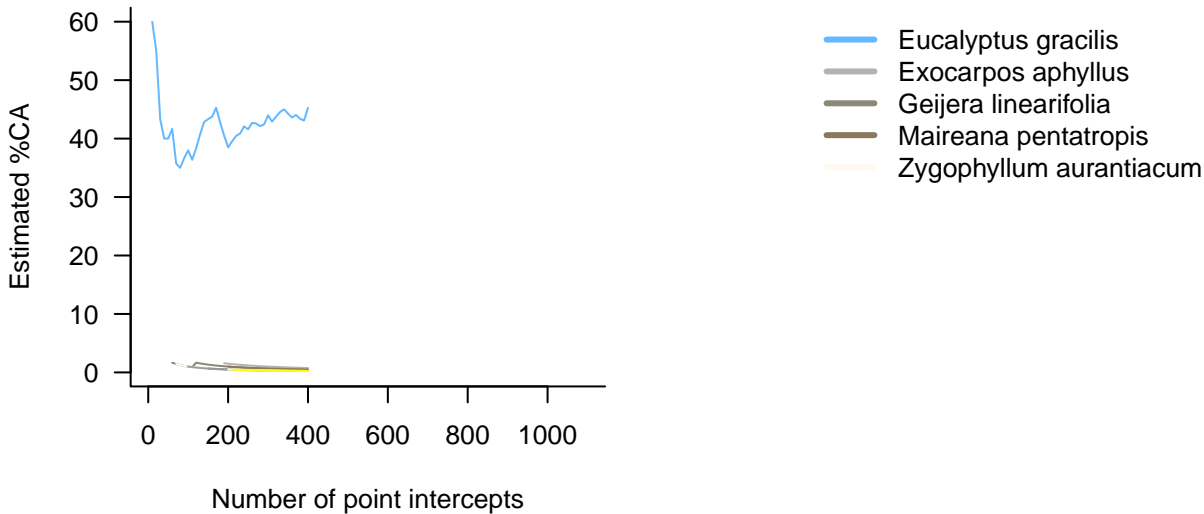

### SAAMDD0009-53744

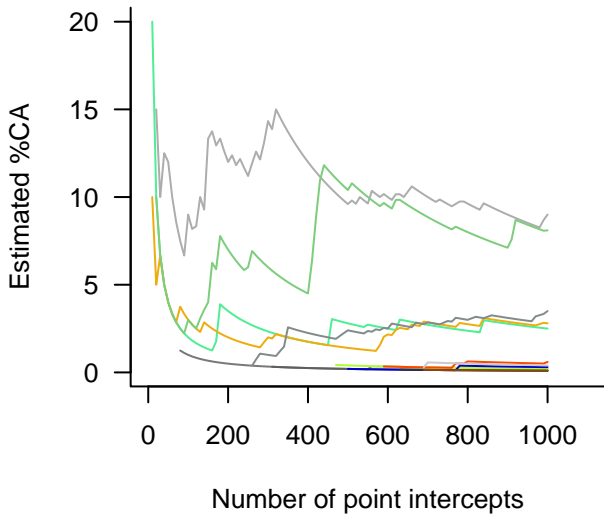

- Myoporum platycarpum
- Eucalyptus porosa
- Austrostipa nullanulla
- Atriplex stipitata
- Enchylaena tomentosa

### SAAMDD0010-53700

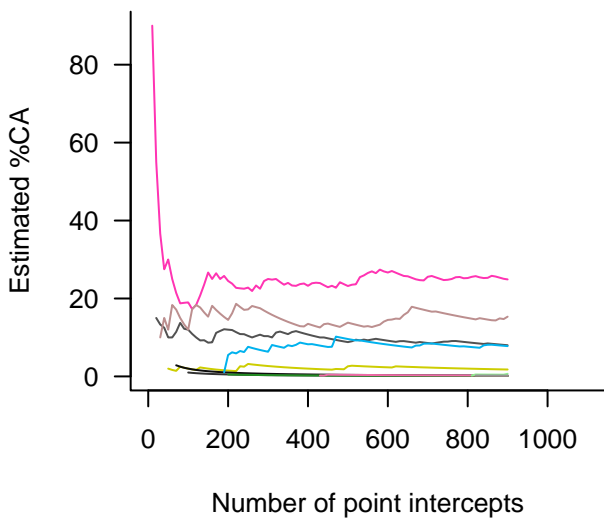

- Eucalyptus socialis
- Eucalyptus leptophylla
- Triodia irritans
- Melaleuca lanceolata
- Myoporum platycarpum

### SAAMDD0011-53745

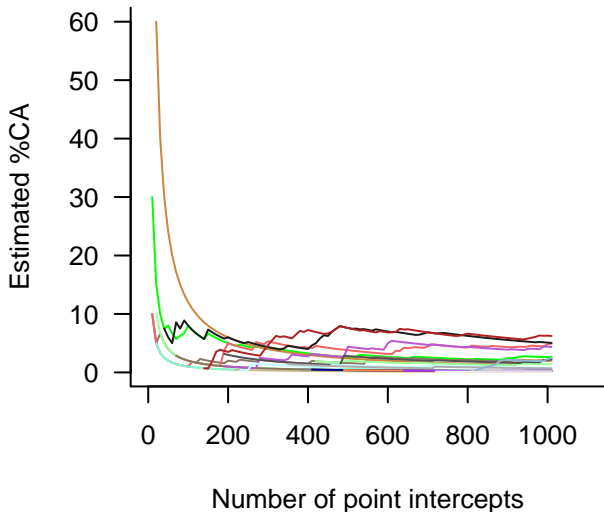

- Senna artemisioides* subsp. x cc
- Senna artemisioides* subsp. x pe
- Enchylaena tomentosa*
- Myoporum platycarpum*
- Atriplex stipitata*

### SAANUL0001-56948

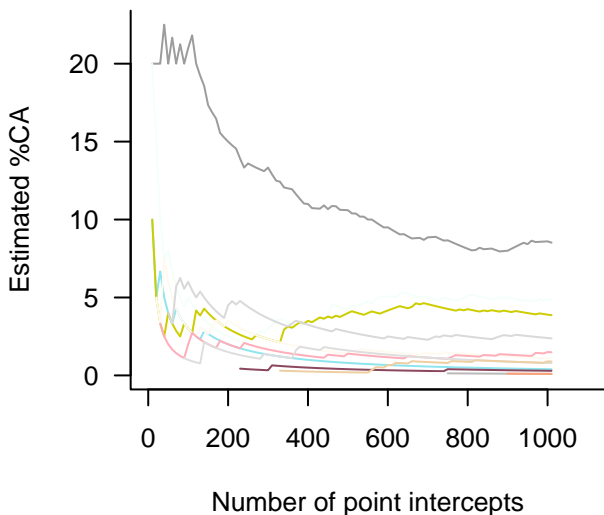

- Atriplex vesicaria*
- Austrostipa nitida*
- Salsola australis*
- Zygophyllum ovatum*
- Rhodanthe floribunda*

### SAANUL0002-56949

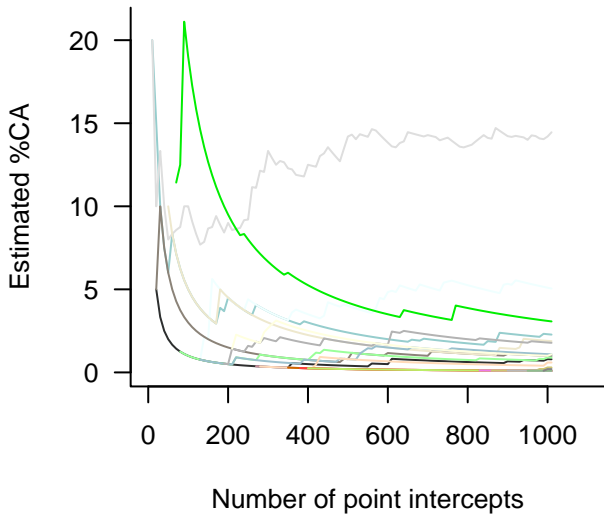

### SAANUL0003-56950

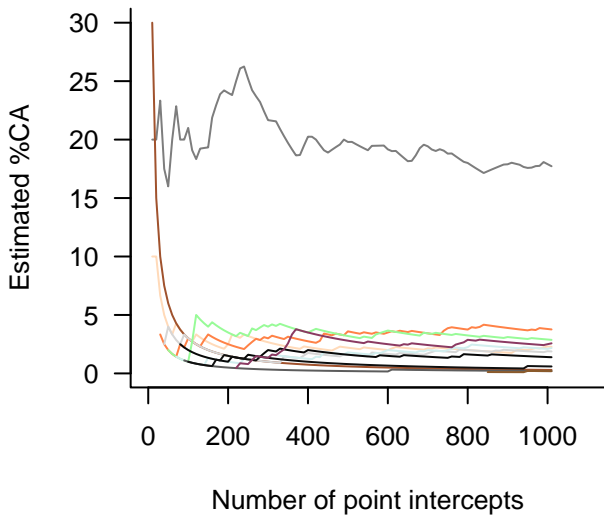



### SAANUL0004-56951

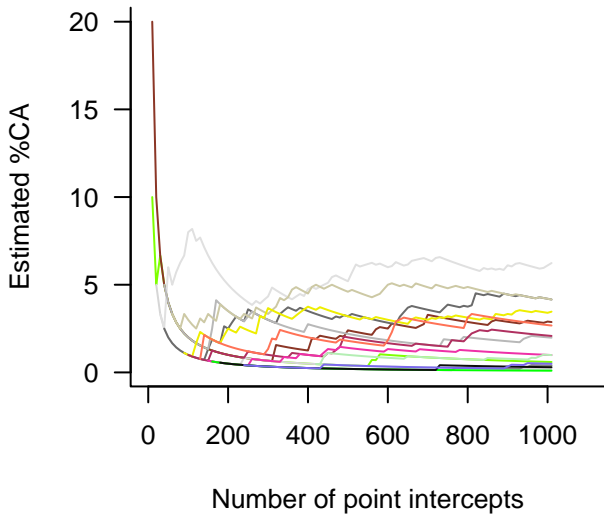

- Maireana oppositifolia*
- Senecio spanomerus*
- Rytidosperma caespitosum*
- Tecticornia* sp.
- Disphyra crassifolium* subsp. cl.

### SAARIV0001-57090

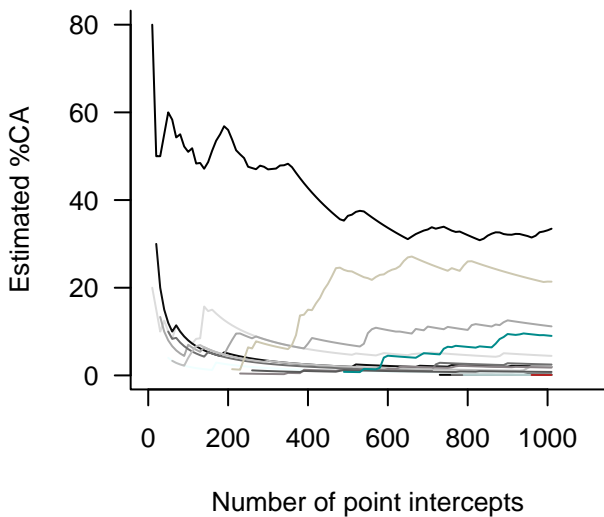

- Eucalyptus largiflorens*
- Eucalyptus camaldulensis* subsp.
- Acacia stenophylla*
- Chenopodium nitrariaceum*
- Enchylaena tomentosa* var. tomentosa

### SAARIV0002-57091

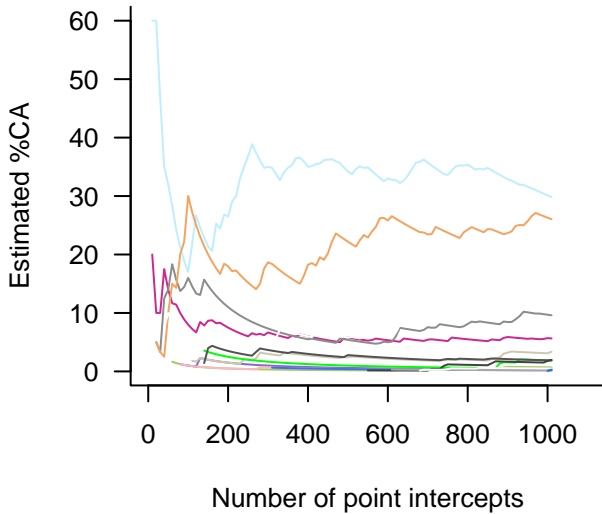

- Eucalyptus largiflorens*
- Acacia stenophylla*
- Chenopodium nitrariaceum*
- Eucalyptus camaldulensis* subsp. *camaldulensis*
- Disphyma crassifolium* subsp. *clavatum*

### SAARIV0003-57092

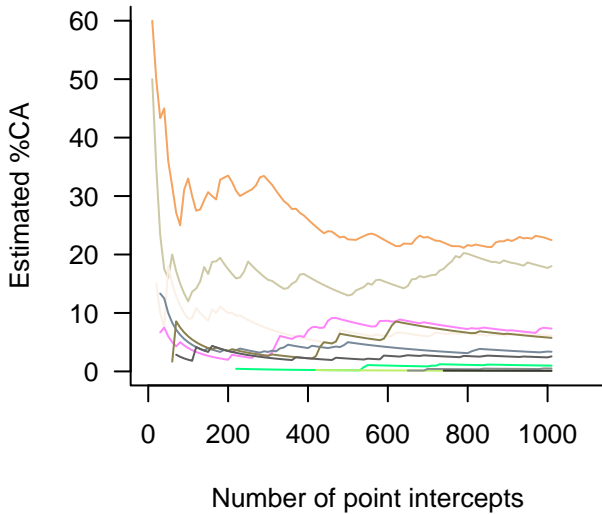

- Chenopodium nitrariaceum*
- Eucalyptus largiflorens*
- Duma florulenta*
- Acacia stenophylla*
- Eucalyptus camaldulensis* subsp. *camaldulensis*

### SAARIV0004-57093

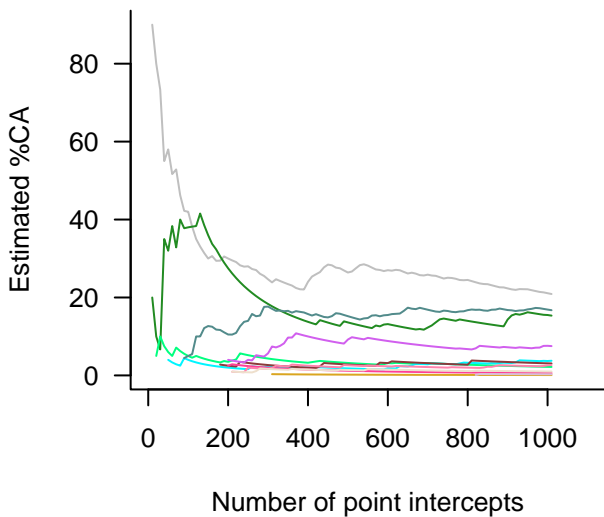

### SAARIV0005-57094

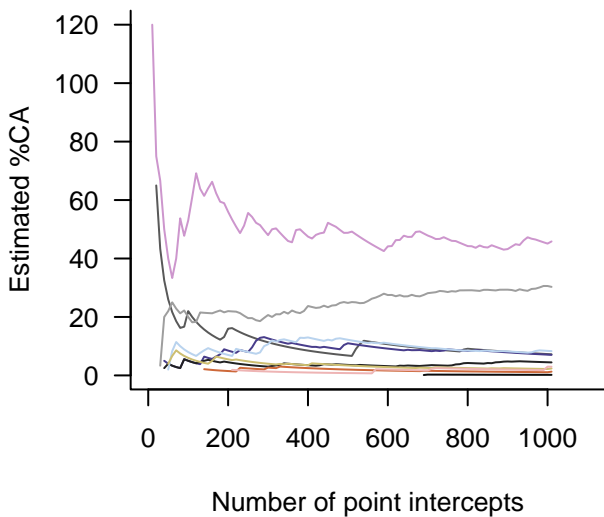

### SAARIV0006-57095

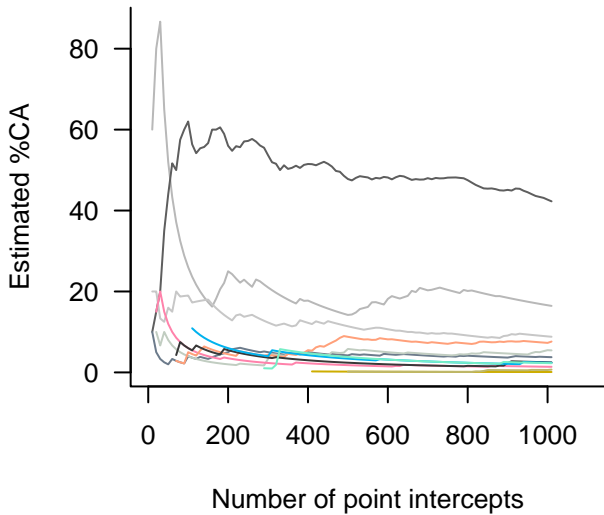

- *Senecio cunninghamii* var. *cunni*
- *Eucalyptus camaldulensis* subsp.
- *Einadia nutans*
- *Atriplex stipitata*
- *Myoporum parvifolium*

### SAARIV0007-57096

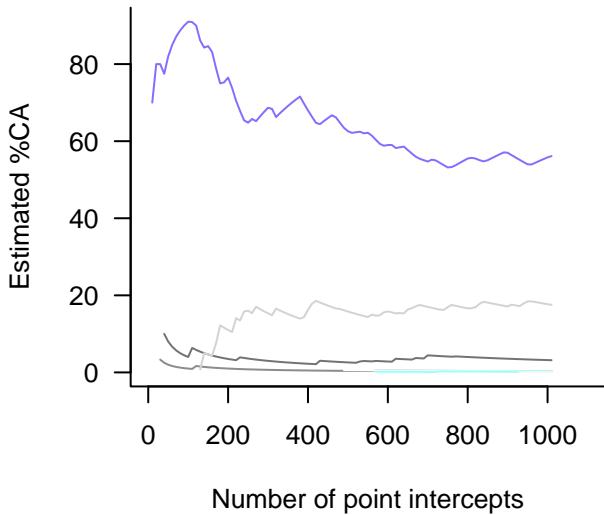

- *Duma florulenta*
- *Eucalyptus largiflorens*
- *Atriplex semibaccata*
- *Einadia nutans*
- *Atriplex* sp.

### SAARIV0008-57097

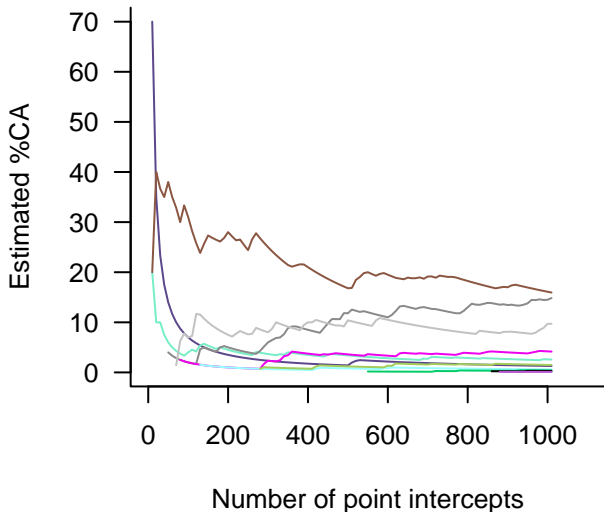

- Enchylaena tomentosa* var. *tomentosa*
- Duma florulenta*
- Eucalyptus largiflorens*
- Atriplex stipitata*
- Einadia nutans*

### SAARIV0009-57089

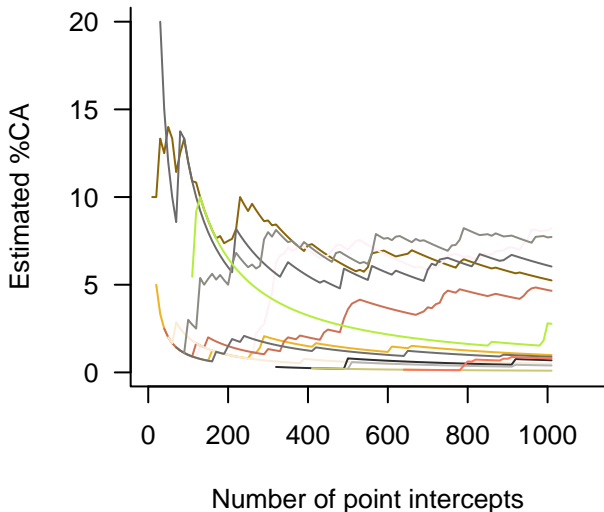

- Atriplex* sp.
- Duma florulenta*
- Eucalyptus largiflorens*
- Enchylaena tomentosa* var. *tomentosa*
- Einadia nutans*

### SAASTP0001-53719

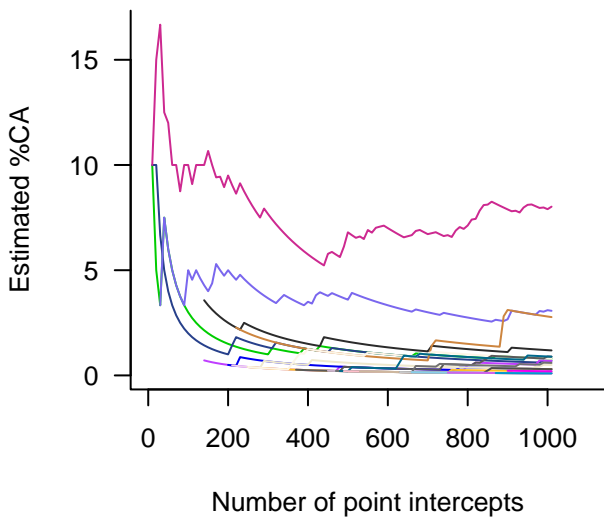

- Maireana aphylla
- Eragrostis setifolia
- Acacia aptaneura
- Acacia tetragonophylla
- Atriplex vesicaria

### SAASTP0002-53720

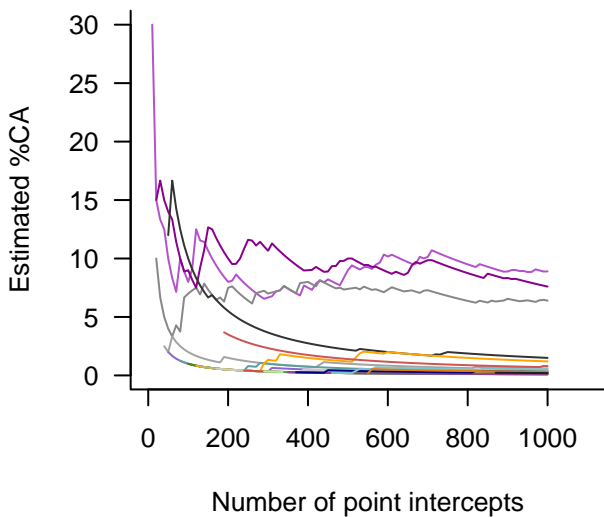

- Eriachne ovata
- Eragrostis setifolia
- Maireana aphylla
- Astrebla pectinata
- Chloris pectinata

### SAASTP0003-53721

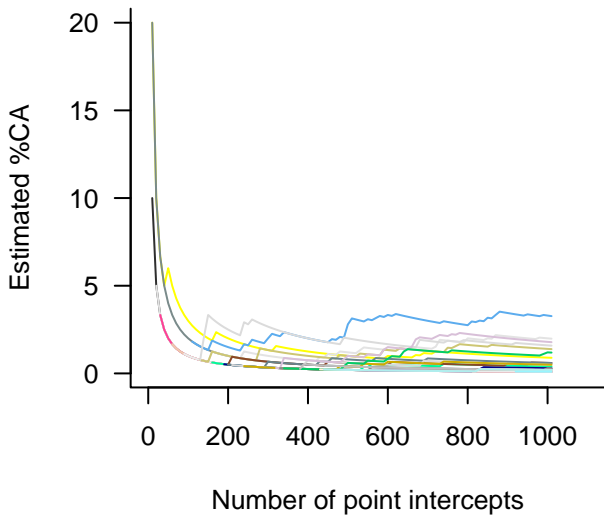

- Sclerolaena divaricata*
- Tripogon loliiformis*
- Aristida contorta*
- Sclerolaena intricata*
- Maireana aphylla*

### SAASTP0004-53722

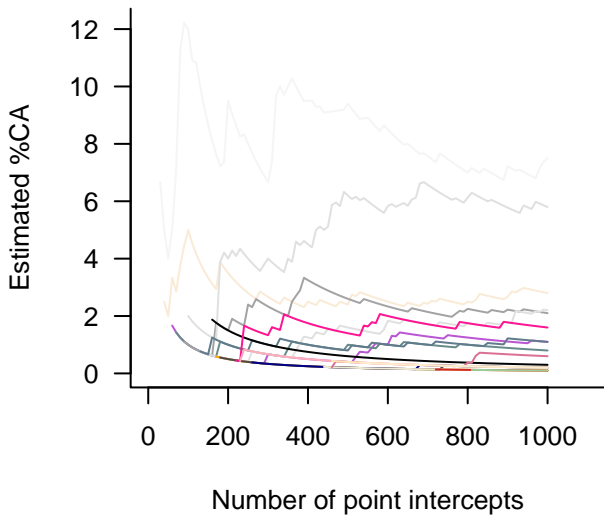

- Malvastrum americanum var. arr*
- Rutidosis helichrysoides subsp.*
- Sida fibulifera*
- Portulaca oleracea*
- Sclerolaena bicornis var. bicorni:*

### SAASTP0005-53723

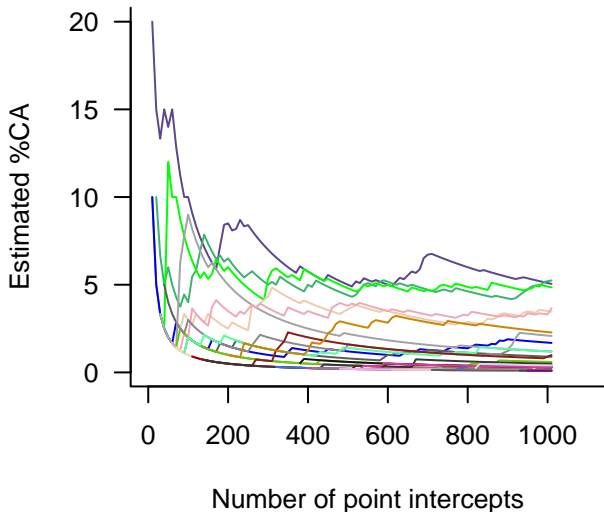

- Eragrostis tenellula*
- Swainsona oligophylla*
- Atriplex nummularia* subsp. *num*
- Sclerolaena bicornis* var. *bicornis*
- Portulaca intraterranea*

### SAASTP0007-53724

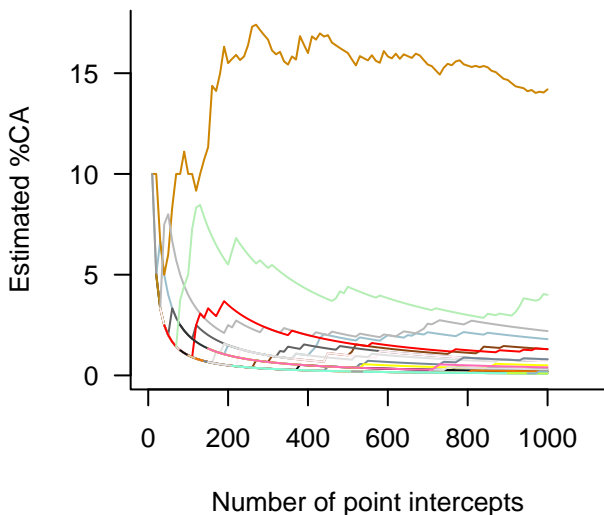

- Atriplex nummularia*
- Eragrostis falcata*
- Haloragis* sp.
- Teucrium racemosum*
- Maireana aphylla*



### SAASTP0008-53725

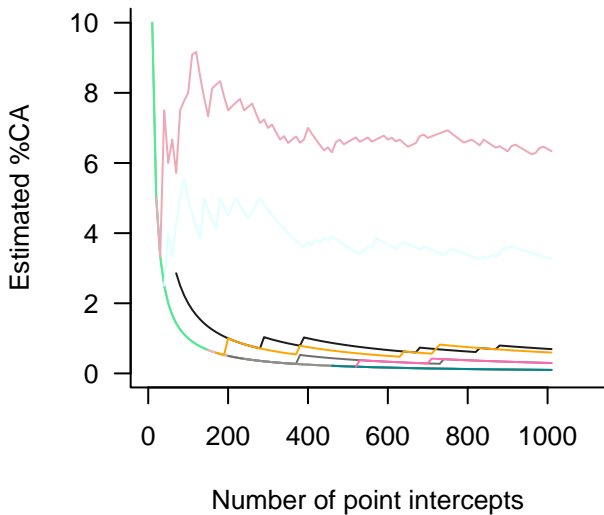

- Maireana astrotricha*
- Enneapogon cylindricus*
- Enneapogon avenaceus*
- Trianthema triquetra*
- Euphorbia drummondii*

### SAASTP0009-53726

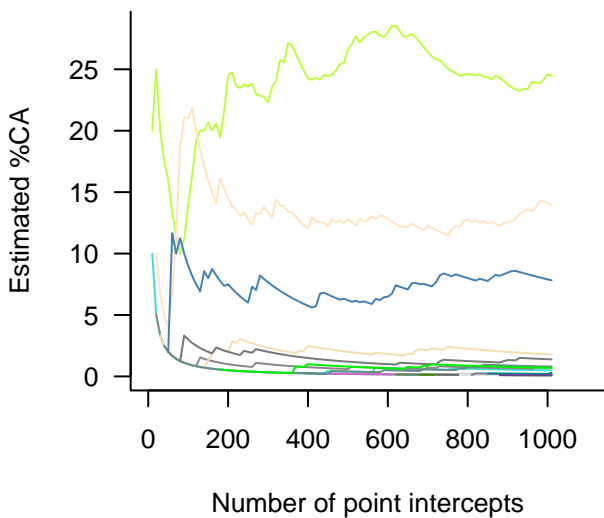

- Cullen australasicum*
- Atriplex nummularia* subsp. num
- Crotalaria smithiana*
- Frankenia* sp.
- Nicotiana velutina*

### SAASTP0010-53727

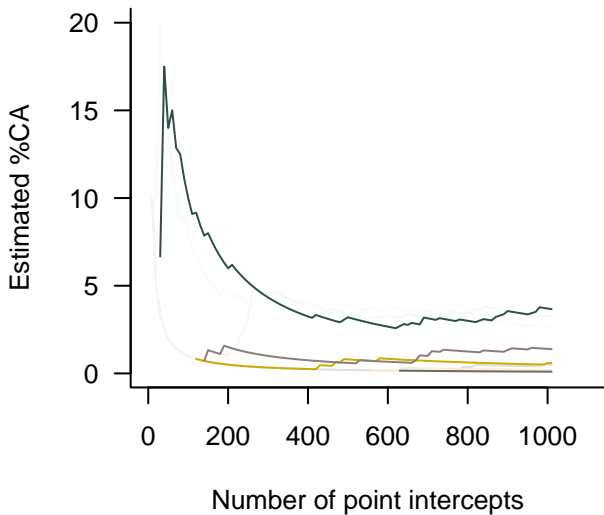

### SAASTP0011-53728

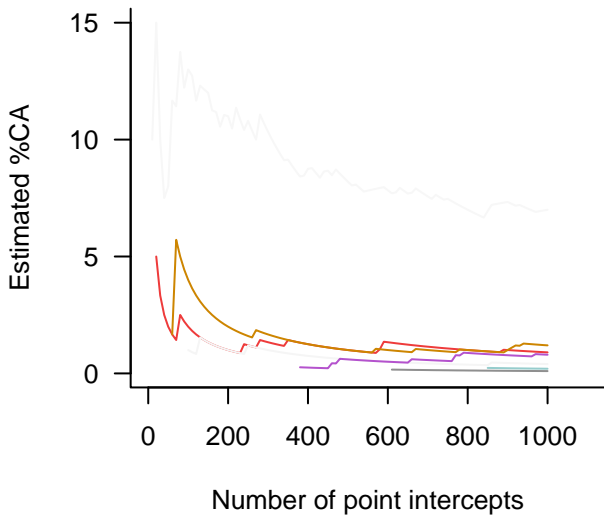

### SAASTP0012-53729

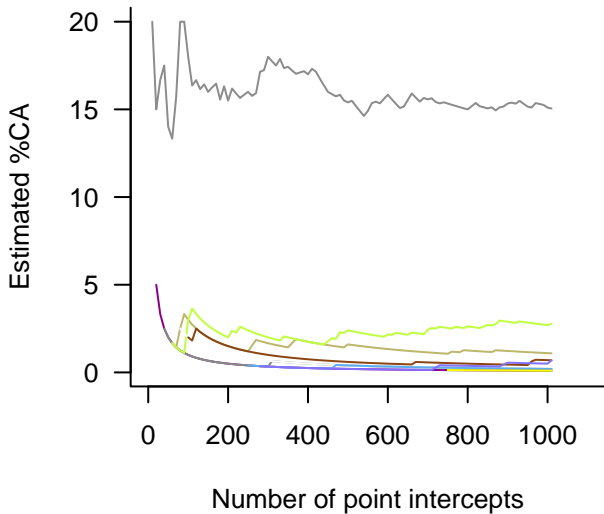

### SAASTP0013-53730

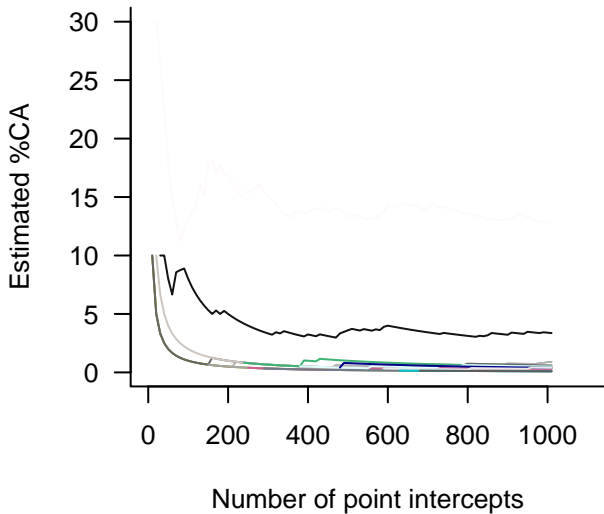

### SAASTP0014-57067

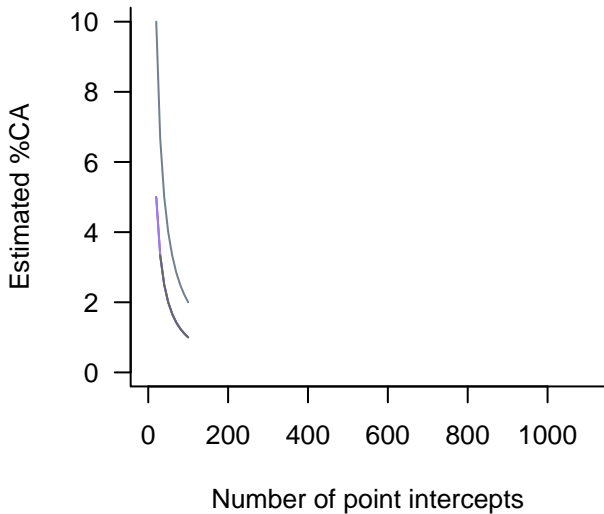

### SAASTP0015-53715

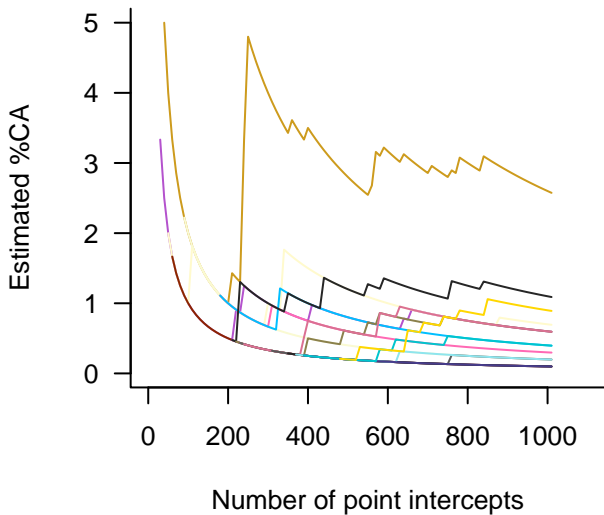

### SAASTP0016-53716

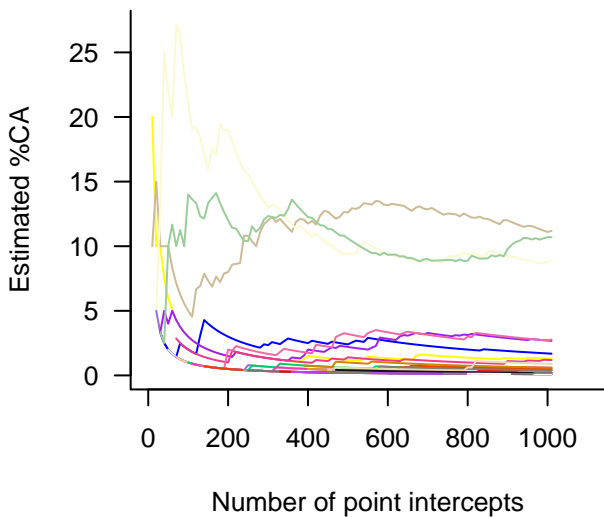

### SAASTP0017-53717

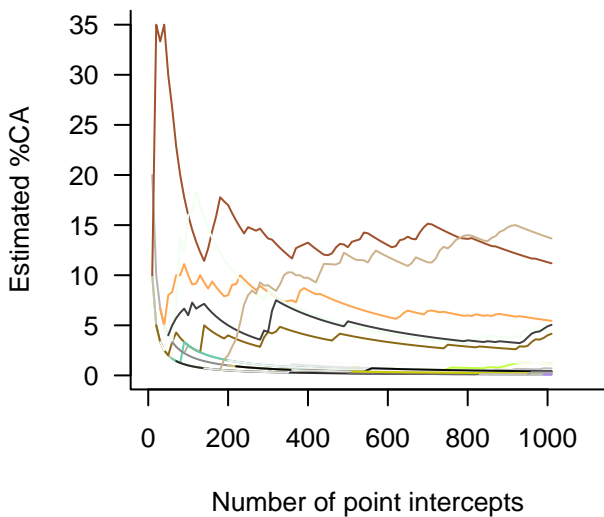

### SAASTP0018-53718

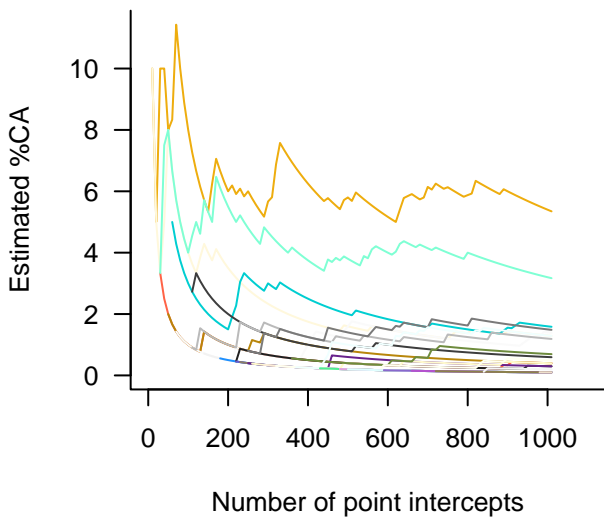

- Maireana aphylla*
- Eragrostis setifolia*
- Enneapogon avenaceus*
- Streptoglossa adscendens*
- Tripogon loliiformis*

### SAASTP0019-53731

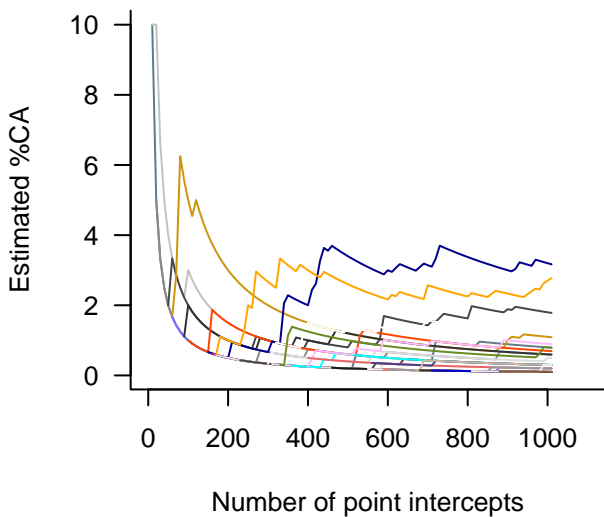

- Atriplex vesicaria*
- Astrebla pectinata*
- Enneapogon avenaceus*
- Maireana ciliata*
- Maireana aphylla*

### SAASTP0020-53732

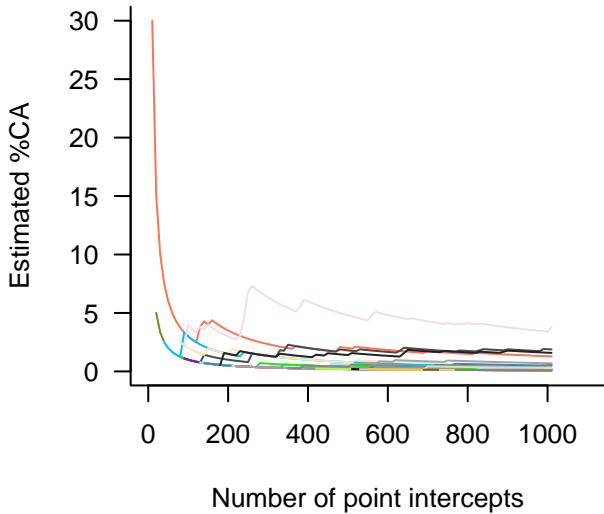

### SAASTP0021-53733

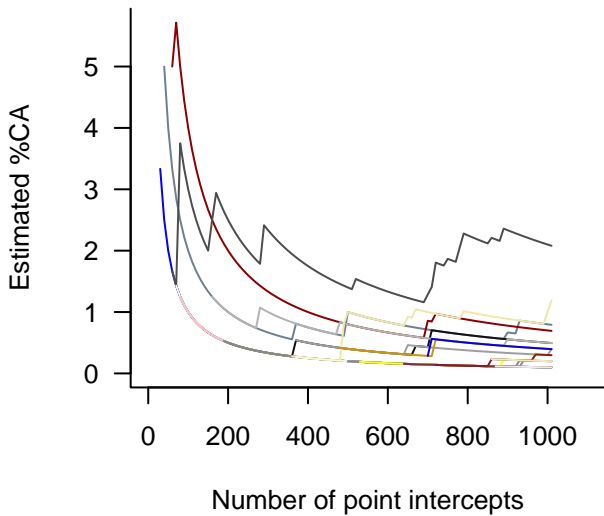

### SAASTP0022-53735

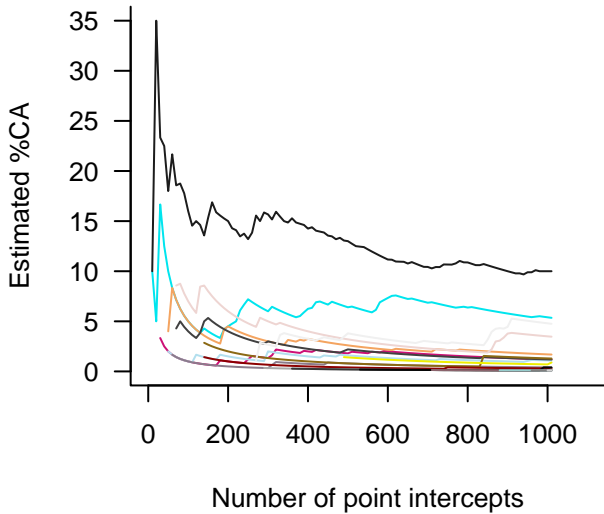

### SAASTP0023-53736

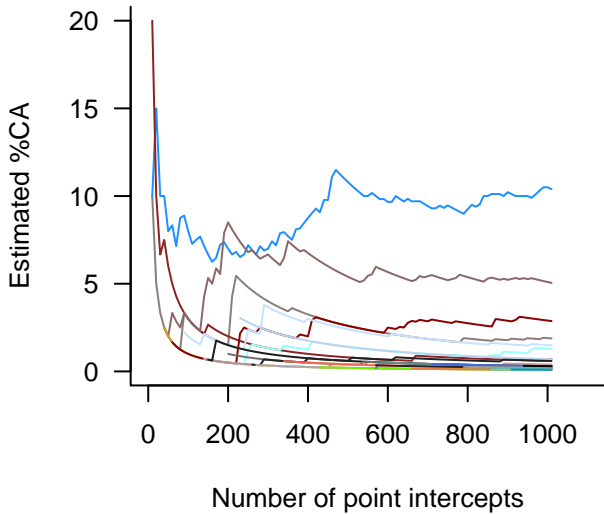



### SAASTP0024-53737

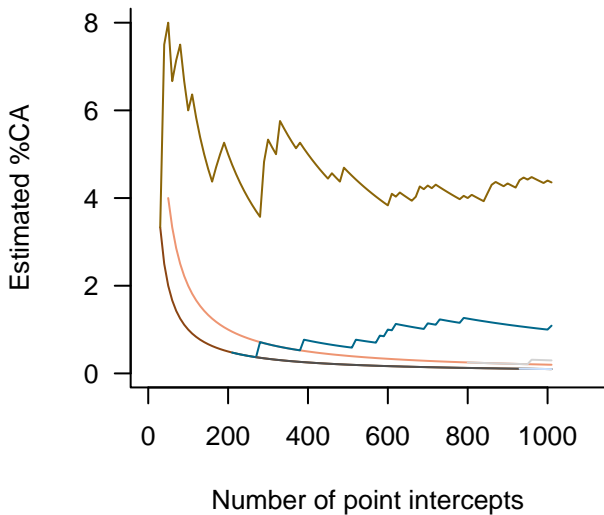

### SAASTP0025-53734

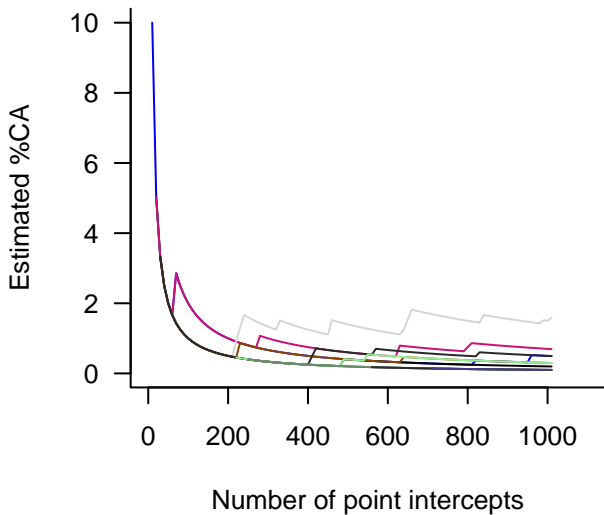

### SAASTP0026-53738

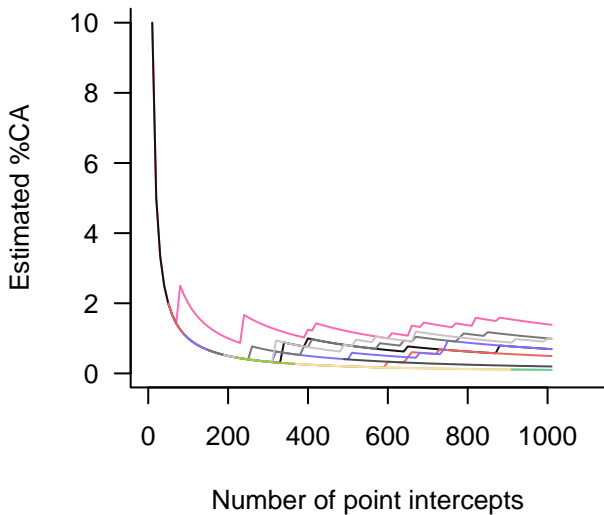

- Atriplex vesicaria*
- Sclerolaena intricata*
- Atriplex incrassata*
- Astrebla pectinata*
- Dissocarpus fontinalis*

### SAASTP0027-53739

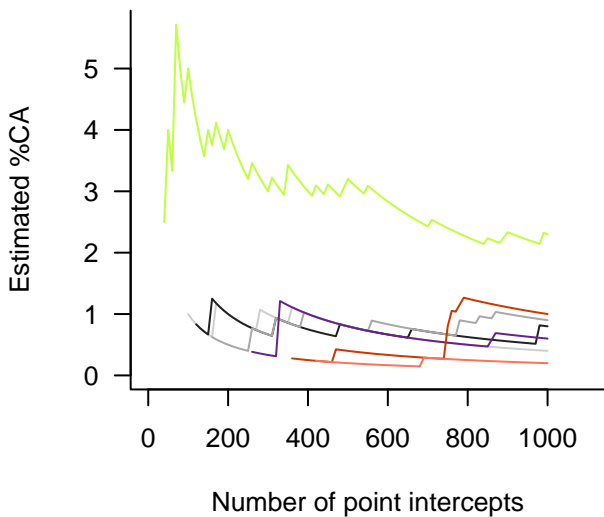

- Sclerolaena intricata*
- Dissocarpus fontinalis*
- Frankenia sp.*
- Atriplex vesicaria*
- Astrebla pectinata*

### SAASTP0028-53740

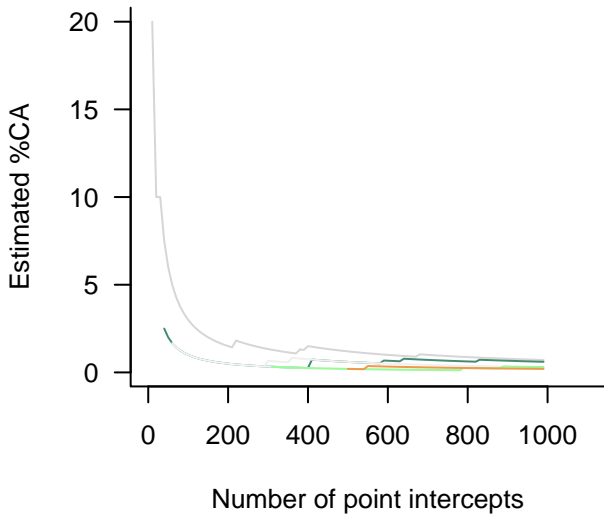

- Sclerolaena brachyptera
- Frankenia sp.
- Enneapogon polyphyllus
- Sclerolaena parallelicuspis
- Sclerolaena intricata

### SAASTP0029-53741

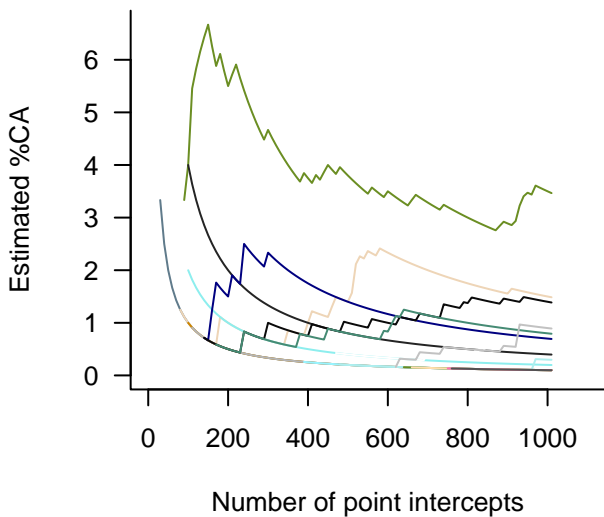

- Atriplex vesicaria
- Osteocarpum dipterocarpum
- Maireana astrotricha
- Eremophila duttonii
- Aristida contorta

### SAASTP0030-56935

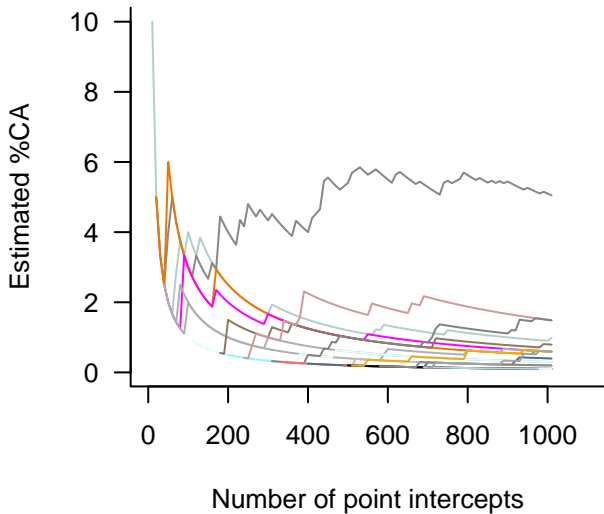

- *Aristida holathera* var. *holathera*
- *Acacia ligulata*
- *Enneapogon avenaceus*
- *Crotalaria eremaea* subsp. *erem*
- *Senna artemisioides* subsp. *x pe*

### SAASTP0031-56938

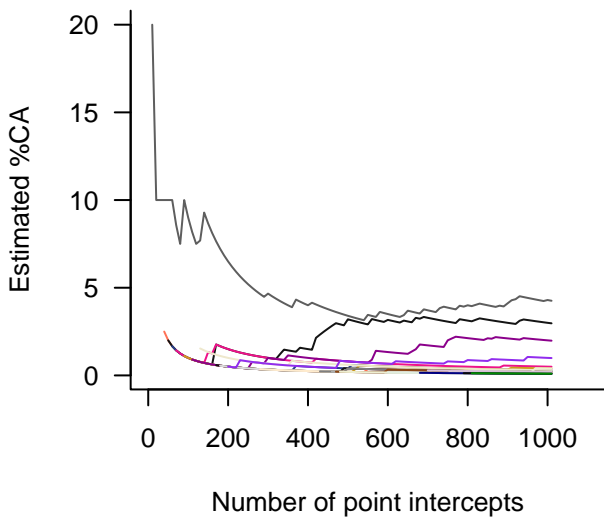

- *Zygochloa paradoxa*
- *Aristida holathera* var. *holathera*
- *Enneapogon polyphyllus*
- *Dodonaea viscosa* subsp. *angus*
- *Melhanhia oblongifolia*

### SAASTP0032-56939

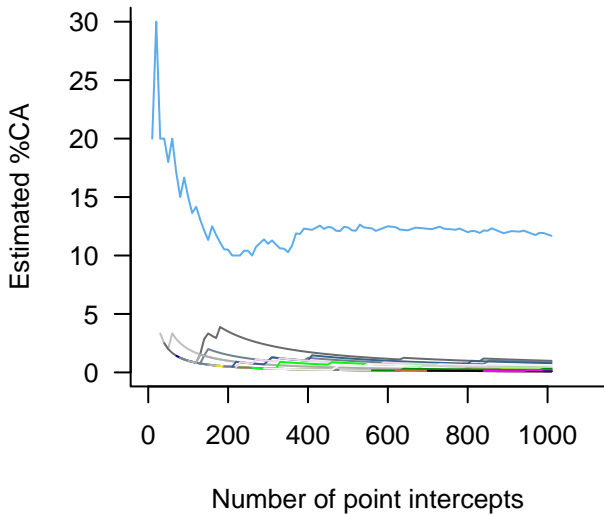

- Enneapogon avenaceus
- Astrebla sp.
- Sporobolus actinocladus
- Sclerolaena ventricosa
- Salsola australis

### SASMDD0001-53710

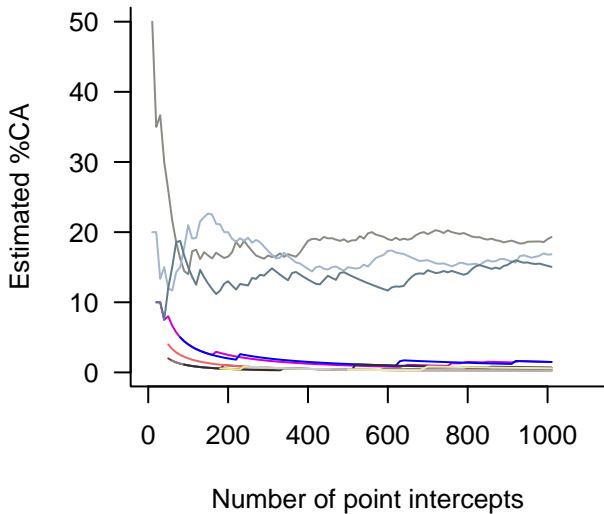

- Triodia scariosa
- Eucalyptus cyanophylla x eucaly
- Eucalyptus socialis subsp. socia
- Austrostipa sp.
- Dodonaea bursariifolia

### SASMDD0002-53711

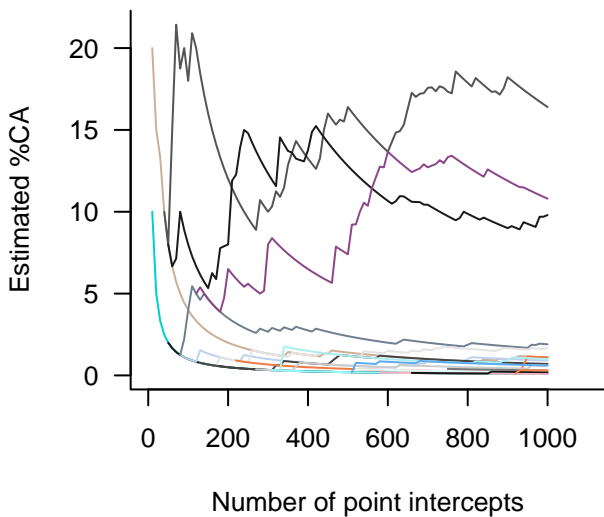

- *Eucalyptus oleosa*
- *Eucalyptus socialis* subsp. *socialis*
- *Eucalyptus dumosa*
- *Maireana pentatropis*
- *Austrostipa* sp.

### SASMDD0003-57009

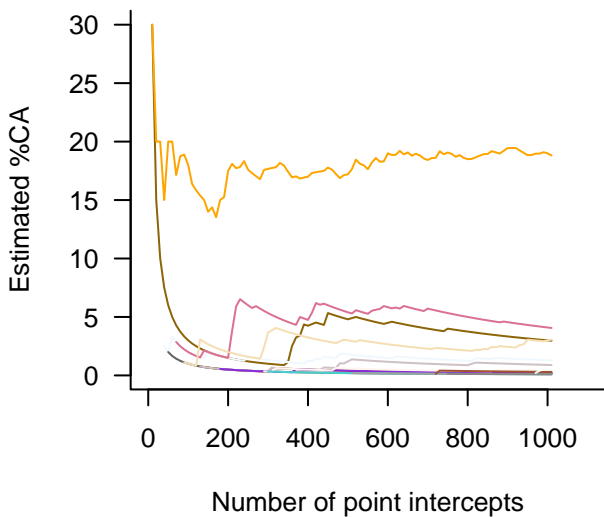

- *Austrostipa scabra* subsp. *scabra*
- *Eucalyptus oleosa* subsp. *oleosa*
- *Eucalyptus cyanophylla*
- *Eucalyptus gracilis*
- *Sclerolaena diacantha*

### SASMDD0004-56997

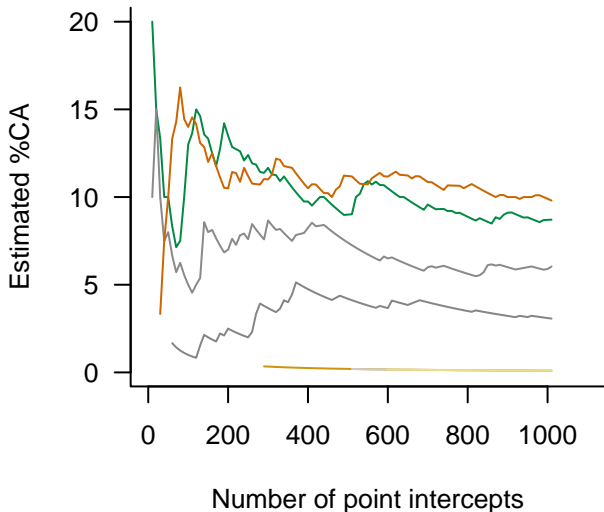

### SASMDD0004-57013

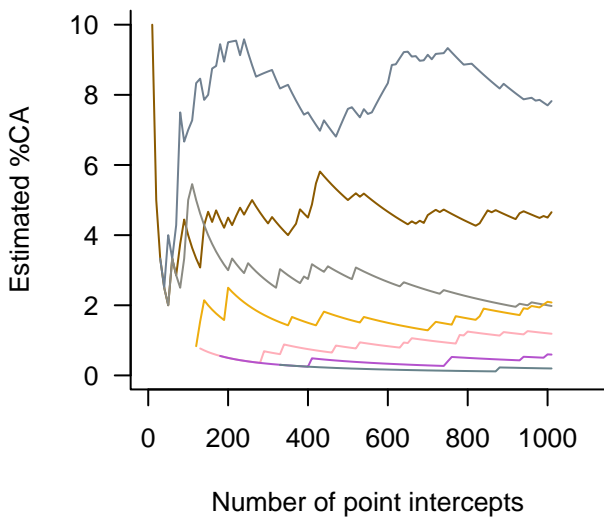

### SASMDD0005-53712

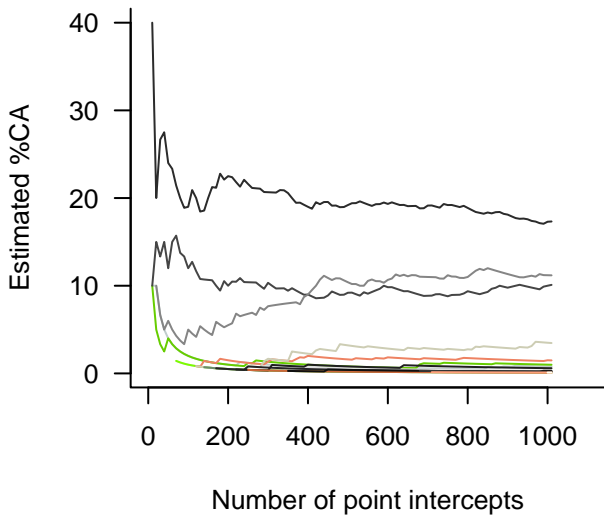

### SASMDD0005-57006

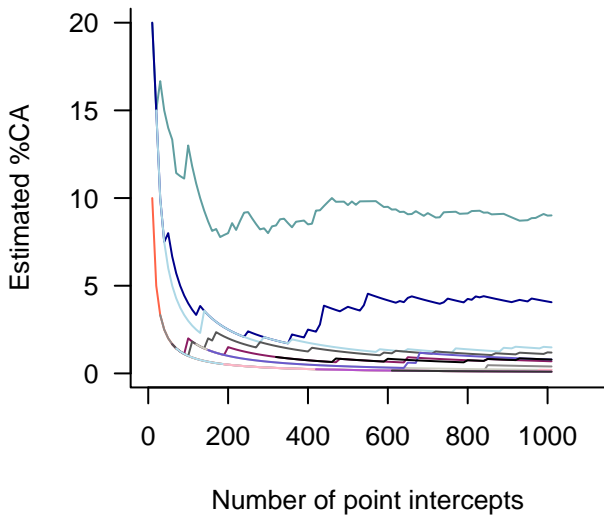



### SASMDD0006-53713

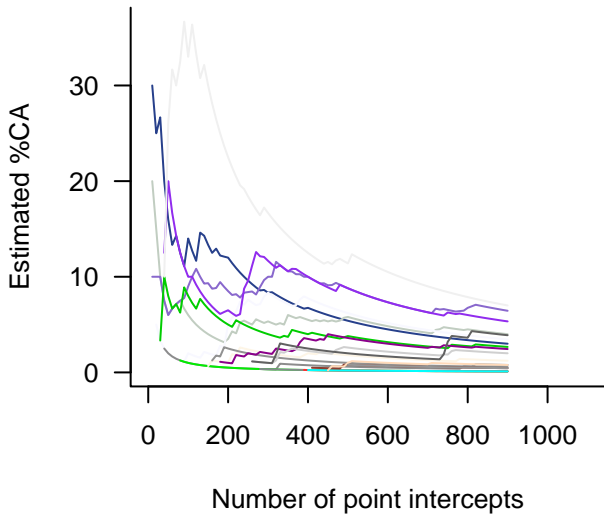

- Eucalyptus sp.
- Zygodphyllum aurantiacum subsp.
- Enchylaena tomentosa var. tomentosa
- Maireana pentatropis
- Eucalyptus oleosa subsp. oleosa

### SASMDD0006-57007

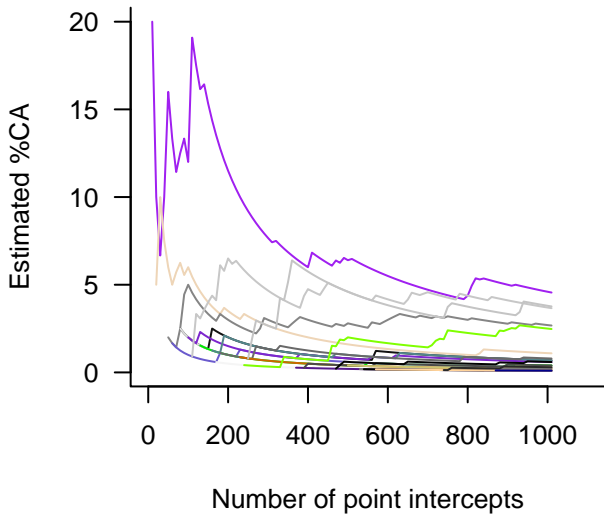

- Eucalyptus socialis subsp. socialis
- Eucalyptus oleosa subsp. oleosa
- Dodonaea viscosa subsp. angustata
- Zygodphyllum aurantiacum subsp.
- Eucalyptus dumosa

### SASMDD0008-57638

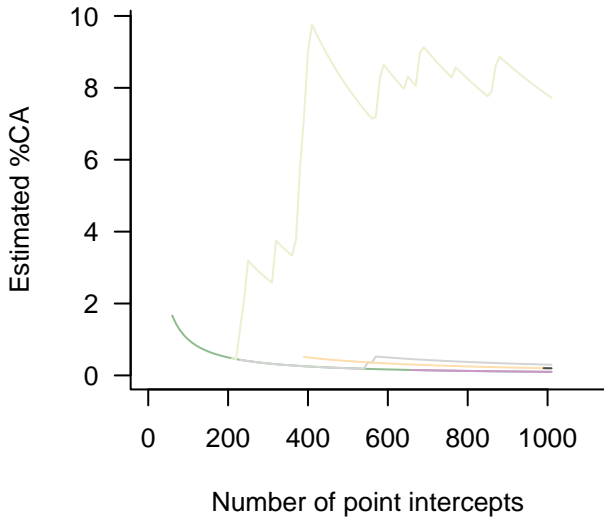

- Eucalyptus camaldulensis subsp.
- Atriplex suberecta
- Senecio cunninghamii var. cunni
- Atriplex sp.
- Atriplex semibaccata

### SASMDD0009-57008

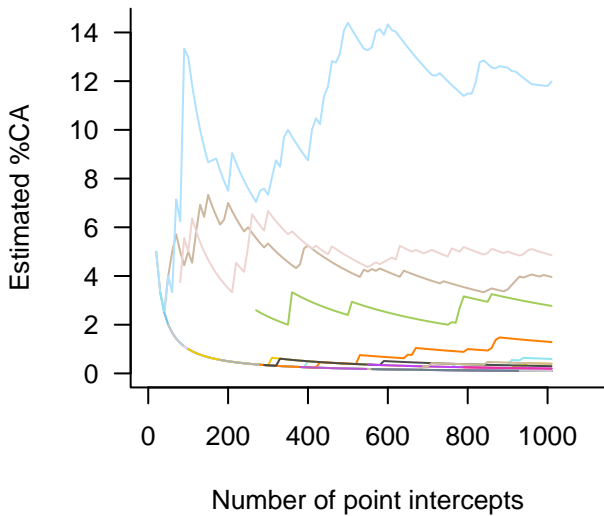

- Dodonaea viscosa subsp. angus
- Maireana pyramidata
- Medicago minima
- Callitris glaucophylla
- Olearia pimeleoides

### SASMDD0011-56998

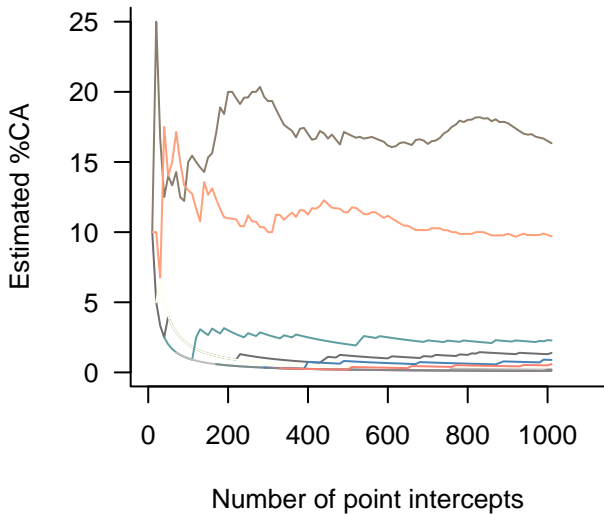

### SASMDD0012-56974

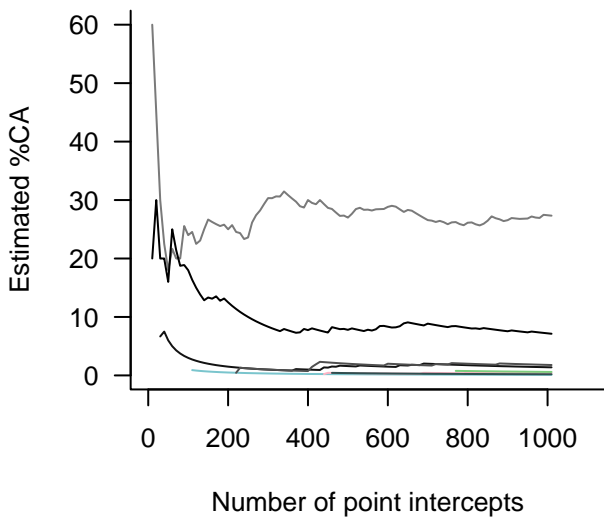

### SASMDD0013-56979

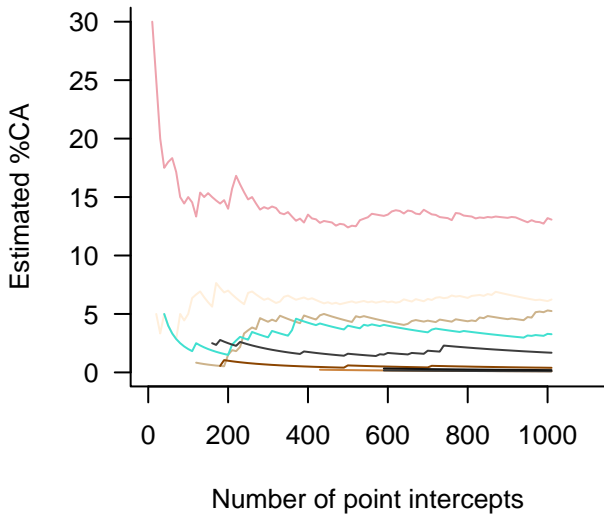

- Disphyma crassifolium subsp. cl.
- Mesembryanthemum nodiflorum
- Eucalyptus largiflorens
- Enchylaena tomentosa var. tome
- Sclerolaena tricuspis

### SASMDD0014-56980

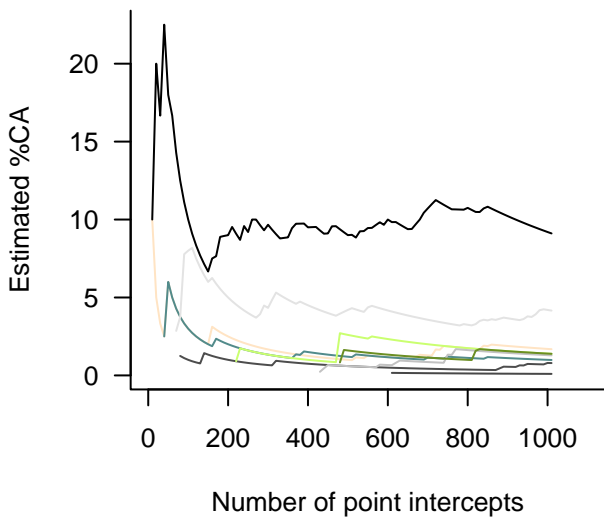

- Dodonaea viscosa* subsp. *angus*
- Maireana pyramidata*
- Rhagodia spinescens*
- Enchylaena tomentosa* var. *tome*
- Eucalyptus largiflorens* x *e.gracil*

### SASMDD0016-57000

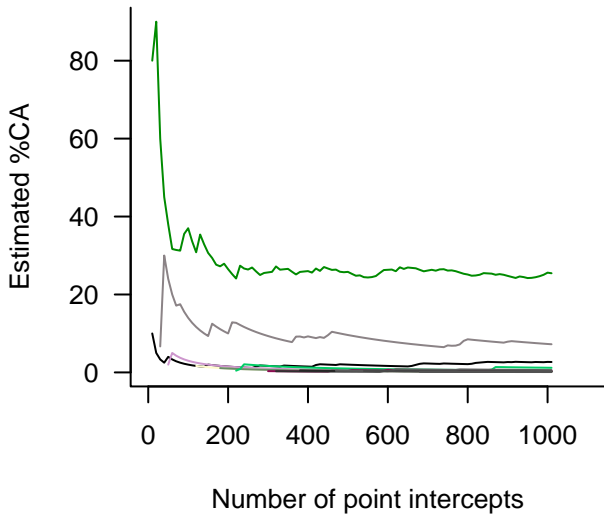

- Eucalyptus oleosa* subsp. *oleosa*
- Eucalyptus gracilis*
- Zygophyllum aurantiacum* subsp.
- Senna artemisioides* subsp. x cc
- Dissocarpus paradoxus*

### SASMDD0018-57010

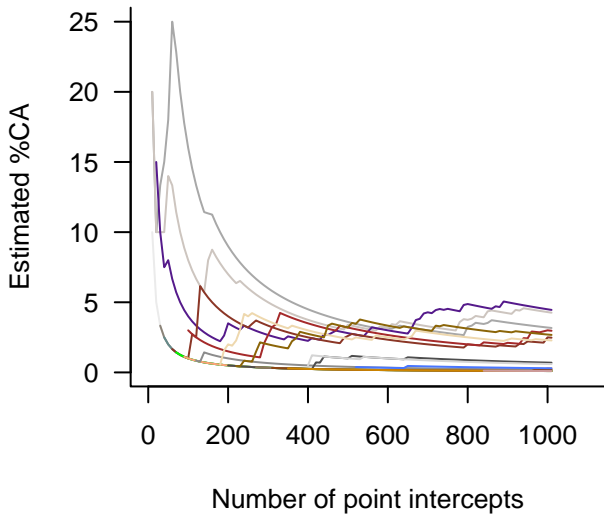

- Eucalyptus socialis* subsp. *socialis*
- Eucalyptus cyanopylla*
- Austrostipa scabra* subsp. *scabra*
- Eucalyptus gracilis*
- Triodia scariosa*

### SATEYB0001-56940

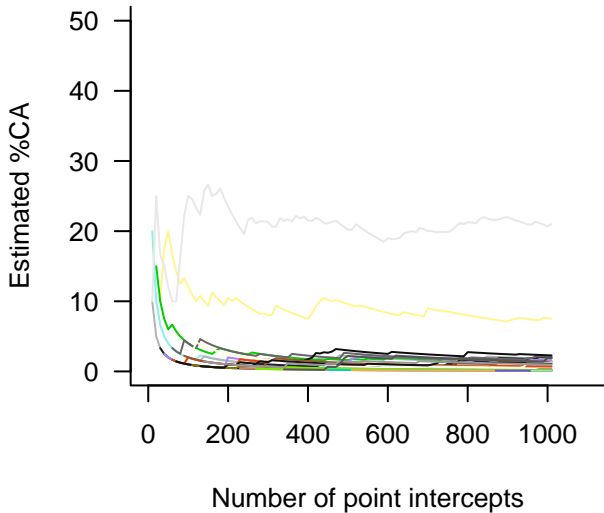

- Eucalyptus socialis* subsp. *socialis*
- Asparagus asparagoides*
- Callitris gracilis*
- Alyxia buxifolia*
- Enchylaena tomentosa* var. *tomentosa*

### SATEYB0002-56991

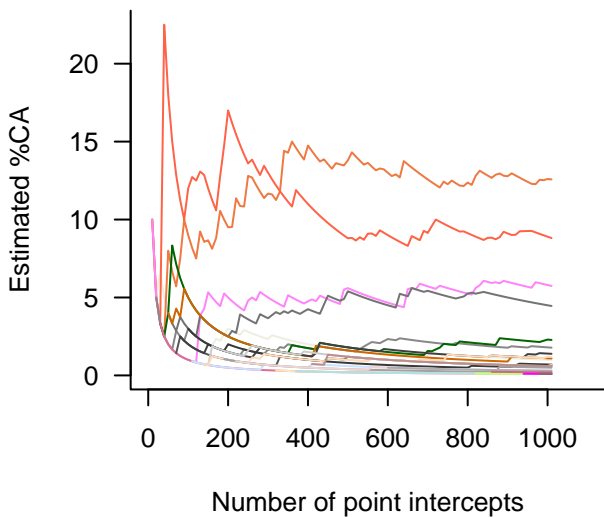

- Eucalyptus socialis* subsp. *socialis*
- Eucalyptus gracilis*
- Enchylaena tomentosa* var. *tomentosa*
- Geijera linearifolia*
- Myoporum platycarpum* subsp. *platycarpum*

### SATFLB0001-53698

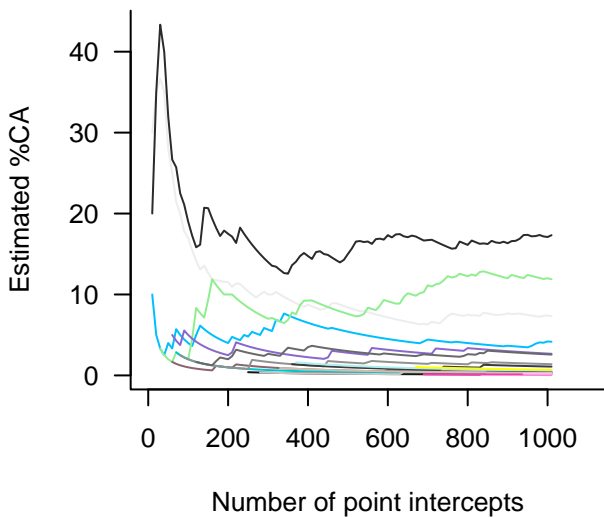

- *Callitris gracilis*
- *Eucalyptus fasciculosa*
- *Astroloma conostephioides*
- *Babingtonia behrii*
- *Allocasuarina verticillata*

### SATFLB0002-53703

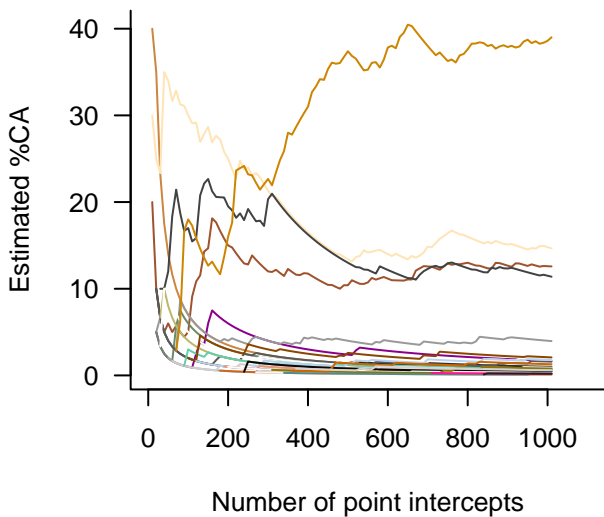

- *Xanthorrhoea semiplana* subsp.
- *Astroloma conostephioides*
- *Eucalyptus obliqua*
- *Acacia paradoxa*
- *Chamaescilla corymbosa* var. cc

### SATFLB0003-53704

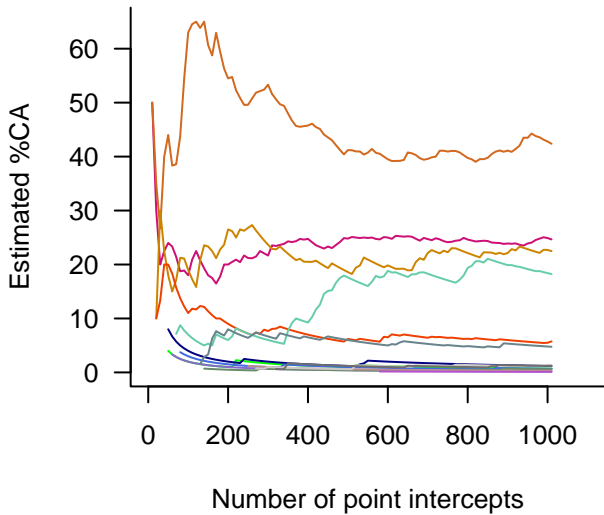

### SATFLB0004-53705

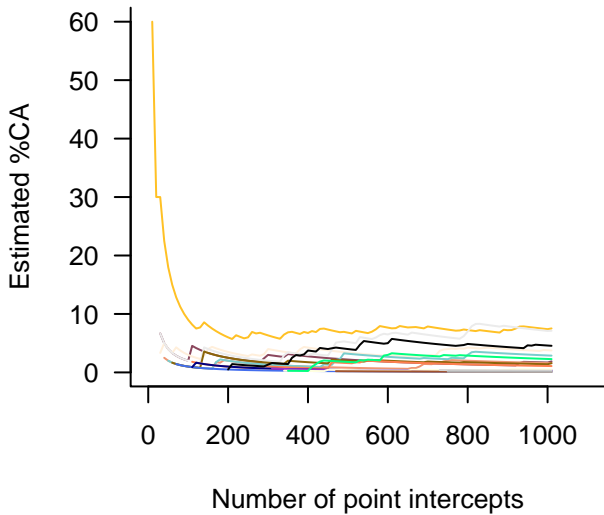



### SATFLB0005-53706

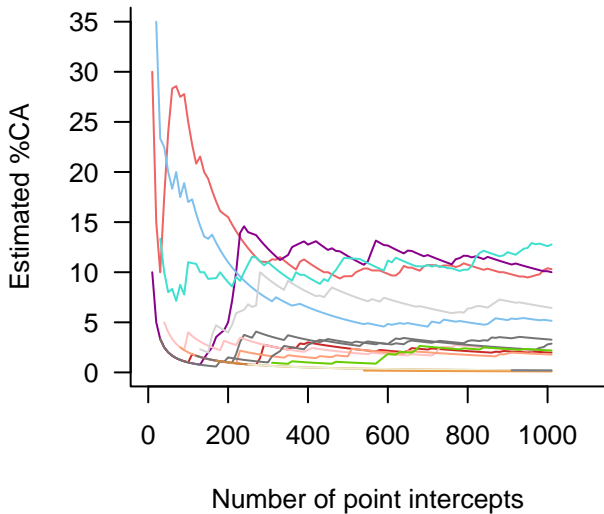

- Dodonaea viscosa subsp. angus*
- Chrysocephalum semipapposum*
- Goodenia vernicosa*
- Eucalyptus flindersii*
- Olearia decurrens*

### SATFLB0006-53708

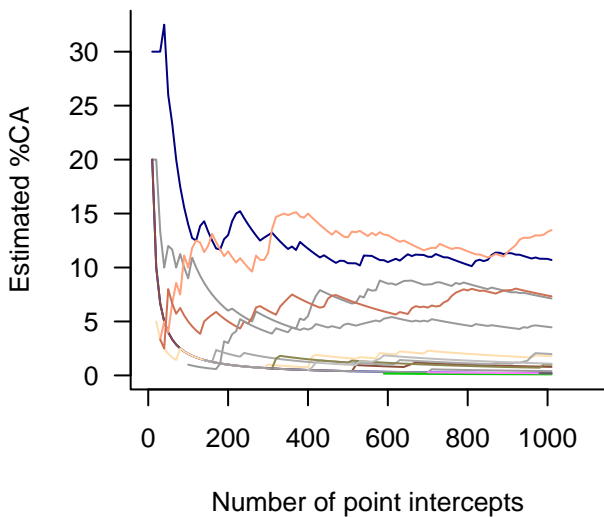

- Casuarina pauper*
- Acacia havilandiorum*
- Chrysocephalum semipapposum*
- Eucalyptus polybractea*
- Grevillea aspera*

### SATFLB0007-53709

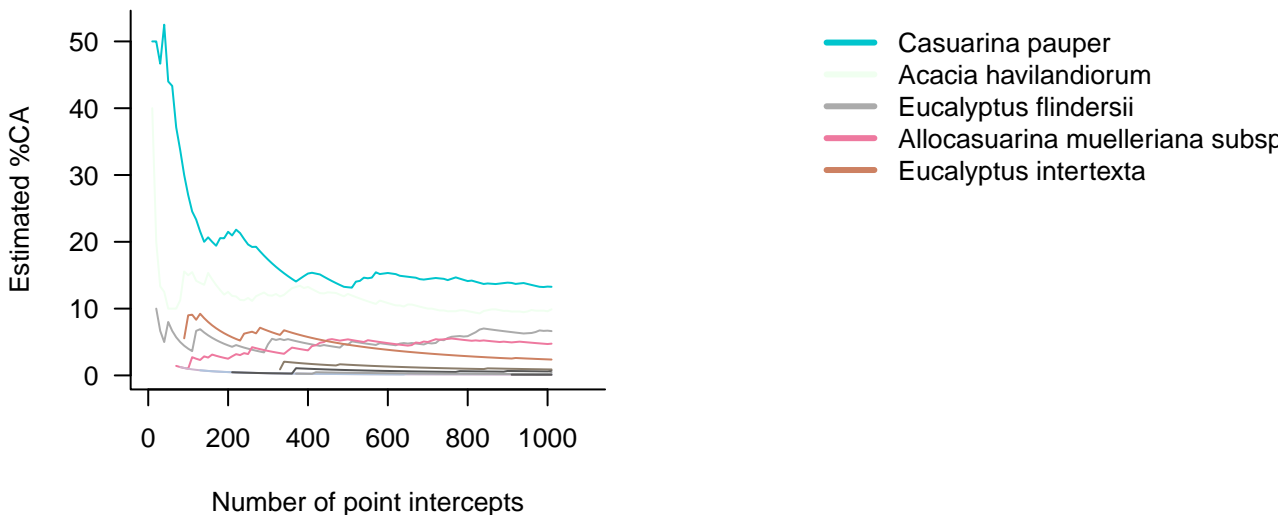

### SATFLB0008-53752

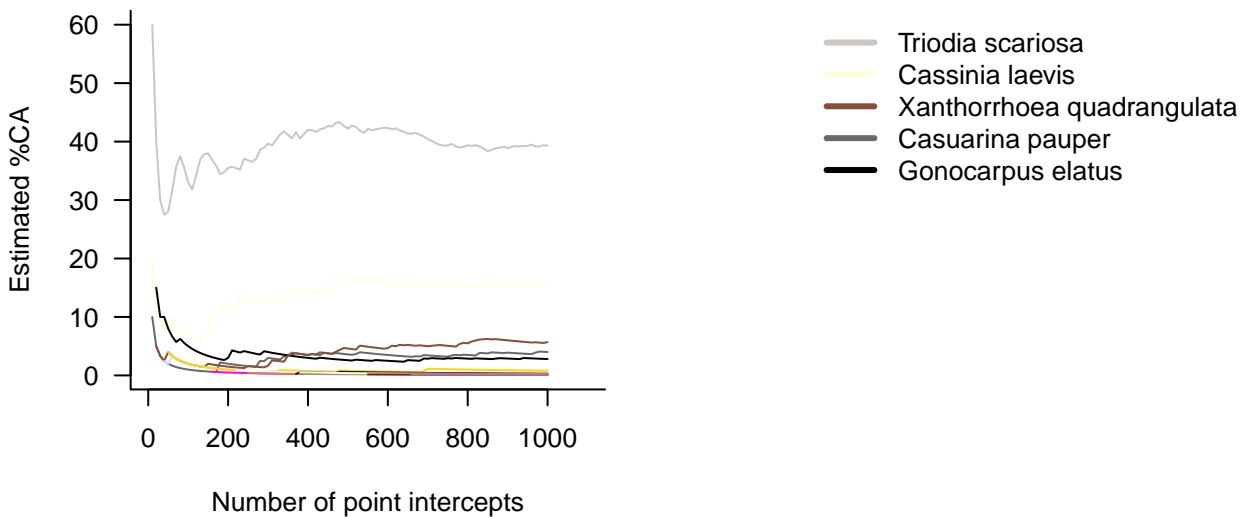

### SATFLB0009-53753

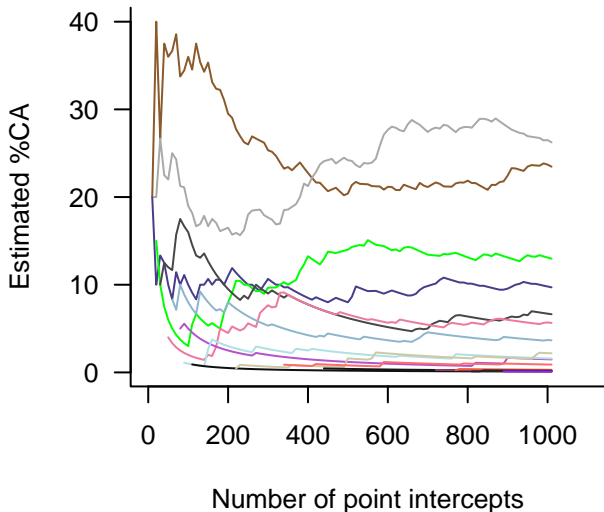

- Cassinia laevis*
- Xanthorrhoea quadrangulata*
- Eucalyptus cladocalyx*
- Wurmbea biglandulosa* subsp. fl.
- Casuarina pauper*

### SATFLB0010-53714

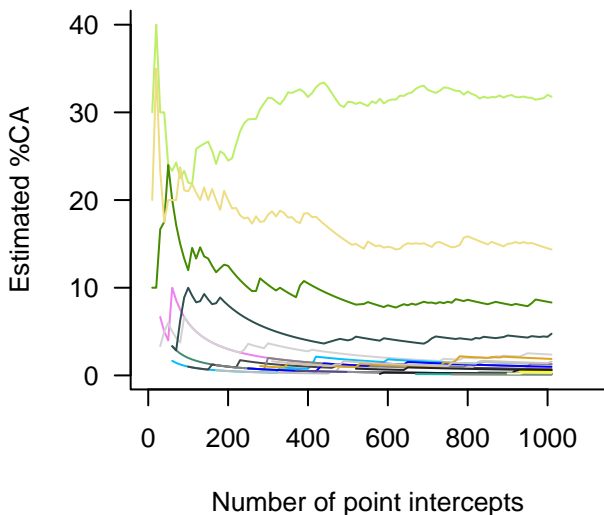

- Eucalyptus odorata*
- Rhagodia parabolica*
- Enchylaena tomentosa* var. tomentosa
- Olearia decurrens*
- Pimelea microcephala* subsp. microcephala

### SATFLB0011-53754

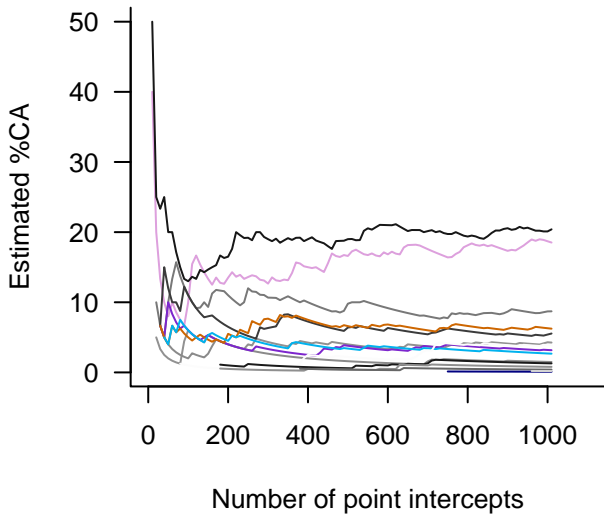

- Xanthorrhoea quadrangulata*
- Eucalyptus cladocalyx*
- Hibbertia crinita*
- Astroloma humifusum*
- Eucalyptus goniocalyx* subsp. *gc*

### SATFLB0012-53699

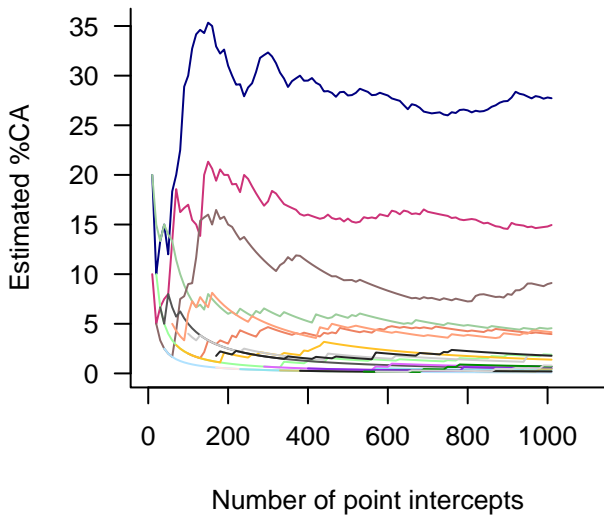

- Allocasuarina muelleriana* subsp.
- Hibbertia crinita*
- Calytrix tetragona*
- Gonocarpus elatus*
- Neurachne alopecuroides*

### SATFLB0013-53701

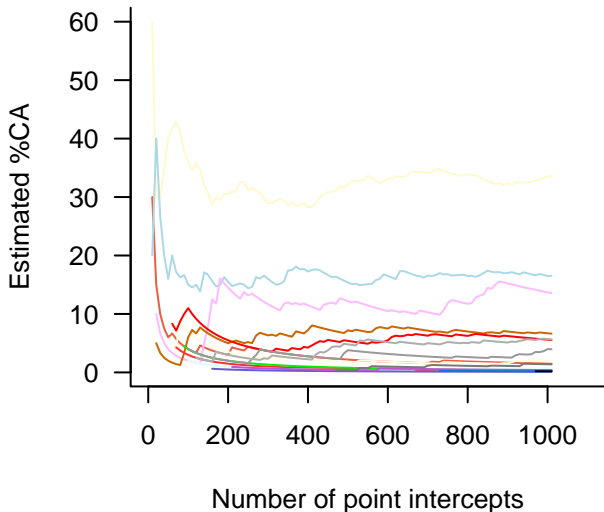

- Eucalyptus macrorhyncha*
- Astroloma conostephioides*
- Xanthorrhoea quadrangulata*
- Lomandra densiflora*
- Hibbertia exutiacies*

### SATFLB0014-53702

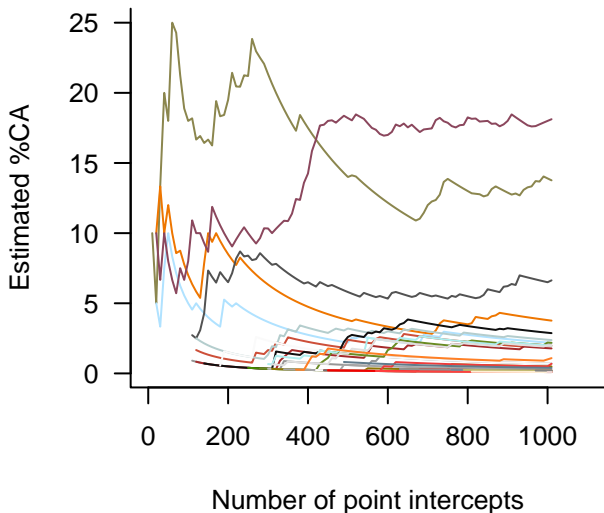

- Xanthorrhoea quadrangulata*
- Eucalyptus odorata*
- Allocasuarina verticillata*
- Bursaria spinosa* subsp. *spinosa*
- Eucalyptus goniocalyx* subsp. *gc*

### SATFLB0015-53707

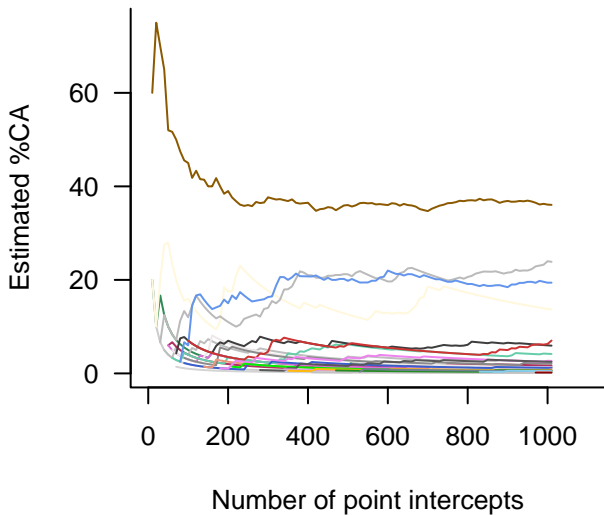

### SATFLB0016-53547

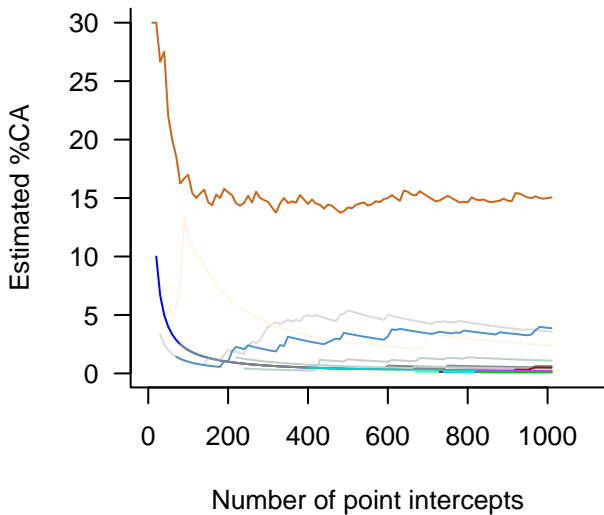

### SATFLB0017-53548

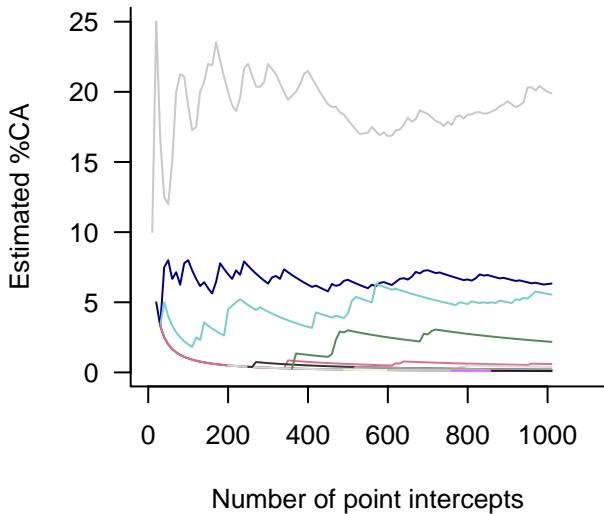

### SATFLB0018-53549

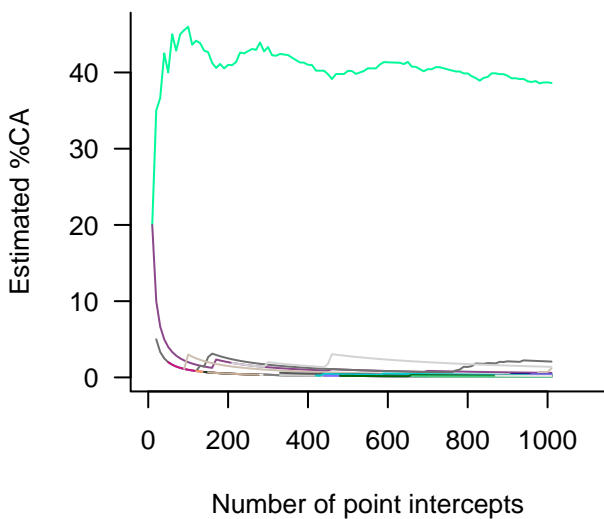

### SATFLB0019-53550

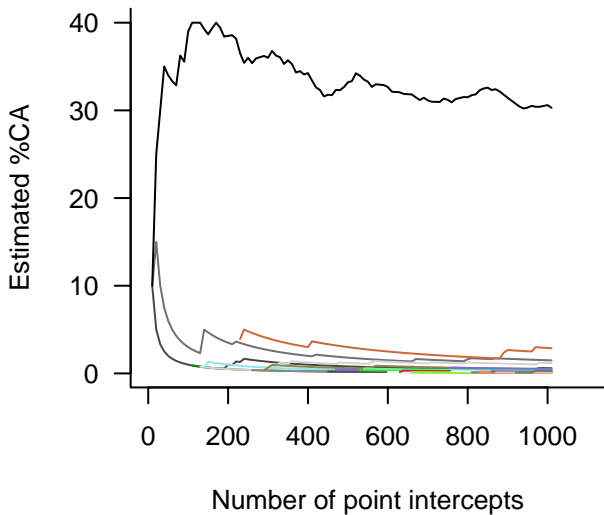

- *Triodia irritans*
- *Eucalyptus intertexta*
- *Rhagodia parabolica*
- No id
- *Maireana triptera*

### SATFLB0020-53551

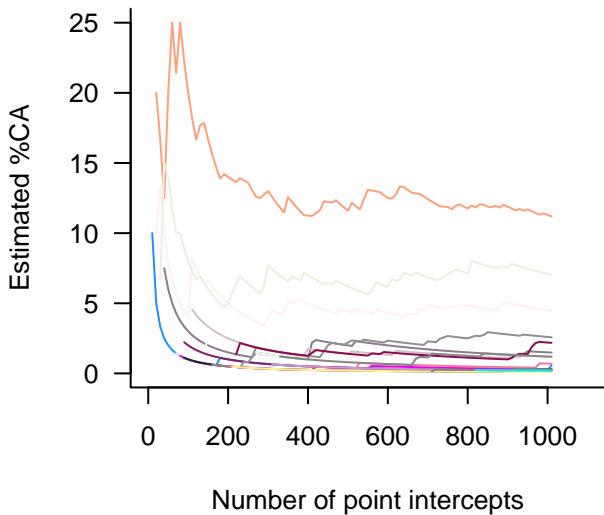

- *Eucalyptus socialis* subsp. *socia*
- *Amyema miquelii*
- *Myoporum platycarpum* subsp.  $\rho$
- *Sclerolaena diacantha*
- *Triodia scariosa*



### SATFLB0021-53552

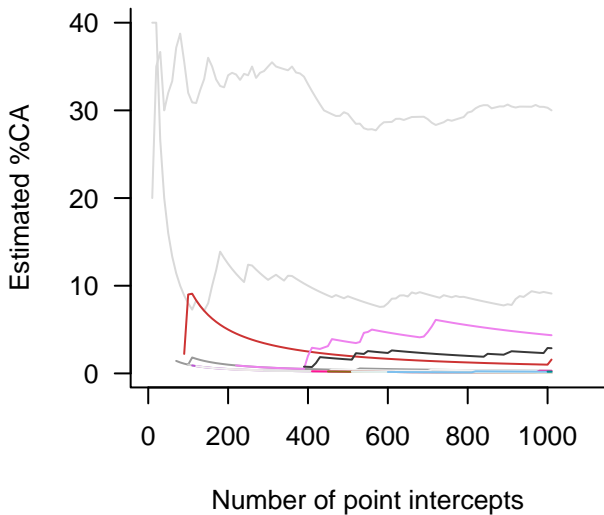

### SATFLB0022-53553

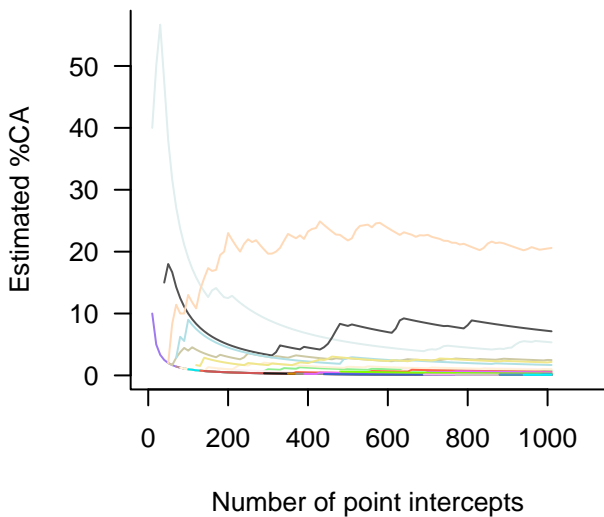

### SATFLB0023-53554

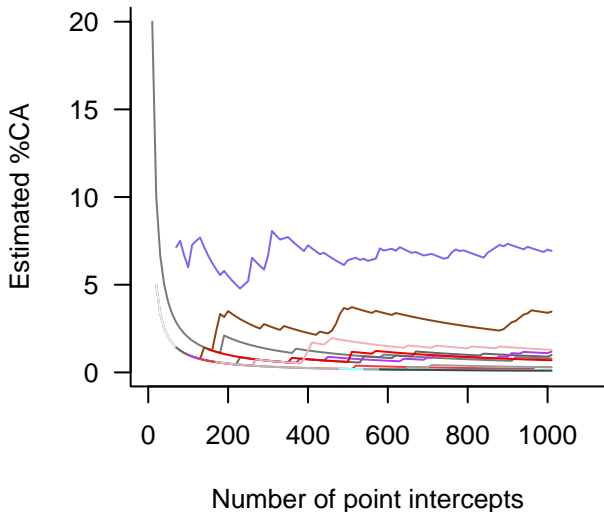

- Senna artemisioides* subsp. *x pe*
- Carrichtera annua*
- Enneapogon cylindricus*
- Sida intricata*
- Acacia victoriae* subsp. *victoriae*

### SATFLB0024-53555

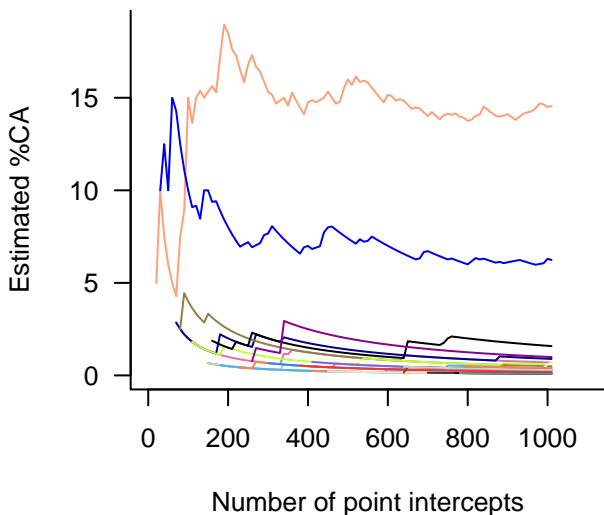

- Maireana pyramidata*
- Carrichtera annua*
- Rhagodia spinescens*
- Acacia victoriae* subsp. *victoriae*
- Minuria cunninghamii*

### SATFLB0025-53556

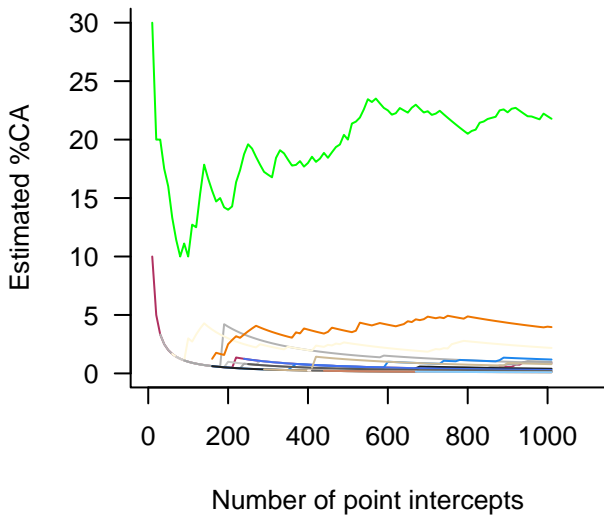

- Casuarina pauper*
- Atriplex vesicaria*
- Maireana rohrlachii*
- Carrichtera annua*
- Chenopodium desertorum* subsp.

### SATFLB0026-57001

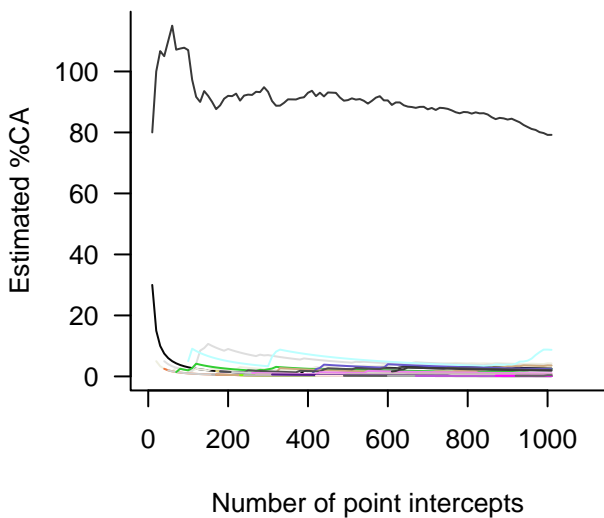

- Eucalyptus obliqua*
- Acacia pycnantha*
- Poa clelandii*
- Rytidosperma pilosum*
- Briza maxima*

### SATFLB0027-56975

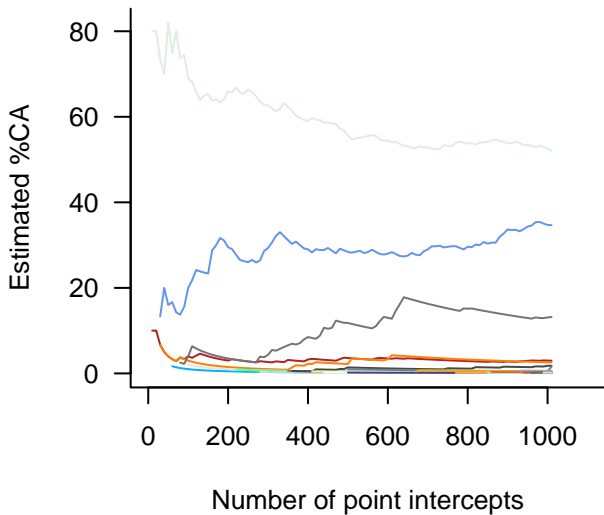

- Eucalyptus leucoxydon* subsp. *lei*
- Acacia pycnantha*
- Cheilanthes austrotenuifolia*
- Hibbertia exutiacies*
- Eucalyptus fasciculosa*

### SATFLB0028-56995

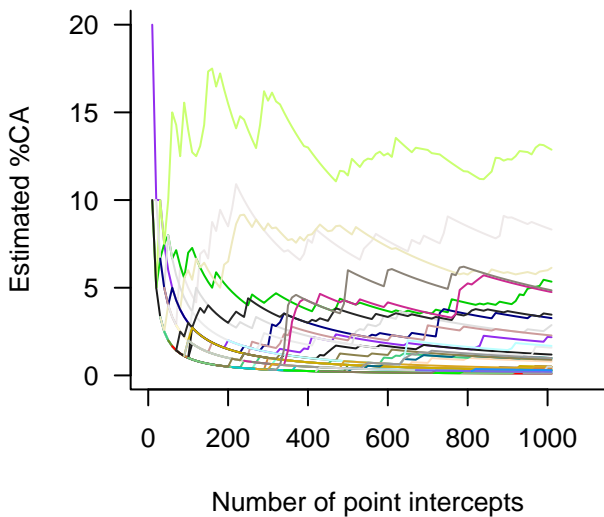

- Avena barbata*
- Allocasuarina verticillata*
- Austrostipa drummondii*
- Rytidosperma caespitosum*
- Eucalyptus odorata*

### SATKAN0001-53688

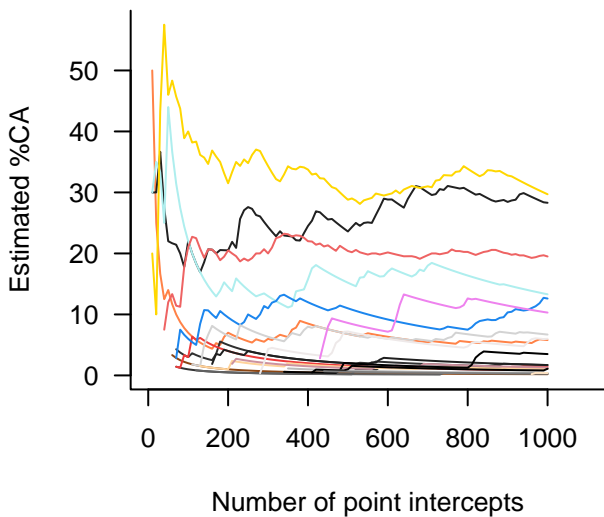

- Lepidosperma semiteres*
- Pultenaea involucrata*
- Eucalyptus baxteri*
- Xanthorrhoea semiplana* subsp.
- Lomandra fibrata*

### SATKAN0002-53689

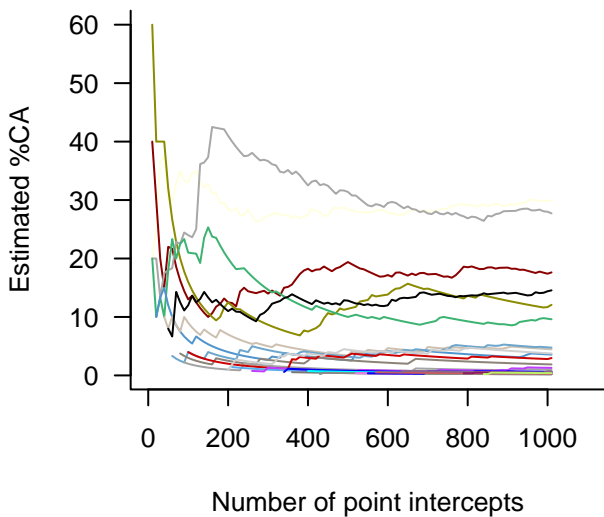

- Eucalyptus obliqua*
- Lepidosperma semiteres*
- Pultenaea involucrata*
- Hakea rostrata*
- Xanthorrhoea semiplana*

### SATKAN0003-56996

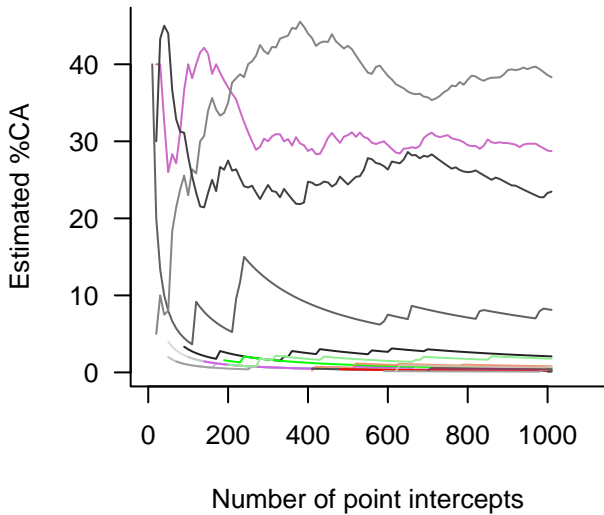

- *Eucalyptus leucoxyloides* subsp. *lei*
- *Dodonaea viscosa* subsp. *spatulifolia*
- *Acacia pycnantha*
- *Acacia paradoxa*
- *Avena barbata*

### SATKAN0004-56928

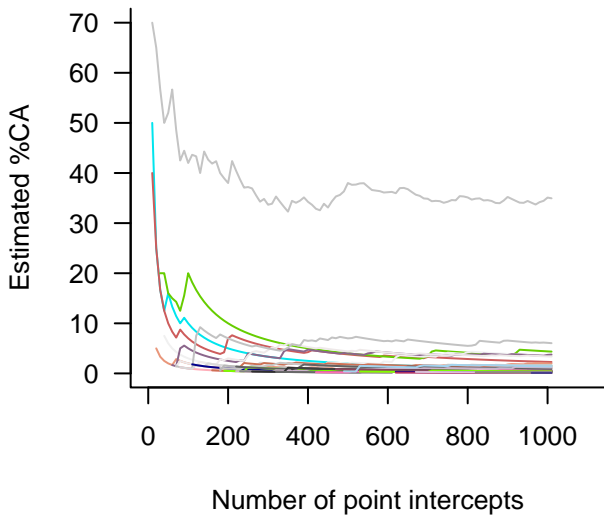

- *Eucalyptus fasciculosa*
- *Pentameris pallida*
- *Acacia paradoxa*
- *Eutaxia microphylla*
- *Bursaria spinosa* subsp. *lasiophylla*

### SATSTP0001-53557

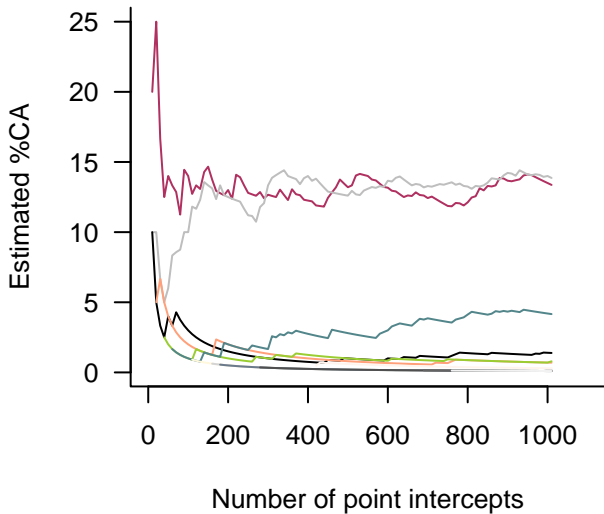

### SATSTP0002-53558

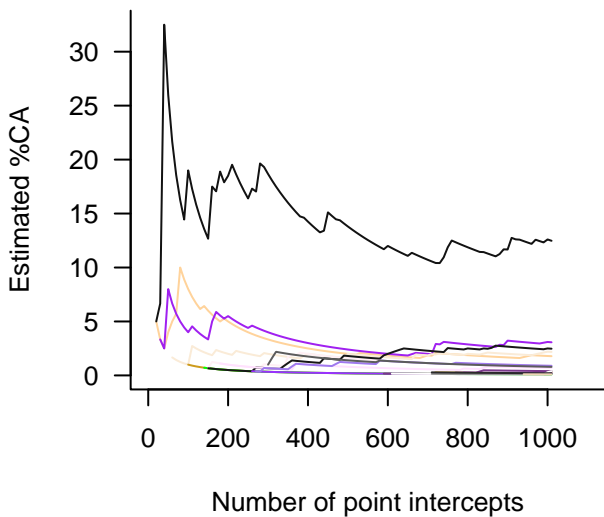

### SATSTP0003-53511

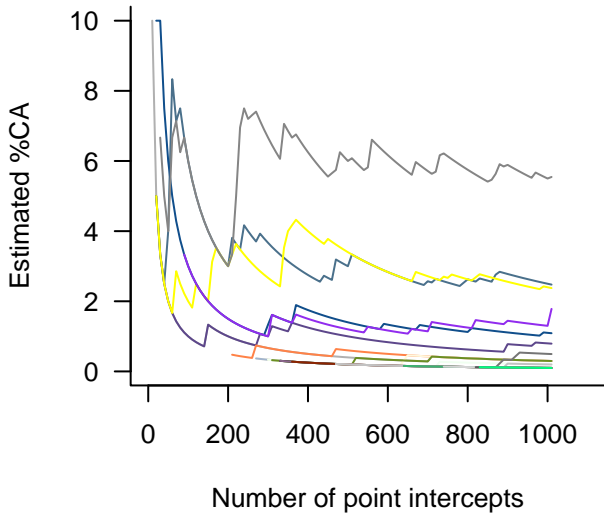

### SATSTP0004-53512

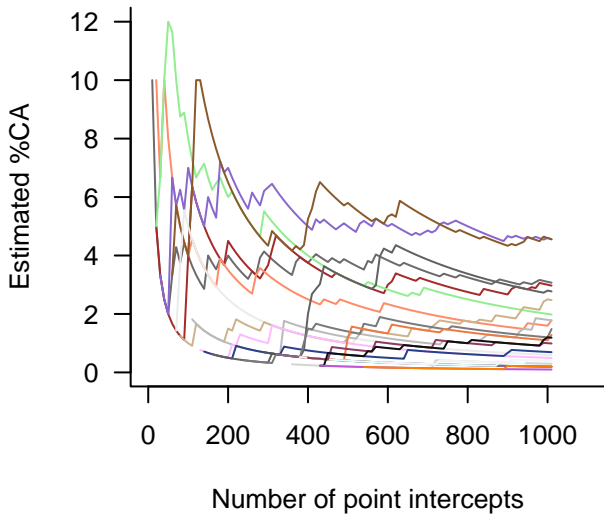



### SATSTP0005-53513

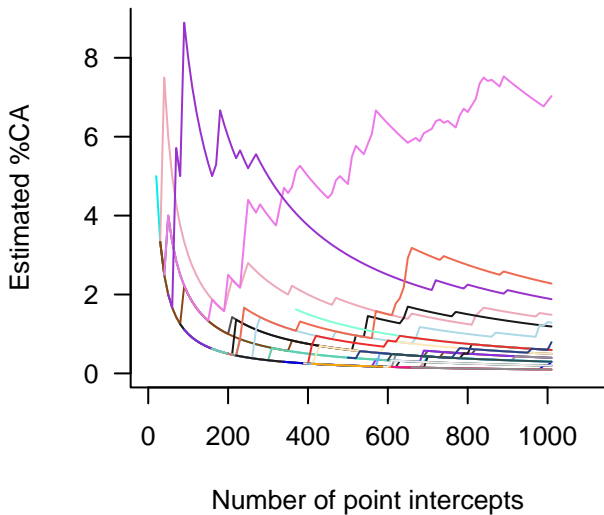

- Zygochloa paradoxa*
- Enchylaena tomentosa* var. *tomentosa*
- Dodonaea viscosa* subsp. *angustata*
- Polycalymma stuartii*
- Crotalaria eremaea* subsp. *eremaea*

### SATSTP0006-53514

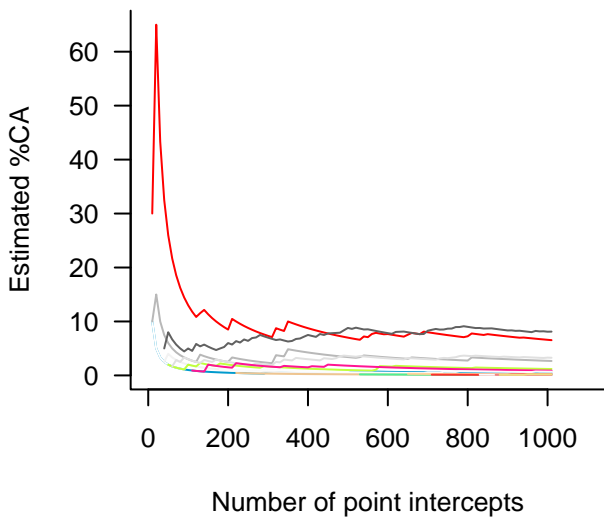

- Muehlenbeckia coccoloboides*
- Eucalyptus coolabah*
- Calotis hispidula*
- Enchylaena tomentosa* var. *tomentosa*
- Tetragonia moorei*

### SATSTP0007-53515

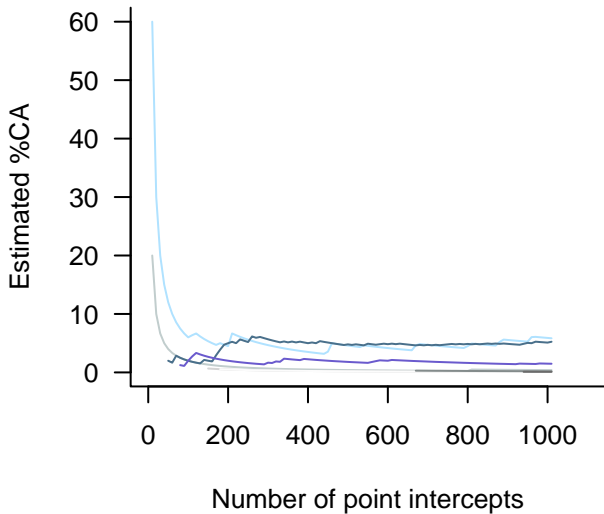

### SATSTP0008-53516

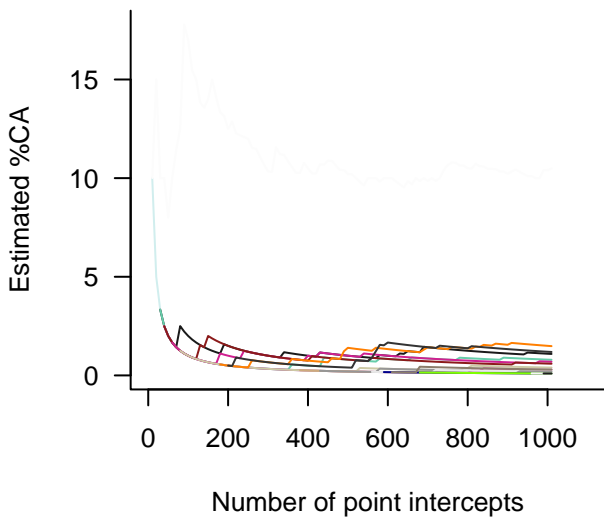

### VCAMDD0001-57011

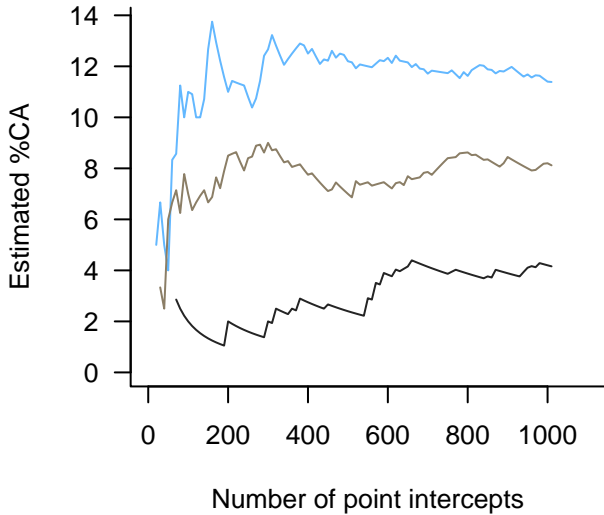

- Tecticornia pegrnulata*
- Tecticornia halocnemoides*
- Disphyma crassifolium* subsp. *cl...*

### VCAMDD0002-56990

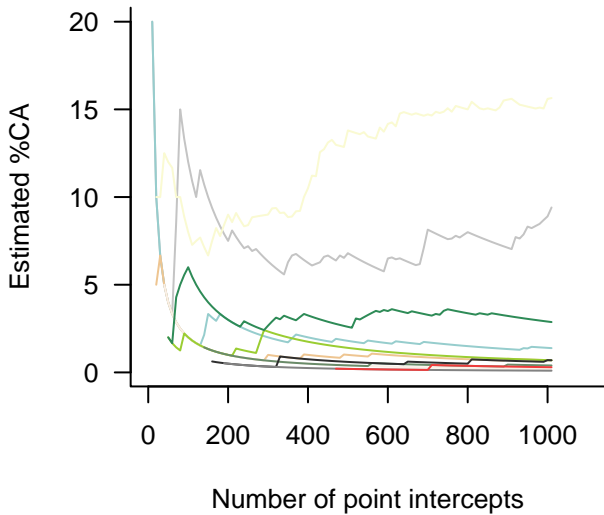

- Atriplex* sp.
- Casuarina pauper*
- Podolepis aristata* subsp. *affinis*
- Enchylaena tomentosa*
- Erodium crinitum*

### VCAMDD0003-57012

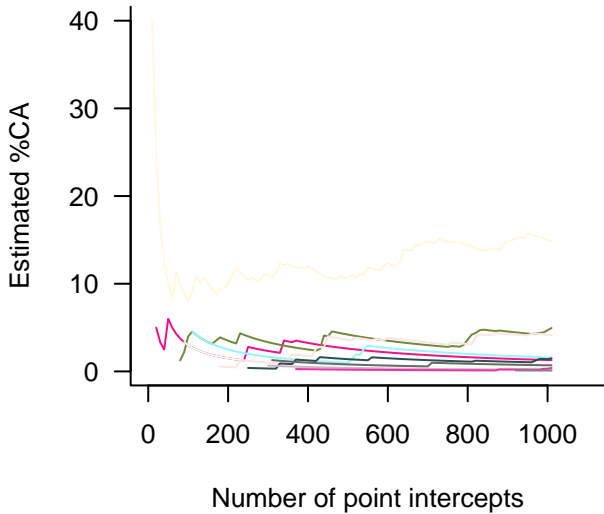

- Eucalyptus socialis* subsp. *socia*
- Eucalyptus oleosa*
- Eucalyptus gracilis*
- Leptospermum* sp.
- Enchylaena tomentosa*

### WAACOO0001-53444

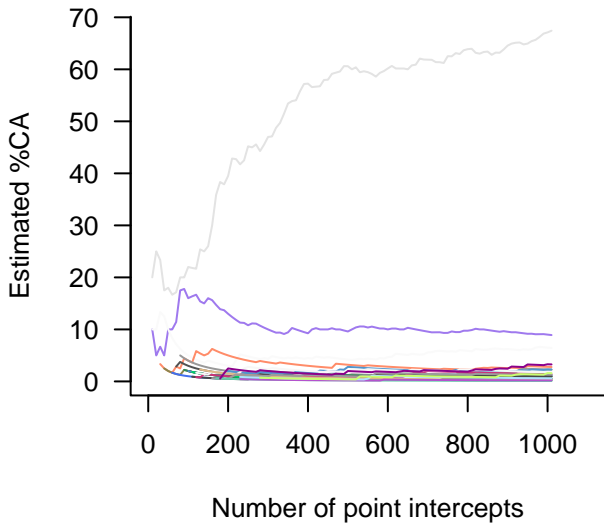

- Allocasuarina spinosissima*
- Thryptomene kochii*
- Euryomyrtus maidenii*
- Beyeria sulcata* var. *sulcata*
- Melaleuca cordata*

### WAACOO0002-53445

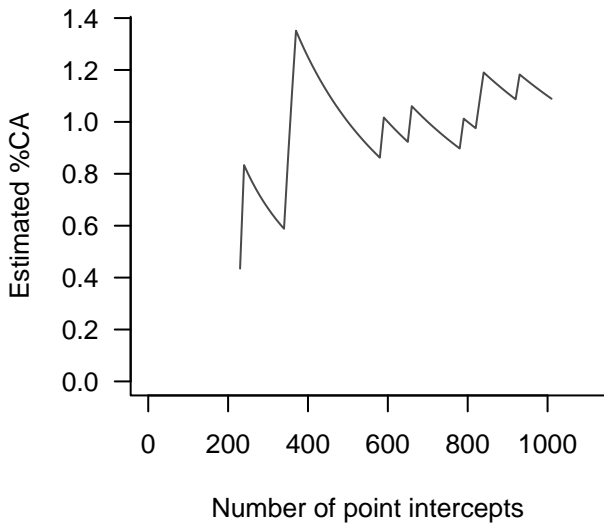

— *Muehlenbeckia florulenta*

### WAACOO0003-53447

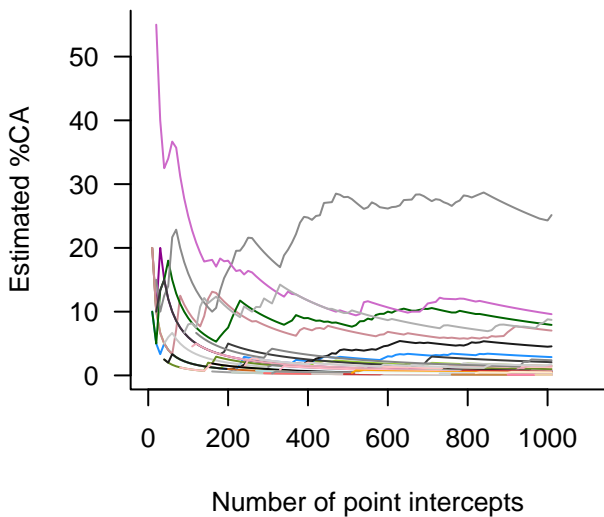

— *Acacia beauverdiana*  
— *Allocasuarina spinosissima*  
— *Eucalyptus loxophleba subsp. lis*  
— *Thryptomene kochii*  
— *Melaleuca hamata*

### WAACOO0004-53449

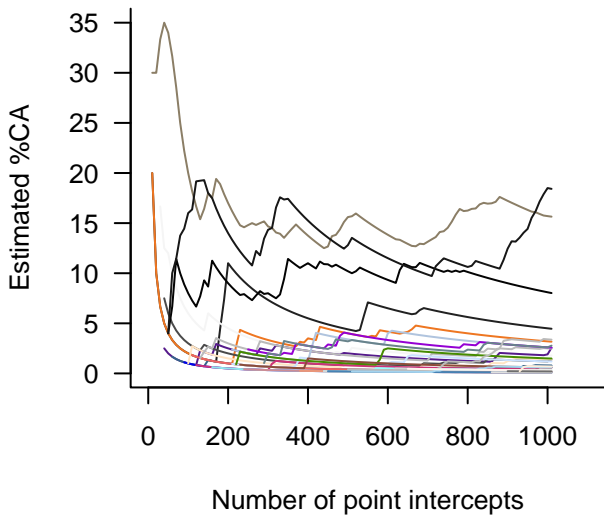

- Acacia sp. narrow phyllode (b.r.n)
- Melaleuca lateriflora
- Acacia enervia subsp. enervia
- Melaleuca pauperiflora subsp. fa
- Acacia gibbosa

### WAACOO0005-53446

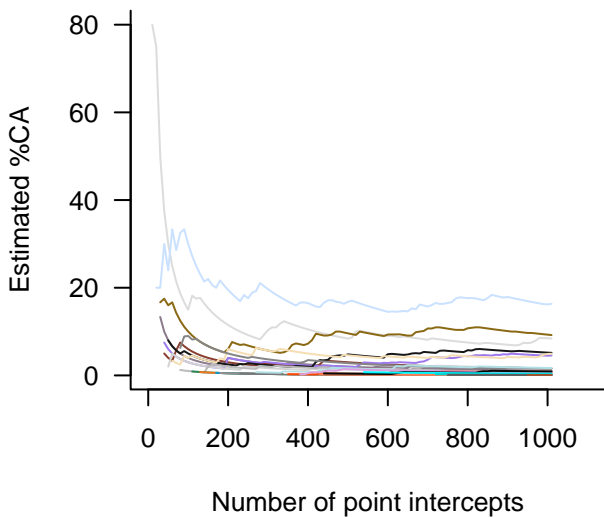

- Aristida contorta
- Tripogon loliiformis
- Acacia coolgardiensis
- Borya constricta
- Acacia sp. narrow phyllode (b.r.n)

### WAACOO0006-53438

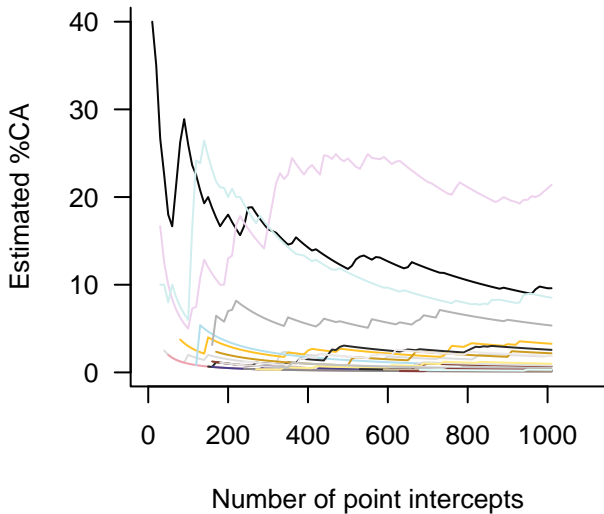

- Eucalyptus salubris*
- Melaleuca pauperiflora* subsp. *fa*
- Acacia enervia* subsp. *enervia*
- Alyxia buxifolia*
- Exocarpos aphyllus*

### WAACOO0007-53440

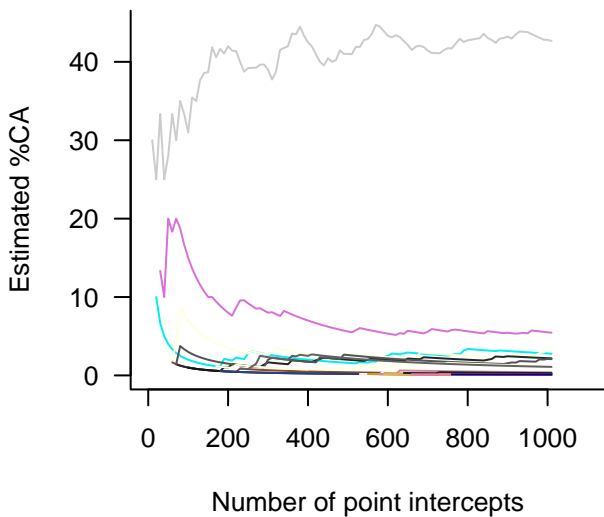

- Acacia hemiteles*
- Eucalyptus yilgarnensis*
- Acacia* sp. narrow phyllode (b.r.n)
- Eucalyptus* sp.
- Eremophila ionantha*

### WAACOO0008-53442

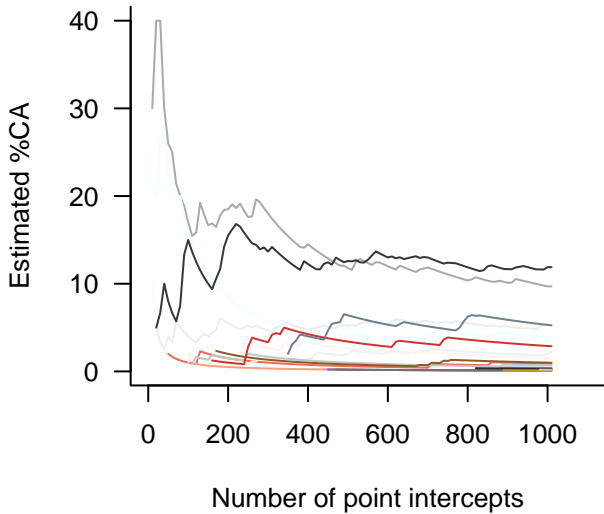

- *Eucalyptus yilgarnensis*
- *Eucalyptus salubris*
- *Austrostipa nitida*
- *Melaleuca pauperiflora* subsp. *fa*
- *Templetonia ceracea*

### WAACOO0009-53443

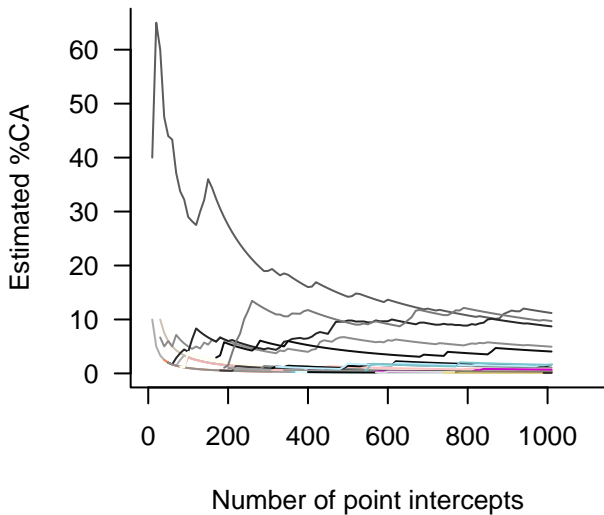

- *Melaleuca lateriflora*
- *Peplidium aithocheilum*
- *Tecticornia indica* subsp. *bidens*
- *Sarcozona praecox*
- *Callistemon phoeniceus*



### WAACOO0010-53441

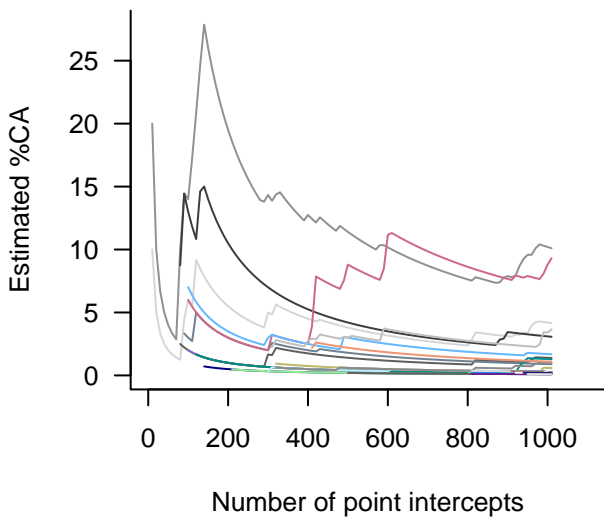

- *Eriachne ovata*
- *Acacia sp. narrow phyllode (b.r.n)*
- *Aristida contorta*
- *Lepidosperma rigidulum*
- *Centrolepis strigosa subsp. rupe*

### WAACOO0011-53439

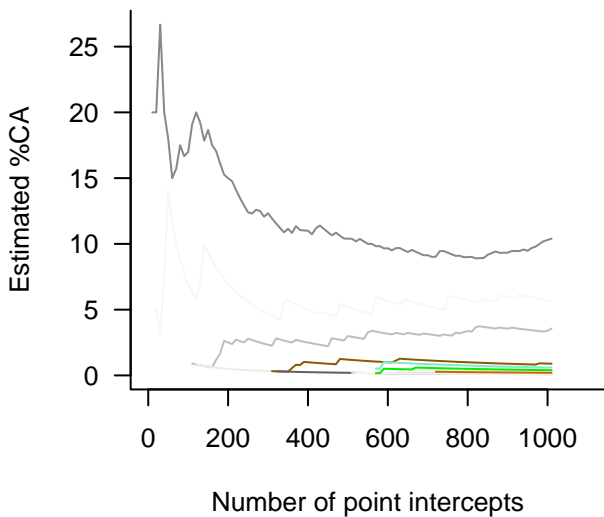

- *Frankenia cinerea*
- *Callitris columellaris*
- *Tecticornia sp.*
- *Maireana erioclada*
- *Lysiana casuarinae*

### WAACOO0012-53462

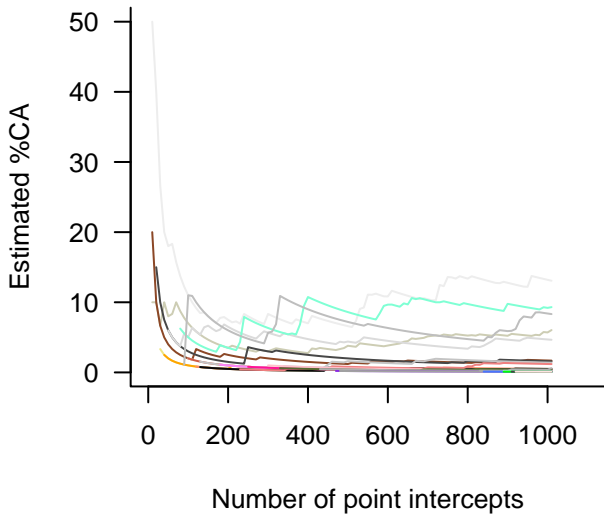

- Eucalyptus urna*
- Eucalyptus yilgarnensis*
- Eucalyptus salmonophloia*
- Atriplex stipitata*
- Eremophila ionantha*

### WAACOO0016-53459

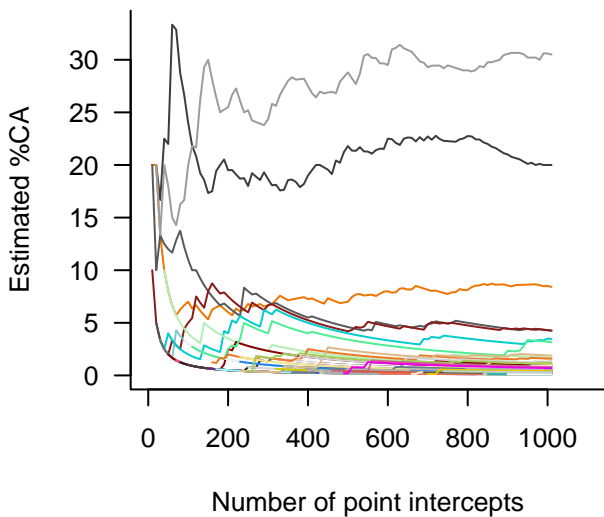

- Allocasuarina spinosissima*
- Lepidobolus preissianus* subsp.
- Triodia rigidissima*
- Beaufortia interstans*
- Beyeria sulcata* var. *sulcata*

### WAACOO0017-53460

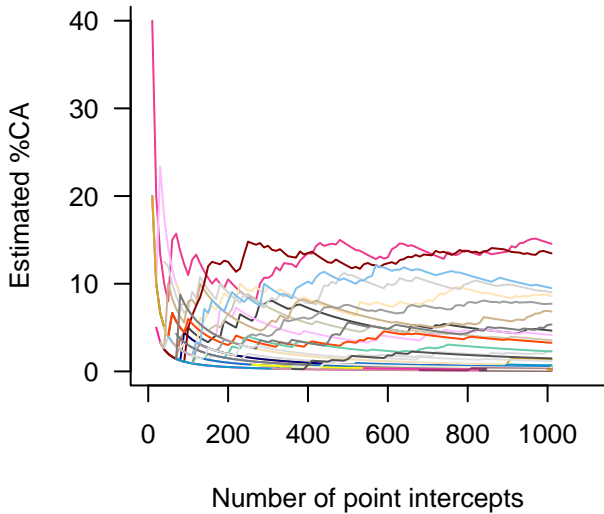

- Acacia desertorum var. nudipes
- Lepidobolus preissianus subsp.
- Melaleuca cordata
- Allocasuarina corniculata
- Borya constricta

### WAACOO0018-53461

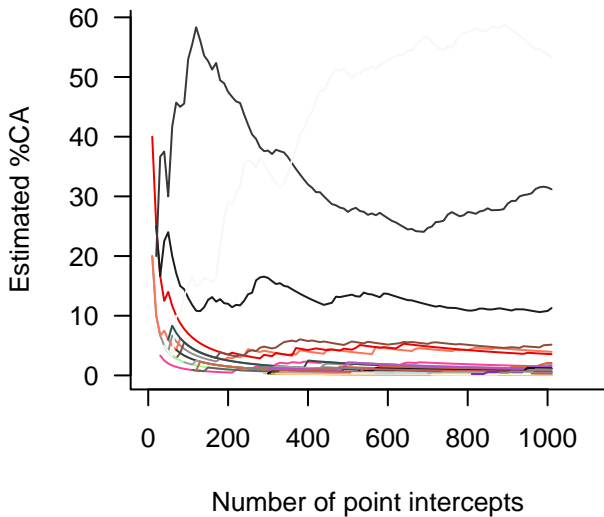

- Acacia desertorum var. nudipes
- Allocasuarina spinosissima
- Lepidobolus preissianus subsp.
- Triodia rigidissima
- Lepidosperma sanguinolentum

### WAACOO0019-53463

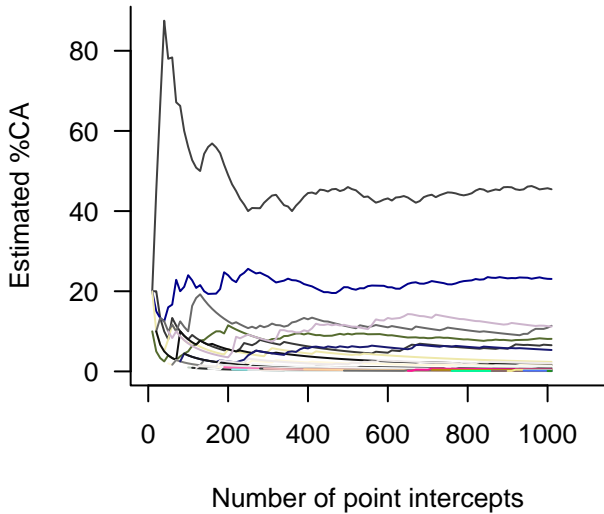

### WAACOO0020-53450

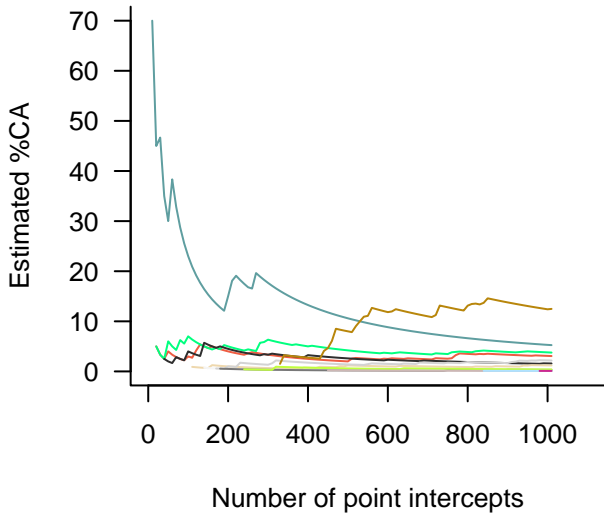

### WAACOO0021-53456

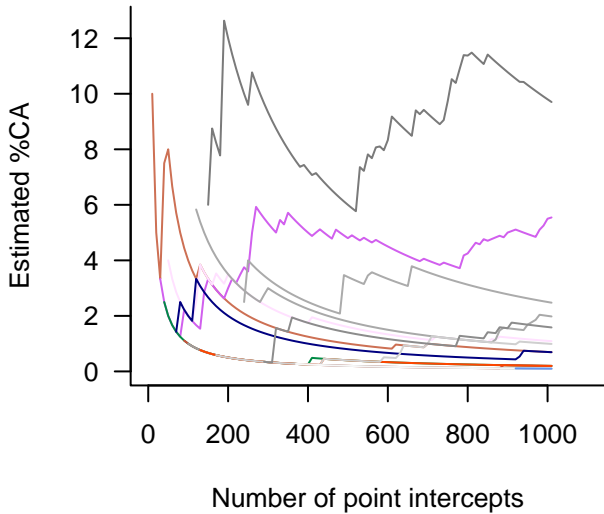

- Eucalyptus salubris
- Maireana sedifolia
- Eucalyptus salmonophloia
- Maireana pyramidata
- Eremophila scoparia

### WAACOO0022-53453

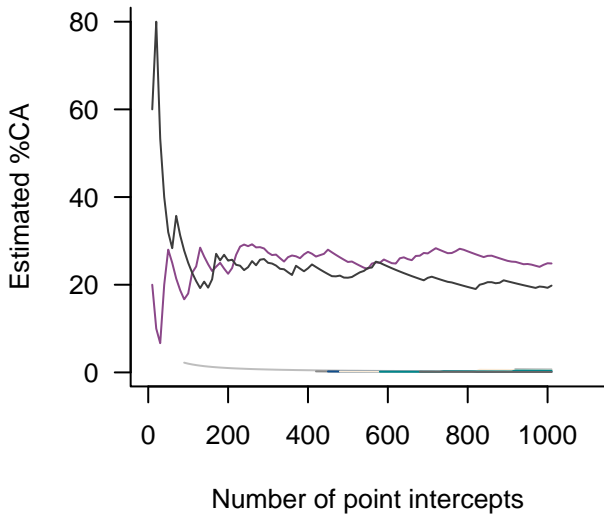

- Eucalyptus clelandii
- Eucalyptus celastroides subsp. c
- Eucalyptus longissima
- Eucalyptus transcontinentalis
- Eremophila scoparia

### WAACOO0023-53448

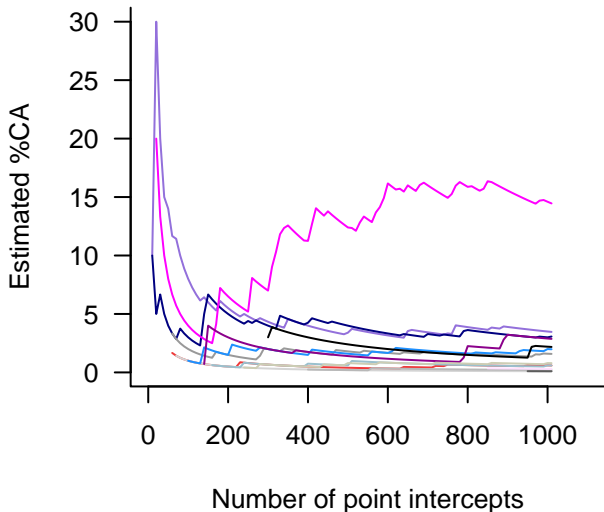

- Eucalyptus transcontinentalis*
- Eremophila scoparia*
- Atriplex nummularia* subsp. *spati*
- Eucalyptus salmonophloia*
- Eucalyptus salubris*

### WAACOO0024-53451

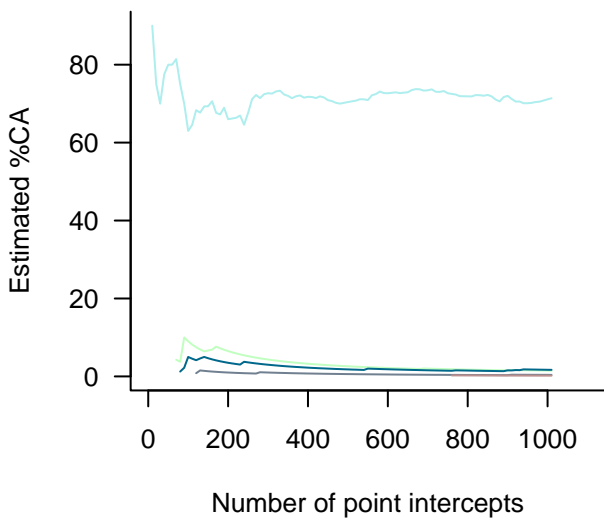

- Acacia incurvaneura*
- Eremophila granitica*
- Acacia caesaneura*
- Acacia acuminata*
- Cheilanthes sieberi* subsp. *siebei*

### WAACOO0025-53452

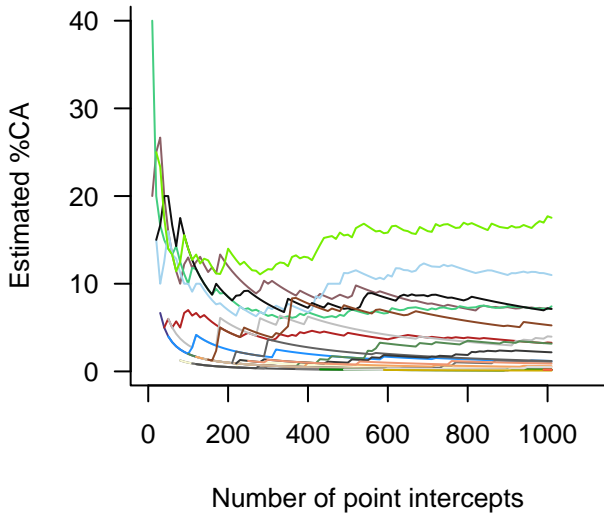

- Atriplex vesicaria*
- Salvia verbenaca*
- Maireana sedifolia*
- Austrostipa nitida*
- Enneapogon caerulescens*

### WAACOO0026-53454

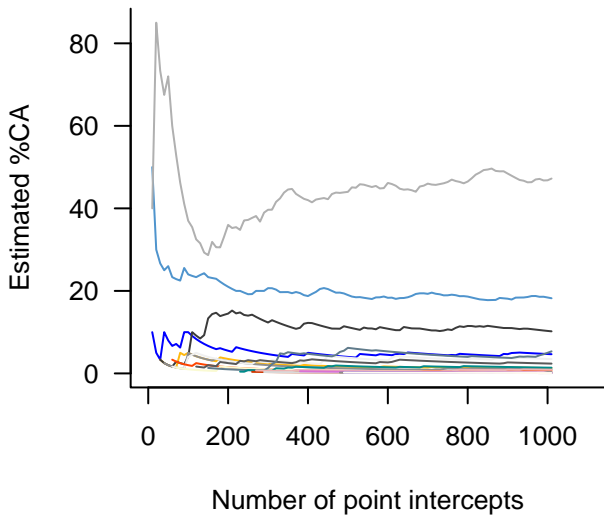

- Acacia yorkkrakinensis* subsp. *ac*
- Triodia* sp.
- Allocasuarina spinosissima*
- Acacia resinimarginea*
- Eucalyptus leptopoda* subsp. *sul*

### WAACOO0027-53455

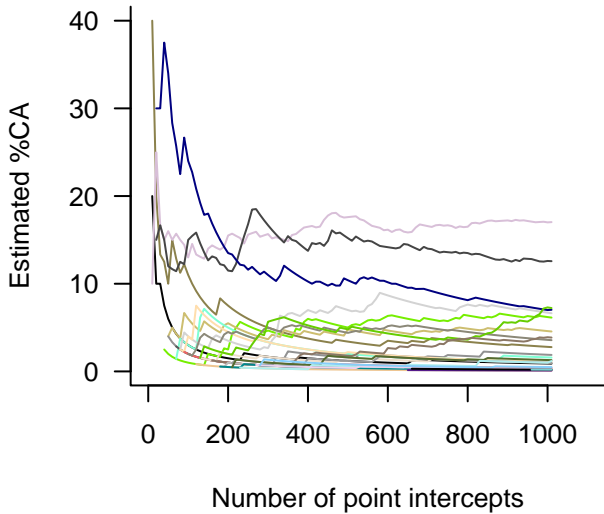

- *Triodia rigidissima*
- *Melaleuca calyptroides*
- *Conospermum stoechadis* subsp.
- *Calothamnus gilesii*
- *Allocasuarina spinosissima*

### WAACOO0028-53457

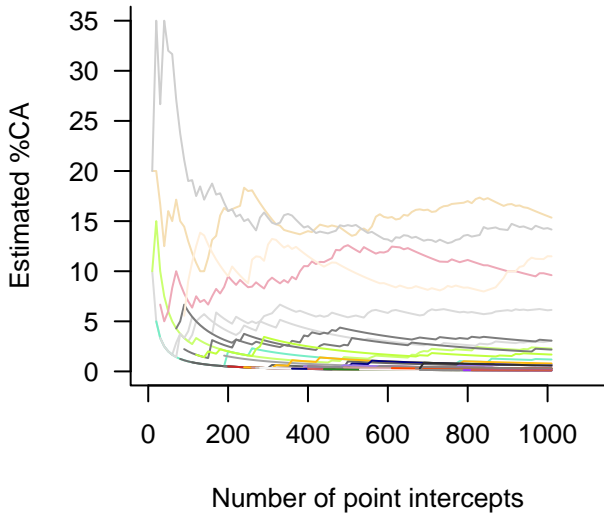

- *Triodia rigidissima*
- *Acacia sibina*
- *Acacia cylindrica*
- *Allocasuarina spinosissima*
- *Keraudrenia velutina* subsp. ellip



### WAACOO0029-53458

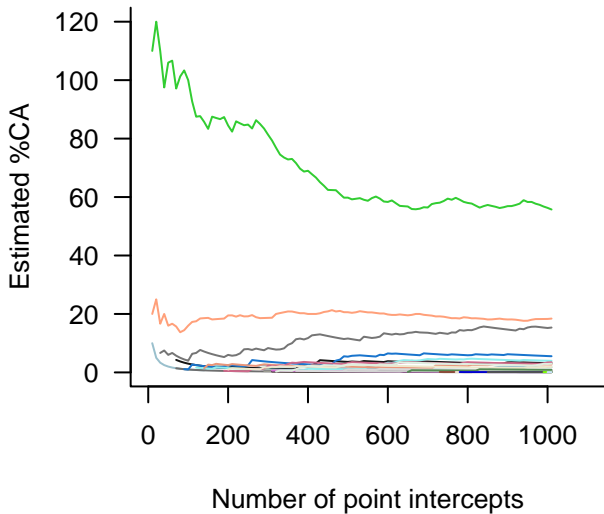

- *Acacia yorkrakinensis* subsp. *ac*
- *Triodia rigidissima*
- *Chrysitrix distigmata*
- *Eucalyptus rigidula*
- *Melaleuca cordata*

### WAACOO0030-56958

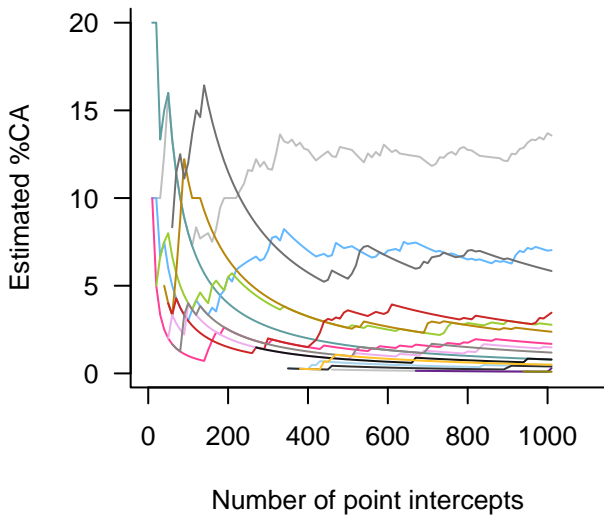

- *Maireana sedifolia*
- *Austrostipa puberula*
- *Carrichtera annua*
- *Sclerolaena uniflora*
- *Euphorbia multifaria*

### WAAGVD0001-56960

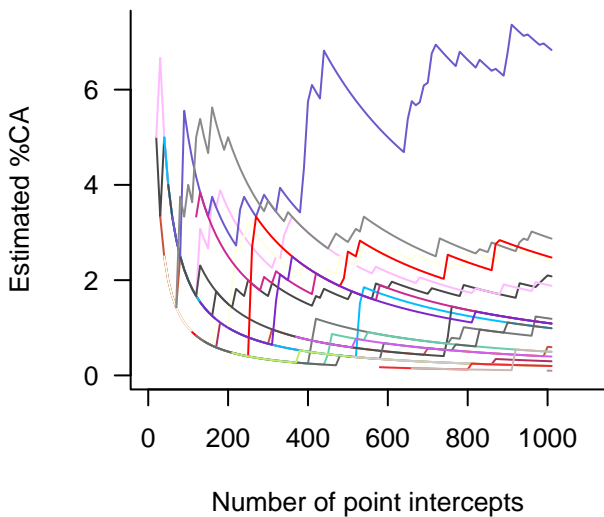

- Acacia caesaneura
- Senna artemisioides subsp. x pe
- Senna artemisioides subsp. filifo
- Casuarina pauper
- Ptilotus obovatus

### WAAHAM0001-56964

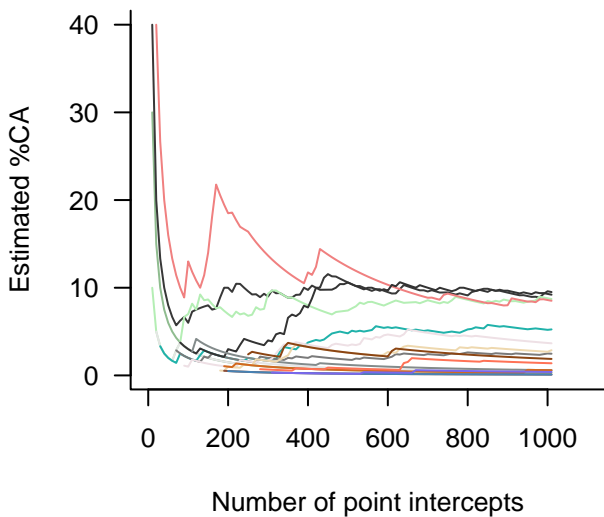

- Rhagodia crassifolia
- Acacia anceps
- Frankenia sessilis
- Melaleuca lanceolata
- Threlkeldia diffusa

### WAAHAM0002-56941

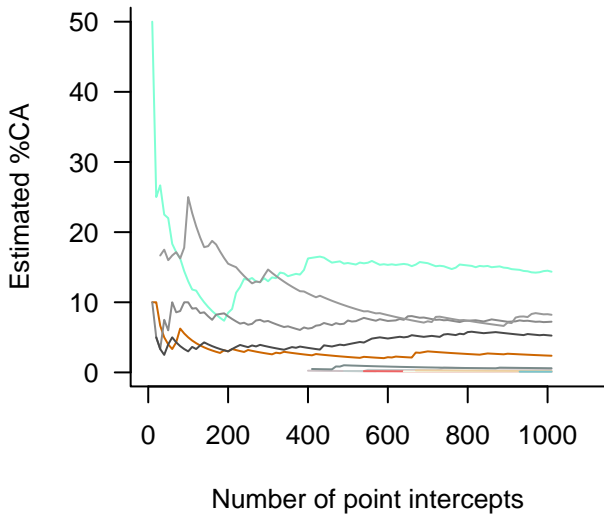

### WAAHAM0003-56959

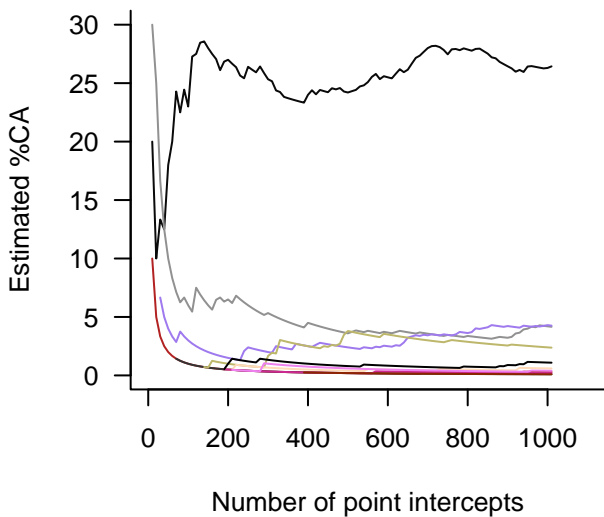

### WAAHAM0004-56942

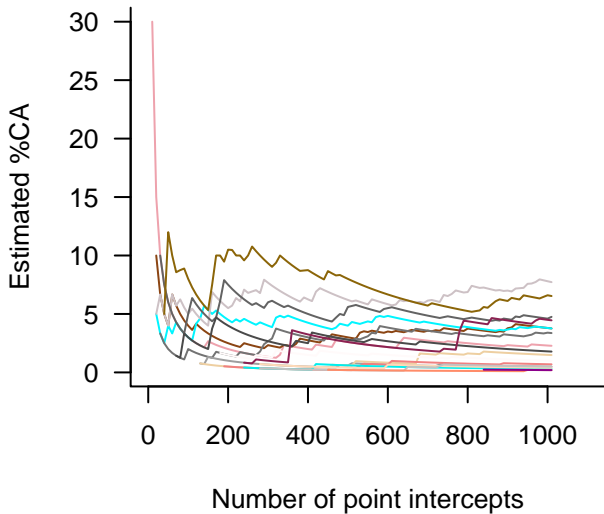

- Maireana sedifolia*
- Cratystylis conocephala*
- Carrichtera annua*
- Acacia papyrocarpa*
- Euphorbia multifaria*

### WAAHAM0005-56961

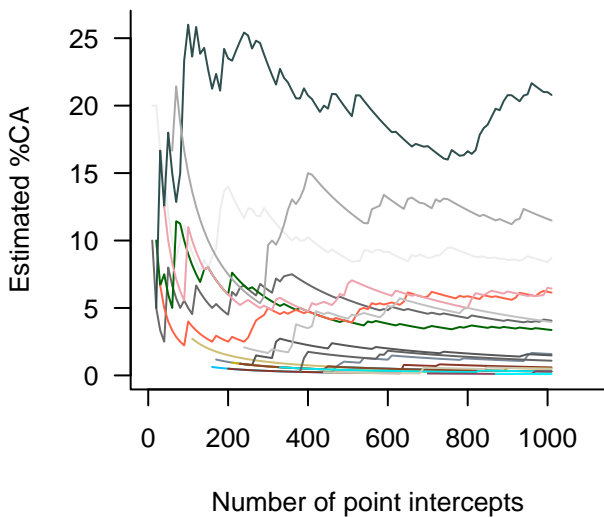

- Acacia cyclops*
- Acacia anceps*
- Carpobrotus virescens*
- Myoporum insulare*
- Rhagodia preissii* subsp. *preissii*

### WAAHAM0006-56944

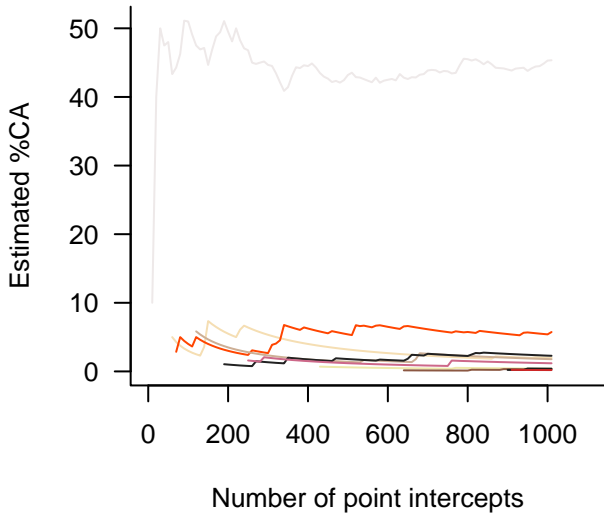

### WAALSD0001-53569

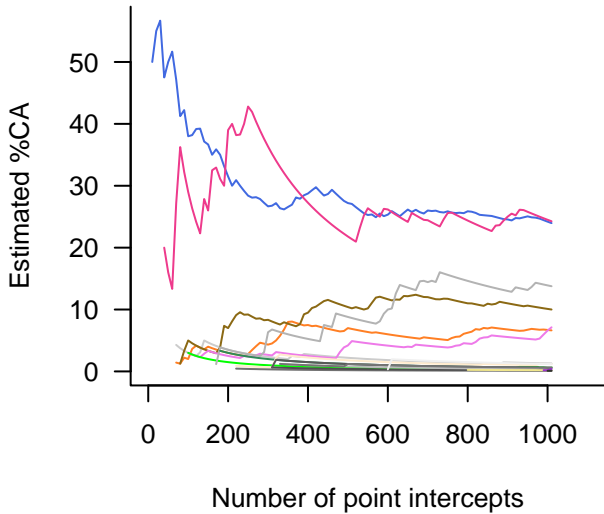

### WAALSD0002-53570

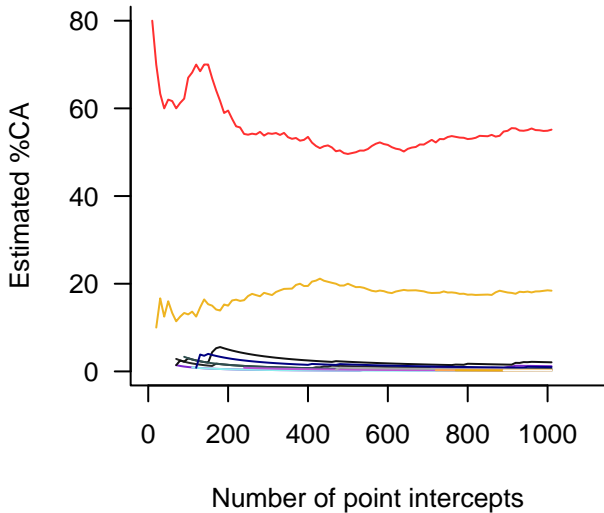

- Aluta maisonneuvei subsp. mais
- Triodia basedowii
- Triodia schinzii
- Micromyrtus flaviflora
- Eragrostis eriopoda

### WAALSD0003-53571

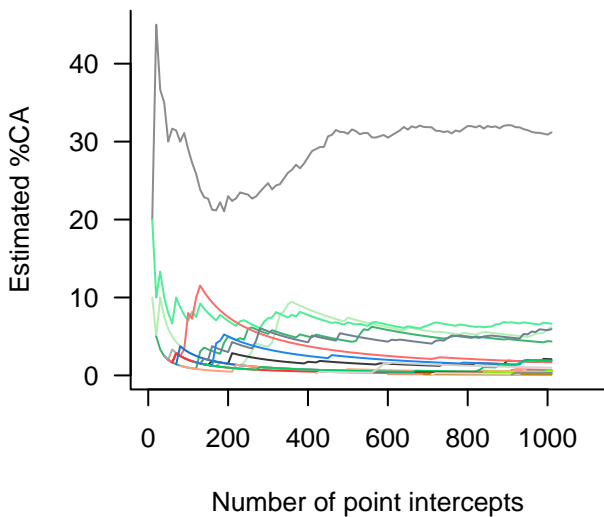

- Triodia basedowii
- Goodenia triodiophila
- Kennedia prorepens
- Acacia melleodora
- Acacia pachyacra

### WAAMAL0001-56962

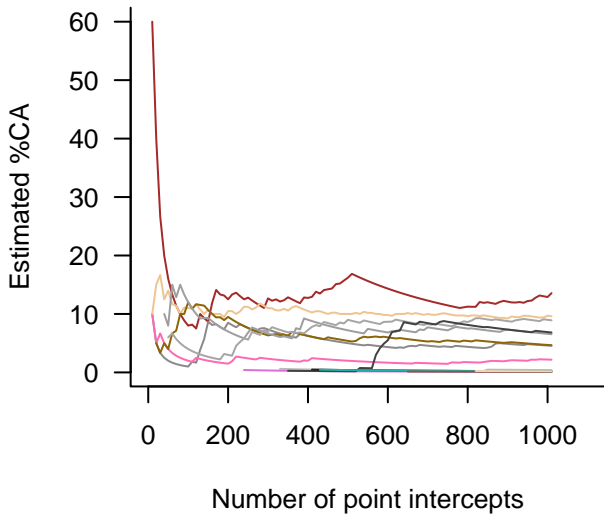

- Eucalyptus gracilis*
- Westringia rigida*
- Melaleuca lanceolata*
- Eucalyptus oleosa* subsp. *amplia*
- Eucalyptus yalataensis*

### WAAMUR0028-53572

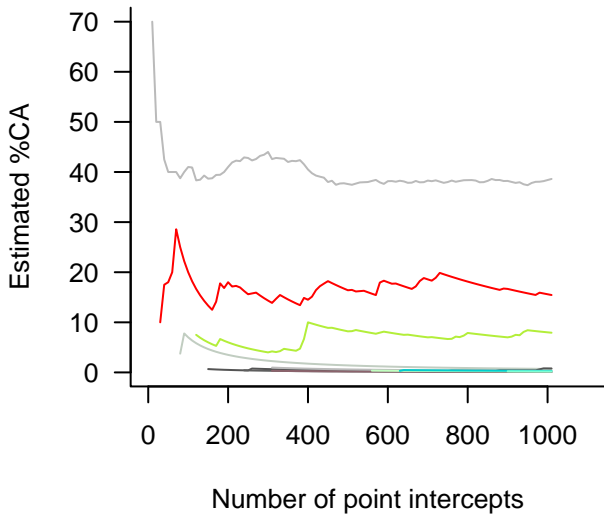

- Triodia basedowii*
- Acacia effusifolia*
- Eucalyptus gongylocarpa*
- Senna artemisioides* subsp. *filifo*
- Eucalyptus kingsmillii* subsp. *kin*

### WAAMUR0029-53573

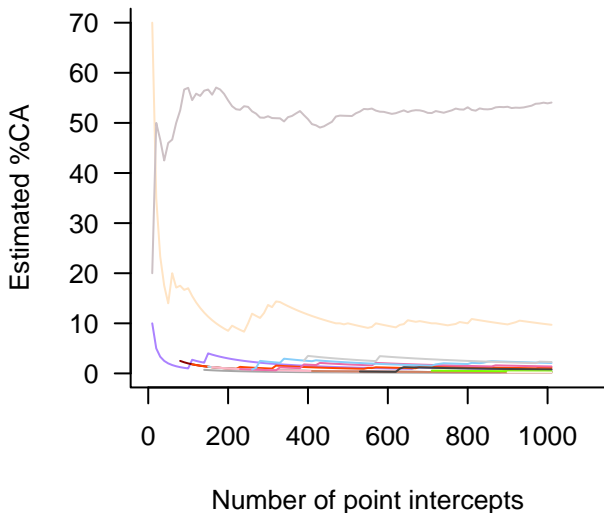

- *Triodia basedowii* aff. *t. lanigera*
- *Acacia effusifolia*
- *Eucalyptus gongylocarpa*
- *Keraudrenia velutina* subsp. *ellip*
- *Eremophila forrestii* subsp. *forre*

### WAAMUR0030-53464

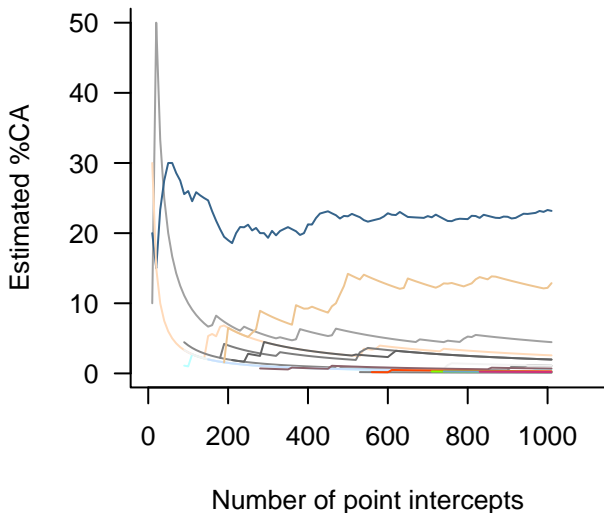

- *Triodia basedowii*
- *Eucalyptus gongylocarpa*
- *Acacia caesaneura* (narrow phyl)
- *Acacia aptaneura*
- *Acacia caesaneura*



### WAAMUR0031-53465

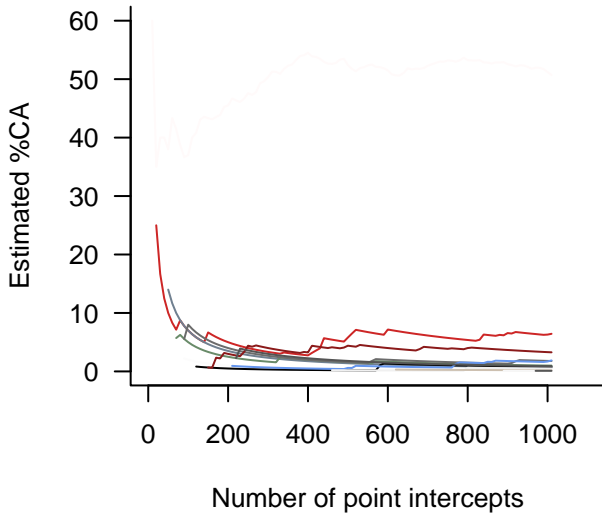

### WAANUL0001-56966

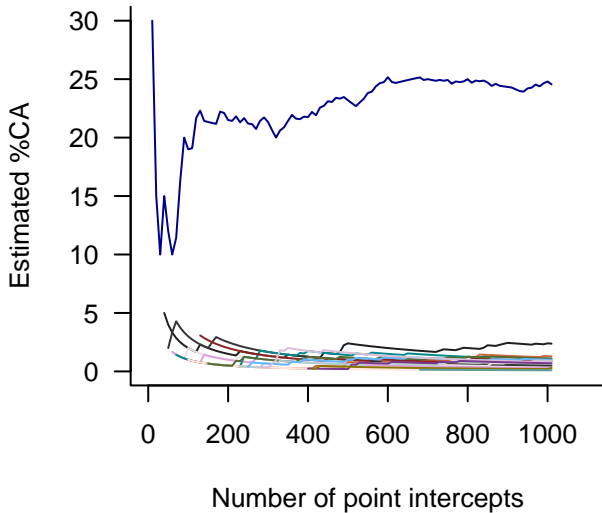

### WAANUL0002-56945

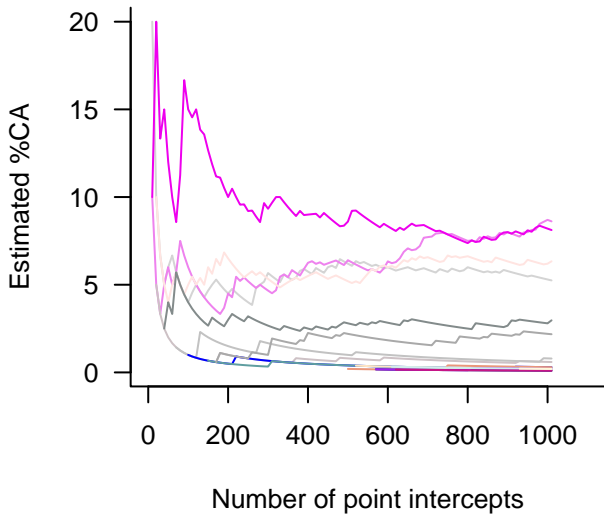

- Euphorbia multifaria*
- Rytidosperma caespitosum*
- Maireana sedifolia*
- Austrostipa nitida*
- Sida spodochroma*

### WAANUL0003-56946

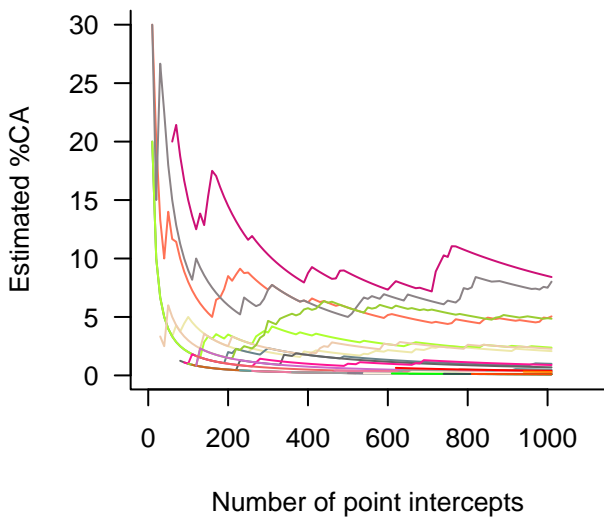

- Acacia papyrocarpa*
- Acacia aneura*
- Senna artemisioides* subsp. x pe
- Sclerolaena diacantha*
- Ptilotus obovatus*

### WAANUL0004-56967

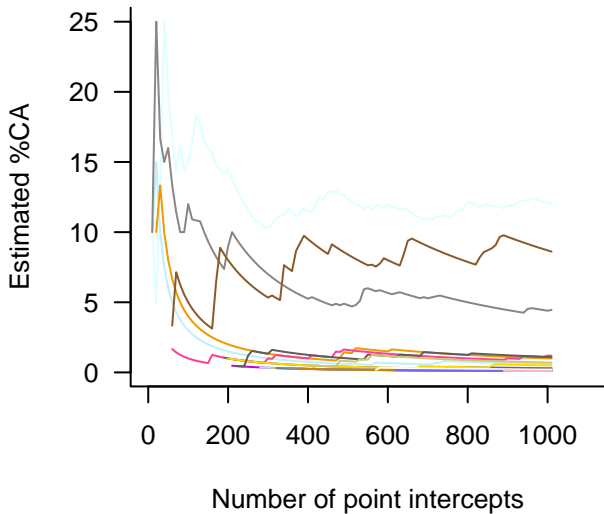

- Maireana sedifolia*
- Acacia papyrocarpa*
- Schoenia ayersii*
- Enneapogon cylindricus*
- Ptilotus obovatus*

### WAANUL0005-56931

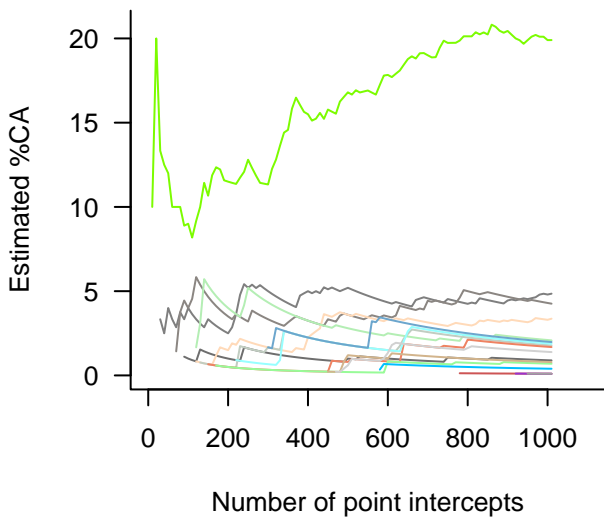

- Tetragonia eremaea*
- Zygophyllum iodocarpum*
- Calotis breviradiata*
- Sclerolaena patenticuspis*
- Erodium crinitum*

### WAANUL0006-56929

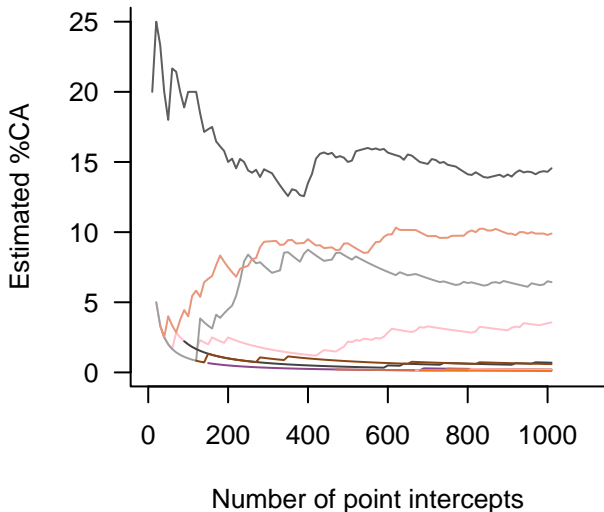

### WAANUL0007-56932

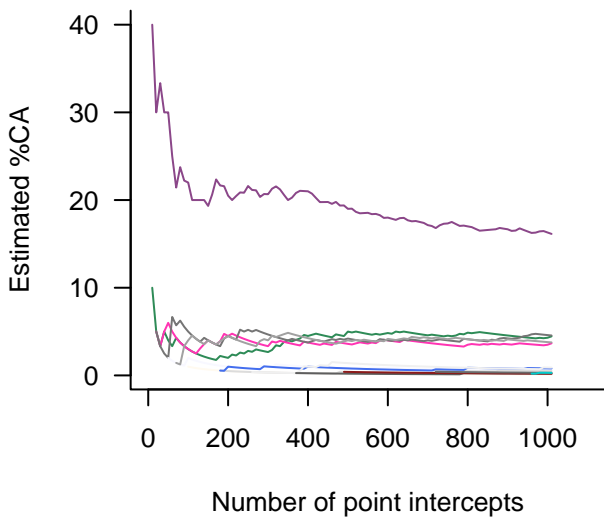

### WAANUL0008-56933

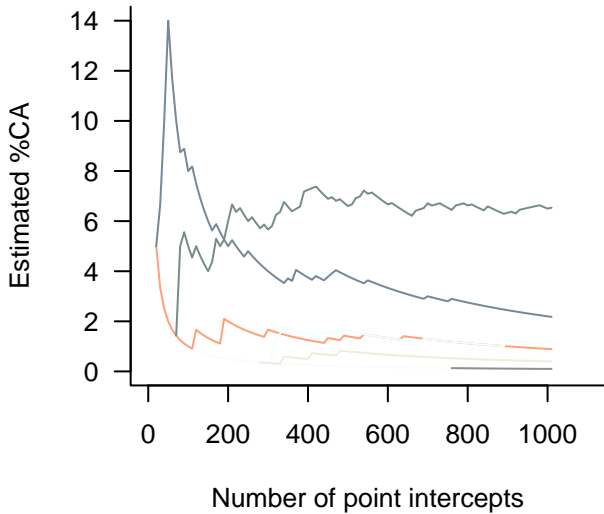

### WAANUL0009-56934

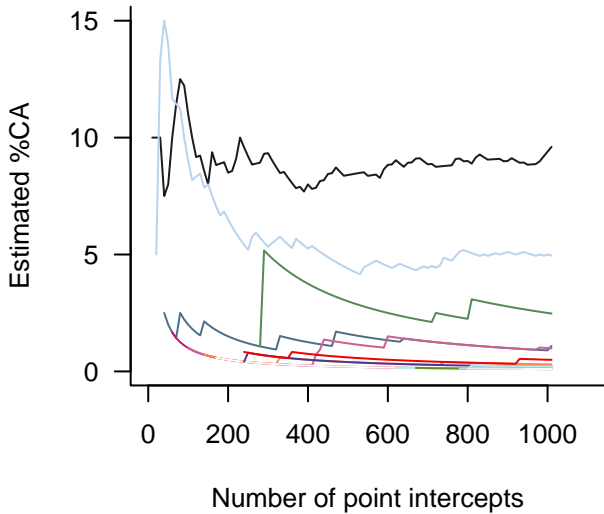

### WAAPIL0001-57619

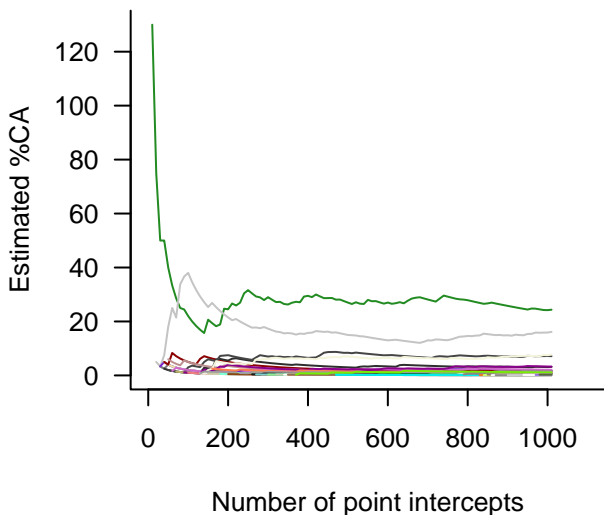

### WAAPIL0002-57620

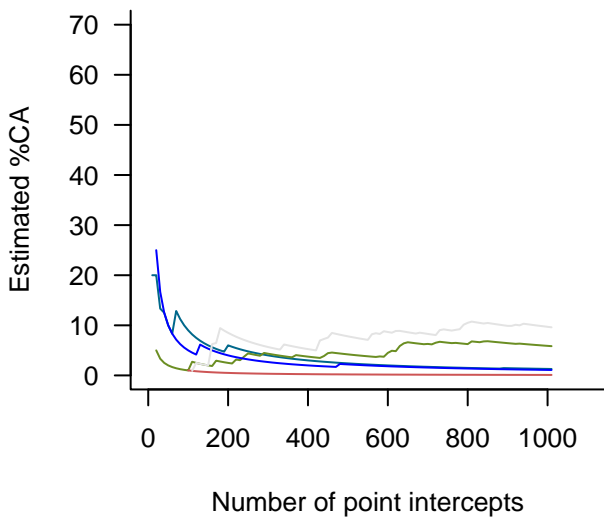

### WAAPIL0003-57601

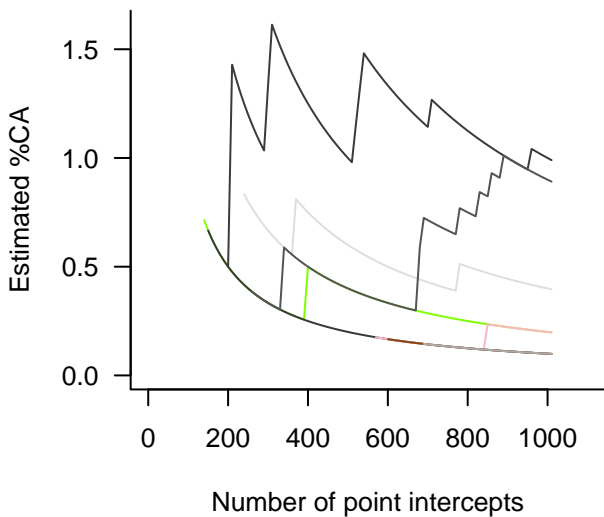

- Eucalyptus leucophloia subsp. le
- Triodia sp.
- Eriachne pulchella subsp. domin
- Bonamia pilbarensis
- Acacia maitlandii

### WAAPIL0004-57085

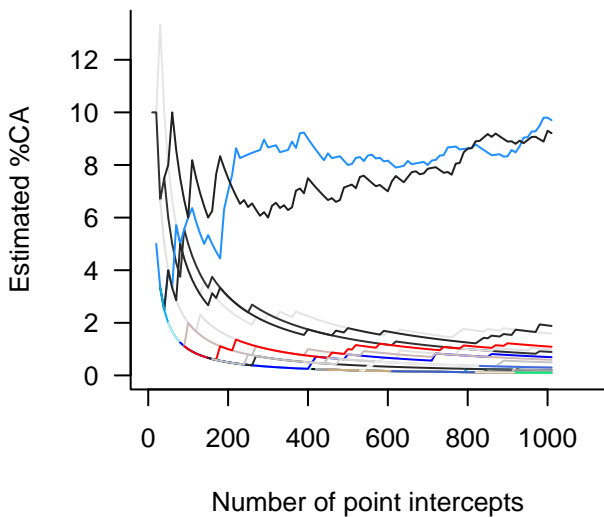

- Iseilema vaginiflorum
- Brachyachne convergens
- Aristida latifolia
- Rhynchosia minima
- Heliotropium conocarpum

### WAAPIL0005-57618

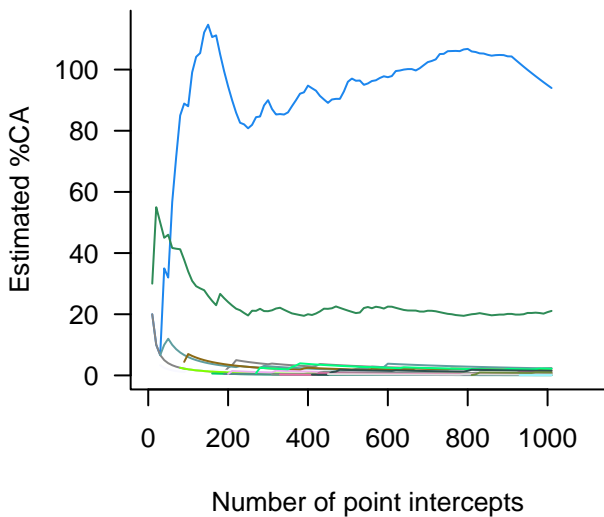

- Melaleuca bracteata
- Eucalyptus camaldulensis subsp.
- Themeda triandra
- Cyperus vaginatus
- Acacia ampliceps

### WAAPIL0006-57600

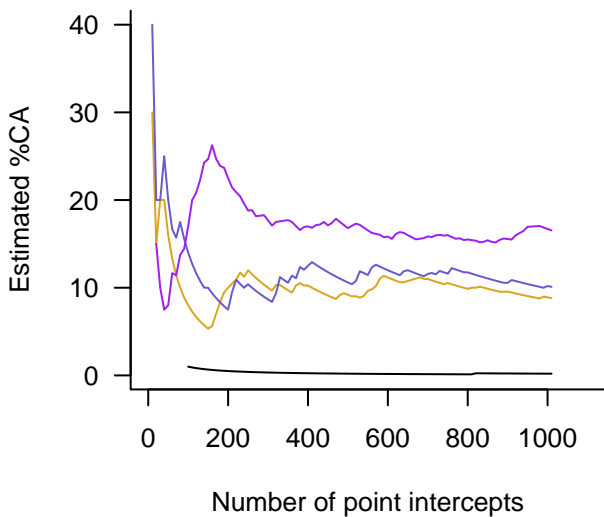

- Triodia brizoides
- Eucalyptus leucophloia subsp. le
- Triodia epactia
- Acacia ancistrocarpa



### WAAPIL0007-57602

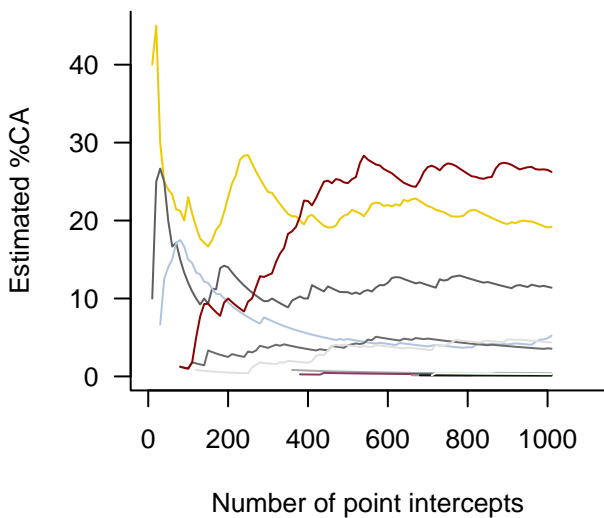

### WAAPIL0008-57605

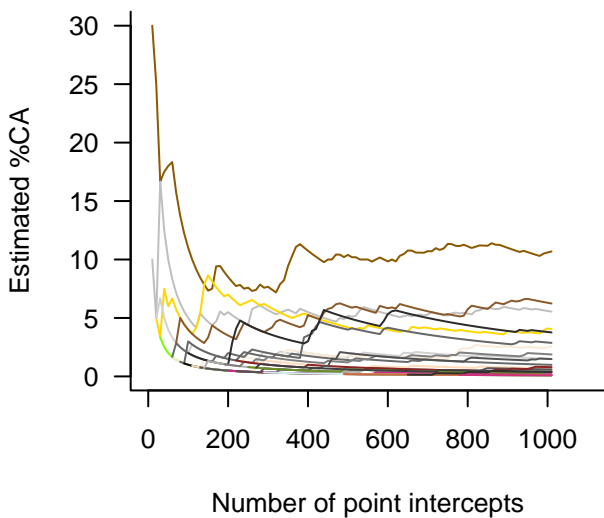

### WAAPIL0009-57606

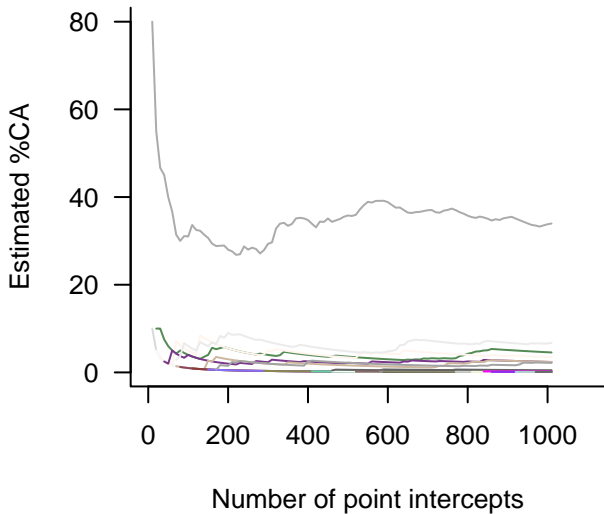

- *Eriachne benthamii*
- *Eulalia aurea*
- *Senna artemisioides* subsp. *olig*
- *Eucalyptus victrix*
- *Cullen cinereum*

### WAAPIL0010-57607

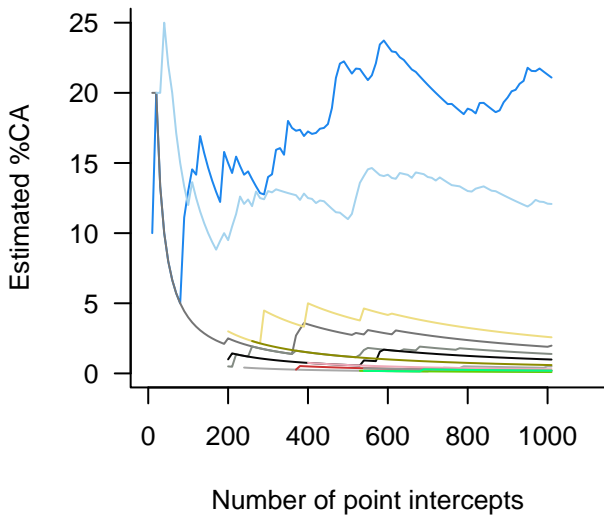

- *Acacia aptaneura*
- *Triodia epactia*
- *Corymbia hamersleyana*
- *Acacia ancistrocarpa*
- *Keraudrenia nephrosperma*

### WAAPIL0011-57608

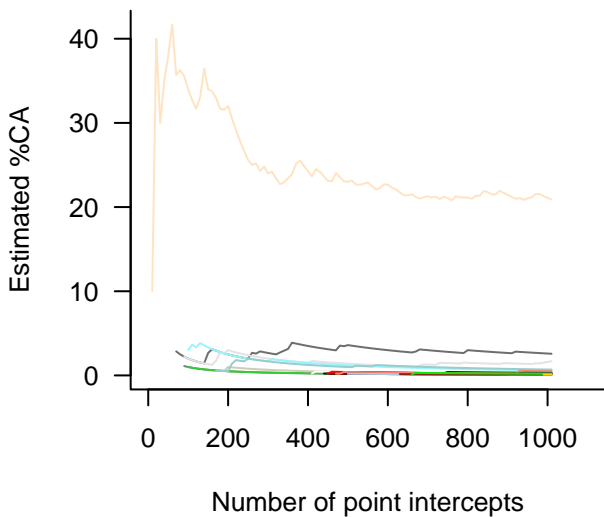

- Acacia xiphophylla
- Acacia synchronicia
- Eragrostis xerophila
- Sclerolaena densiflora
- Eriachne pulchella subsp. domin

### WAAPIL0012-57609

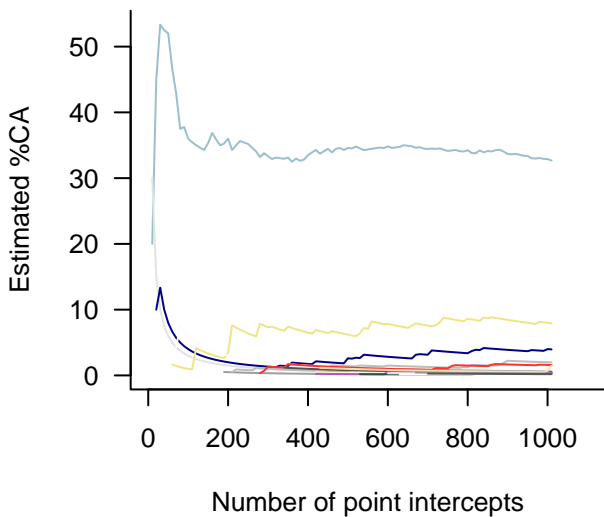

- Triodia* sp. *shovelanna hill* (s. var)
- Eucalyptus gamophylla*
- Acacia tenuissima*
- Triodia wiseana*
- Acacia bivenosa*

### WAAPIL0013-57610

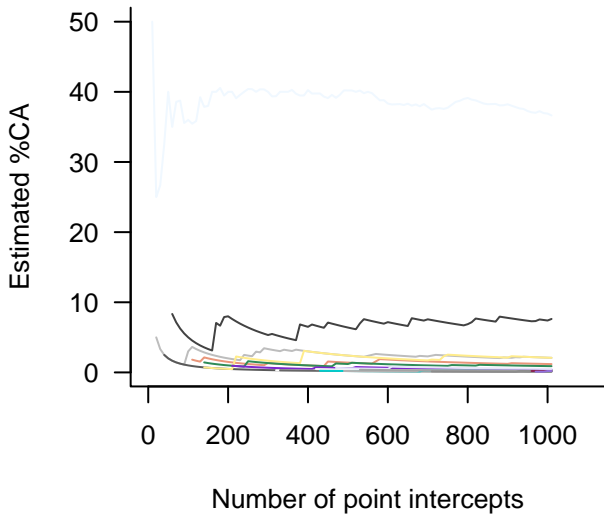

- Triodia wiseana*
- Eucalyptus leucophloia* subsp. *le*
- Eriachne lanata*
- Corymbia hamersleyana*
- Themeda triandra* s. *lat.*

### WAGCOO0001-53613

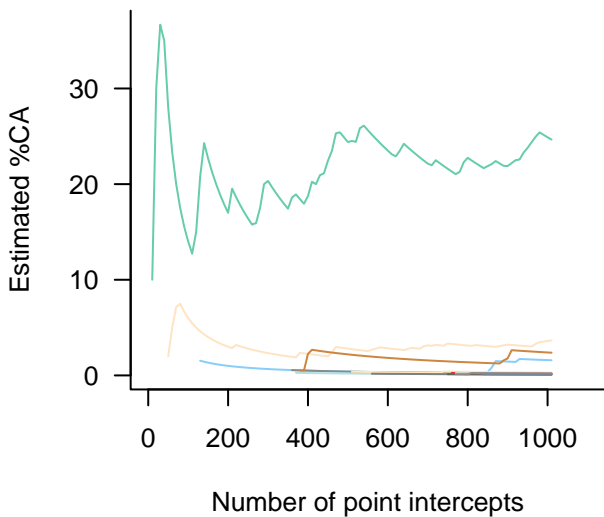

- Eucalyptus salmonophloia*
- Atriplex* sp.
- Acacia hemiteles*
- Acacia erinacea*
- Eremophila scoparia*

### WAGCOO0002-53614

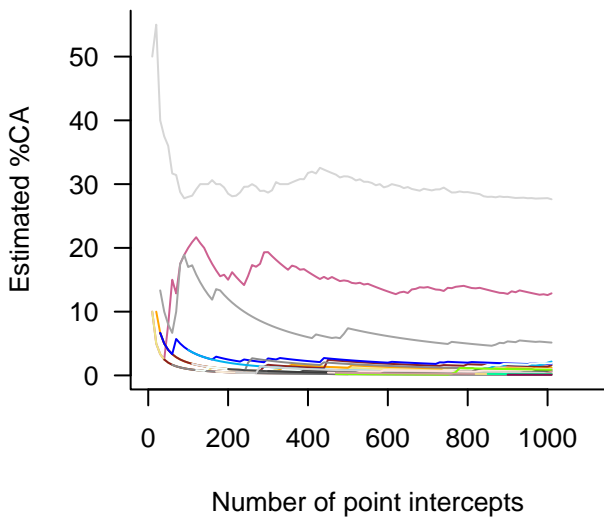

- *Triodia rigidissima*
- *Acacia yorkrakinensis* subsp. *ac*
- *Eucalyptus oldfieldii*
- *Eucalyptus rigidula*
- *Allocasuarina campestris*

### WAGCOO0004-53615

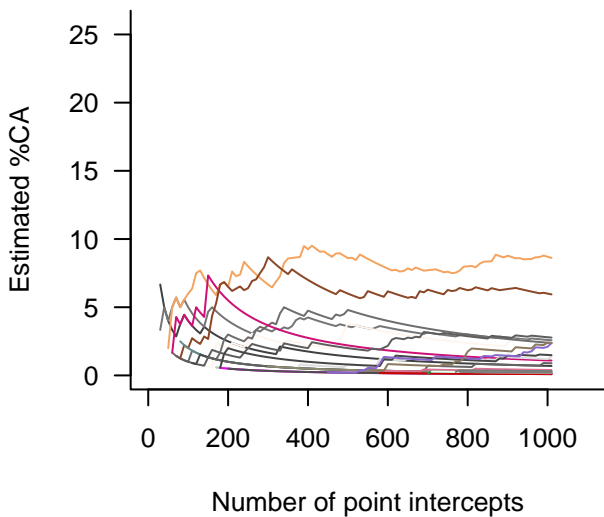

- *Maireana sedifolia*
- *Enneapogon caerulescens*
- *Maireana pyramidata*
- *Austrostipa nitida*
- *Salvia verbenaca*
