# Supplementary material for: Opportunities for Integrated Ecological Analysis across Inland Australia with Standardised Data from Ausplots Rangelands
Source: PubMed Central journal article supplement (PMC5241013; doi:10.1371/journal.pone.0170137), 2017-01-17

- Tussock grasslands
- Eucalypt woodlands
- Chenopod shrublands
- Acacia shrublands
- Acacia woodlands

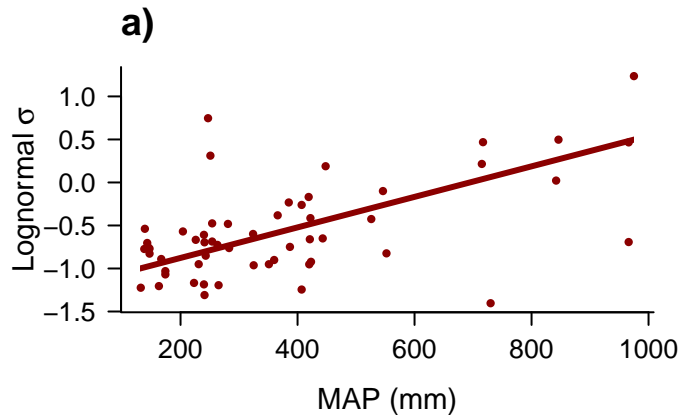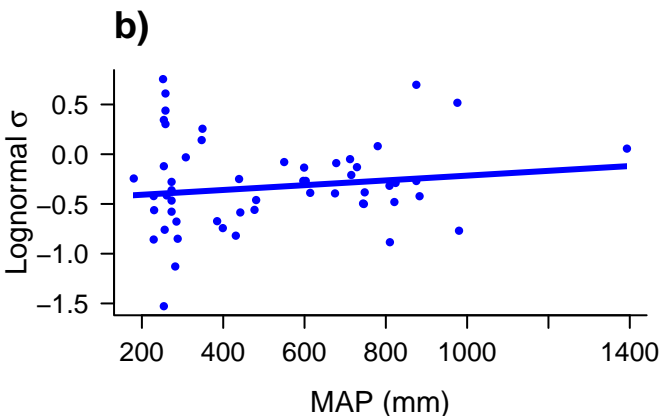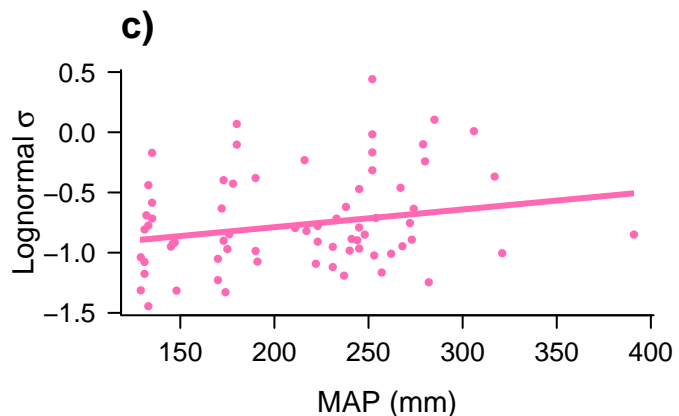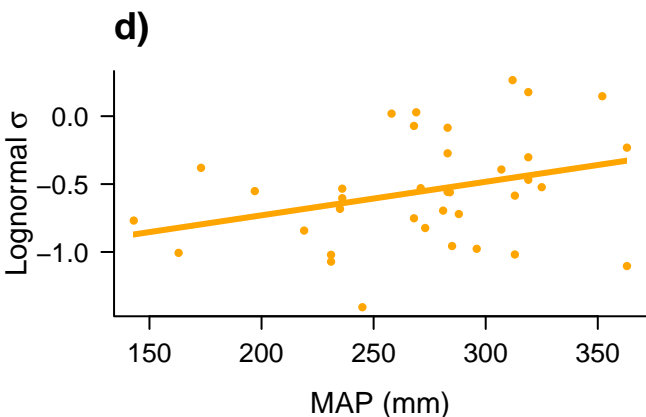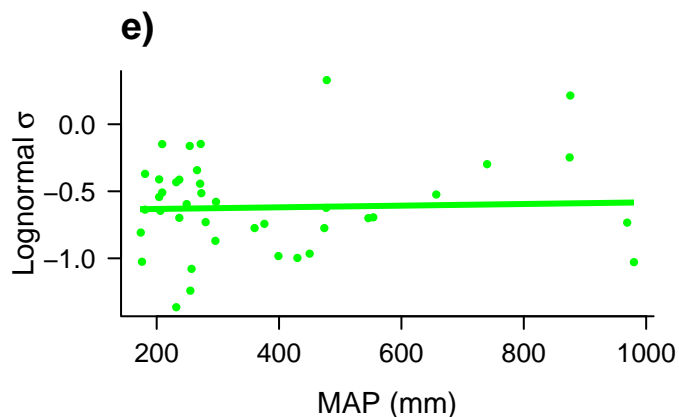

Supplement: pone.0170137.s006.pdf [file pone.0170137.s006.pdf]
